# Supplementary material for: Distinct types of short open reading frames are translated in plant cells
Source: HighWire-hosted journal article supplement (doi:10.1101/gr.253302.119), 2019-08-06
Supplement: Supplemental_Fig_S1.pdf.pdf [file Supplemental_Fig_S1.pdf.pdf]

**A**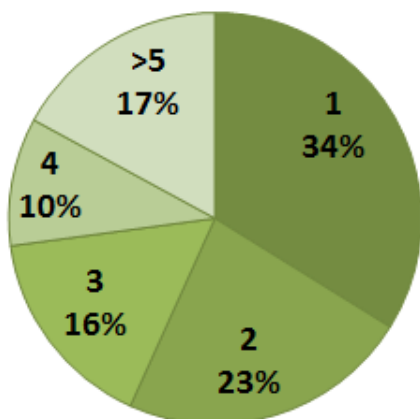**B**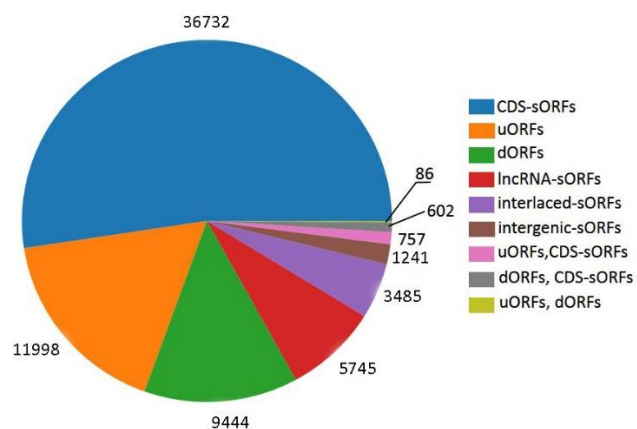

**Supplemental Fig. S1 Overview of the identified sORFs.** **A** – Pie chart showing the number of identified sORFs per transcript; **B** – Pie chart with the distribution of numbers of different sORF types.
