# Supplementary material for: Distinct types of short open reading frames are translated in plant cells
Source: HighWire-hosted journal article supplement (doi:10.1101/gr.253302.119), 2019-08-06
Supplement: Supplemental_Fig_S2.pdf.pdf [file Supplemental_Fig_S2.pdf.pdf]

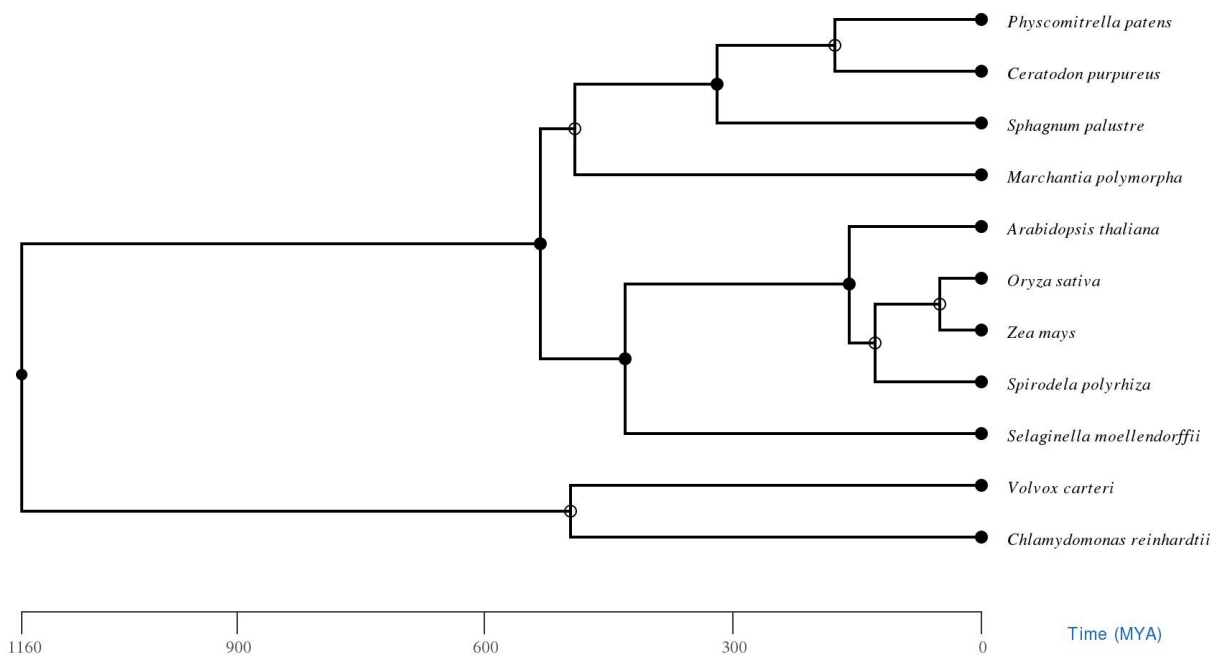

**Supplemental Fig. S2. Phylogenetic tree showing the divergence between analyzed species (the tree was generated by timetree.org.)** The selected species include those that diverged from *P. patens* 177 (*Ceratodon purpureus*), 320 (*Sphagnum fallax*), 493 (*Marchantia polymorpha*), 532 (*Arabidopsis thaliana*, *Oryza sativa*, *Zea mays*, *Selaginella moellendorffii* and *Spirodela polyrhiza*) and 1160 (*Volvox carteri* and *Chlamydomonas reinhardtii*) Mya.
