# Supplementary material for: Distinct types of short open reading frames are translated in plant cells
Source: HighWire-hosted journal article supplement (doi:10.1101/gr.253302.119), 2019-08-06
Supplement: Supplemental_Fig_S4.pdf.pdf [file Supplemental_Fig_S4.pdf.pdf]

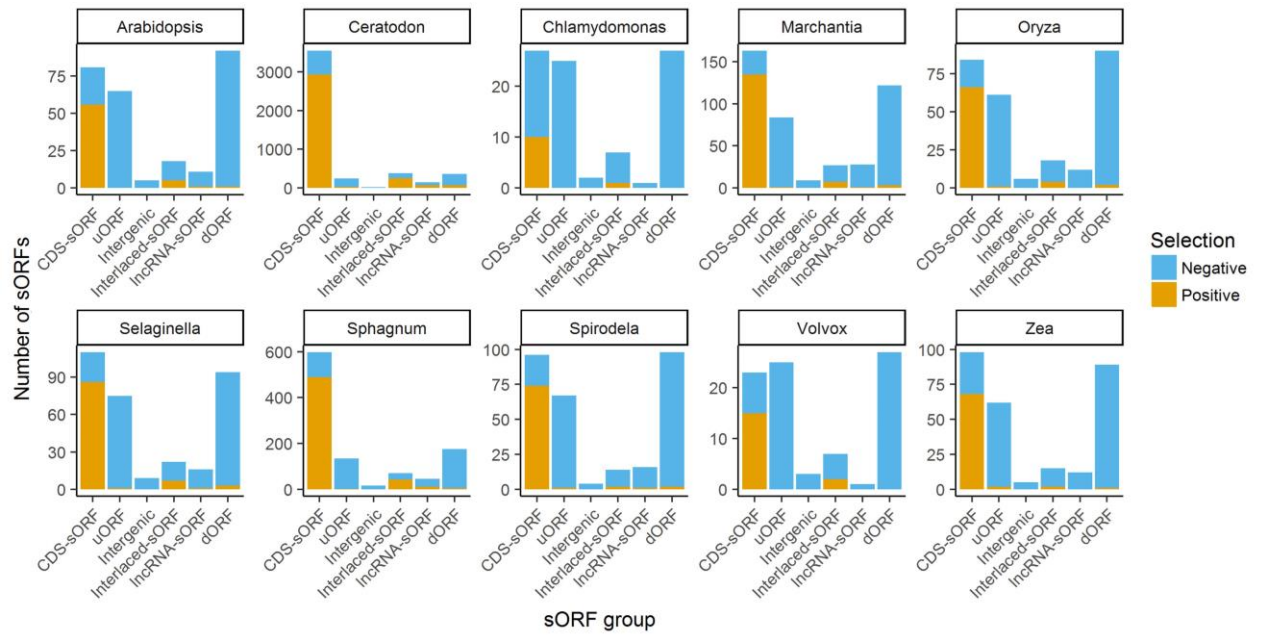

**Supplemental Fig. S4.** Pairwise  $K_A/K_S$  ratio distribution for each type of sORF conserved among ten plant species.
