# Supplementary material for: Distinct types of short open reading frames are translated in plant cells
Source: HighWire-hosted journal article supplement (doi:10.1101/gr.253302.119), 2019-08-06
Supplement: Supplemental_Fig_S5.pdf.pdf [file Supplemental_Fig_S5.pdf.pdf]

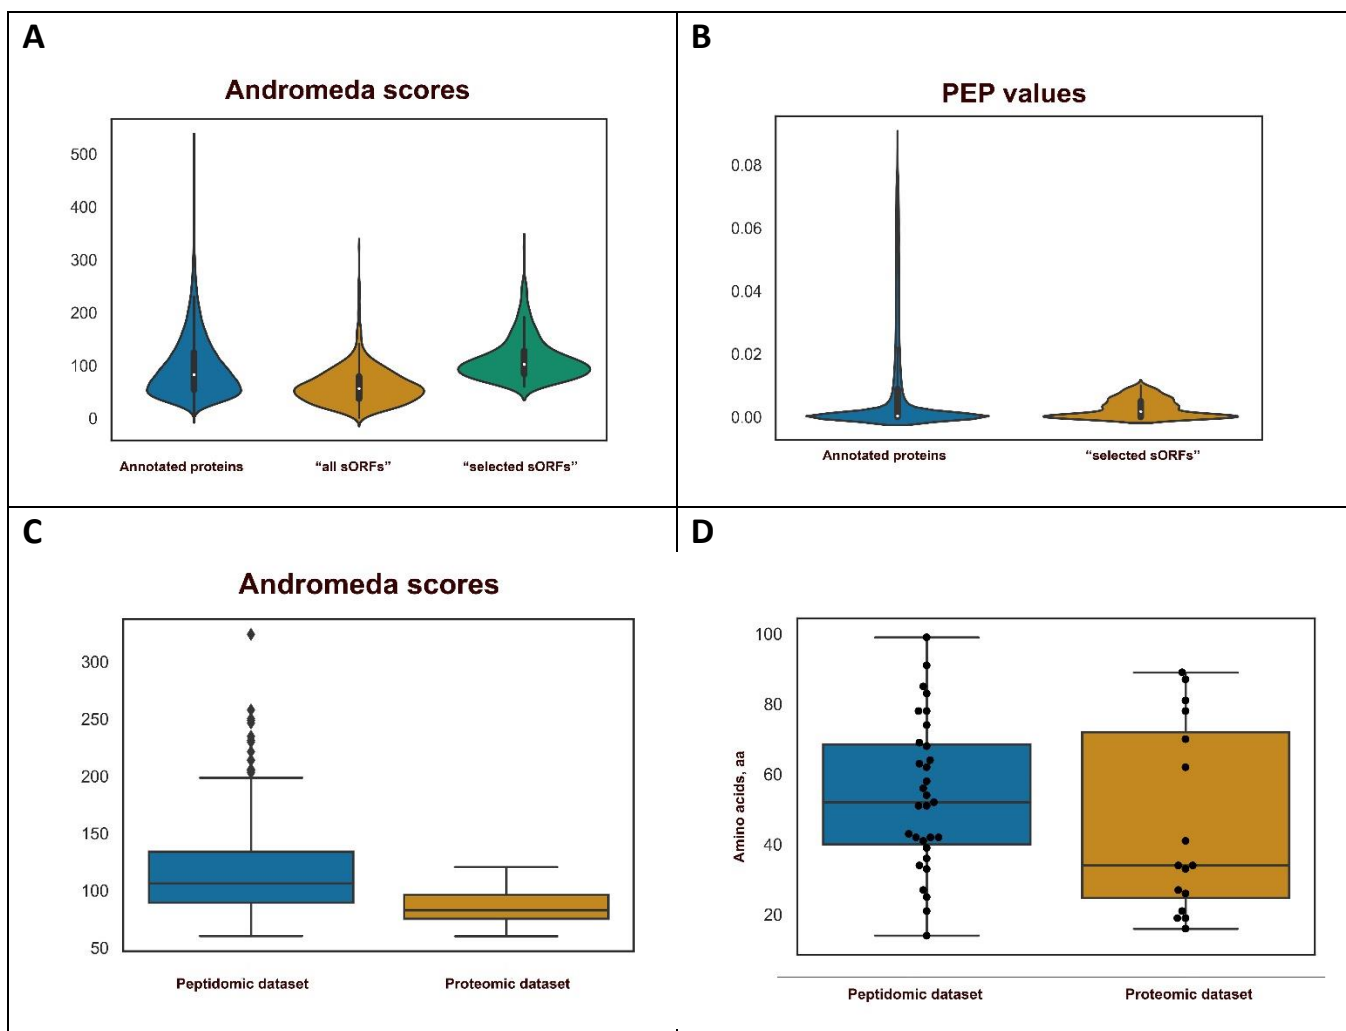

**Supplemental Fig. S5. Experimental evidences of sORFs translation.** The comparison of score and posterior error probability (PEP) values for PSM supporting identification of sORF-encoded peptides and protein sequences: **A, B** – Andromeda scores/PEPs for PSMs mapping to annotated protein sequences, identified sORFs ("all sORFs", PSM FDR 1%), high confidence sORFs ("selected sORFs", PSM FDR1%, PEP $\leq$  0.01, score  $\geq$  30). **C** – Comparison of Andromeda score for high confidence sORFs from "peptidomic" and "proteomic" datasets; **D** – Distribution of high confidence sORF lengths in "peptidomic" and "proteomic" datasets.
