# Supplementary material for: Distinct types of short open reading frames are translated in plant cells
Source: HighWire-hosted journal article supplement (doi:10.1101/gr.253302.119), 2019-08-06
Supplement: Supplemental_Fig_S6.pdf.pdf [file Supplemental_Fig_S6.pdf.pdf]

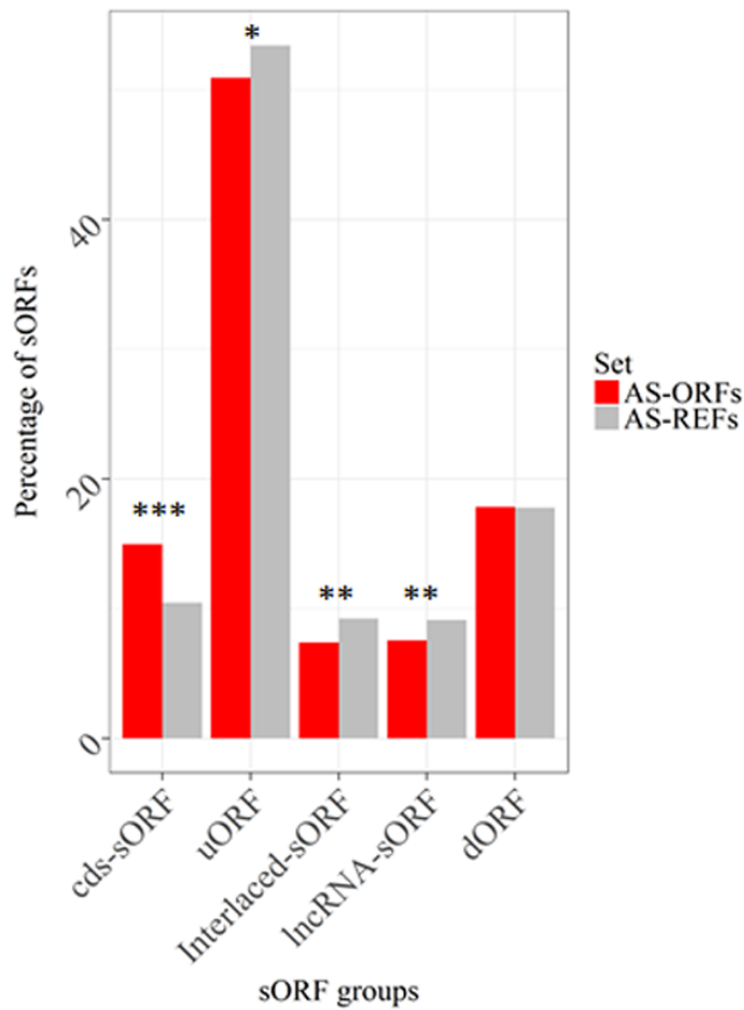

**Supplemental Fig. S6.** Enrichment analysis of different sORF groups in a set of AS-sORFs and AS-REFs. AS-sORF sequences were classified: 1) truncation, when the middle region of the sORF was excised by splicing; 2) stop codon excision, when the sORF stop codon was spliced out; 3) start codon excision, when the sORF start codon was spliced out; and 4) excision, if the complete sORF was removed from an isoform. P-value was calculated by Fisher's exact test. \*\*\* $P < 10^{-9}$ ; \*\* $P < 0.001$ ; \* $P < 0.05$ .
