# Supplementary material for: Distinct types of short open reading frames are translated in plant cells
Source: HighWire-hosted journal article supplement (doi:10.1101/gr.253302.119), 2019-08-06
Supplement: Supplemental_Fig_S8.pdf.pdf [file Supplemental_Fig_S8.pdf.pdf]

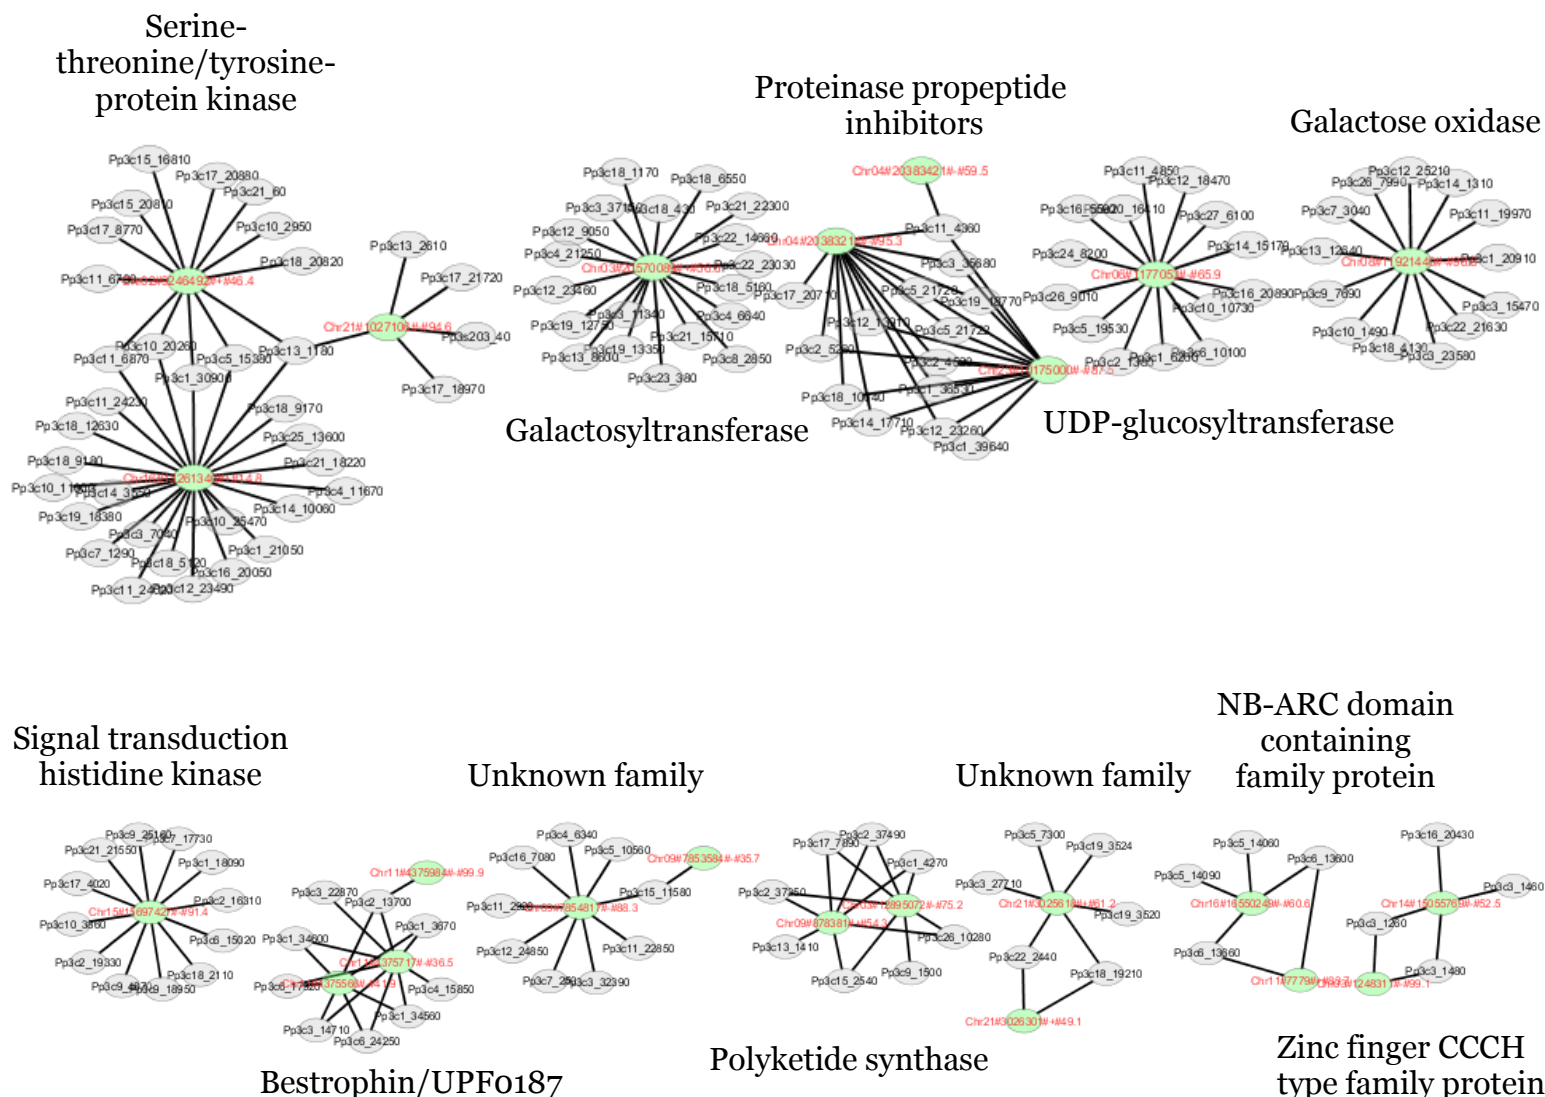

**Supplemental Fig. S8.** Network clusters for sORFs with similarity to more than 4 distinct proteins; Grey and green nodes correspond to sORFs and proteins, respectively while edges show similarity between them based on BLASTP results. Protein families shown for each cluster were established based on pfam domain content and gene annotation data from Phytozome v.12.
