# Supplementary material for: Distinct types of short open reading frames are translated in plant cells
Source: HighWire-hosted journal article supplement (doi:10.1101/gr.253302.119), 2019-08-06
Supplement: Supplemental_Fig_S15.pdf.pdf [file Supplemental_Fig_S15.pdf.pdf]

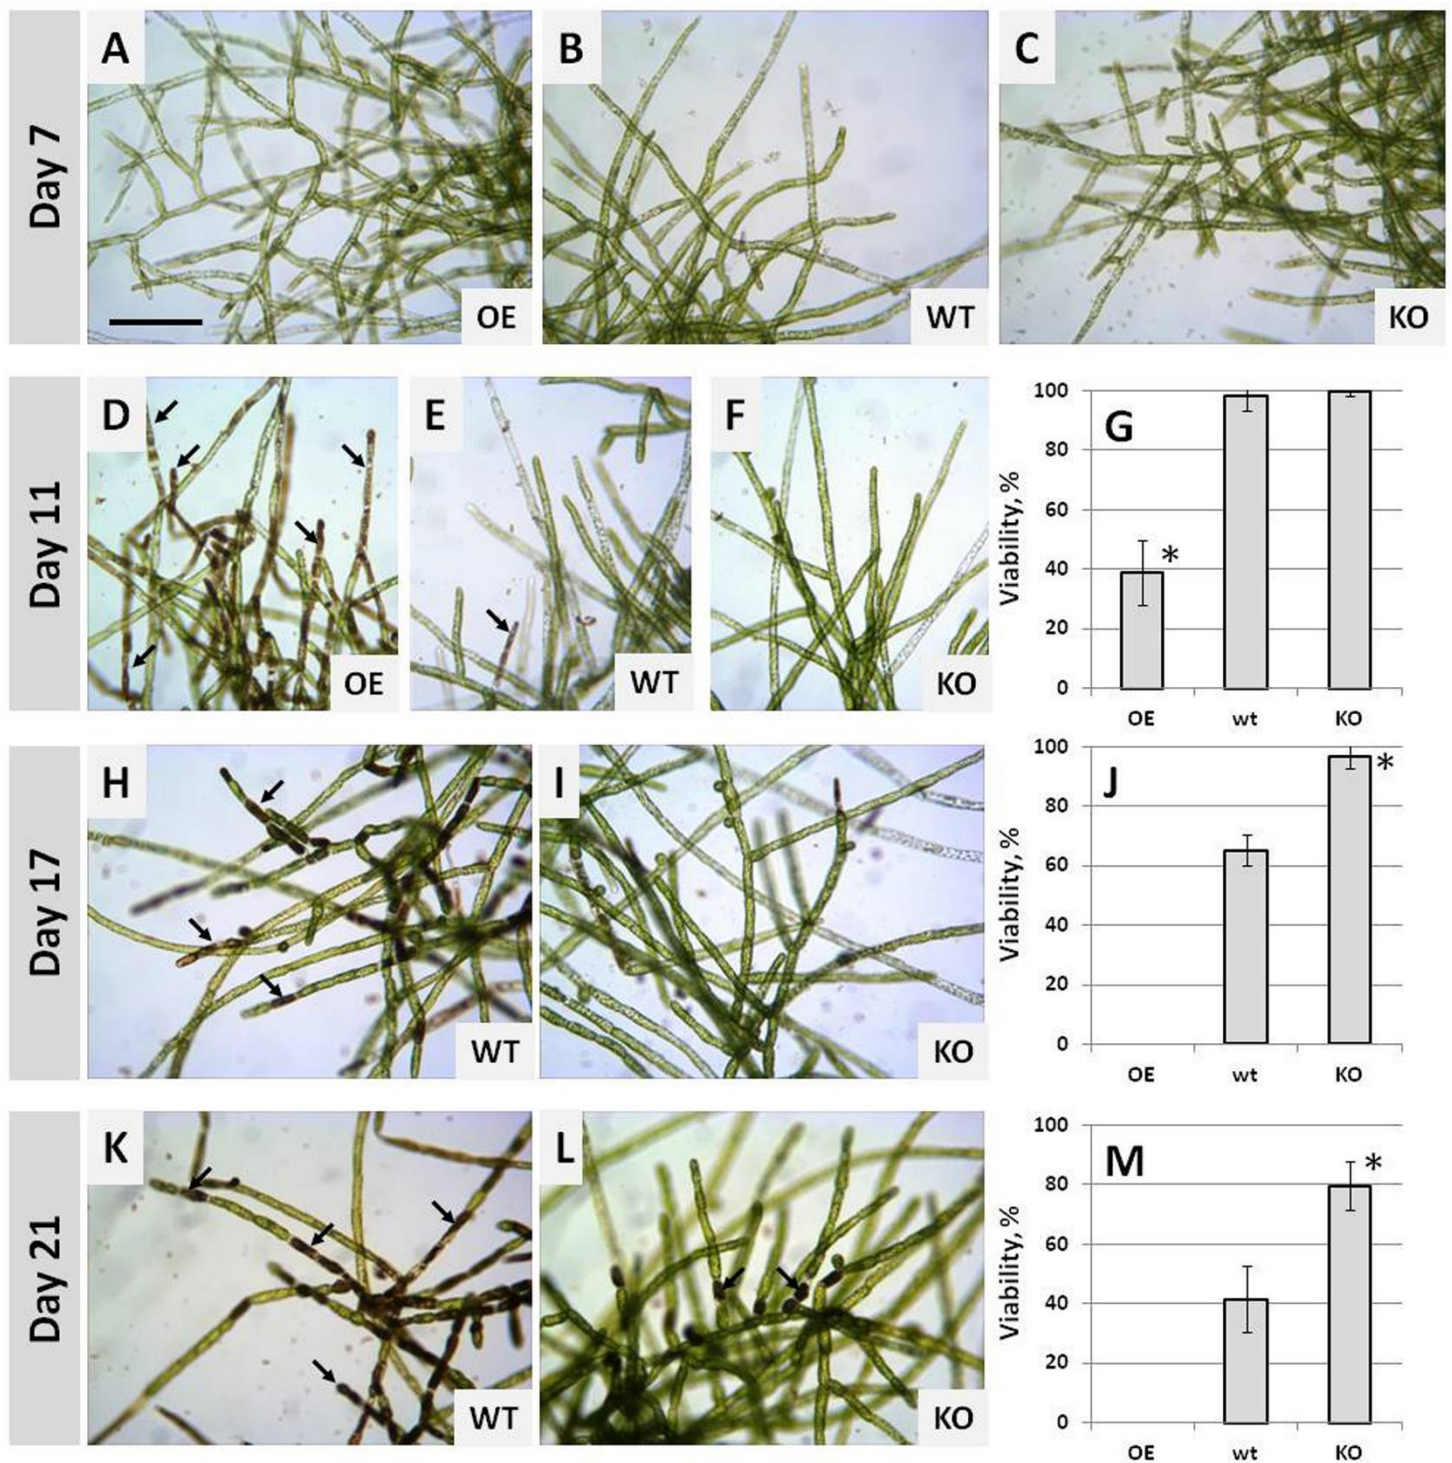

**Supplemental Fig. S15. The growth of PSEP1 knockout (KO) and overexpression (OE) lines in liquid culture.** A, D – overexpression of PSEP1; B, E, H, K – wild type; C, F, I, L – knockout line. Viability of protonemal tissues was calculated at day 11 (G), 17 (J) and 21 (M). Arrows indicate died cells. Scale bar: 200 mm. P-value was calculated by Student's t-test. \*P < 0.01.
