# Supplementary material for: Distinct types of short open reading frames are translated in plant cells
Source: HighWire-hosted journal article supplement (doi:10.1101/gr.253302.119), 2019-08-06
Supplement: Supplemental_Methods.docx.docx [file Supplemental_Methods.docx.docx]

**Supplemental Methods**

**Identification of coding sORFs in the P. patens genome**

Intron (negative dataset) and CDS (positive dataset) sequences were extracted from the *P. patens* v3.3 genome (Phytozome v12) by parsing a gff3 file of the moss genome annotation using custom-made python scripts (GffParser.py), followed by DNA sequence extraction using the subcommand getfasta from bedtools ([Quinlan and Hall 2010](#_ENREF_7)). These sequences were used to train sORFfinder (Hanada et al. 2009) as described in the user manual. Parameter -d was set to “b” for searching the sORF sequences in both direct and reverse orientation. The search for sORFs was performed using the whole genome sequence of *P. patens* (release 3.3, <https://phytozome.jgi.doe.gov/pz/portal.html#!info?alias=Org_Ppatens>). Of the 6,706,696 sORF sequences found in the genome, 786,439 had high coding potential according to the sORF finder.

**Evolutionary conservation analysis**

For analysis of sORFs divergency in different ecotypes the ecotype genomes were reconstructed using VCF files of  ‘Villersexel’, ‘Reute’ and ‘Kaskasia’ ([Hiss et al. 2017](#_ENREF_4)) downloaded from CoGe database (https://genomevolution.org/coge) and moss reference sequence v.3.1 ([Lang et al. 2018](#_ENREF_5)) downloaded from Phytozome ([Goodstein et al. 2012](#_ENREF_3)). To get fasta files of the ecotype genomes the reference genome and VCF files were used as input files to GATK 'FastaAlternateReferenceMaker' tool ([McKenna et al. 2010](#_ENREF_6)). For test of sORF completeness in three ecotypes the script (sORF_completeness_v2.1.py) was used to estimate the presence of in-frame start and stop codons within, downstream and upstream of alignment regions. If a stop codon was found upstream of an alignment region, it was considered to be a premature termination codon (PTC). Otherwise, start and stop codons closest to the alignment region were used for homologous sORF length calculation.

**Peptide extraction**

Protonemata and gametophores were immediately frozen with liquid nitrogen and ground to fine dust with a pestle pre-cooled to −70°C. The ground material was placed into cooled extraction buffer (1 М acetic acid in 10% acetonitrile and 10 μL/mL of Protease Inhibitor Cocktail (Sigma-Aldrich)) and homogenized using a Dismembrator S ball mill (Sartorius, Göttingen, Germany) at 2600 rpm for 2 min with a mix of glass balls of 0.1, 0.3, and 1 mm diameter (Sartorius). The suspension was centrifuged at 11,000 ×g for 10 min at 4°C. The supernatant was placed into a gel filtration column to extract and fractionate the peptides. Gel filtration was carried out on a 2.5 cm × 30 cm column filled with Sephadex G-25 superfine in 0.1 M acetic acid. The fractions containing peptides were lyophilized and resuspended in 5% acetonitrile-0.1% trifluoroacetic acid. Before recording the mass spectra, samples were desalted on reversed phase C18 microcolumns, which were prepared in 200μL tips for an automatic pipette with two layers of Empore™extraction disk reversed-phase C18 membrane (Supelco, Bellefonte, PA, USA) 1.6 mm in diameter.

**Protein extraction**

Plant tissues were ground to fine powder in liquid nitrogen, and three volumes of ice-cold extraction buffer (500 mM Tris-HCl, pH 8.0, 50 mM EDTA, 700 mM sucrose, 100 mM KCl, 1 mM PMSF, 1 mM DTT) were added, followed by incubation for 10 min on ice. Then, an equal volume of ice-cold Tris-HCl (pH 8.0)-saturated phenol was added, and the mixture was vortexed and incubated for 10 min with shaking. After centrifugation (10 min, 5500 g, 4C), the phenol phase was collected and re-extracted with extraction buffer. Proteins were precipitated from the final phenol phase with 3 volumes of ice-cold 0.1 M ammonium acetate in methanol overnight at −20 C and centrifuged for 10 min at 5500 g and 4 C. The pellets were rinsed with ice-cold 0.1 M ammonium acetate in methanol three times and with ice-cold acetone containing 13 mM DTT once and then dried. Pellets were solubilized in sample buffer (8 M urea, 2 M thiourea, 10 mM Tris-HCl, pH 8.0). Protein content was estimated according to Bradford procedure using the Quick Start Bradford protein assay (Bio-Rad, Hercules, CA USA); bovine serum albumin was used to prepare standard solutions. Four biological repeats for gametophores, four for protonemal and four for protoplast samples were used.

**Mass-spectrometry analysis**

For the Q Exactive HF mass spectrometer (Thermo Fisher Scientific, USA), peptide samples were separated by high-performance liquid chromatography (HPLC, Ultimate 3000 Nano LC System, Thermo Scientific, USA) in a 15-cm long C18 column with a diameter of 75 μm (Acclaim® PepMap™ RSLC, Thermo Fisher Scientific, USA). The peptides were eluted with a gradient from 5–35 % buffer B (80 % acetonitrile, 0.1 % formic acid) for 45 min at a flow rate of 0.3 μl/min. The total run time, including 10 min to reach 99% buffer B, flushing 5 min with 99% buffer B and 10 min re-equilibration to buffer A (0.1% formic acid) amounted to 70 min. Mass spectra were acquired at a resolution of 60,000 (MS) and 15,000 (MS/MS) in a range of 400–1500 m/z (MS) and 200–2000 m/z (MS/MS). An isolation threshold of 67,000 was determined for precursor selection and (up to) the top 10 precursors were chosen for fragmentation via high-energy collisional dissociation (HCD) at 25 NCE and 100 ms activation time. Precursors with a charged state of +1 were rejected, and all measured precursors were excluded from measurement for 20 s.

Mass-spectrometry analysis on a TripleTOF 5600+ mass spectrometer with a NanoSpray III ion source (ABSciex, Framingham, MA 01701, USA) coupled with a NanoLC Ultra 2D+ nano-HPLC system (Eksigent, Dublin, CA, USA) was performed as described ([Fesenko et al. 2016](#_ENREF_2)).

**Peptide identification**

To filter out MS peptides that do not provide unambiguous evidence of sORF peptide expression, we assessed the number of times a peptide occurred in the whole moss genome by searching for exact matches to the MS peptides in the six-frame translated genome. The moss genome has a number of paralogous genes that resulted from two whole-genome duplication events ([Lang et al. 2018](#_ENREF_5)). MS peptides from such paralogous sORFs will be discarded if they match to more than one locus in the genome. To prevent this, we identified paralogous sORFs in the moss genome by tBLASTn and aligned their coordinates with the multi-hit MS peptide coordinates. This identified 15 MS peptides (14 sORFs) that matched to paralogous sequences and were discarded from further analysis. Our final high-confidence set included 45 translatable sORFs.

**Generation of overexpression lines**

For moss transformation, pPLV-Hpa (“empty” plasmid), pPLV-Hpa-4FR (PSEP1), pPLV-Hpa-3FR (PSEP3), pPLV-Hpa-25FR (PSEP25), pPLV-Hpa-18FR (PSEP18) plasmids were purified using a Qiagen Plasmid Maxi Kit (Qiagen, Germany) and linearized with SacI (pPLV-Hpa-4FR-SacI). The nucleotide sequences of the cloned fragments were verified by sequencing using a BigDye Terminator Cycle Sequencing Kit (v. 3.1) and AbiPrism 3730xl (Applied Biosystems, USA).

To select clones overexpressing PSEP1, PSEP3, PSEP25 and PSEP18 the transformed protoplasts were planted on selective medium containing hygromycin, and knockout lines were selected on G418. Selection for hygromycin resistance was repeated twice, and after 1 week, the clones of survivors were placed in standard medium. The presence of the insert was determined by PCR with primer pairs p5-p4r (PSEP1), pnF3-pnR3 (PSEP3), pnF25-pnR25 (PSEP25), pnF18-pnR18 (PSEP18) and HygF-HygR (Supplemental Table S7).

**Generation of knockout lines**

We generated plasmid containing sgRNA expression cassette with internal restriction enzyme sites that permit rapid, directional cloning of 20-mer guide sequences. This cassette consists of U6 promoter from *P. patens* and the tracrRNA scaffold ([Collonnier et al. 2017](#_ENREF_1)) with two BbsI sites between them. The cassette was synthesized from oligonucleotides (Supplemental Table S7) and cloned into TA vector pTZ57R/T (Thermo Fischer Scientific, USA). The resulting plasmid was named pBB.

The plasmid pBB with the guide RNA expression cassette is linearized by digestion with BbsI. Oligonucleotides are designed to contain a compatible overhangs and a 20-mer guide sequence (targeting PSEP1, PSEP3, PSEP25, PSEP18; Supplemental Table S7). The hybridized oligonucleotides (3GTop-3GBottom etc.) are ligated into the digested plasmid, yielding the final complete sgRNA expression cassette. The resulting plasmids were named pBB-3-1 for PSEP1, pBB-3 for PSEP3, pBB-25 for PSEP25 and pBB-18 for PSEP18. For moss transformation the plasmids were purified by Qiagen Plasmid Maxi Kit (Qiagen, Germany).

For obtaining knockout lines the transformation was carried out using mixture of three plasmids (7.5 μg each): 1) one of the pBB plasmid (pBB-3-1 for PSEP1, pBB-3 for PSEP3, pBB-25 for PSEP25, pBB-18 for PSEP18) carrying guide RNA expression cassette; 2) pACT-CAS9 carrying CAS9 gene; 3) pBNRF plasmid carrying resistance gene to G418. The plasmids pACT-CAS9 (for CAS9 expression) and pBNRF (resistance to G418) were kindly provided by Dr. Fabien Nogué. After that protoplasts were spread onto regeneration medium (BCDAT medium supplemented with 0.33 M mannitol) in both cases. The sequences of targeting sites were obtained with specific primers seqF-seqR (PSEP1), seqF3-seqR3 (PSEP3), seqF25-seqR25 (PSEP25) and seqF18-seqR18 (PSEP18).

REFERENCES

Collonnier C, Epert A, Mara K, Maclot F, Guyon-Debast A, Charlot F, White C, Schaefer DG, Nogue F. 2017. CRISPR-Cas9-mediated efficient directed mutagenesis and RAD51-dependent and RAD51-independent gene targeting in the moss Physcomitrella patens. *Plant Biotechnol J* **15**(1): 122-131.

Fesenko I, Seredina A, Arapidi G, Ptushenko V, Urban A, Butenko I, Kovalchuk S, Babalyan K, Knyazev A, Khazigaleeva R et al. 2016. The Physcomitrella patens Chloroplast Proteome Changes in Response to Protoplastation. *Front Plant Sci* **7**: 1661.

Goodstein DM, Shu S, Howson R, Neupane R, Hayes RD, Fazo J, Mitros T, Dirks W, Hellsten U, Putnam N et al. 2012. Phytozome: a comparative platform for green plant genomics. *Nucleic acids research* **40**(Database issue): D1178-1186.

Hiss M, Meyberg R, Westermann J, Haas FB, Schneider L, Schallenberg-Rudinger M, Ullrich KK, Rensing SA. 2017. Sexual reproduction, sporophyte development and molecular variation in the model moss Physcomitrella patens: introducing the ecotype Reute. *Plant J* **90**(3): 606-620.

Lang D, Ullrich KK, Murat F, Fuchs J, Jenkins J, Haas FB, Piednoel M, Gundlach H, Van Bel M, Meyberg R et al. 2018. The Physcomitrella patens chromosome-scale assembly reveals moss genome structure and evolution. *Plant J* **93**(3): 515-533.

McKenna A, Hanna M, Banks E, Sivachenko A, Cibulskis K, Kernytsky A, Garimella K, Altshuler D, Gabriel S, Daly M et al. 2010. The Genome Analysis Toolkit: a MapReduce framework for analyzing next-generation DNA sequencing data. *Genome Res* **20**(9): 1297-1303.

Quinlan AR, Hall IM. 2010. BEDTools: a flexible suite of utilities for comparing genomic features. *Bioinformatics* **26**(6): 841-842.
