# Supplementary material for: Distinct types of short open reading frames are translated in plant cells
Source: HighWire-hosted journal article supplement (doi:10.1101/gr.253302.119), 2019-08-06
Supplement: Supplemental_Table_S1.xlsx.xlsx [file Supplemental_Table_S1.xlsx.xlsx]

## Sheet: Sheet1
Supplemental Table S1. List of sORFs located on the moss transcripts
sORF - id of predicted transcriptable sORF
Location - genome coordinates of sORF
sORF finder index - The CI (coding index) for a given sequence
Transcripts - transcript id
Homology - species with detectable homologous sequence
Ka/Ks - The ratio of the number of nonsynonymous substitutions per nonsynonymous site (Ka) to the number of synonymous substitutions per synonymous site (Ks)
AS events - detectable AS events
Evidence of translation - evidence of translation according to MS data
sORF	Location	sORF finder index	Classification	Transcripts	Homology	Ka/Ks	AS events	Evidence of translation
Pp3c1_sORF1785	Chr01:20784776-20785010	84.2	lncRNA	Pp3c1_29179V3.1 | lncRNAs: lcl|Ppatens_Pp3c1_29179V3.1	Ceratodon,Morchantia,Sphagnum	Ceratodon:0.228,Morchantia:0.0078,Sphagnum:0.0714		+
Pp3c1_sORF1909	Chr01:21574836-21575046	50.7	CDS	Pp3c1_30360V3.1,Pp3c1_30360V3.2				+
Pp3c1_sORF3112	Chr01:27867189-27867450	92.9	five_prime_UTR	Pp3c1_39990V3.2	Arabidopsis,Ceratodon,Morchantia,Oryza,Sphagnum,Spirodela,Zea	Ceratodon:0.0331,Morchantia:0.062,Sphagnum:0.0339,Oryza:0.0094,Arabidopsis:0.3124,Zea:0.0092,Spirodela:0.2603		+
Pp3c1_sORF734	Chr01:15696718-15696880	85.9	CDS	Pp3c1_20660V3.2	Ceratodon	Ceratodon:1.4524		no
Pp3c10_sORF2639	Chr10:9652564-9652642	90.6	three_prime_UTR	Pp3c10_14160V3.2,Pp3c10_14160V3.3,Pp3c10_14160V3.1				+
Pp3c11_sORF461	Chr11:12529403-12529700	42884	five_prime_UTR	Pp3c11_18980V3.1,Pp3c11_18980V3.4			Stop codon excision	+
Pp3c11_sORF847	Chr11:14526402-14526501	99.7	CDS	Pp3c11_21830V3.2,Pp3c11_21830V3.3,Pp3c11_21830V3.4,Pp3c11_21830V3.5,Pp3c11_21830V3.1				+
Pp3c12_sORF172	Chr12:11421115-11421319	47.8	Interlaced	Pp3c12_17320V3.1,Pp3c12_17320V3.2	Ceratodon	Ceratodon:0.2016		+
Pp3c12_sORF2000	Chr12:7412080-7412143	95.7	CDS	Pp3c12_11030V3.3,Pp3c12_11030V3.1,Pp3c12_11030V3.4,Pp3c12_11030V3.2				+
Pp3c12_sORF963	Chr12:16388144-16388351	63.1	five_prime_UTR	Pp3c12_25060V3.1				+
Pp3c13_sORF2018	Chr13:7976478-7976700	77.4	Intergenic	ID=XLOC_027658|TCONS_00047327				+
Pp3c14_sORF612	Chr14:13583293-13583401	99.3	CDS	Pp3c14_20800V3.1				+
Pp3c14_sORF645	Chr14:13663545-13663626	84.9	three_prime_UTR,CDS	Pp3c14_21030V3.5				+
Pp3c15_sORF33	Chr15:10009043-10009145	98.7	CDS	Pp3c15_15290V3.4,Pp3c15_15290V3.7,Pp3c15_15290V3.14,Pp3c15_15290V3.12,Pp3c15_15290V3.1,Pp3c15_15290V3.9,Pp3c15_15290V3.3,Pp3c15_15290V3.8,Pp3c15_15290V3.11,Pp3c15_15290V3.16,Pp3c15_15290V3.2,Pp3c15_15290V3.13,Pp3c15_15290V3.5,Pp3c15_15290V3.6,Pp3c15_15290V3.10,Pp3c15_15290V3.17,Pp3c15_15290V3.15				+
Pp3c16_sORF1793	Chr16:4833501-4833558	96.9	CDS	Pp3c16_7710V3.5,Pp3c16_7710V3.3,Pp3c16_7710V3.4,Pp3c16_7710V3.2,Pp3c16_7710V3.1				+
Pp3c16_sORF2123	Chr16:6510160-6510313	90.8	Interlaced	Pp3c16_10420V3.2,Pp3c16_10420V3.1				+
Pp3c17_sORF323	Chr17:11373141-11373327	78.5	lncRNA	Pp3c17_16710V3.1 | lncRNAs: lcl|Ppatens_Pp3c17_16710V3.1				+
Pp3c18_sORF1035	Chr18:1984694-1984757	98	CDS	Pp3c18_2430V3.3,Pp3c18_2430V3.2,Pp3c18_2430V3.1				+
Pp3c18_sORF1199	Chr18:3502992-3503115	100	CDS	Pp3c18_4620V3.5,Pp3c18_4620V3.4				+
Pp3c18_sORF1228	Chr18:3609517-3609643	61.7	lncRNA	Pp3c18_4840V3.2 | lncRNAs: lcl|Ppatens_Pp3c18_4840V3.2				+
Pp3c18_sORF57	Chr18:10376370-10376493	87.6	lncRNA	Pp3c18_14350V3.2,Pp3c18_14350V3.1 | lncRNAs: lcl|Ppatens_Pp3c18_14350V3.1				+
Pp3c19_sORF1145	Chr19:346947-347100	75.3	five_prime_UTR	Pp3c19_909V3.1				+
Pp3c2_sORF2729	Chr02:25233443-25233710	73.9	five_prime_UTR	Pp3c2_37160V3.5,Pp3c2_37160V3.10			Stop codon excision	+
Pp3c20_sORF2107	Chr20:8376175-8376409	60.5	CDS	Pp3c20_12980V3.1,Pp3c20_12980V3.2				+
Pp3c20_sORF247	Chr20:10998225-10998267	91.1	CDS	Pp3c20_16710V3.3,Pp3c20_16710V3.1,Pp3c20_16710V3.5,Pp3c20_16710V3.4,Pp3c20_16710V3.6,Pp3c20_16710V3.2,Pp3c20_16710V3.7				+
Pp3c22_sORF43	Chr22:10264377-10264620	58.7	lncRNA	Pp3c22_15860V3.1,Pp3c22_15860V3.2 | lncRNAs: lcl|Ppatens_Pp3c22_15860V3.1,lcl|Ppatens_Pp3c22_15860V3.2				+
Pp3c23_sORF1096	Chr23:4181222-4181495	95.4	three_prime_UTR	Pp3c23_6210V3.2			Start codon excision	+
Pp3c23_sORF19	Chr23:10151005-10151080	93.1	CDS	Pp3c23_15070V3.1,Pp3c23_15070V3.2				+
Pp3c24_sORF1145	Chr24:4482594-4482696	97.4	three_prime_UTR	Pp3c24_6750V3.3				+
Pp3c25_sORF1000	Chr25:430121-430307	61.2	lncRNA	Pp3c25_680V3.2,Pp3c25_680V3.1 | lncRNAs: lcl|Ppatens_Pp3c25_680V3.1,lcl|Ppatens_Pp3c25_680V3.2	Ceratodon,Oryza,Sphagnum,Spirodela,Zea	Ceratodon:0.2258,Sphagnum:0.0078,Oryza:0.3907,Zea:0.3508,Spirodela:0.3712		+
Pp3c25_sORF1253	Chr25:10534806-10534633	75.2	lncRNA	lncRNAs: lcl|Ppatens_Pp3c25_14559V3.1	Ceratodon	Ceratodon:0.5125		+
Pp3c26_sORF985	Chr26:7380004-7380196	49.8	three_prime_UTR	Pp3c26_11780V3.1,Pp3c26_11780V3.4				+
Pp3c27_sORF501	Chr27:3027129-3027255	75.1	lncRNA	Pp3c27_5270V3.2 | lncRNAs: TCONS_00033399_100,CNT0033261,CNT0033260			Stop codon excision	+
Pp3c3_sORF1213	Chr03:15865135-15865390	49.1	three_prime_UTR	Pp3c3_23200V3.2,Pp3c3_23200V3.1			Start codon excision	+
Pp3c3_sORF3786	Chr03:7082083-7082185	90.9	CDS	Pp3c3_9940V3.2				+
Pp3c3_sORF507	Chr03:12360773-12361022	48.2	three_prime_UTR	Pp3c3_17800V3.3,Pp3c3_17800V3.2,Pp3c3_17800V3.4			Excision	+
Pp3c4_sORF2250	Chr04:4127381-4127510	92.5	three_prime_UTR	Pp3c4_5910V3.1				+
Pp3c4_sORF750	Chr04:13491639-13491828	47	CDS	Pp3c4_19960V3.2,Pp3c4_19960V3.1				+
Pp3c7_sORF1583	Chr07:2297334-2297382	94.7	CDS	Pp3c7_3740V3.2				+
Pp3c7_sORF2723	Chr07:811985-812102	91	CDS	Pp3c7_1350V3.1,Pp3c7_1350V3.3,Pp3c7_1350V3.2				+
Pp3c8_sORF1113	Chr08:16898845-16899001	89.4	CDS	Pp3c8_24200V3.1,Pp3c8_24200V3.2				+
Pp3c8_sORF1813	Chr08:5886734-5886815	98.9	three_prime_UTR	Pp3c8_9550V3.2				+
Pp3c8_sORF2026	Chr08:7496462-7496519	89.9	CDS	Pp3c8_11630V3.2,Pp3c8_11630V3.1,Pp3c8_11630V3.3				+
Pp3c8_sORF2447	Chr08:963806-963905	91.7	CDS	Pp3c8_1990V3.1,Pp3c8_1990V3.2				+
Pp3c9_sORF1448	Chr09:2240399-2240567	91.5	five_prime_UTR	Pp3c9_3890V3.2				+
Pp3c9_sORF1544	Chr09:13962221-13962346	59.2	lncRNA	Pp3c9_20640̳.1				+
Pp3c1_sORF1	Chr01:10000753-10000807	97.7	CDS	Pp3c1_13720V3.1,Pp3c1_13720V3.2				no
Pp3c1_sORF10	Chr01:10068497-10068620	75	five_prime_UTR	Pp3c1_13800V3.2,Pp3c1_13800V3.3			Start codon excision	no
Pp3c1_sORF100	Chr01:11088475-11088517	98.9	CDS	Pp3c1_14750V3.4,Pp3c1_14750V3.2,Pp3c1_14750V3.5,Pp3c1_14750V3.3,Pp3c1_14750V3.1,Pp3c1_14750V3.6				no
Pp3c1_sORF1000	Chr01:16726058-16726154	84	CDS	Pp3c1_22560V3.2				no
Pp3c1_sORF1001	Chr01:16727036-16727228	69.6	CDS	Pp3c1_22560V3.2				no
Pp3c1_sORF1002	Chr01:16727654-16727708	98.1	CDS	Pp3c1_22560V3.2				no
Pp3c1_sORF1003	Chr01:16728335-16728368	98.3	CDS	Pp3c1_22560V3.2				no
Pp3c1_sORF1004	Chr01:16728755-16728944	59.4	three_prime_UTR	Pp3c1_22560V3.2				no
Pp3c1_sORF1005	Chr01:16735027-16735213	98.3	CDS	Pp3c1_22570V3.1				no
Pp3c1_sORF1006	Chr01:16747930-16748044	96.9	CDS	Pp3c1_22590V3.1,Pp3c1_22590V3.2	Ceratodon	Ceratodon:0.5588		no
Pp3c1_sORF1007	Chr01:16751527-16751632	97	CDS	Pp3c1_22600V3.1				no
Pp3c1_sORF1008	Chr01:16752190-16752256	99.8	CDS	Pp3c1_22600V3.1				no
Pp3c1_sORF1009	Chr01:16752615-16752786	99.9	CDS	Pp3c1_22600V3.1	Ceratodon,Sphagnum	Ceratodon:2.7979,Sphagnum:3.2053		no
Pp3c1_sORF101	Chr01:11096824-11096911	85.3	five_prime_UTR	Pp3c1_14760V3.1,Pp3c1_14760V3.2				no
Pp3c1_sORF1010	Chr01:16753311-16753362	94.8	CDS	Pp3c1_22600V3.1				no
Pp3c1_sORF1011	Chr01:16760466-16760502	99	CDS	Pp3c1_22620V3.3				no
Pp3c1_sORF1012	Chr01:16765100-16765241	92.9	three_prime_UTR	Pp3c1_22620V3.3				no
Pp3c1_sORF1013	Chr01:16765565-16765682	94.4	three_prime_UTR	Pp3c1_22620V3.3				no
Pp3c1_sORF1014	Chr01:16766567-16766624	99.5	CDS	Pp3c1_22640V3.1,Pp3c1_22640V3.2				no
Pp3c1_sORF1015	Chr01:16766684-16766759	100	CDS	Pp3c1_22640V3.1,Pp3c1_22640V3.2				no
Pp3c1_sORF1016	Chr01:16768171-16768255	98.9	CDS	Pp3c1_22640V3.1,Pp3c1_22640V3.2				no
Pp3c1_sORF1017	Chr01:16769854-16769914	93.7	CDS	Pp3c1_22640V3.1,Pp3c1_22640V3.2				no
Pp3c1_sORF1018	Chr01:16773176-16773266	97.7	three_prime_UTR	Pp3c1_22650V3.2,Pp3c1_22650V3.1				no
Pp3c1_sORF1019	Chr01:16699649-16699697	99.4	CDS	Pp3c1_22490V3.1,Pp3c1_22490V3.2				no
Pp3c1_sORF102	Chr01:10932727-10932874	81.7	five_prime_UTR	Pp3c1_14630V3.1				no
Pp3c1_sORF1020	Chr01:16702085-16702154	87.7	five_prime_UTR	Pp3c1_22490V3.1,Pp3c1_22490V3.2				no
Pp3c1_sORF1021	Chr01:16706790-16706988	81.9	three_prime_UTR	Pp3c1_22510V3.3,Pp3c1_22510V3.2,Pp3c1_22510V3.1				no
Pp3c1_sORF1022	Chr01:16707032-16707119	91.9	CDS	Pp3c1_22510V3.3,Pp3c1_22510V3.2,Pp3c1_22510V3.1				no
Pp3c1_sORF1023	Chr01:16711423-16711477	98.3	CDS	Pp3c1_22520V3.2,Pp3c1_22520V3.1				no
Pp3c1_sORF1024	Chr01:16711486-16711600	99.2	CDS	Pp3c1_22520V3.2,Pp3c1_22520V3.1	Ceratodon,Sphagnum	Ceratodon:2.5585,Sphagnum:2.5991		no
Pp3c1_sORF1025	Chr01:16713661-16713745	94.1	Interlaced	Pp3c1_22540V3.2,Pp3c1_22540V3.1				no
Pp3c1_sORF1026	Chr01:16716393-16716456	91.1	CDS	Pp3c1_22540V3.2,Pp3c1_22540V3.1				no
Pp3c1_sORF1027	Chr01:16817-17099	61.4	five_prime_UTR	Pp3c1_40V3.2				no
Pp3c1_sORF1028	Chr01:16820138-16820171	97.4	lncRNA	Pp3c1_22720V3.2 | lncRNAs: lcl|Ppatens_Pp3c1_22720V3.2			Stop codon excision	no
Pp3c1_sORF1029	Chr01:16820926-16820965	95.4	lncRNA	Pp3c1_22720V3.3 | lncRNAs: lcl|Ppatens_Pp3c1_22720V3.3				no
Pp3c1_sORF103	Chr01:11115825-11115921	90.1	CDS	Pp3c1_14780V3.1	Ceratodon	Ceratodon:0.5754		no
Pp3c1_sORF1030	Chr01:16824367-16824469	73.3	five_prime_UTR	Pp3c1_22730V3.2			Excision,Stop codon excision	no
Pp3c1_sORF1031	Chr01:16824850-16825066	97.9	CDS	Pp3c1_22750V3.5	Ceratodon	Ceratodon:2.3257		no
Pp3c1_sORF1032	Chr01:16824897-16824981	86.8	CDS	Pp3c1_22750V3.5				no
Pp3c1_sORF1033	Chr01:16825017-16825116	83.1	CDS	Pp3c1_22750V3.5				no
Pp3c1_sORF1034	Chr01:16831785-16831845	97.4	CDS	Pp3c1_22750V3.5				no
Pp3c1_sORF1035	Chr01:16777044-16777215	55.5	three_prime_UTR	Pp3c1_22690V3.5,Pp3c1_22690V3.6,Pp3c1_22690V3.8,Pp3c1_22690V3.9,Pp3c1_22690V3.1,Pp3c1_22690V3.4,Pp3c1_22690V3.10,Pp3c1_22690V3.3,Pp3c1_22690V3.2,Pp3c1_22690V3.7				no
Pp3c1_sORF1036	Chr01:16778296-16778374	94	three_prime_UTR	Pp3c1_22690V3.10			Excision	no
Pp3c1_sORF1037	Chr01:16779578-16779614	99.4	CDS	Pp3c1_22690V3.10				no
Pp3c1_sORF1038	Chr01:16818446-16818629	66.7	CDS	Pp3c1_22710V3.1,Pp3c1_22710V3.3,Pp3c1_22710V3.2	Ceratodon,Sphagnum	Ceratodon:1.7378,Sphagnum:1.5591		no
Pp3c1_sORF1039	Chr01:16819442-16819475	99.8	five_prime_UTR	Pp3c1_22710V3.1,Pp3c1_22710V3.3,Pp3c1_22710V3.2				no
Pp3c1_sORF104	Chr01:10935161-10935269	75.7	five_prime_UTR	Pp3c1_14640V3.1				no
Pp3c1_sORF1040	Chr01:16820868-16820961	93.9	three_prime_UTR	Pp3c1_22730V3.2				no
Pp3c1_sORF1041	Chr01:16823355-16823433	85.7	five_prime_UTR	Pp3c1_22730V3.1,Pp3c1_22730V3.2				no
Pp3c1_sORF1042	Chr01:16857965-16858064	98.4	three_prime_UTR	Pp3c1_22810V3.1				no
Pp3c1_sORF1043	Chr01:16858348-16858417	87.7	three_prime_UTR	Pp3c1_22810V3.1				no
Pp3c1_sORF1044	Chr01:16859468-16859546	93.4	three_prime_UTR	Pp3c1_22810V3.1				no
Pp3c1_sORF1045	Chr01:16951512-16951590	85.6	five_prime_UTR	Pp3c1_22930V3.3			Excision	no
Pp3c1_sORF1046	Chr01:16952591-16952630	97.3	CDS	Pp3c1_22930V3.3,Pp3c1_22930V3.1,Pp3c1_22930V3.2				no
Pp3c1_sORF1047	Chr01:16953449-16953557	90.3	CDS	Pp3c1_22930V3.3,Pp3c1_22930V3.1,Pp3c1_22930V3.2				no
Pp3c1_sORF1048	Chr01:16906768-16906828	94	CDS	Pp3c1_22880V3.1				no
Pp3c1_sORF1049	Chr01:16907661-16907790	89.9	CDS	Pp3c1_22880V3.1			Start codon excision	no
Pp3c1_sORF105	Chr01:10935540-10935690	84.3	five_prime_UTR	Pp3c1_14640V3.1				no
Pp3c1_sORF1050	Chr01:16908945-16908987	92.4	Interlaced	Pp3c1_22880V3.1				no
Pp3c1_sORF1051	Chr01:16931877-16932042	56.5	CDS	Pp3c1_22900V3.1			Excision	no
Pp3c1_sORF1052	Chr01:16932099-16932162	88	CDS	Pp3c1_22900V3.1			Excision	no
Pp3c1_sORF1053	Chr01:17030099-17030204	90	five_prime_UTR	Pp3c1_23010V3.3,Pp3c1_23010V3.8			Excision	no
Pp3c1_sORF1054	Chr01:17037046-17037109	90.3	three_prime_UTR	Pp3c1_23010V3.3,Pp3c1_23010V3.8,Pp3c1_23010V3.2,Pp3c1_23010V3.1				no
Pp3c1_sORF1055	Chr01:17037422-17037539	97.8	three_prime_UTR	Pp3c1_23010V3.3,Pp3c1_23010V3.8,Pp3c1_23010V3.2,Pp3c1_23010V3.1				no
Pp3c1_sORF1056	Chr01:16974333-16974372	96.5	three_prime_UTR	Pp3c1_22950V3.4,Pp3c1_22950V3.11,Pp3c1_22950V3.12,Pp3c1_22950V3.6,Pp3c1_22950V3.9,Pp3c1_22950V3.13,Pp3c1_22950V3.5,Pp3c1_22950V3.15,Pp3c1_22950V3.14,Pp3c1_22950V3.10,Pp3c1_22950V3.17,Pp3c1_22950V3.8			Excision	no
Pp3c1_sORF1057	Chr01:16979018-16979054	97.4	CDS	Pp3c1_22950V3.4,Pp3c1_22950V3.16,Pp3c1_22950V3.11,Pp3c1_22950V3.12,Pp3c1_22950V3.1,Pp3c1_22950V3.6,Pp3c1_22950V3.9,Pp3c1_22950V3.13,Pp3c1_22950V3.5,Pp3c1_22950V3.15,Pp3c1_22950V3.14,Pp3c1_22950V3.10,Pp3c1_22950V3.17,Pp3c1_22950V3.8				no
Pp3c1_sORF1058	Chr01:16979212-16979263	95.1	five_prime_UTR	Pp3c1_22950V3.4,Pp3c1_22950V3.16,Pp3c1_22950V3.11,Pp3c1_22950V3.12,Pp3c1_22950V3.1,Pp3c1_22950V3.6,Pp3c1_22950V3.9,Pp3c1_22950V3.13,Pp3c1_22950V3.5,Pp3c1_22950V3.15,Pp3c1_22950V3.14,Pp3c1_22950V3.10,Pp3c1_22950V3.17,Pp3c1_22950V3.8				no
Pp3c1_sORF1059	Chr01:16984618-16984864	81.4	Interlaced	Pp3c1_22970V3.2				no
Pp3c1_sORF106	Chr01:10935772-10935811	95.4	five_prime_UTR	Pp3c1_14640V3.1				no
Pp3c1_sORF1060	Chr01:17097196-17097265	97.3	CDS	Pp3c1_23150V3.3,Pp3c1_23150V3.1,Pp3c1_23150V3.4,Pp3c1_23150V3.6,Pp3c1_23150V3.8,Pp3c1_23150V3.14,Pp3c1_23150V3.12,Pp3c1_23150V3.13,Pp3c1_23150V3.9,Pp3c1_23150V3.7,Pp3c1_23150V3.2,Pp3c1_23150V3.5,Pp3c1_23150V3.10,Pp3c1_23150V3.11,Pp3c1_23150V3.15				no
Pp3c1_sORF1061	Chr01:17098263-17098398	73.8	CDS	Pp3c1_23150V3.3,Pp3c1_23150V3.1,Pp3c1_23150V3.4,Pp3c1_23150V3.6,Pp3c1_23150V3.8,Pp3c1_23150V3.14,Pp3c1_23150V3.12,Pp3c1_23150V3.13,Pp3c1_23150V3.9,Pp3c1_23150V3.7,Pp3c1_23150V3.2,Pp3c1_23150V3.5,Pp3c1_23150V3.10,Pp3c1_23150V3.11,Pp3c1_23150V3.15				no
Pp3c1_sORF1062	Chr01:17101553-17101604	99.8	CDS	Pp3c1_23150V3.14				no
Pp3c1_sORF1063	Chr01:17102011-17102044	93.2	CDS	Pp3c1_23160V3.2				no
Pp3c1_sORF1064	Chr01:17102427-17102541	87.6	CDS	Pp3c1_23160V3.2	Morchantia	Morchantia:0.731		no
Pp3c1_sORF1065	Chr01:17103840-17103933	100	CDS	Pp3c1_23160V3.2				no
Pp3c1_sORF1066	Chr01:17104349-17104418	99.8	CDS	Pp3c1_23160V3.2				no
Pp3c1_sORF1067	Chr01:17027118-17027196	95.7	five_prime_UTR	Pp3c1_23000V3.1,Pp3c1_23000V3.2				no
Pp3c1_sORF1068	Chr01:17110740-17110905	100	CDS	Pp3c1_23170V3.1,Pp3c1_23170V3.2	Ceratodon	Ceratodon:3.4975		no
Pp3c1_sORF1069	Chr01:17111121-17111385	97.7	CDS	Pp3c1_23170V3.1,Pp3c1_23170V3.2				no
Pp3c1_sORF107	Chr01:10935677-10935875	49.6	five_prime_UTR	Pp3c1_14640V3.1				no
Pp3c1_sORF1070	Chr01:17112498-17112531	96	CDS	Pp3c1_23170V3.1,Pp3c1_23170V3.2				no
Pp3c1_sORF1071	Chr01:17127339-17127459	88	CDS	Pp3c1_23200V3.2,Pp3c1_23200V3.1				no
Pp3c1_sORF1072	Chr01:17060820-17060865	95.3	three_prime_UTR	Pp3c1_23040V3.3,Pp3c1_23040V3.2			Start codon excision	no
Pp3c1_sORF1073	Chr01:17037432-17037531	98.1	CDS	Pp3c1_23010V3.1				no
Pp3c1_sORF1074	Chr01:17064315-17064396	94.5	CDS	Pp3c1_23040V3.3,Pp3c1_23040V3.2,Pp3c1_23040V3.1				no
Pp3c1_sORF1075	Chr01:17041298-17041424	70.5	CDS	Pp3c1_23020V3.2				no
Pp3c1_sORF1076	Chr01:17177158-17177218	95.4	five_prime_UTR	Pp3c1_23250V3.1				no
Pp3c1_sORF1077	Chr01:17178813-17178876	98.8	CDS	Pp3c1_23250V3.2,Pp3c1_23250V3.1				no
Pp3c1_sORF1078	Chr01:17181909-17182026	76.9	CDS	Pp3c1_23250V3.2,Pp3c1_23250V3.1	Ceratodon	Ceratodon:0.7472		no
Pp3c1_sORF1079	Chr01:17121014-17121080	99.2	three_prime_UTR	Pp3c1_23190V3.4,Pp3c1_23190V3.10,Pp3c1_23190V3.5,Pp3c1_23190V3.1,Pp3c1_23190V3.9,Pp3c1_23190V3.2,Pp3c1_23190V3.3,Pp3c1_23190V3.8,Pp3c1_23190V3.11,Pp3c1_23190V3.7,Pp3c1_23190V3.6				no
Pp3c1_sORF108	Chr01:10935738-10935984	55.1	five_prime_UTR	Pp3c1_14640V3.1				no
Pp3c1_sORF1080	Chr01:17121514-17121604	82.1	three_prime_UTR	Pp3c1_23190V3.4,Pp3c1_23190V3.10,Pp3c1_23190V3.1,Pp3c1_23190V3.9,Pp3c1_23190V3.11			Start codon excision	no
Pp3c1_sORF1081	Chr01:17204127-17204334	64.1	five_prime_UTR	Pp3c1_23300V3.11				no
Pp3c1_sORF1082	Chr01:17204649-17204736	94.2	five_prime_UTR	Pp3c1_23300V3.11				no
Pp3c1_sORF1083	Chr01:17204854-17205010	86.4	five_prime_UTR	Pp3c1_23300V3.11				no
Pp3c1_sORF1084	Chr01:17207879-17207921	98.4	CDS	Pp3c1_23300V3.5,Pp3c1_23300V3.4,Pp3c1_23300V3.6,Pp3c1_23300V3.3,Pp3c1_23300V3.8,Pp3c1_23300V3.1,Pp3c1_23300V3.2,Pp3c1_23300V3.10,Pp3c1_23300V3.11,Pp3c1_23300V3.9,Pp3c1_23300V3.7				no
Pp3c1_sORF1085	Chr01:17207948-17207987	95.7	CDS	Pp3c1_23300V3.5,Pp3c1_23300V3.4,Pp3c1_23300V3.6,Pp3c1_23300V3.3,Pp3c1_23300V3.8,Pp3c1_23300V3.1,Pp3c1_23300V3.2,Pp3c1_23300V3.10,Pp3c1_23300V3.11,Pp3c1_23300V3.9,Pp3c1_23300V3.7				no
Pp3c1_sORF1086	Chr01:17210646-17210688	91	CDS	Pp3c1_23300V3.5,Pp3c1_23300V3.4,Pp3c1_23300V3.6,Pp3c1_23300V3.3,Pp3c1_23300V3.8,Pp3c1_23300V3.1,Pp3c1_23300V3.2,Pp3c1_23300V3.10,Pp3c1_23300V3.11,Pp3c1_23300V3.9,Pp3c1_23300V3.7				no
Pp3c1_sORF1087	Chr01:17212709-17212973	100	CDS	Pp3c1_23330V3.1				no
Pp3c1_sORF1088	Chr01:17134092-17134137	97.4	CDS	Pp3c1_23220V3.2,Pp3c1_23220V3.1,Pp3c1_23220V3.3				no
Pp3c1_sORF1089	Chr01:17134530-17134587	95.2	CDS	Pp3c1_23220V3.2,Pp3c1_23220V3.1,Pp3c1_23220V3.3				no
Pp3c1_sORF109	Chr01:10946323-10946428	93.2	three_prime_UTR	Pp3c1_14670V3.4			Excision	no
Pp3c1_sORF1090	Chr01:17134845-17134989	100	CDS	Pp3c1_23220V3.2,Pp3c1_23220V3.1,Pp3c1_23220V3.3	Ceratodon	Ceratodon:3.0099		no
Pp3c1_sORF1091	Chr01:17237425-17237557	82.3	CDS	Pp3c1_23370V3.1,Pp3c1_23370V3.2				no
Pp3c1_sORF1092	Chr01:17237953-17238013	100	CDS	Pp3c1_23370V3.1,Pp3c1_23370V3.2				no
Pp3c1_sORF1093	Chr01:17238226-17238424	99.6	CDS	Pp3c1_23370V3.1,Pp3c1_23370V3.2	Arabidopsis,Ceratodon	Ceratodon:3.2132,Arabidopsis:0.6773		no
Pp3c1_sORF1094	Chr01:17238427-17238523	98.1	CDS	Pp3c1_23370V3.1,Pp3c1_23370V3.2				no
Pp3c1_sORF1095	Chr01:17255055-17255136	86.3	lncRNA	ID=XLOC_029609|TCONS_00050680,ID=XLOC_029609|TCONS_00050679 | lncRNAs: TCONS_00056961_100,TCONS_00056962_100				no
Pp3c1_sORF1096	Chr01:17187275-17187398	77.5	CDS	Pp3c1_23260V3.2,Pp3c1_23260V3.1	Ceratodon	Ceratodon:1.2268		no
Pp3c1_sORF1097	Chr01:17187372-17187471	99.7	CDS	Pp3c1_23260V3.2,Pp3c1_23260V3.1	Ceratodon	Ceratodon:0.9862		no
Pp3c1_sORF1098	Chr01:17283872-17283989	80.2	five_prime_UTR	Pp3c1_23426V3.1				no
Pp3c1_sORF1099	Chr01:17284184-17284247	96.5	CDS	Pp3c1_23426V3.1				no
Pp3c1_sORF11	Chr01:10069429-10069555	59.4	CDS	Pp3c1_13800V3.1,Pp3c1_13800V3.2,Pp3c1_13800V3.3				no
Pp3c1_sORF110	Chr01:10946387-10946609	94.9	Interlaced	Pp3c1_14670V3.4			Stop codon excision	no
Pp3c1_sORF1100	Chr01:17284304-17284382	91.5	CDS	Pp3c1_23426V3.1				no
Pp3c1_sORF1101	Chr01:17287794-17287965	45.8	Interlaced	Pp3c1_23460V3.1,Pp3c1_23460V3.2				no
Pp3c1_sORF1102	Chr01:17212976-17213117	98	CDS	Pp3c1_23331V3.1				no
Pp3c1_sORF1103	Chr01:17219239-17219464	57.1	Intergenic	ID=XLOC_029504|TCONS_00050476				no
Pp3c1_sORF1104	Chr01:17321822-17321990	87.5	five_prime_UTR	Pp3c1_23590V3.1				no
Pp3c1_sORF1105	Chr01:17321973-17322093	98.1	five_prime_UTR	Pp3c1_23590V3.1				no
Pp3c1_sORF1106	Chr01:17323816-17324023	60.5	three_prime_UTR	Pp3c1_23590V3.2				no
Pp3c1_sORF1107	Chr01:17245429-17245516	86.7	CDS	Pp3c1_23380V3.3,Pp3c1_23380V3.6,Pp3c1_23380V3.2,Pp3c1_23380V3.5,Pp3c1_23380V3.7,Pp3c1_23380V3.1,Pp3c1_23380V3.4				no
Pp3c1_sORF1108	Chr01:17245561-17245612	96.2	CDS	Pp3c1_23380V3.3,Pp3c1_23380V3.6,Pp3c1_23380V3.2,Pp3c1_23380V3.5,Pp3c1_23380V3.7,Pp3c1_23380V3.1,Pp3c1_23380V3.4				no
Pp3c1_sORF1109	Chr01:17327543-17327657	100	lncRNA	Pp3c1_23600V3.2,Pp3c1_23600V3.1,Pp3c1_23600V3.3 | lncRNAs: lcl|Ppatens_Pp3c1_23600V3.1,lcl|Ppatens_Pp3c1_23600V3.2,lcl|Ppatens_Pp3c1_23600V3.3				no
Pp3c1_sORF111	Chr01:10947675-10947801	100	CDS	Pp3c1_14670V3.2,Pp3c1_14670V3.4,Pp3c1_14670V3.3,Pp3c1_14670V3.5,Pp3c1_14670V3.1				no
Pp3c1_sORF1110	Chr01:17246718-17246781	99.4	CDS	Pp3c1_23380V3.3,Pp3c1_23380V3.6,Pp3c1_23380V3.2,Pp3c1_23380V3.5,Pp3c1_23380V3.7,Pp3c1_23380V3.1,Pp3c1_23380V3.4				no
Pp3c1_sORF1111	Chr01:17327778-17327919	78.4	lncRNA	Pp3c1_23600V3.2,Pp3c1_23600V3.1,Pp3c1_23600V3.3 | lncRNAs: lcl|Ppatens_Pp3c1_23600V3.1,lcl|Ppatens_Pp3c1_23600V3.2,lcl|Ppatens_Pp3c1_23600V3.3				no
Pp3c1_sORF1112	Chr01:17249898-17249988	92.9	five_prime_UTR	Pp3c1_23380V3.7				no
Pp3c1_sORF1113	Chr01:17344862-17345021	64.3	CDS	Pp3c1_23611V3.1,Pp3c1_23610V3.1	Ceratodon	Ceratodon:1.9827		no
Pp3c1_sORF1114	Chr01:17345102-17345297	49.3	three_prime_UTR	Pp3c1_23611V3.1,Pp3c1_23610V3.1				no
Pp3c1_sORF1115	Chr01:17268682-17268727	97.7	three_prime_UTR	Pp3c1_23410V3.2				no
Pp3c1_sORF1116	Chr01:17270061-17270196	71.6	five_prime_UTR	Pp3c1_23410V3.2				no
Pp3c1_sORF1117	Chr01:17272425-17272461	99	CDS	Pp3c1_23410V3.3,Pp3c1_23410V3.1				no
Pp3c1_sORF1118	Chr01:17274080-17274206	86.8	CDS	Pp3c1_23410V3.3,Pp3c1_23410V3.1				no
Pp3c1_sORF1119	Chr01:17274233-17274374	91.2	CDS	Pp3c1_23410V3.3,Pp3c1_23410V3.1				no
Pp3c1_sORF112	Chr01:10951870-10952113	36.3	five_prime_UTR	Pp3c1_14670V3.4,Pp3c1_14670V3.2,Pp3c1_14670V3.1,Pp3c1_14670V3.3				no
Pp3c1_sORF1120	Chr01:17283674-17283821	92.4	lncRNA	ID=XLOC_029665|TCONS_00050798 | lncRNAs: CNT0034581				no
Pp3c1_sORF1121	Chr01:17288874-17289045	100	Interlaced	Pp3c1_23490V3.1				no
Pp3c1_sORF1122	Chr01:17290253-17290373	90.4	three_prime_UTR	Pp3c1_23490V3.2			Stop codon excision	no
Pp3c1_sORF1123	Chr01:17290945-17291047	74.9	three_prime_UTR	Pp3c1_23490V3.2			Start codon excision	no
Pp3c1_sORF1124	Chr01:17372959-17373031	99.7	CDS	Pp3c1_23670V3.1,Pp3c1_23670V3.3,Pp3c1_23670V3.2				no
Pp3c1_sORF1125	Chr01:17292029-17292221	94.2	CDS	Pp3c1_23490V3.1,Pp3c1_23490V3.2				no
Pp3c1_sORF1126	Chr01:17292869-17292968	84.4	five_prime_UTR	Pp3c1_23490V3.1,Pp3c1_23490V3.2	Ceratodon	Ceratodon:0.0967		no
Pp3c1_sORF1127	Chr01:17374517-17374643	84.3	three_prime_UTR	Pp3c1_23670V3.1,Pp3c1_23670V3.3,Pp3c1_23670V3.2	Ceratodon	Ceratodon:0.1344		no
Pp3c1_sORF1128	Chr01:17300118-17300391	81.1	CDS	Pp3c1_23490V3.2				no
Pp3c1_sORF1129	Chr01:17304038-17304107	99.7	CDS	Pp3c1_23530V3.5,Pp3c1_23530V3.3,Pp3c1_23530V3.2,Pp3c1_23530V3.1,Pp3c1_23530V3.4				no
Pp3c1_sORF113	Chr01:10952028-10952172	71.2	five_prime_UTR	Pp3c1_14670V3.1,Pp3c1_14670V3.3				no
Pp3c1_sORF1130	Chr01:17306632-17306713	98.7	CDS	Pp3c1_23530V3.5,Pp3c1_23530V3.3,Pp3c1_23530V3.2,Pp3c1_23530V3.1,Pp3c1_23530V3.4				no
Pp3c1_sORF1131	Chr01:17307052-17307193	79.2	five_prime_UTR	Pp3c1_23530V3.5,Pp3c1_23530V3.3,Pp3c1_23530V3.2,Pp3c1_23530V3.1,Pp3c1_23530V3.4				no
Pp3c1_sORF1132	Chr01:17310022-17310055	100	lncRNA	Pp3c1_23558V3.2,Pp3c1_23558V3.1 | lncRNAs: lcl|Ppatens_Pp3c1_23558V3.1,lcl|Ppatens_Pp3c1_23558V3.2,CNT0034580				no
Pp3c1_sORF1133	Chr01:17310030-17310147	69.4	lncRNA	Pp3c1_23558V3.2,Pp3c1_23558V3.1 | lncRNAs: lcl|Ppatens_Pp3c1_23558V3.1,lcl|Ppatens_Pp3c1_23558V3.2,CNT0034580				no
Pp3c1_sORF1134	Chr01:17310083-17310284	64	lncRNA	Pp3c1_23558V3.2,Pp3c1_23558V3.1 | lncRNAs: lcl|Ppatens_Pp3c1_23558V3.1,lcl|Ppatens_Pp3c1_23558V3.2,CNT0034580				no
Pp3c1_sORF1135	Chr01:17310530-17310596	98.3	lncRNA	Pp3c1_23558V3.2,Pp3c1_23558V3.3,Pp3c1_23558V3.1 | lncRNAs: lcl|Ppatens_Pp3c1_23558V3.1,lcl|Ppatens_Pp3c1_23558V3.2,lcl|Ppatens_Pp3c1_23558V3.3,CNT0034580				no
Pp3c1_sORF1136	Chr01:17392473-17392584	98.1	CDS	Pp3c1_23700V3.1,Pp3c1_23700V3.2				no
Pp3c1_sORF1137	Chr01:17392662-17392908	96.6	CDS	Pp3c1_23700V3.1,Pp3c1_23700V3.2				no
Pp3c1_sORF1138	Chr01:17392953-17393100	96.2	CDS	Pp3c1_23700V3.1,Pp3c1_23700V3.2				no
Pp3c1_sORF1139	Chr01:17312230-17312452	42.9	lncRNA	Pp3c1_23558V3.2,Pp3c1_23558V3.3,Pp3c1_23558V3.1 | lncRNAs: lcl|Ppatens_Pp3c1_23558V3.1,lcl|Ppatens_Pp3c1_23558V3.2,lcl|Ppatens_Pp3c1_23558V3.3,CNT0034580				no
Pp3c1_sORF114	Chr01:11162268-11162490	99.8	CDS	Pp3c1_14800V3.1,Pp3c1_14800V3.2				no
Pp3c1_sORF1140	Chr01:17321706-17321766	98.4	lncRNA	Pp3c1_23581V3.1 | lncRNAs: lcl|Ppatens_Pp3c1_23581V3.1				no
Pp3c1_sORF1141	Chr01:17414291-17414339	99.4	five_prime_UTR	Pp3c1_23700V3.2				no
Pp3c1_sORF1142	Chr01:17416583-17416709	83.9	three_prime_UTR	Pp3c1_23750V3.4,Pp3c1_23750V3.2,Pp3c1_23750V3.3	Ceratodon,Sphagnum	Ceratodon:0.1539,Sphagnum:0.2475	Start codon excision	no
Pp3c1_sORF1143	Chr01:17367404-17367569	78.8	lncRNA	Pp3c1_23620V3.1,Pp3c1_23620V3.2,Pp3c1_23620V3.3 | lncRNAs: lcl|Ppatens_Pp3c1_23620V3.3				no
Pp3c1_sORF1144	Chr01:17367569-17367644	95.4	lncRNA	Pp3c1_23620V3.1,Pp3c1_23620V3.2,Pp3c1_23620V3.3 | lncRNAs: lcl|Ppatens_Pp3c1_23620V3.3				no
Pp3c1_sORF1145	Chr01:17367950-17368118	48.1	lncRNA	Pp3c1_23620V3.3 | lncRNAs: lcl|Ppatens_Pp3c1_23620V3.3			Start codon excision,Stop codon excision	no
Pp3c1_sORF1146	Chr01:17368479-17368593	94.1	lncRNA	Pp3c1_23620V3.3 | lncRNAs: lcl|Ppatens_Pp3c1_23620V3.3			Stop codon excision	no
Pp3c1_sORF1147	Chr01:17368988-17369237	64.6	lncRNA	Pp3c1_23620V3.3 | lncRNAs: lcl|Ppatens_Pp3c1_23620V3.3			Excision	no
Pp3c1_sORF1148	Chr01:17369378-17369495	71.5	CDS	Pp3c1_23620V3.1,Pp3c1_23620V3.2				no
Pp3c1_sORF1149	Chr01:17369534-17369633	98.4	CDS	Pp3c1_23620V3.1,Pp3c1_23620V3.2				no
Pp3c1_sORF115	Chr01:11163591-11163819	100	CDS	Pp3c1_14800V3.1,Pp3c1_14800V3.2	Ceratodon	Ceratodon:1.0524		no
Pp3c1_sORF1150	Chr01:17455020-17455227	90	Intergenic	ID=XLOC_029600|TCONS_00050661				no
Pp3c1_sORF1151	Chr01:17377371-17377428	99.3	three_prime_UTR	Pp3c1_23680V3.3,Pp3c1_23680V3.1,Pp3c1_23680V3.2,Pp3c1_23680V3.4				no
Pp3c1_sORF1152	Chr01:17368187-17368220	98.7	lncRNA	Pp3c1_23620V3.1,Pp3c1_23620V3.2,Pp3c1_23620V3.3 | lncRNAs: lcl|Ppatens_Pp3c1_23620V3.3				no
Pp3c1_sORF1153	Chr01:17368516-17368690	48.7	lncRNA	Pp3c1_23620V3.3 | lncRNAs: lcl|Ppatens_Pp3c1_23620V3.3	Morchantia,Oryza,Selaginella,Sphagnum,Spirodela	Morchantia:0.1923,Sphagnum:0.0573,Oryza:0.2069,Spirodela:0.1352,Selaginella:0.128	Start codon excision,Stop codon excision	no
Pp3c1_sORF1154	Chr01:17380176-17380314	95.9	five_prime_UTR	Pp3c1_23680V3.3,Pp3c1_23680V3.1,Pp3c1_23680V3.2,Pp3c1_23680V3.4				no
Pp3c1_sORF1155	Chr01:17380123-17380318	73.7	five_prime_UTR	Pp3c1_23680V3.3,Pp3c1_23680V3.1,Pp3c1_23680V3.2,Pp3c1_23680V3.4				no
Pp3c1_sORF1156	Chr01:17480663-17480708	91.7	three_prime_UTR	Pp3c1_23850V3.5				no
Pp3c1_sORF1157	Chr01:17529-17742	58	five_prime_UTR	Pp3c1_40V3.2				no
Pp3c1_sORF1158	Chr01:17451259-17451313	92.4	CDS	Pp3c1_23790V3.2				no
Pp3c1_sORF1159	Chr01:17452331-17452466	68.7	CDS	Pp3c1_23790V3.2				no
Pp3c1_sORF116	Chr01:11163858-11163891	97.2	CDS	Pp3c1_14800V3.1,Pp3c1_14800V3.2				no
Pp3c1_sORF1160	Chr01:17462198-17462270	98.7	CDS	Pp3c1_23810V3.3,Pp3c1_23810V3.5				no
Pp3c1_sORF1161	Chr01:17462421-17462457	99	CDS	Pp3c1_23810V3.3,Pp3c1_23810V3.5				no
Pp3c1_sORF1162	Chr01:17466027-17466078	99.5	five_prime_UTR,CDS	Pp3c1_23810V3.3				no
Pp3c1_sORF1163	Chr01:17466562-17466640	98.7	five_prime_UTR	Pp3c1_23810V3.3				no
Pp3c1_sORF1164	Chr01:17467665-17467755	90.1	three_prime_UTR	Pp3c1_23830V3.1,Pp3c1_23830V3.3,Pp3c1_23830V3.5,Pp3c1_23830V3.4,Pp3c1_23830V3.2,Pp3c1_23830V3.6				no
Pp3c1_sORF1165	Chr01:17550225-17550486	90	CDS	Pp3c1_23870V3.1,Pp3c1_23870V3.2				no
Pp3c1_sORF1166	Chr01:17469535-17469568	97	three_prime_UTR	Pp3c1_23830V3.9,Pp3c1_23830V3.16,Pp3c1_23830V3.7,Pp3c1_23830V3.14,Pp3c1_23830V3.13,Pp3c1_23830V3.10,Pp3c1_23830V3.8,Pp3c1_23830V3.11,Pp3c1_23830V3.15,Pp3c1_23830V3.12			Excision	no
Pp3c1_sORF1167	Chr01:17469745-17469868	79.7	three_prime_UTR	Pp3c1_23830V3.9,Pp3c1_23830V3.16,Pp3c1_23830V3.7,Pp3c1_23830V3.14,Pp3c1_23830V3.13,Pp3c1_23830V3.10,Pp3c1_23830V3.8,Pp3c1_23830V3.11,Pp3c1_23830V3.15,Pp3c1_23830V3.12			Stop codon excision	no
Pp3c1_sORF1168	Chr01:17550739-17550772	100	CDS	Pp3c1_23870V3.1,Pp3c1_23870V3.2				no
Pp3c1_sORF1169	Chr01:17474902-17475088	90.7	five_prime_UTR	Pp3c1_23830V3.9,Pp3c1_23830V3.7,Pp3c1_23830V3.14,Pp3c1_23830V3.1,Pp3c1_23830V3.13,Pp3c1_23830V3.10,Pp3c1_23830V3.8,Pp3c1_23830V3.3,Pp3c1_23830V3.11,Pp3c1_23830V3.5,Pp3c1_23830V3.4,Pp3c1_23830V3.2,Pp3c1_23830V3.15,Pp3c1_23830V3.12,Pp3c1_23830V3.6				no
Pp3c1_sORF117	Chr01:1117019-1117124	91.8	three_prime_UTR	Pp3c1_1570V3.1,Pp3c1_1570V3.3,Pp3c1_1570V3.2				no
Pp3c1_sORF1170	Chr01:17475151-17475238	94	five_prime_UTR	Pp3c1_23830V3.9,Pp3c1_23830V3.7,Pp3c1_23830V3.14,Pp3c1_23830V3.1,Pp3c1_23830V3.13,Pp3c1_23830V3.10,Pp3c1_23830V3.8,Pp3c1_23830V3.3,Pp3c1_23830V3.11,Pp3c1_23830V3.5,Pp3c1_23830V3.4,Pp3c1_23830V3.2,Pp3c1_23830V3.15,Pp3c1_23830V3.12,Pp3c1_23830V3.6				no
Pp3c1_sORF1171	Chr01:17576324-17576504	100	Interlaced	Pp3c1_23900V3.5,Pp3c1_23900V3.4			Start codon excision	no
Pp3c1_sORF1172	Chr01:17478338-17478410	99.1	CDS	Pp3c1_23850V3.1,Pp3c1_23850V3.4,Pp3c1_23850V3.3,Pp3c1_23850V3.5,Pp3c1_23850V3.2				no
Pp3c1_sORF1173	Chr01:17640199-17640322	88.1	five_prime_UTR	Pp3c1_23940V3.2,Pp3c1_23940V3.1				no
Pp3c1_sORF1174	Chr01:17649102-17649363	45.3	five_prime_UTR	Pp3c1_23960V3.3,Pp3c1_23960V3.1,Pp3c1_23960V3.2				no
Pp3c1_sORF1175	Chr01:17649747-17649885	99.5	CDS	Pp3c1_23960V3.3,Pp3c1_23960V3.1			Start codon excision	no
Pp3c1_sORF1176	Chr01:17651038-17651146	89.6	CDS	Pp3c1_23960V3.3,Pp3c1_23960V3.1,Pp3c1_23960V3.2				no
Pp3c1_sORF1177	Chr01:1417892-1417943	92.7	CDS	Pp3c1_2010V3.2,Pp3c1_2010V3.1				no
Pp3c1_sORF1178	Chr01:1417943-1418051	99.8	CDS	Pp3c1_2010V3.2,Pp3c1_2010V3.1				no
Pp3c1_sORF1179	Chr01:17699393-17699453	96.2	CDS	Pp3c1_24000V3.2,Pp3c1_24000V3.1				no
Pp3c1_sORF118	Chr01:11207900-11208047	88.3	Interlaced	Pp3c1_14870V3.3	Ceratodon	Ceratodon:4.1685	Start codon excision	no
Pp3c1_sORF1180	Chr01:17704011-17704173	99.5	CDS	Pp3c1_24000V3.2,Pp3c1_24000V3.1	Ceratodon	Ceratodon:2.7354		no
Pp3c1_sORF1181	Chr01:17706257-17706365	79.4	three_prime_UTR	Pp3c1_24000V3.1				no
Pp3c1_sORF1182	Chr01:17712131-17712350	52.3	five_prime_UTR	Pp3c1_24020V3.1				no
Pp3c1_sORF1183	Chr01:17712939-17713047	83.5	five_prime_UTR	Pp3c1_24020V3.2			Stop codon excision	no
Pp3c1_sORF1184	Chr01:17713043-17713232	92.2	five_prime_UTR	Pp3c1_24020V3.2			Start codon excision	no
Pp3c1_sORF1185	Chr01:17714741-17714813	92.1	CDS	Pp3c1_24020V3.2,Pp3c1_24020V3.1				no
Pp3c1_sORF1186	Chr01:17716214-17716460	78.4	Intergenic	ID=XLOC_029589|TCONS_00050640				no
Pp3c1_sORF1187	Chr01:17654498-17654546	97.4	CDS	Pp3c1_23970V3.1,Pp3c1_23970V3.2				no
Pp3c1_sORF1188	Chr01:17655526-17655628	76.6	CDS	Pp3c1_23970V3.1,Pp3c1_23970V3.2				no
Pp3c1_sORF1189	Chr01:17657248-17657377	98.5	five_prime_UTR	Pp3c1_23970V3.2				no
Pp3c1_sORF119	Chr01:11211172-11211337	56.7	three_prime_UTR	Pp3c1_14870V3.3,Pp3c1_14870V3.4,Pp3c1_14870V3.2				no
Pp3c1_sORF1190	Chr01:17696257-17696392	81.2	lncRNA	Pp3c1_23990V3.1,Pp3c1_23990V3.2 | lncRNAs: lcl|Ppatens_Pp3c1_23990V3.1,lcl|Ppatens_Pp3c1_23990V3.2				no
Pp3c1_sORF1191	Chr01:17779042-17779267	99.5	Interlaced	Pp3c1_24120V3.2,Pp3c1_24120V3.1				no
Pp3c1_sORF1192	Chr01:17779143-17779245	73.1	Interlaced	Pp3c1_24120V3.2,Pp3c1_24120V3.1				no
Pp3c1_sORF1193	Chr01:17780037-17780223	47.2	three_prime_UTR	Pp3c1_24120V3.2,Pp3c1_24120V3.1				no
Pp3c1_sORF1194	Chr01:17805-17886	96.1	five_prime_UTR	Pp3c1_40V3.2				no
Pp3c1_sORF1195	Chr01:17752372-17752423	97.5	three_prime_UTR	Pp3c1_24090V3.3,Pp3c1_24090V3.2,Pp3c1_24090V3.4,Pp3c1_24090V3.1				no
Pp3c1_sORF1196	Chr01:17752838-17753009	92.3	Interlaced	Pp3c1_24090V3.3,Pp3c1_24090V3.2,Pp3c1_24090V3.4,Pp3c1_24090V3.1				no
Pp3c1_sORF1197	Chr01:17753060-17753198	74.7	CDS	Pp3c1_24090V3.3,Pp3c1_24090V3.2,Pp3c1_24090V3.4,Pp3c1_24090V3.1	Ceratodon	Ceratodon:99		no
Pp3c1_sORF1198	Chr01:17834-18062	83.7	five_prime_UTR	Pp3c1_40V3.2				no
Pp3c1_sORF1199	Chr01:17753321-17753456	71.1	CDS	Pp3c1_24090V3.3,Pp3c1_24090V3.2,Pp3c1_24090V3.4,Pp3c1_24090V3.1	Sphagnum	Sphagnum:0.7187		no
Pp3c1_sORF12	Chr01:10069675-10069747	96.5	CDS	Pp3c1_13800V3.1,Pp3c1_13800V3.2,Pp3c1_13800V3.3				no
Pp3c1_sORF120	Chr01:11211333-11211495	62.3	three_prime_UTR	Pp3c1_14870V3.3,Pp3c1_14870V3.4,Pp3c1_14870V3.2				no
Pp3c1_sORF1200	Chr01:17770454-17770502	96.6	CDS	Pp3c1_24111V3.2,Pp3c1_24111V3.1,Pp3c1_24110V3.1				no
Pp3c1_sORF1201	Chr01:17773433-17773541	99.6	CDS	Pp3c1_24111V3.2,Pp3c1_24111V3.1,Pp3c1_24110V3.1				no
Pp3c1_sORF1202	Chr01:17773556-17773742	81	CDS	Pp3c1_24111V3.2,Pp3c1_24111V3.1,Pp3c1_24110V3.1				no
Pp3c1_sORF1203	Chr01:17773808-17773871	93.7	CDS	Pp3c1_24111V3.2,Pp3c1_24111V3.1,Pp3c1_24110V3.1				no
Pp3c1_sORF1204	Chr01:17871049-17871133	84.9	three_prime_UTR	Pp3c1_24280V3.4,Pp3c1_24280V3.3,Pp3c1_24280V3.5,Pp3c1_24280V3.1,Pp3c1_24280V3.2				no
Pp3c1_sORF1205	Chr01:17877152-17877185	93.4	CDS	Pp3c1_24295V3.1				no
Pp3c1_sORF1206	Chr01:17881076-17881157	90.8	five_prime_UTR	Pp3c1_24320V3.1,Pp3c1_24320V3.2				no
Pp3c1_sORF1207	Chr01:17882776-17882941	57.5	five_prime_UTR	Pp3c1_24320V3.2			Stop codon excision	no
Pp3c1_sORF1208	Chr01:17883306-17883552	97.9	CDS	Pp3c1_24320V3.1,Pp3c1_24320V3.2,Pp3c1_24320V3.3				no
Pp3c1_sORF1209	Chr01:17883889-17883931	94	CDS	Pp3c1_24320V3.1,Pp3c1_24320V3.2				no
Pp3c1_sORF121	Chr01:767693-767771	93.3	three_prime_UTR	Pp3c1_1160V3.2				no
Pp3c1_sORF1210	Chr01:17890911-17890998	99.5	CDS	Pp3c1_24340V3.1				no
Pp3c1_sORF1211	Chr01:17891728-17891803	95.7	three_prime_UTR	Pp3c1_24340V3.1,Pp3c1_24340V3.2				no
Pp3c1_sORF1212	Chr01:17893-17929	98.4	five_prime_UTR	Pp3c1_40V3.2				no
Pp3c1_sORF1213	Chr01:17915529-17915580	99.8	lncRNA	Pp3c1_24420V3.1,Pp3c1_24420V3.2 | lncRNAs: lcl|Ppatens_Pp3c1_24420V3.1,lcl|Ppatens_Pp3c1_24420V3.2				no
Pp3c1_sORF1214	Chr01:17916040-17916334	42898	lncRNA	Pp3c1_24420V3.2 | lncRNAs: lcl|Ppatens_Pp3c1_24420V3.2			Start codon excision	no
Pp3c1_sORF1215	Chr01:17916116-17916173	88.6	lncRNA	Pp3c1_24420V3.2 | lncRNAs: lcl|Ppatens_Pp3c1_24420V3.2			Start codon excision	no
Pp3c1_sORF1216	Chr01:17938512-17938587	93.6	CDS	Pp3c1_24440V3.2				no
Pp3c1_sORF1217	Chr01:17940244-17940418	87.6	three_prime_UTR	Pp3c1_24440V3.1,Pp3c1_24440V3.2				no
Pp3c1_sORF1218	Chr01:17958256-17958310	99.6	CDS	Pp3c1_24500V3.1,Pp3c1_24500V3.2				no
Pp3c1_sORF1219	Chr01:17958517-17958646	98.6	CDS	Pp3c1_24500V3.1,Pp3c1_24500V3.2				no
Pp3c1_sORF122	Chr01:11212497-11212578	92.2	three_prime_UTR	Pp3c1_14870V3.3,Pp3c1_14870V3.4,Pp3c1_14870V3.2				no
Pp3c1_sORF1220	Chr01:17958718-17958922	99.8	CDS	Pp3c1_24500V3.1,Pp3c1_24500V3.2				no
Pp3c1_sORF1221	Chr01:17959144-17959207	99	CDS	Pp3c1_24500V3.1,Pp3c1_24500V3.2				no
Pp3c1_sORF1222	Chr01:17959298-17959397	77.3	CDS	Pp3c1_24500V3.1,Pp3c1_24500V3.2	Ceratodon	Ceratodon:2.1333		no
Pp3c1_sORF1223	Chr01:17959658-17959781	95.2	three_prime_UTR	Pp3c1_24500V3.1,Pp3c1_24500V3.2				no
Pp3c1_sORF1224	Chr01:17960039-17960075	94.7	three_prime_UTR	Pp3c1_24500V3.2				no
Pp3c1_sORF1225	Chr01:17880480-17880615	100	CDS	Pp3c1_24300V3.1,Pp3c1_24300V3.2				no
Pp3c1_sORF1226	Chr01:17966252-17966387	86.1	CDS	Pp3c1_24550V3.2,Pp3c1_24550V3.1				no
Pp3c1_sORF1227	Chr01:17968744-17968828	100	CDS	Pp3c1_24550V3.2,Pp3c1_24550V3.1				no
Pp3c1_sORF1228	Chr01:17971056-17971164	88.4	CDS	Pp3c1_24550V3.2,Pp3c1_24550V3.1				no
Pp3c1_sORF1229	Chr01:17891252-17891381	86.1	three_prime_UTR	Pp3c1_24350V3.1				no
Pp3c1_sORF123	Chr01:11213202-11213328	92	five_prime_UTR	Pp3c1_14880V3.1,Pp3c1_14880V3.2,Pp3c1_14880V3.4				no
Pp3c1_sORF1230	Chr01:17891394-17891541	85.9	three_prime_UTR	Pp3c1_24350V3.1				no
Pp3c1_sORF1231	Chr01:17972753-17972849	96.6	Intergenic	ID=XLOC_029570|TCONS_00050613,ID=XLOC_029570|TCONS_00050612,ID=XLOC_029570|TCONS_00050611				no
Pp3c1_sORF1232	Chr01:17892223-17892265	98.4	three_prime_UTR	Pp3c1_24350V3.1				no
Pp3c1_sORF1233	Chr01:17973171-17973240	97.8	Intergenic	ID=XLOC_029570|TCONS_00050613,ID=XLOC_029570|TCONS_00050612,ID=XLOC_029570|TCONS_00050611				no
Pp3c1_sORF1234	Chr01:17974273-17974336	86.9	Intergenic	ID=XLOC_029570|TCONS_00050613,ID=XLOC_029570|TCONS_00050612,ID=XLOC_029570|TCONS_00050611				no
Pp3c1_sORF1235	Chr01:17894194-17894299	97.5	CDS	Pp3c1_24350V3.2,Pp3c1_24350V3.1				no
Pp3c1_sORF1236	Chr01:17895365-17895425	98.4	five_prime_UTR	Pp3c1_24350V3.2,Pp3c1_24350V3.1				no
Pp3c1_sORF1237	Chr01:17978075-17978123	95.1	five_prime_UTR	Pp3c1_24570V3.2			Start codon excision	no
Pp3c1_sORF1238	Chr01:17978293-17978341	90.5	CDS	Pp3c1_24570V3.1,Pp3c1_24570V3.2				no
Pp3c1_sORF1239	Chr01:17980644-17980722	96.5	CDS	Pp3c1_24570V3.1,Pp3c1_24570V3.2				no
Pp3c1_sORF124	Chr01:11214137-11214191	93.2	five_prime_UTR	Pp3c1_14880V3.1,Pp3c1_14880V3.2,Pp3c1_14880V3.4				no
Pp3c1_sORF1240	Chr01:17998923-17998965	94.1	three_prime_UTR	Pp3c1_24600V3.6,Pp3c1_24600V3.7,Pp3c1_24600V3.4,Pp3c1_24600V3.5			Excision	no
Pp3c1_sORF1241	Chr01:17998961-17999171	43.8	three_prime_UTR	Pp3c1_24600V3.6,Pp3c1_24600V3.7,Pp3c1_24600V3.4,Pp3c1_24600V3.5	Ceratodon	Ceratodon:1.8889	Excision	no
Pp3c1_sORF1242	Chr01:17999225-17999303	85.6	three_prime_UTR	Pp3c1_24600V3.7,Pp3c1_24600V3.4,Pp3c1_24600V3.5			Excision	no
Pp3c1_sORF1243	Chr01:17999274-17999550	42900	three_prime_UTR	Pp3c1_24600V3.7,Pp3c1_24600V3.4,Pp3c1_24600V3.5			Excision	no
Pp3c1_sORF1244	Chr01:17999311-17999344	99.2	three_prime_UTR	Pp3c1_24600V3.7,Pp3c1_24600V3.4,Pp3c1_24600V3.5			Excision	no
Pp3c1_sORF1245	Chr01:17999543-17999624	84.3	three_prime_UTR	Pp3c1_24600V3.7,Pp3c1_24600V3.4,Pp3c1_24600V3.5			Excision	no
Pp3c1_sORF1246	Chr01:18043355-18043481	63	five_prime_UTR	Pp3c1_24760V3.1,Pp3c1_24760V3.5,Pp3c1_24760V3.3			Excision	no
Pp3c1_sORF1247	Chr01:18044105-18044243	90.5	CDS	Pp3c1_24760V3.1,Pp3c1_24760V3.3,Pp3c1_24760V3.4,Pp3c1_24760V3.2,Pp3c1_24760V3.5				no
Pp3c1_sORF1248	Chr01:18044309-18044387	95.6	CDS	Pp3c1_24760V3.1,Pp3c1_24760V3.3,Pp3c1_24760V3.4,Pp3c1_24760V3.2,Pp3c1_24760V3.5				no
Pp3c1_sORF1249	Chr01:18044480-18044669	99.6	CDS	Pp3c1_24760V3.1,Pp3c1_24760V3.3,Pp3c1_24760V3.4,Pp3c1_24760V3.2,Pp3c1_24760V3.5				no
Pp3c1_sORF125	Chr01:11217703-11217802	87.7	CDS	Pp3c1_14880V3.1,Pp3c1_14880V3.2,Pp3c1_14880V3.3,Pp3c1_14880V3.4				no
Pp3c1_sORF1250	Chr01:18044696-18044813	79.2	CDS	Pp3c1_24760V3.1,Pp3c1_24760V3.3,Pp3c1_24760V3.4,Pp3c1_24760V3.2,Pp3c1_24760V3.5				no
Pp3c1_sORF1251	Chr01:17963784-17963985	35.7	three_prime_UTR	Pp3c1_24530V3.2				no
Pp3c1_sORF1252	Chr01:17964010-17964046	96.9	three_prime_UTR	Pp3c1_24530V3.2				no
Pp3c1_sORF1253	Chr01:18044840-18044987	91.5	CDS	Pp3c1_24760V3.1,Pp3c1_24760V3.3,Pp3c1_24760V3.4,Pp3c1_24760V3.2,Pp3c1_24760V3.5				no
Pp3c1_sORF1254	Chr01:18045099-18045135	97.6	CDS	Pp3c1_24760V3.1,Pp3c1_24760V3.3,Pp3c1_24760V3.4,Pp3c1_24760V3.2,Pp3c1_24760V3.5				no
Pp3c1_sORF1255	Chr01:18045188-18045257	98.7	CDS	Pp3c1_24760V3.1,Pp3c1_24760V3.3,Pp3c1_24760V3.4,Pp3c1_24760V3.2,Pp3c1_24760V3.5				no
Pp3c1_sORF1256	Chr01:18045437-18045482	92.5	CDS	Pp3c1_24760V3.1,Pp3c1_24760V3.3,Pp3c1_24760V3.4,Pp3c1_24760V3.2,Pp3c1_24760V3.5				no
Pp3c1_sORF1257	Chr01:18045506-18045653	100	CDS	Pp3c1_24760V3.2,Pp3c1_24760V3.1,Pp3c1_24760V3.3			Stop codon excision	no
Pp3c1_sORF1258	Chr01:17964972-17965077	92.6	CDS	Pp3c1_24530V3.2,Pp3c1_24530V3.1				no
Pp3c1_sORF1259	Chr01:1804607-1804742	95.7	CDS	Pp3c1_2390V3.1	Ceratodon	Ceratodon:99		no
Pp3c1_sORF126	Chr01:11217874-11218033	100	CDS	Pp3c1_14880V3.1,Pp3c1_14880V3.2,Pp3c1_14880V3.3,Pp3c1_14880V3.4				no
Pp3c1_sORF1260	Chr01:18047026-18047104	94	CDS	Pp3c1_24760V3.1,Pp3c1_24760V3.3,Pp3c1_24760V3.4,Pp3c1_24760V3.2,Pp3c1_24760V3.5				no
Pp3c1_sORF1261	Chr01:18048268-18048340	96.6	CDS	Pp3c1_24760V3.1,Pp3c1_24760V3.3,Pp3c1_24760V3.4,Pp3c1_24760V3.2,Pp3c1_24760V3.5				no
Pp3c1_sORF1262	Chr01:18051132-18051168	99.9	CDS	Pp3c1_24760V3.1,Pp3c1_24760V3.3,Pp3c1_24760V3.4,Pp3c1_24760V3.2,Pp3c1_24760V3.5				no
Pp3c1_sORF1263	Chr01:18051578-18051689	81.8	CDS	Pp3c1_24760V3.1,Pp3c1_24760V3.3,Pp3c1_24760V3.4,Pp3c1_24760V3.2,Pp3c1_24760V3.5				no
Pp3c1_sORF1264	Chr01:18051786-18051957	75.9	three_prime_UTR	Pp3c1_24760V3.1,Pp3c1_24760V3.3,Pp3c1_24760V3.4,Pp3c1_24760V3.2,Pp3c1_24760V3.5				no
Pp3c1_sORF1265	Chr01:1805570-1805660	96.4	CDS	Pp3c1_2390V3.1				no
Pp3c1_sORF1266	Chr01:1806702-1806873	99.9	CDS	Pp3c1_2390V3.1	Ceratodon	Ceratodon:2.9937		no
Pp3c1_sORF1267	Chr01:1807201-1807357	93.5	three_prime_UTR	Pp3c1_2390V3.1				no
Pp3c1_sORF1268	Chr01:18086879-18086924	90.4	Interlaced	Pp3c1_24820V3.2				no
Pp3c1_sORF1269	Chr01:18087068-18087320	53.6	CDS	Pp3c1_24820V3.1,Pp3c1_24820V3.2				no
Pp3c1_sORF127	Chr01:768494-768539	93	CDS	Pp3c1_1170V3.2				no
Pp3c1_sORF1270	Chr01:18006582-18006696	90	five_prime_UTR	Pp3c1_24640V3.5				no
Pp3c1_sORF1271	Chr01:18087575-18087632	97.9	CDS	Pp3c1_24820V3.1,Pp3c1_24820V3.2				no
Pp3c1_sORF1272	Chr01:18087854-18087929	99.1	CDS	Pp3c1_24820V3.1,Pp3c1_24820V3.2				no
Pp3c1_sORF1273	Chr01:18088316-18088469	77.3	three_prime_UTR	Pp3c1_24820V3.1,Pp3c1_24820V3.2				no
Pp3c1_sORF1274	Chr01:18089875-18089917	99.7	CDS	Pp3c1_24830V3.2,Pp3c1_24830V3.1				no
Pp3c1_sORF1275	Chr01:18041476-18041569	99.2	three_prime_UTR	Pp3c1_24730V3.1				no
Pp3c1_sORF1276	Chr01:1812589-1812793	92.3	five_prime_UTR	Pp3c1_2420V3.1				no
Pp3c1_sORF1277	Chr01:18131-18176	95.1	five_prime_UTR	Pp3c1_40V3.2				no
Pp3c1_sORF1278	Chr01:1813466-1813520	89.9	CDS	Pp3c1_2420V3.2,Pp3c1_2420V3.1				no
Pp3c1_sORF1279	Chr01:1814235-1814349	77.9	CDS	Pp3c1_2420V3.2,Pp3c1_2420V3.1				no
Pp3c1_sORF128	Chr01:768746-768878	98.2	CDS	Pp3c1_1170V3.2				no
Pp3c1_sORF1280	Chr01:18154254-18154347	91	CDS	Pp3c1_24930V3.6				no
Pp3c1_sORF1281	Chr01:18154527-18154674	97.7	CDS	Pp3c1_24930V3.6				no
Pp3c1_sORF1282	Chr01:18074423-18074516	90.5	lncRNA	Pp3c1_24779V3.1 | lncRNAs: lcl|Ppatens_Pp3c1_24779V3.1				no
Pp3c1_sORF1283	Chr01:18157879-18157999	91.7	lncRNA	Pp3c1_24950V3.2 | lncRNAs: lcl|Ppatens_Pp3c1_24950V3.2				no
Pp3c1_sORF1284	Chr01:18158151-18158235	98.9	lncRNA	Pp3c1_24950V3.2,Pp3c1_24950V3.1 | lncRNAs: lcl|Ppatens_Pp3c1_24950V3.2				no
Pp3c1_sORF1285	Chr01:18158400-18158469	100	CDS	Pp3c1_24950V3.1			Stop codon excision	no
Pp3c1_sORF1286	Chr01:18077693-18077846	56.8	five_prime_UTR	Pp3c1_24790V3.1,Pp3c1_24790V3.2				no
Pp3c1_sORF1287	Chr01:18162519-18162681	99.6	CDS	Pp3c1_24960V3.1,Pp3c1_24950V3.1	Ceratodon,Sphagnum	Ceratodon:1.5608,Sphagnum:2.1524		no
Pp3c1_sORF1288	Chr01:18164156-18164267	99.2	CDS	Pp3c1_24960V3.1,Pp3c1_24950V3.1				no
Pp3c1_sORF1289	Chr01:18164429-18164468	97.9	CDS	Pp3c1_24960V3.1,Pp3c1_24950V3.1				no
Pp3c1_sORF129	Chr01:11228005-11228203	56.3	five_prime_UTR	Pp3c1_14900V3.4,Pp3c1_14900V3.1,Pp3c1_14900V3.3,Pp3c1_14900V3.2				no
Pp3c1_sORF1290	Chr01:18164555-18164651	79.2	CDS	Pp3c1_24950V3.1			Stop codon excision	no
Pp3c1_sORF1291	Chr01:18165094-18165145	100	CDS	Pp3c1_24960V3.1			Excision	no
Pp3c1_sORF1292	Chr01:18085427-18085460	97.5	CDS	Pp3c1_24800V3.1				no
Pp3c1_sORF1293	Chr01:18092439-18092559	99.9	CDS	Pp3c1_24840V3.7,Pp3c1_24840V3.3,Pp3c1_24840V3.4,Pp3c1_24840V3.2,Pp3c1_24840V3.1			Excision	no
Pp3c1_sORF1294	Chr01:18092724-18092922	89.6	CDS	Pp3c1_24840V3.5,Pp3c1_24840V3.7,Pp3c1_24840V3.6,Pp3c1_24840V3.3,Pp3c1_24840V3.4,Pp3c1_24840V3.2,Pp3c1_24840V3.1	Ceratodon	Ceratodon:1.024		no
Pp3c1_sORF1295	Chr01:18093228-18093288	98.4	CDS	Pp3c1_24840V3.5,Pp3c1_24840V3.7,Pp3c1_24840V3.6,Pp3c1_24840V3.3,Pp3c1_24840V3.4,Pp3c1_24840V3.2,Pp3c1_24840V3.1				no
Pp3c1_sORF1296	Chr01:18093630-18093672	97.8	CDS	Pp3c1_24840V3.5,Pp3c1_24840V3.7,Pp3c1_24840V3.6,Pp3c1_24840V3.3,Pp3c1_24840V3.4,Pp3c1_24840V3.2,Pp3c1_24840V3.1				no
Pp3c1_sORF1297	Chr01:18095232-18095322	97.9	Interlaced	Pp3c1_24840V3.7			Excision	no
Pp3c1_sORF1298	Chr01:18099169-18099202	97.5	CDS	Pp3c1_24850V3.1,Pp3c1_24850V3.3,Pp3c1_24850V3.2				no
Pp3c1_sORF1299	Chr01:18180553-18180706	78.4	five_prime_UTR	Pp3c1_24960V3.1				no
Pp3c1_sORF13	Chr01:10070183-10070264	91.9	three_prime_UTR	Pp3c1_13800V3.1,Pp3c1_13800V3.2,Pp3c1_13800V3.3				no
Pp3c1_sORF130	Chr01:11228509-11228557	92.7	five_prime_UTR	Pp3c1_14900V3.4,Pp3c1_14900V3.1,Pp3c1_14900V3.3,Pp3c1_14900V3.2				no
Pp3c1_sORF1300	Chr01:18181022-18181097	99.7	five_prime_UTR	Pp3c1_24980V3.1				no
Pp3c1_sORF1301	Chr01:1818199-1818238	99.4	CDS	Pp3c1_2460V3.1				no
Pp3c1_sORF1302	Chr01:18101438-18101555	84.3	CDS	Pp3c1_24850V3.1,Pp3c1_24850V3.3,Pp3c1_24850V3.2	Ceratodon	Ceratodon:1.6685		no
Pp3c1_sORF1303	Chr01:18101609-18101873	63.4	CDS	Pp3c1_24850V3.1,Pp3c1_24850V3.3,Pp3c1_24850V3.2	Ceratodon	Ceratodon:2.6822		no
Pp3c1_sORF1304	Chr01:18102785-18102833	93.7	five_prime_UTR	Pp3c1_24850V3.1,Pp3c1_24850V3.3,Pp3c1_24850V3.2				no
Pp3c1_sORF1305	Chr01:1818696-1818780	94.6	CDS	Pp3c1_2460V3.2				no
Pp3c1_sORF1306	Chr01:18188121-18188202	91.5	CDS	Pp3c1_25000V3.2,Pp3c1_25000V3.1	Ceratodon	Ceratodon:1.493		no
Pp3c1_sORF1307	Chr01:18123718-18123760	93.6	lncRNA	Pp3c1_24890V3.2,Pp3c1_24890V3.1 | lncRNAs: lcl|Ppatens_Pp3c1_24890V3.1,lcl|Ppatens_Pp3c1_24890V3.2				no
Pp3c1_sORF1308	Chr01:18209640-18209682	97.8	five_prime_UTR	Pp3c1_25070V3.3,Pp3c1_25070V3.1,Pp3c1_25070V3.2,Pp3c1_25070V3.4				no
Pp3c1_sORF1309	Chr01:18209672-18209732	100	five_prime_UTR	Pp3c1_25070V3.3,Pp3c1_25070V3.1,Pp3c1_25070V3.2,Pp3c1_25070V3.4				no
Pp3c1_sORF131	Chr01:11229192-11229246	98.1	CDS	Pp3c1_14900V3.4,Pp3c1_14900V3.1,Pp3c1_14900V3.3,Pp3c1_14900V3.2				no
Pp3c1_sORF1310	Chr01:18210165-18210273	99.8	five_prime_UTR,CDS	Pp3c1_25070V3.3,Pp3c1_25070V3.1,Pp3c1_25070V3.2,Pp3c1_25070V3.4				no
Pp3c1_sORF1311	Chr01:18211548-18211620	91.6	CDS	Pp3c1_25070V3.3,Pp3c1_25070V3.1,Pp3c1_25070V3.2,Pp3c1_25070V3.4				no
Pp3c1_sORF1312	Chr01:18214709-18214754	89.7	CDS	Pp3c1_25070V3.3,Pp3c1_25070V3.1,Pp3c1_25070V3.2,Pp3c1_25070V3.4				no
Pp3c1_sORF1313	Chr01:1821515-1821566	95.6	CDS	Pp3c1_2460V3.1				no
Pp3c1_sORF1314	Chr01:1823538-1823592	94.7	CDS	Pp3c1_2460V3.1				no
Pp3c1_sORF1315	Chr01:1823703-1823748	90.6	CDS	Pp3c1_2460V3.1				no
Pp3c1_sORF1316	Chr01:18240771-18240954	83.3	CDS	Pp3c1_25100V3.1,Pp3c1_25100V3.2,Pp3c1_25100V3.3				no
Pp3c1_sORF1317	Chr01:18241020-18241161	88.8	Interlaced	Pp3c1_25100V3.1,Pp3c1_25100V3.2,Pp3c1_25100V3.3				no
Pp3c1_sORF1318	Chr01:18242205-18242439	99.9	three_prime_UTR	Pp3c1_25100V3.3	Ceratodon	Ceratodon:0.3031		no
Pp3c1_sORF1319	Chr01:18242514-18242685	95	three_prime_UTR	Pp3c1_25100V3.3				no
Pp3c1_sORF132	Chr01:11229625-11229682	92.4	CDS	Pp3c1_14900V3.4,Pp3c1_14900V3.1,Pp3c1_14900V3.3,Pp3c1_14900V3.2				no
Pp3c1_sORF1320	Chr01:18242584-18242656	99.7	three_prime_UTR	Pp3c1_25100V3.3				no
Pp3c1_sORF1321	Chr01:18242881-18242947	99.8	three_prime_UTR	Pp3c1_25100V3.3				no
Pp3c1_sORF1322	Chr01:18247051-18247138	97.8	CDS	Pp3c1_25150V3.2,Pp3c1_25150V3.1				no
Pp3c1_sORF1323	Chr01:18249020-18249092	96.5	CDS	Pp3c1_25150V3.2,Pp3c1_25150V3.1				no
Pp3c1_sORF1324	Chr01:18201920-18202154	46.3	lncRNA	Pp3c1_25040V3.1 | lncRNAs: lcl|Ppatens_Pp3c1_25040V3.1				no
Pp3c1_sORF1325	Chr01:18204169-18204262	91.8	Intergenic	ID=XLOC_029463|TCONS_00050390				no
Pp3c1_sORF1326	Chr01:18204313-18204493	87.3	Intergenic	ID=XLOC_029463|TCONS_00050390				no
Pp3c1_sORF1327	Chr01:18288276-18288312	96.6	lncRNA	Pp3c1_25208V3.2,Pp3c1_25208V3.1 | lncRNAs: lcl|Ppatens_Pp3c1_25208V3.1,lcl|Ppatens_Pp3c1_25208V3.2				no
Pp3c1_sORF1328	Chr01:18288672-18288846	58.5	lncRNA	Pp3c1_25208V3.2 | lncRNAs: lcl|Ppatens_Pp3c1_25208V3.2			Excision	no
Pp3c1_sORF1329	Chr01:18291079-18291250	79.4	five_prime_UTR	Pp3c1_25220V3.3				no
Pp3c1_sORF133	Chr01:11232772-11232850	98.4	CDS	Pp3c1_14910V3.2,Pp3c1_14910V3.1				no
Pp3c1_sORF1330	Chr01:18293437-18293518	91.9	CDS	Pp3c1_25220V3.1,Pp3c1_25220V3.2,Pp3c1_25220V3.3				no
Pp3c1_sORF1331	Chr01:18293527-18293560	98.5	CDS	Pp3c1_25220V3.1,Pp3c1_25220V3.2,Pp3c1_25220V3.3				no
Pp3c1_sORF1332	Chr01:18294412-18294487	90.8	three_prime_UTR	Pp3c1_25220V3.2				no
Pp3c1_sORF1333	Chr01:18294432-18294564	75	three_prime_UTR	Pp3c1_25220V3.2				no
Pp3c1_sORF1334	Chr01:18222838-18222934	84.4	CDS	Pp3c1_25080V3.2,Pp3c1_25080V3.1				no
Pp3c1_sORF1335	Chr01:18238487-18238607	81.1	lncRNA	Pp3c1_25090V3.3,Pp3c1_25090V3.4,Pp3c1_25090V3.2,Pp3c1_25090V3.5,Pp3c1_25090V3.1 | lncRNAs: lcl|Ppatens_Pp3c1_25090V3.1,lcl|Ppatens_Pp3c1_25090V3.2,lcl|Ppatens_Pp3c1_25090V3.3,lcl|Ppatens_Pp3c1_25090V3.4,lcl|Ppatens_Pp3c1_25090V3.5				no
Pp3c1_sORF1336	Chr01:18241870-18242086	99.1	Interlaced	Pp3c1_25110V3.2,Pp3c1_25110V3.1,Pp3c1_25110V3.5,Pp3c1_25110V3.4,Pp3c1_25110V3.3				no
Pp3c1_sORF1337	Chr01:18244993-18245167	88.5	lncRNA	Pp3c1_25128V3.1 | lncRNAs: lcl|Ppatens_Pp3c1_25128V3.1				no
Pp3c1_sORF1338	Chr01:18328557-18328764	69.1	lncRNA	Pp3c1_25260V3.1 | lncRNAs: lcl|Ppatens_Pp3c1_25260V3.1				no
Pp3c1_sORF1339	Chr01:18328871-18328997	64.9	lncRNA	Pp3c1_25260V3.1 | lncRNAs: lcl|Ppatens_Pp3c1_25260V3.1				no
Pp3c1_sORF134	Chr01:11245740-11245776	96.5	CDS	Pp3c1_14920V3.2,Pp3c1_14920V3.3,Pp3c1_14920V3.5,Pp3c1_14920V3.1,Pp3c1_14920V3.4				no
Pp3c1_sORF1340	Chr01:18267252-18267369	97	CDS	Pp3c1_25190V3.16	Ceratodon	Ceratodon:1.9308		no
Pp3c1_sORF1341	Chr01:18267733-18267808	96	CDS	Pp3c1_25190V3.16				no
Pp3c1_sORF1342	Chr01:18268001-18268055	90.2	CDS	Pp3c1_25190V3.2,Pp3c1_25190V3.9,Pp3c1_25190V3.11,Pp3c1_25190V3.8,Pp3c1_25190V3.6,Pp3c1_25190V3.7,Pp3c1_25190V3.4,Pp3c1_25190V3.10,Pp3c1_25190V3.17,Pp3c1_25190V3.3,Pp3c1_25190V3.16,Pp3c1_25190V3.13,Pp3c1_25190V3.14,Pp3c1_25190V3.15,Pp3c1_25190V3.12,Pp3c1_25190V3.5,Pp3c1_25190V3.1				no
Pp3c1_sORF1343	Chr01:18268055-18268196	84.7	CDS	Pp3c1_25190V3.2,Pp3c1_25190V3.9,Pp3c1_25190V3.11,Pp3c1_25190V3.8,Pp3c1_25190V3.6,Pp3c1_25190V3.7,Pp3c1_25190V3.4,Pp3c1_25190V3.10,Pp3c1_25190V3.17,Pp3c1_25190V3.3,Pp3c1_25190V3.16,Pp3c1_25190V3.13,Pp3c1_25190V3.14,Pp3c1_25190V3.15,Pp3c1_25190V3.12,Pp3c1_25190V3.5,Pp3c1_25190V3.1	Ceratodon	Ceratodon:1.3359		no
Pp3c1_sORF1344	Chr01:18271538-18271574	99	CDS	Pp3c1_25190V3.16				no
Pp3c1_sORF1345	Chr01:18278166-18278232	95.8	CDS	Pp3c1_25190V3.16				no
Pp3c1_sORF1346	Chr01:18325777-18325951	87.8	Interlaced	Pp3c1_25250V3.2,Pp3c1_25250V3.1				no
Pp3c1_sORF1347	Chr01:18328542-18328602	93.5	five_prime_UTR	Pp3c1_25250V3.2,Pp3c1_25250V3.1				no
Pp3c1_sORF1348	Chr01:18339052-18339139	100	Interlaced	Pp3c1_25290V3.1,Pp3c1_25290V3.2				no
Pp3c1_sORF1349	Chr01:18424343-18424427	80.7	Interlaced	Pp3c1_25410V3.2,Pp3c1_25410V3.1				no
Pp3c1_sORF135	Chr01:772411-772450	94.8	CDS	Pp3c1_1170V3.2				no
Pp3c1_sORF1350	Chr01:18426376-18426445	98.6	CDS	Pp3c1_25410V3.3,Pp3c1_25410V3.2,Pp3c1_25410V3.1				no
Pp3c1_sORF1351	Chr01:18426448-18426604	66	Interlaced	Pp3c1_25410V3.3,Pp3c1_25410V3.2,Pp3c1_25410V3.1				no
Pp3c1_sORF1352	Chr01:18452283-18452403	80.7	five_prime_UTR	Pp3c1_25420V3.1			Excision	no
Pp3c1_sORF1353	Chr01:18453367-18453406	100	CDS	Pp3c1_25420V3.1,Pp3c1_25420V3.2				no
Pp3c1_sORF1354	Chr01:18453436-18453490	94.8	CDS	Pp3c1_25420V3.1,Pp3c1_25420V3.2				no
Pp3c1_sORF1355	Chr01:18454002-18454125	98.3	CDS	Pp3c1_25420V3.1,Pp3c1_25420V3.2				no
Pp3c1_sORF1356	Chr01:1848057-1848108	100	CDS	Pp3c1_2510V3.3				no
Pp3c1_sORF1357	Chr01:1848267-1848411	98.9	CDS	Pp3c1_2510V3.3				no
Pp3c1_sORF1358	Chr01:18420526-18420580	99.6	three_prime_UTR	Pp3c1_25400V3.2,Pp3c1_25400V3.1,Pp3c1_25400V3.3,Pp3c1_25400V3.4				no
Pp3c1_sORF1359	Chr01:18420713-18420893	92.5	Interlaced	Pp3c1_25400V3.2,Pp3c1_25400V3.1,Pp3c1_25400V3.3,Pp3c1_25400V3.4	Ceratodon	Ceratodon:1.6519		no
Pp3c1_sORF136	Chr01:772480-772600	99.9	CDS	Pp3c1_1170V3.2				no
Pp3c1_sORF1360	Chr01:18422165-18422318	90.8	CDS	Pp3c1_25400V3.2,Pp3c1_25400V3.1,Pp3c1_25400V3.3,Pp3c1_25400V3.4				no
Pp3c1_sORF1361	Chr01:18423404-18423437	100	CDS	Pp3c1_25400V3.2,Pp3c1_25400V3.1,Pp3c1_25400V3.3,Pp3c1_25400V3.4				no
Pp3c1_sORF1362	Chr01:18525223-18525286	99.3	CDS	Pp3c1_25570V3.2,Pp3c1_25570V3.1,Pp3c1_25570V3.3				no
Pp3c1_sORF1363	Chr01:18526294-18526381	93	three_prime_UTR	Pp3c1_25570V3.2,Pp3c1_25570V3.1,Pp3c1_25570V3.3				no
Pp3c1_sORF1364	Chr01:18458078-18458183	92.8	CDS	Pp3c1_25430V3.1,Pp3c1_25430V3.3,Pp3c1_25430V3.6,Pp3c1_25430V3.5,Pp3c1_25430V3.4,Pp3c1_25430V3.2				no
Pp3c1_sORF1365	Chr01:18458508-18458622	88.6	CDS	Pp3c1_25430V3.1,Pp3c1_25430V3.3,Pp3c1_25430V3.6,Pp3c1_25430V3.5,Pp3c1_25430V3.4,Pp3c1_25430V3.2				no
Pp3c1_sORF1366	Chr01:18459607-18459754	62.3	Interlaced	Pp3c1_25430V3.4			Start codon excision	no
Pp3c1_sORF1367	Chr01:18459872-18459926	95.1	five_prime_UTR,CDS	Pp3c1_25430V3.1,Pp3c1_25430V3.3,Pp3c1_25430V3.6,Pp3c1_25430V3.5,Pp3c1_25430V3.4,Pp3c1_25430V3.2				no
Pp3c1_sORF1368	Chr01:18460916-18461108	78.2	five_prime_UTR	Pp3c1_25430V3.1,Pp3c1_25430V3.3,Pp3c1_25430V3.6,Pp3c1_25430V3.5,Pp3c1_25430V3.4,Pp3c1_25430V3.2				no
Pp3c1_sORF1369	Chr01:18461314-18461440	57.8	five_prime_UTR	Pp3c1_25430V3.1,Pp3c1_25430V3.3,Pp3c1_25430V3.6,Pp3c1_25430V3.5,Pp3c1_25430V3.4,Pp3c1_25430V3.2				no
Pp3c1_sORF137	Chr01:11263050-11263155	89.4	lncRNA	Pp3c1_14940V3.1,Pp3c1_14940V3.2 | lncRNAs: lcl|Ppatens_Pp3c1_14940V3.1,lcl|Ppatens_Pp3c1_14940V3.2				no
Pp3c1_sORF1370	Chr01:18465961-18466009	93.1	three_prime_UTR	Pp3c1_25450V3.1				no
Pp3c1_sORF1371	Chr01:18466224-18466428	91.2	three_prime_UTR	Pp3c1_25450V3.1				no
Pp3c1_sORF1372	Chr01:18466980-18467025	97	CDS	Pp3c1_25450V3.2,Pp3c1_25450V3.1				no
Pp3c1_sORF1373	Chr01:18467253-18467469	75.4	CDS	Pp3c1_25450V3.2,Pp3c1_25450V3.1				no
Pp3c1_sORF1374	Chr01:18467761-18467794	96.8	CDS	Pp3c1_25450V3.2,Pp3c1_25450V3.1				no
Pp3c1_sORF1375	Chr01:18469761-18469941	94.9	five_prime_UTR	Pp3c1_25450V3.2,Pp3c1_25450V3.1				no
Pp3c1_sORF1376	Chr01:18545093-18545165	99.6	five_prime_UTR	Pp3c1_25570V3.3			Stop codon excision	no
Pp3c1_sORF1377	Chr01:18546914-18547034	97.3	CDS	Pp3c1_25640V3.1,Pp3c1_25640V3.3,Pp3c1_25640V3.4,Pp3c1_25640V3.5,Pp3c1_25640V3.2				no
Pp3c1_sORF1378	Chr01:18547280-18547505	98.6	CDS	Pp3c1_25640V3.1,Pp3c1_25640V3.3,Pp3c1_25640V3.4,Pp3c1_25640V3.5,Pp3c1_25640V3.2				no
Pp3c1_sORF1379	Chr01:18547743-18547806	87.9	CDS	Pp3c1_25640V3.1,Pp3c1_25640V3.3,Pp3c1_25640V3.4,Pp3c1_25640V3.5,Pp3c1_25640V3.2				no
Pp3c1_sORF138	Chr01:11263202-11263262	100	lncRNA	Pp3c1_14940V3.1,Pp3c1_14940V3.2 | lncRNAs: lcl|Ppatens_Pp3c1_14940V3.1,lcl|Ppatens_Pp3c1_14940V3.2				no
Pp3c1_sORF1380	Chr01:18548372-18548504	97.4	CDS	Pp3c1_25640V3.1,Pp3c1_25640V3.3,Pp3c1_25640V3.4,Pp3c1_25640V3.5,Pp3c1_25640V3.2				no
Pp3c1_sORF1381	Chr01:18548507-18548558	95.2	CDS	Pp3c1_25640V3.1,Pp3c1_25640V3.3,Pp3c1_25640V3.4,Pp3c1_25640V3.5,Pp3c1_25640V3.2				no
Pp3c1_sORF1382	Chr01:18570985-18571021	99.1	CDS	Pp3c1_25660V3.1,Pp3c1_25660V3.2				no
Pp3c1_sORF1383	Chr01:18571045-18571162	92	CDS	Pp3c1_25660V3.1,Pp3c1_25660V3.2				no
Pp3c1_sORF1384	Chr01:18571165-18571291	98.4	CDS	Pp3c1_25660V3.1,Pp3c1_25660V3.2				no
Pp3c1_sORF1385	Chr01:18571315-18571372	88.6	CDS	Pp3c1_25660V3.1,Pp3c1_25660V3.2				no
Pp3c1_sORF1386	Chr01:18571997-18572081	97.4	CDS	Pp3c1_25660V3.1,Pp3c1_25660V3.2				no
Pp3c1_sORF1387	Chr01:18576358-18576643	27	three_prime_UTR	Pp3c1_25660V3.2				no
Pp3c1_sORF1388	Chr01:18577334-18577397	96	CDS	Pp3c1_25680V3.3				no
Pp3c1_sORF1389	Chr01:18647964-18648204	96.3	CDS	Pp3c1_25750V3.2,Pp3c1_25750V3.4,Pp3c1_25750V3.7,Pp3c1_25750V3.3,Pp3c1_25750V3.8,Pp3c1_25750V3.5,Pp3c1_25750V3.1,Pp3c1_25750V3.6				no
Pp3c1_sORF139	Chr01:773690-773738	95.7	CDS	Pp3c1_1170V3.2				no
Pp3c1_sORF1390	Chr01:18648207-18648435	59.5	CDS	Pp3c1_25750V3.2,Pp3c1_25750V3.4,Pp3c1_25750V3.7,Pp3c1_25750V3.3,Pp3c1_25750V3.8,Pp3c1_25750V3.5,Pp3c1_25750V3.1,Pp3c1_25750V3.6				no
Pp3c1_sORF1391	Chr01:18649563-18649698	92.1	CDS	Pp3c1_25750V3.2,Pp3c1_25750V3.4,Pp3c1_25750V3.7,Pp3c1_25750V3.3,Pp3c1_25750V3.8,Pp3c1_25750V3.5,Pp3c1_25750V3.1,Pp3c1_25750V3.6	Ceratodon	Ceratodon:2.3939		no
Pp3c1_sORF1392	Chr01:18580217-18580271	92.5	five_prime_UTR	Pp3c1_25680V3.2,Pp3c1_25680V3.3				no
Pp3c1_sORF1393	Chr01:18585201-18585321	86	five_prime_UTR	Pp3c1_25700V3.1,Pp3c1_25700V3.2				no
Pp3c1_sORF1394	Chr01:18695180-18695222	96.6	lncRNA	Pp3c1_25820V3.1,Pp3c1_25820V3.3 | lncRNAs: lcl|Ppatens_Pp3c1_25820V3.1,lcl|Ppatens_Pp3c1_25820V3.3				no
Pp3c1_sORF1395	Chr01:18696349-18696490	69	lncRNA	Pp3c1_25820V3.4,Pp3c1_25820V3.3 | lncRNAs: lcl|Ppatens_Pp3c1_25820V3.3,lcl|Ppatens_Pp3c1_25820V3.4				no
Pp3c1_sORF1396	Chr01:18697967-18698078	99.6	lncRNA	Pp3c1_25820V3.3 | lncRNAs: lcl|Ppatens_Pp3c1_25820V3.3				no
Pp3c1_sORF1397	Chr01:18698171-18698246	97.7	lncRNA	Pp3c1_25820V3.3 | lncRNAs: lcl|Ppatens_Pp3c1_25820V3.3				no
Pp3c1_sORF1398	Chr01:18699958-18699991	94.1	lncRNA	Pp3c1_25820V3.2,Pp3c1_25820V3.3 | lncRNAs: lcl|Ppatens_Pp3c1_25820V3.2,lcl|Ppatens_Pp3c1_25820V3.3				no
Pp3c1_sORF1399	Chr01:18699999-18700104	95.9	lncRNA	Pp3c1_25820V3.2,Pp3c1_25820V3.3 | lncRNAs: lcl|Ppatens_Pp3c1_25820V3.2,lcl|Ppatens_Pp3c1_25820V3.3				no
Pp3c1_sORF14	Chr01:10076210-10076333	99.1	five_prime_UTR	Pp3c1_13830V3.3				no
Pp3c1_sORF140	Chr01:773864-773930	92.2	CDS	Pp3c1_1170V3.2				no
Pp3c1_sORF1400	Chr01:18700187-18700226	97.8	lncRNA	Pp3c1_25820V3.2,Pp3c1_25820V3.3 | lncRNAs: lcl|Ppatens_Pp3c1_25820V3.2,lcl|Ppatens_Pp3c1_25820V3.3				no
Pp3c1_sORF1401	Chr01:18700662-18700830	87.5	lncRNA	Pp3c1_25820V3.2,Pp3c1_25820V3.3 | lncRNAs: lcl|Ppatens_Pp3c1_25820V3.2,lcl|Ppatens_Pp3c1_25820V3.3				no
Pp3c1_sORF1402	Chr01:18701797-18701938	68.5	lncRNA	Pp3c1_25820V3.3 | lncRNAs: lcl|Ppatens_Pp3c1_25820V3.3				no
Pp3c1_sORF1403	Chr01:18702236-18702371	77.2	lncRNA	Pp3c1_25820V3.3 | lncRNAs: lcl|Ppatens_Pp3c1_25820V3.3				no
Pp3c1_sORF1404	Chr01:18702345-18702477	86.5	lncRNA	Pp3c1_25820V3.3 | lncRNAs: lcl|Ppatens_Pp3c1_25820V3.3				no
Pp3c1_sORF1405	Chr01:18715711-18715840	79.6	CDS	Pp3c1_25860V3.1				no
Pp3c1_sORF1406	Chr01:18654342-18654483	100	CDS	Pp3c1_25760V3.1,Pp3c1_25760V3.2				no
Pp3c1_sORF1407	Chr01:18656992-18657106	100	CDS	Pp3c1_25760V3.1,Pp3c1_25760V3.2				no
Pp3c1_sORF1408	Chr01:18733249-18733480	42.7	five_prime_UTR	Pp3c1_25920V3.6,Pp3c1_25920V3.5			Excision,Stop codon excision	no
Pp3c1_sORF1409	Chr01:18733479-18733524	90	five_prime_UTR	Pp3c1_25920V3.6,Pp3c1_25920V3.5			Excision	no
Pp3c1_sORF141	Chr01:773930-773969	99.2	CDS	Pp3c1_1170V3.2				no
Pp3c1_sORF1410	Chr01:18733543-18733630	89.2	five_prime_UTR	Pp3c1_25920V3.6,Pp3c1_25920V3.5			Excision	no
Pp3c1_sORF1411	Chr01:18735310-18735373	89.7	CDS	Pp3c1_25920V3.6,Pp3c1_25920V3.4,Pp3c1_25920V3.7,Pp3c1_25920V3.3,Pp3c1_25920V3.2,Pp3c1_25920V3.1,Pp3c1_25920V3.5				no
Pp3c1_sORF1412	Chr01:18670541-18670727	98.9	Intergenic	ID=XLOC_012709|TCONS_00021546,ID=XLOC_012705|TCONS_00021541				no
Pp3c1_sORF1413	Chr01:18774210-18774288	92	CDS	Pp3c1_25970V3.4				no
Pp3c1_sORF1414	Chr01:18774351-18774501	80.9	CDS	Pp3c1_25970V3.4				no
Pp3c1_sORF1415	Chr01:18775650-18775809	100	CDS	Pp3c1_25970V3.4				no
Pp3c1_sORF1416	Chr01:18777993-18778128	77.2	three_prime_UTR	Pp3c1_25970V3.4			Excision	no
Pp3c1_sORF1417	Chr01:18787022-18787130	86.6	five_prime_UTR	Pp3c1_26030V3.1,Pp3c1_26030V3.2				no
Pp3c1_sORF1418	Chr01:18787409-18787451	94	five_prime_UTR	Pp3c1_26030V3.1,Pp3c1_26030V3.2				no
Pp3c1_sORF1419	Chr01:18717060-18717105	89.4	lncRNA	Pp3c1_25870V3.1 | lncRNAs: lcl|Ppatens_Pp3c1_25870V3.1				no
Pp3c1_sORF142	Chr01:775451-775490	99	CDS	Pp3c1_1170V3.2				no
Pp3c1_sORF1420	Chr01:18788388-18788613	49.8	five_prime_UTR	Pp3c1_26030V3.1,Pp3c1_26030V3.2				no
Pp3c1_sORF1421	Chr01:18788758-18788800	98.4	five_prime_UTR	Pp3c1_26030V3.1,Pp3c1_26030V3.2				no
Pp3c1_sORF1422	Chr01:18789922-18790030	75.2	Interlaced	Pp3c1_26030V3.3,Pp3c1_26030V3.1,Pp3c1_26030V3.2				no
Pp3c1_sORF1423	Chr01:18737172-18737244	98.5	three_prime_UTR	Pp3c1_25930V3.2,Pp3c1_25930V3.1				no
Pp3c1_sORF1424	Chr01:18738703-18738736	99.2	CDS	Pp3c1_25930V3.2,Pp3c1_25930V3.1				no
Pp3c1_sORF1425	Chr01:188104-188161	97.9	five_prime_UTR	Pp3c1_370V3.3			Excision	no
Pp3c1_sORF1426	Chr01:18741537-18741768	86.3	Interlaced	Pp3c1_25940V3.2				no
Pp3c1_sORF1427	Chr01:18741969-18742017	89.8	CDS	Pp3c1_25940V3.1,Pp3c1_25940V3.2				no
Pp3c1_sORF1428	Chr01:18742104-18742290	95.7	CDS	Pp3c1_25940V3.1,Pp3c1_25940V3.2	Ceratodon	Ceratodon:0.8697		no
Pp3c1_sORF1429	Chr01:18742353-18742476	99.9	CDS	Pp3c1_25940V3.1,Pp3c1_25940V3.2				no
Pp3c1_sORF143	Chr01:11111202-11111262	94.2	CDS	Pp3c1_14770V3.14,Pp3c1_14770V3.8,Pp3c1_14770V3.19,Pp3c1_14770V3.17,Pp3c1_14770V3.2,Pp3c1_14770V3.6,Pp3c1_14770V3.13,Pp3c1_14770V3.16,Pp3c1_14770V3.20,Pp3c1_14770V3.3,Pp3c1_14770V3.12,Pp3c1_14770V3.10,Pp3c1_14770V3.15,Pp3c1_14770V3.11,Pp3c1_14770V3.4,Pp3c1_14770V3.23,Pp3c1_14770V3.5,Pp3c1_14770V3.21,Pp3c1_14770V3.22,Pp3c1_14770V3.1,Pp3c1_14770V3.9,Pp3c1_14770V3.7,Pp3c1_14770V3.18				no
Pp3c1_sORF1430	Chr01:18742623-18742872	99	CDS	Pp3c1_25940V3.1,Pp3c1_25940V3.2	Ceratodon	Ceratodon:2.684		no
Pp3c1_sORF1431	Chr01:18742968-18743148	98.5	CDS	Pp3c1_25940V3.1,Pp3c1_25940V3.2				no
Pp3c1_sORF1432	Chr01:18746875-18746926	94.5	CDS	Pp3c1_25950V3.2,Pp3c1_25950V3.1				no
Pp3c1_sORF1433	Chr01:18771268-18771322	92.4	lncRNA	Pp3c1_25959V3.1 | lncRNAs: lcl|Ppatens_Pp3c1_25959V3.1				no
Pp3c1_sORF1434	Chr01:18771516-18771549	96.9	lncRNA	Pp3c1_25959V3.1 | lncRNAs: lcl|Ppatens_Pp3c1_25959V3.1				no
Pp3c1_sORF1435	Chr01:18771699-18771738	95	lncRNA	Pp3c1_25959V3.1 | lncRNAs: lcl|Ppatens_Pp3c1_25959V3.1				no
Pp3c1_sORF1436	Chr01:18782724-18782820	85.3	CDS	Pp3c1_25980V3.1,Pp3c1_25980V3.2,Pp3c1_25980V3.3	Ceratodon	Ceratodon:1.1758		no
Pp3c1_sORF1437	Chr01:18823160-18823226	98.8	CDS	Pp3c1_26060V3.2				no
Pp3c1_sORF1438	Chr01:18823640-18823766	76	CDS	Pp3c1_26060V3.2				no
Pp3c1_sORF1439	Chr01:18825365-18825476	75.1	lncRNA	Pp3c1_26070V3.2,Pp3c1_26060V3.2 | lncRNAs: lcl|Ppatens_Pp3c1_26070V3.2				no
Pp3c1_sORF144	Chr01:11111316-11111400	86.8	CDS	Pp3c1_14770V3.14,Pp3c1_14770V3.8,Pp3c1_14770V3.19,Pp3c1_14770V3.17,Pp3c1_14770V3.2,Pp3c1_14770V3.6,Pp3c1_14770V3.13,Pp3c1_14770V3.16,Pp3c1_14770V3.20,Pp3c1_14770V3.3,Pp3c1_14770V3.12,Pp3c1_14770V3.10,Pp3c1_14770V3.15,Pp3c1_14770V3.11,Pp3c1_14770V3.4,Pp3c1_14770V3.23,Pp3c1_14770V3.5,Pp3c1_14770V3.21,Pp3c1_14770V3.22,Pp3c1_14770V3.1,Pp3c1_14770V3.9,Pp3c1_14770V3.7,Pp3c1_14770V3.18				no
Pp3c1_sORF1440	Chr01:18825331-18825493	98.9	lncRNA	Pp3c1_26070V3.2,Pp3c1_26060V3.2 | lncRNAs: lcl|Ppatens_Pp3c1_26070V3.2				no
Pp3c1_sORF1441	Chr01:18826255-18826354	83.3	five_prime_UTR	Pp3c1_26060V3.2				no
Pp3c1_sORF1442	Chr01:18943482-18943542	95.4	Intergenic	ID=XLOC_012808|TCONS_00021758				no
Pp3c1_sORF1443	Chr01:18944321-18944609	95.6	CDS	Pp3c1_26220V3.1				no
Pp3c1_sORF1444	Chr01:18939834-18939870	94	CDS	Pp3c1_26200V3.4,Pp3c1_26200V3.1,Pp3c1_26200V3.2,Pp3c1_26200V3.3				no
Pp3c1_sORF1445	Chr01:18942490-18942670	67.3	five_prime_UTR	Pp3c1_26200V3.1				no
Pp3c1_sORF1446	Chr01:18942669-18942738	96.9	five_prime_UTR	Pp3c1_26200V3.1			Start codon excision	no
Pp3c1_sORF1447	Chr01:18942811-18942853	96.9	five_prime_UTR	Pp3c1_26200V3.1			Excision	no
Pp3c1_sORF1448	Chr01:18972071-18972293	67.4	Interlaced	Pp3c1_26250V3.1,Pp3c1_26250V3.4,Pp3c1_26250V3.2,Pp3c1_26250V3.6,Pp3c1_26250V3.3				no
Pp3c1_sORF1449	Chr01:18974855-18974900	94.5	five_prime_UTR	Pp3c1_26250V3.6			Excision	no
Pp3c1_sORF145	Chr01:11111411-11111534	86.9	CDS	Pp3c1_14770V3.14,Pp3c1_14770V3.8,Pp3c1_14770V3.19,Pp3c1_14770V3.17,Pp3c1_14770V3.2,Pp3c1_14770V3.6,Pp3c1_14770V3.13,Pp3c1_14770V3.16,Pp3c1_14770V3.20,Pp3c1_14770V3.3,Pp3c1_14770V3.12,Pp3c1_14770V3.10,Pp3c1_14770V3.15,Pp3c1_14770V3.11,Pp3c1_14770V3.4,Pp3c1_14770V3.23,Pp3c1_14770V3.5,Pp3c1_14770V3.21,Pp3c1_14770V3.22,Pp3c1_14770V3.1,Pp3c1_14770V3.9,Pp3c1_14770V3.7,Pp3c1_14770V3.18				no
Pp3c1_sORF1450	Chr01:18985286-18985454	74.2	lncRNA	Pp3c1_26260V3.2,Pp3c1_26260V3.3,Pp3c1_26260V3.1,Pp3c1_26260V3.4 | lncRNAs: lcl|Ppatens_Pp3c1_26260V3.1,lcl|Ppatens_Pp3c1_26260V3.2,lcl|Ppatens_Pp3c1_26260V3.3,lcl|Ppatens_Pp3c1_26260V3.4				no
Pp3c1_sORF1451	Chr01:18985692-18985812	85.1	lncRNA	Pp3c1_26260V3.3,Pp3c1_26260V3.1,Pp3c1_26260V3.4 | lncRNAs: lcl|Ppatens_Pp3c1_26260V3.1,lcl|Ppatens_Pp3c1_26260V3.3,lcl|Ppatens_Pp3c1_26260V3.4			Stop codon excision	no
Pp3c1_sORF1452	Chr01:18986096-18986144	95.7	lncRNA	Pp3c1_26260V3.2,Pp3c1_26260V3.3,Pp3c1_26260V3.4 | lncRNAs: lcl|Ppatens_Pp3c1_26260V3.2,lcl|Ppatens_Pp3c1_26260V3.3,lcl|Ppatens_Pp3c1_26260V3.4				no
Pp3c1_sORF1453	Chr01:18985941-18986148	49.9	lncRNA	Pp3c1_26260V3.2,Pp3c1_26260V3.3,Pp3c1_26260V3.4 | lncRNAs: lcl|Ppatens_Pp3c1_26260V3.2,lcl|Ppatens_Pp3c1_26260V3.3,lcl|Ppatens_Pp3c1_26260V3.4				no
Pp3c1_sORF1454	Chr01:18987156-18987192	95.9	three_prime_UTR	Pp3c1_26270V3.2				no
Pp3c1_sORF1455	Chr01:18987112-18987334	35.2	three_prime_UTR	Pp3c1_26260V3.4				no
Pp3c1_sORF1456	Chr01:18987516-18987633	78.6	CDS	Pp3c1_26270V3.2				no
Pp3c1_sORF1457	Chr01:18993816-18993861	89.9	CDS	Pp3c1_26280V3.2,Pp3c1_26280V3.1				no
Pp3c1_sORF1458	Chr01:190922-191012	86.1	CDS	Pp3c1_370V3.2,Pp3c1_370V3.1,Pp3c1_370V3.3,Pp3c1_370V3.4	Ceratodon	Ceratodon:99		no
Pp3c1_sORF1459	Chr01:191376-191430	92.4	three_prime_UTR	Pp3c1_370V3.2,Pp3c1_370V3.1,Pp3c1_370V3.3,Pp3c1_370V3.4				no
Pp3c1_sORF146	Chr01:11111749-11111953	45.7	five_prime_UTR	Pp3c1_14770V3.14,Pp3c1_14770V3.8,Pp3c1_14770V3.23,Pp3c1_14770V3.17,Pp3c1_14770V3.21,Pp3c1_14770V3.13,Pp3c1_14770V3.16			Start codon excision,Stop codon excision	no
Pp3c1_sORF1460	Chr01:19080113-19080176	94.3	CDS	Pp3c1_26350V3.2,Pp3c1_26350V3.1				no
Pp3c1_sORF1461	Chr01:19334049-19334118	87.5	five_prime_UTR	Pp3c1_26600V3.3,Pp3c1_26600V3.5			Excision	no
Pp3c1_sORF1462	Chr01:19334114-19334189	97.7	five_prime_UTR	Pp3c1_26600V3.3,Pp3c1_26600V3.5			Excision	no
Pp3c1_sORF1463	Chr01:19334236-19334479	86.2	Interlaced	Pp3c1_26600V3.3,Pp3c1_26600V3.5,Pp3c1_26600V3.1,Pp3c1_26600V3.2,Pp3c1_26600V3.4			Start codon excision	no
Pp3c1_sORF1464	Chr01:19336180-19336234	95.2	three_prime_UTR	Pp3c1_26600V3.3,Pp3c1_26600V3.5,Pp3c1_26600V3.1,Pp3c1_26600V3.2,Pp3c1_26600V3.6,Pp3c1_26600V3.4,Pp3c1_26600V3.7				no
Pp3c1_sORF1465	Chr01:19299363-19299417	95.8	three_prime_UTR	Pp3c1_26350V3.2				no
Pp3c1_sORF1466	Chr01:19299473-19299605	78.5	three_prime_UTR,CDS	Pp3c1_26530V3.2				no
Pp3c1_sORF1467	Chr01:19299653-19299758	79	three_prime_UTR	Pp3c1_26530V3.2			Start codon excision	no
Pp3c1_sORF1468	Chr01:19301118-19301361	87.1	Interlaced	Pp3c1_26530V3.2				no
Pp3c1_sORF1469	Chr01:19301642-19301873	80	five_prime_UTR	Pp3c1_26530V3.2				no
Pp3c1_sORF147	Chr01:776232-776271	96.6	CDS	Pp3c1_1170V3.2				no
Pp3c1_sORF1470	Chr01:19302858-19302915	100	CDS	Pp3c1_26540V3.1				no
Pp3c1_sORF1471	Chr01:19303266-19303353	93.7	CDS	Pp3c1_26540V3.1				no
Pp3c1_sORF1472	Chr01:19393681-19393816	96.3	CDS	Pp3c1_26700V3.1,Pp3c1_26700V3.3,Pp3c1_26700V3.2				no
Pp3c1_sORF1473	Chr01:19393827-19394040	92.6	Interlaced	Pp3c1_26700V3.1,Pp3c1_26700V3.3,Pp3c1_26700V3.2				no
Pp3c1_sORF1474	Chr01:19397312-19397390	94.1	five_prime_UTR	Pp3c1_26700V3.3				no
Pp3c1_sORF1475	Chr01:19398192-19398261	89.5	CDS	Pp3c1_26720V3.2				no
Pp3c1_sORF1476	Chr01:19398800-19398890	80.5	CDS	Pp3c1_26720V3.2				no
Pp3c1_sORF1477	Chr01:19400652-19400769	82.3	Interlaced	Pp3c1_26720V3.2				no
Pp3c1_sORF1478	Chr01:19401989-19402229	98	CDS	Pp3c1_26730V3.1,Pp3c1_26730V3.2				no
Pp3c1_sORF1479	Chr01:19402700-19402760	97.9	CDS	Pp3c1_26730V3.1,Pp3c1_26730V3.2				no
Pp3c1_sORF148	Chr01:776766-776826	99.6	lncRNA	Pp3c1_1170V3.3,Pp3c1_1170V3.2 | lncRNAs: lcl|Ppatens_Pp3c1_1170V3.3				no
Pp3c1_sORF1480	Chr01:19404201-19404378	46.6	three_prime_UTR	Pp3c1_26730V3.1,Pp3c1_26730V3.2				no
Pp3c1_sORF1481	Chr01:19405192-19405294	99.9	CDS	Pp3c1_26740V3.2,Pp3c1_26740V3.1				no
Pp3c1_sORF1482	Chr01:19451322-19451394	95	lncRNA	Pp3c1_26899V3.1 | lncRNAs: lcl|Ppatens_Pp3c1_26899V3.1				no
Pp3c1_sORF1483	Chr01:19451335-19451497	96.5	lncRNA	Pp3c1_26899V3.1 | lncRNAs: lcl|Ppatens_Pp3c1_26899V3.1				no
Pp3c1_sORF1484	Chr01:19386466-19386502	99.9	CDS	Pp3c1_26680V3.3,Pp3c1_26680V3.4,Pp3c1_26680V3.1,Pp3c1_26680V3.2				no
Pp3c1_sORF1485	Chr01:19451977-19452010	97.3	five_prime_UTR	Pp3c1_26930V3.3,Pp3c1_26930V3.1,Pp3c1_26930V3.2				no
Pp3c1_sORF1486	Chr01:19452503-19452656	79	five_prime_UTR	Pp3c1_26930V3.3,Pp3c1_26930V3.1,Pp3c1_26930V3.2				no
Pp3c1_sORF1487	Chr01:19387089-19387188	79.6	CDS	Pp3c1_26680V3.3,Pp3c1_26680V3.4,Pp3c1_26680V3.1,Pp3c1_26680V3.2	Ceratodon	Ceratodon:1.4735		no
Pp3c1_sORF1488	Chr01:19387730-19387787	88.7	CDS	Pp3c1_26680V3.3,Pp3c1_26680V3.4,Pp3c1_26680V3.1,Pp3c1_26680V3.2				no
Pp3c1_sORF1489	Chr01:19453282-19453402	99.8	CDS	Pp3c1_26930V3.3,Pp3c1_26930V3.4,Pp3c1_26930V3.1,Pp3c1_26930V3.2	Ceratodon	Ceratodon:1.5573		no
Pp3c1_sORF149	Chr01:776731-776863	64.6	lncRNA	Pp3c1_1170V3.3,Pp3c1_1170V3.2 | lncRNAs: lcl|Ppatens_Pp3c1_1170V3.3				no
Pp3c1_sORF1490	Chr01:19453708-19453807	99.7	CDS	Pp3c1_26930V3.3,Pp3c1_26930V3.4,Pp3c1_26930V3.1,Pp3c1_26930V3.2				no
Pp3c1_sORF1491	Chr01:19388457-19388736	46.8	Interlaced	Pp3c1_26680V3.4	Ceratodon	Ceratodon:2.3852	Start codon excision	no
Pp3c1_sORF1492	Chr01:19389169-19389235	98.7	five_prime_UTR	Pp3c1_26680V3.3,Pp3c1_26680V3.1,Pp3c1_26680V3.2				no
Pp3c1_sORF1493	Chr01:19389210-19389309	96.5	five_prime_UTR	Pp3c1_26680V3.3,Pp3c1_26680V3.1,Pp3c1_26680V3.2				no
Pp3c1_sORF1494	Chr01:19458915-19459062	93.1	five_prime_UTR	Pp3c1_26930V3.4				no
Pp3c1_sORF1495	Chr01:19459157-19459346	72.6	five_prime_UTR	Pp3c1_26960V3.2				no
Pp3c1_sORF1496	Chr01:19460545-19460593	91.4	CDS	Pp3c1_26960V3.1,Pp3c1_26960V3.2				no
Pp3c1_sORF1497	Chr01:19463891-19463996	77.8	CDS	Pp3c1_26960V3.1,Pp3c1_26960V3.2				no
Pp3c1_sORF1498	Chr01:19464185-19464401	51.1	three_prime_UTR	Pp3c1_26960V3.2				no
Pp3c1_sORF1499	Chr01:19407070-19407196	57	three_prime_UTR	Pp3c1_26750V3.1,Pp3c1_26750V3.2,Pp3c1_26750V3.3				no
Pp3c1_sORF15	Chr01:10077883-10077934	95.2	three_prime_UTR	Pp3c1_13830V3.2,Pp3c1_13830V3.1			Excision	no
Pp3c1_sORF150	Chr01:11326097-11326187	85.1	five_prime_UTR	Pp3c1_15090V3.1				no
Pp3c1_sORF1500	Chr01:19408142-19408229	97.8	CDS	Pp3c1_26750V3.1,Pp3c1_26750V3.2,Pp3c1_26750V3.3,Pp3c1_26750V3.4				no
Pp3c1_sORF1501	Chr01:19409184-19409280	84.7	CDS	Pp3c1_26750V3.1,Pp3c1_26750V3.2,Pp3c1_26750V3.3,Pp3c1_26750V3.4				no
Pp3c1_sORF1502	Chr01:19410877-19410925	99.1	five_prime_UTR	Pp3c1_26750V3.1,Pp3c1_26750V3.2,Pp3c1_26750V3.3,Pp3c1_26750V3.4				no
Pp3c1_sORF1503	Chr01:19414113-19414209	99.9	three_prime_UTR,CDS	Pp3c1_26750V3.4,Pp3c1_26770V3.1				no
Pp3c1_sORF1504	Chr01:19414255-19414483	54.9	three_prime_UTR	Pp3c1_26770V3.1	Arabidopsis,Morchantia,Oryza,Selaginella,Sphagnum,Spirodela,Zea	Morchantia:0.0048,Sphagnum:0.006,Oryza:0.0401,Arabidopsis:0.0068,Zea:0.1929,Spirodela:0.2848,Selaginella:0.015	Stop codon excision	no
Pp3c1_sORF1505	Chr01:19414844-19414907	85.6	three_prime_UTR	Pp3c1_26770V3.1			Stop codon excision	no
Pp3c1_sORF1506	Chr01:19415545-19415674	86.5	CDS	Pp3c1_26770V3.1				no
Pp3c1_sORF1507	Chr01:19418620-19418656	100	CDS	Pp3c1_26780V3.2,Pp3c1_26780V3.1				no
Pp3c1_sORF1508	Chr01:19418936-19419044	78.8	CDS	Pp3c1_26780V3.2,Pp3c1_26780V3.1				no
Pp3c1_sORF1509	Chr01:19422971-19423013	97.2	Intergenic	ID=XLOC_012732|TCONS_00021607				no
Pp3c1_sORF151	Chr01:11326283-11326490	43.9	five_prime_UTR	Pp3c1_15090V3.1				no
Pp3c1_sORF1510	Chr01:19497308-19497356	97.7	CDS	Pp3c1_27000V3.2,Pp3c1_27020V3.3				no
Pp3c1_sORF1511	Chr01:19497440-19497572	91.4	CDS	Pp3c1_27020V3.3				no
Pp3c1_sORF1512	Chr01:19497677-19497791	93.5	CDS	Pp3c1_27020V3.3	Ceratodon	Ceratodon:2.7062		no
Pp3c1_sORF1513	Chr01:19501873-19501912	99.5	five_prime_UTR	Pp3c1_27050V3.2,Pp3c1_27050V3.1				no
Pp3c1_sORF1514	Chr01:19440563-19440665	97.1	three_prime_UTR	Pp3c1_26860V3.3,Pp3c1_26860V3.2,Pp3c1_26860V3.1				no
Pp3c1_sORF1515	Chr01:19440897-19440981	93.7	CDS	Pp3c1_26860V3.3,Pp3c1_26860V3.2,Pp3c1_26860V3.1				no
Pp3c1_sORF1516	Chr01:1950874-1951036	51.8	five_prime_UTR	Pp3c1_2650V3.1,Pp3c1_2650V3.2				no
Pp3c1_sORF1517	Chr01:19446785-19446851	96.4	three_prime_UTR	Pp3c1_26860V3.2				no
Pp3c1_sORF1518	Chr01:19447717-19447753	98.5	three_prime_UTR	Pp3c1_26880V3.3,Pp3c1_26880V3.2,Pp3c1_26880V3.1,Pp3c1_26880V3.4				no
Pp3c1_sORF1519	Chr01:19448500-19448581	89.5	CDS	Pp3c1_26880V3.4				no
Pp3c1_sORF152	Chr01:11326670-11326955	42994	five_prime_UTR	Pp3c1_15090V3.1,Pp3c1_15090V3.2				no
Pp3c1_sORF1520	Chr01:19449271-19449310	99.6	CDS	Pp3c1_26880V3.4				no
Pp3c1_sORF1521	Chr01:19449478-19449586	97.4	CDS	Pp3c1_26880V3.4				no
Pp3c1_sORF1522	Chr01:19449796-19449901	79.3	CDS	Pp3c1_26880V3.4				no
Pp3c1_sORF1523	Chr01:1953101-1953158	91.5	CDS	Pp3c1_2650V3.1,Pp3c1_2650V3.2				no
Pp3c1_sORF1524	Chr01:19473650-19473698	97.3	CDS	Pp3c1_26980V3.3,Pp3c1_26980V3.1,Pp3c1_26980V3.2				no
Pp3c1_sORF1525	Chr01:19490031-19490145	98.1	CDS	Pp3c1_27000V3.2				no
Pp3c1_sORF1526	Chr01:19586704-19586809	95.8	five_prime_UTR	Pp3c1_27160V3.4,Pp3c1_27160V3.3,Pp3c1_27160V3.2,Pp3c1_27160V3.6,Pp3c1_27160V3.5				no
Pp3c1_sORF1527	Chr01:19586738-19586783	94	five_prime_UTR	Pp3c1_27160V3.4,Pp3c1_27160V3.3,Pp3c1_27160V3.2,Pp3c1_27160V3.6,Pp3c1_27160V3.1,Pp3c1_27160V3.5				no
Pp3c1_sORF1528	Chr01:19589133-19589268	75.5	three_prime_UTR	Pp3c1_27160V3.4,Pp3c1_27160V3.3,Pp3c1_27160V3.2,Pp3c1_27160V3.1,Pp3c1_27160V3.5				no
Pp3c1_sORF1529	Chr01:195916-196018	96.3	CDS	Pp3c1_390V3.2				no
Pp3c1_sORF153	Chr01:11328339-11328390	92.9	CDS	Pp3c1_15090V3.1,Pp3c1_15090V3.2				no
Pp3c1_sORF1530	Chr01:19599357-19599402	98.8	CDS	Pp3c1_27180V3.1,Pp3c1_27180V3.2,Pp3c1_27180V3.3				no
Pp3c1_sORF1531	Chr01:19601728-19601818	80.8	three_prime_UTR	Pp3c1_27180V3.1,Pp3c1_27180V3.2,Pp3c1_27180V3.3				no
Pp3c1_sORF1532	Chr01:19581302-19581398	83.5	CDS	Pp3c1_27120V3.1				no
Pp3c1_sORF1533	Chr01:19647565-19647628	94.9	lncRNA	Pp3c1_27270V3.1,Pp3c1_27270V3.2 | lncRNAs: lcl|Ppatens_Pp3c1_27270V3.1,lcl|Ppatens_Pp3c1_27270V3.2				no
Pp3c1_sORF1534	Chr01:19590535-19590604	92.5	CDS	Pp3c1_27160V3.5				no
Pp3c1_sORF1535	Chr01:19590610-19590727	97.8	CDS	Pp3c1_27170V3.4				no
Pp3c1_sORF1536	Chr01:19591006-19591090	98.9	CDS	Pp3c1_27170V3.4				no
Pp3c1_sORF1537	Chr01:19591960-19592038	97.1	CDS	Pp3c1_27170V3.4				no
Pp3c1_sORF1538	Chr01:19592233-19592488	64.3	CDS	Pp3c1_27170V3.4	Ceratodon	Ceratodon:0.97		no
Pp3c1_sORF1539	Chr01:19667134-19667167	100	Intergenic	ID=XLOC_012633|TCONS_00021403				no
Pp3c1_sORF154	Chr01:11329950-11329989	96.5	CDS	Pp3c1_15090V3.1,Pp3c1_15090V3.2				no
Pp3c1_sORF1540	Chr01:19668051-19668084	100	lncRNA	Pp3c1_27300V3.3,Pp3c1_27300V3.1 | lncRNAs: lcl|Ppatens_Pp3c1_27300V3.1				no
Pp3c1_sORF1541	Chr01:19670099-19670192	88.7	CDS	Pp3c1_27300V3.3,Pp3c1_27300V3.2				no
Pp3c1_sORF1542	Chr01:19697540-19697585	91.7	Intergenic	ID=XLOC_012636|TCONS_00021409				no
Pp3c1_sORF1543	Chr01:19697627-19697699	95	Intergenic	ID=XLOC_012636|TCONS_00021409				no
Pp3c1_sORF1544	Chr01:19697833-19697950	72	Intergenic	ID=XLOC_012636|TCONS_00021409	Ceratodon	Ceratodon:0.1367		no
Pp3c1_sORF1545	Chr01:19698444-19698480	99.1	Intergenic	ID=XLOC_012636|TCONS_00021409				no
Pp3c1_sORF1546	Chr01:19702-19756	97.9	CDS	Pp3c1_40V3.1,Pp3c1_40V3.2				no
Pp3c1_sORF1547	Chr01:19711932-19712025	98.3	CDS	Pp3c1_27440V3.2,Pp3c1_27440V3.1				no
Pp3c1_sORF1548	Chr01:19712493-19712574	96.1	three_prime_UTR	Pp3c1_27440V3.2,Pp3c1_27440V3.1				no
Pp3c1_sORF1549	Chr01:197298-197601	84.8	Interlaced	Pp3c1_390V3.2				no
Pp3c1_sORF155	Chr01:11337410-11337443	100	CDS	Pp3c1_15110V3.2				no
Pp3c1_sORF1550	Chr01:19674596-19674674	99.3	CDS	Pp3c1_27300V3.3				no
Pp3c1_sORF1551	Chr01:19676299-19676398	99.7	CDS	Pp3c1_27330V3.2				no
Pp3c1_sORF1552	Chr01:19677279-19677402	78.9	five_prime_UTR	Pp3c1_27330V3.2				no
Pp3c1_sORF1553	Chr01:19679860-19680004	84.7	three_prime_UTR	Pp3c1_27360V3.1				no
Pp3c1_sORF1554	Chr01:19680291-19680399	79.2	three_prime_UTR	Pp3c1_27360V3.1				no
Pp3c1_sORF1555	Chr01:19680666-19680735	89.5	three_prime_UTR	Pp3c1_27360V3.1				no
Pp3c1_sORF1556	Chr01:19681220-19681256	99.1	three_prime_UTR,CDS	Pp3c1_27360V3.3,Pp3c1_27360V3.6,Pp3c1_27360V3.5,Pp3c1_27360V3.2,Pp3c1_27360V3.7,Pp3c1_27360V3.4,Pp3c1_27360V3.1				no
Pp3c1_sORF1557	Chr01:19681966-19682050	88.4	CDS	Pp3c1_27360V3.3,Pp3c1_27360V3.6,Pp3c1_27360V3.5,Pp3c1_27360V3.2,Pp3c1_27360V3.7,Pp3c1_27360V3.4,Pp3c1_27360V3.1				no
Pp3c1_sORF1558	Chr01:19687368-19687440	96.1	CDS	Pp3c1_27370V3.2				no
Pp3c1_sORF1559	Chr01:19688350-19688428	98	CDS	Pp3c1_27370V3.2				no
Pp3c1_sORF156	Chr01:11339950-11339983	100	three_prime_UTR	Pp3c1_15110V3.2				no
Pp3c1_sORF1560	Chr01:19688692-19688767	93.1	CDS	Pp3c1_27370V3.2				no
Pp3c1_sORF1561	Chr01:19691272-19691311	99	CDS	Pp3c1_27370V3.2				no
Pp3c1_sORF1562	Chr01:19694591-19694648	99.5	five_prime_UTR	Pp3c1_27370V3.2			Excision	no
Pp3c1_sORF1563	Chr01:19788010-19788070	91.9	CDS	Pp3c1_27500V3.1,Pp3c1_27500V3.2				no
Pp3c1_sORF1564	Chr01:19788442-19788505	99.3	CDS	Pp3c1_27500V3.1,Pp3c1_27500V3.2				no
Pp3c1_sORF1565	Chr01:19788619-19788748	99.8	Interlaced	Pp3c1_27500V3.1,Pp3c1_27500V3.2				no
Pp3c1_sORF1566	Chr01:19828886-19828928	99.8	CDS	Pp3c1_27530V3.2				no
Pp3c1_sORF1567	Chr01:19829448-19829490	98.4	three_prime_UTR	Pp3c1_27530V3.2				no
Pp3c1_sORF1568	Chr01:19831889-19832015	61.4	lncRNA	Pp3c1_27530V3.2,Pp3c1_27530V3.1 | lncRNAs: lcl|Ppatens_Pp3c1_27530V3.1				no
Pp3c1_sORF1569	Chr01:19778058-19778289	65.9	three_prime_UTR	Pp3c1_27480V3.8,Pp3c1_27480V3.7,Pp3c1_27480V3.5,Pp3c1_27480V3.13,Pp3c1_27480V3.12,Pp3c1_27480V3.2,Pp3c1_27480V3.1,Pp3c1_27480V3.4,Pp3c1_27480V3.9,Pp3c1_27480V3.3,Pp3c1_27480V3.10,Pp3c1_27480V3.11,Pp3c1_27480V3.6	Ceratodon	Ceratodon:4.9078		no
Pp3c1_sORF157	Chr01:11344522-11344672	55.2	five_prime_UTR	Pp3c1_15130V3.4,Pp3c1_15130V3.1,Pp3c1_15130V3.3,Pp3c1_15130V3.2				no
Pp3c1_sORF1570	Chr01:19779234-19779459	94.2	three_prime_UTR	Pp3c1_27480V3.8,Pp3c1_27480V3.3,Pp3c1_27480V3.7,Pp3c1_27480V3.4	Ceratodon	Ceratodon:0.7268	Excision,Stop codon excision	no
Pp3c1_sORF1571	Chr01:19845076-19845109	97.3	Intergenic	ID=XLOC_012643|TCONS_00021416				no
Pp3c1_sORF1572	Chr01:19849483-19849765	99.2	CDS	Pp3c1_27630V3.2,Pp3c1_27630V3.1				no
Pp3c1_sORF1573	Chr01:19850032-19850203	99.9	CDS	Pp3c1_27630V3.2,Pp3c1_27630V3.1				no
Pp3c1_sORF1574	Chr01:19850344-19850398	98.7	CDS	Pp3c1_27630V3.2,Pp3c1_27630V3.1				no
Pp3c1_sORF1575	Chr01:19850773-19850884	94.4	CDS	Pp3c1_27630V3.2,Pp3c1_27630V3.1				no
Pp3c1_sORF1576	Chr01:19790937-19791084	64.8	Interlaced	Pp3c1_27500V3.2				no
Pp3c1_sORF1577	Chr01:19791096-19791147	98.9	CDS	Pp3c1_27510V3.2				no
Pp3c1_sORF1578	Chr01:19792766-19792832	98.7	five_prime_UTR	Pp3c1_27510V3.2				no
Pp3c1_sORF1579	Chr01:19888904-19889060	85.3	three_prime_UTR	Pp3c1_27760V3.1				no
Pp3c1_sORF158	Chr01:11345514-11345604	86.1	CDS	Pp3c1_15130V3.4,Pp3c1_15130V3.1,Pp3c1_15130V3.3,Pp3c1_15130V3.2	Ceratodon	Ceratodon:99		no
Pp3c1_sORF1580	Chr01:19889097-19889289	94.7	three_prime_UTR	Pp3c1_27779V3.1				no
Pp3c1_sORF1581	Chr01:19922993-19923035	97.8	three_prime_UTR	Pp3c1_27870V3.1				no
Pp3c1_sORF1582	Chr01:19865816-19865855	99.3	five_prime_UTR,CDS	Pp3c1_27670V3.1,Pp3c1_27670V3.2				no
Pp3c1_sORF1583	Chr01:19866901-19867120	40.5	five_prime_UTR	Pp3c1_27670V3.1				no
Pp3c1_sORF1584	Chr01:19867112-19867169	97.1	five_prime_UTR	Pp3c1_27670V3.1				no
Pp3c1_sORF1585	Chr01:19867537-19867630	95.6	five_prime_UTR	Pp3c1_27670V3.1				no
Pp3c1_sORF1586	Chr01:19873854-19874061	81.9	CDS	Pp3c1_27710V3.1,Pp3c1_27710V3.2				no
Pp3c1_sORF1587	Chr01:19874238-19874385	76.9	CDS	Pp3c1_27710V3.1,Pp3c1_27710V3.2				no
Pp3c1_sORF1588	Chr01:19874526-19874607	97.3	CDS	Pp3c1_27710V3.1,Pp3c1_27710V3.2				no
Pp3c1_sORF1589	Chr01:19875039-19875117	83.5	CDS	Pp3c1_27710V3.1,Pp3c1_27710V3.2				no
Pp3c1_sORF159	Chr01:11345631-11345733	99.9	CDS	Pp3c1_15130V3.4,Pp3c1_15130V3.1,Pp3c1_15130V3.3,Pp3c1_15130V3.2				no
Pp3c1_sORF1590	Chr01:19953782-19954016	44.6	lncRNA	Pp3c1_27930V3.2,Pp3c1_27930V3.1 | lncRNAs: lcl|Ppatens_Pp3c1_27930V3.1,lcl|Ppatens_Pp3c1_27930V3.2				no
Pp3c1_sORF1591	Chr01:19890651-19890834	65.3	five_prime_UTR	Pp3c1_27760V3.1				no
Pp3c1_sORF1592	Chr01:19896811-19896850	96.5	CDS	Pp3c1_27810V3.1,Pp3c1_27810V3.5,Pp3c1_27810V3.2,Pp3c1_27810V3.3,Pp3c1_27810V3.4				no
Pp3c1_sORF1593	Chr01:19968831-19968885	99.8	CDS	Pp3c1_27970V3.2,Pp3c1_27970V3.1				no
Pp3c1_sORF1594	Chr01:19903840-19903876	100	CDS	Pp3c1_27830V3.2				no
Pp3c1_sORF1595	Chr01:19905379-19905469	97.9	CDS	Pp3c1_27830V3.2				no
Pp3c1_sORF1596	Chr01:19910045-19910099	90.5	CDS	Pp3c1_27850V3.1,Pp3c1_27850V3.2				no
Pp3c1_sORF1597	Chr01:19977757-19977844	91	CDS	Pp3c1_27990V3.2,Pp3c1_27990V3.1				no
Pp3c1_sORF1598	Chr01:19913013-19913061	100	CDS	Pp3c1_27850V3.1,Pp3c1_27850V3.2				no
Pp3c1_sORF1599	Chr01:19913672-19913744	91.5	CDS	Pp3c1_27850V3.1,Pp3c1_27850V3.2				no
Pp3c1_sORF16	Chr01:10077972-10078017	99.9	three_prime_UTR	Pp3c1_13830V3.2,Pp3c1_13830V3.1				no
Pp3c1_sORF160	Chr01:11167466-11167514	91.4	CDS	Pp3c1_14810V3.1				no
Pp3c1_sORF1600	Chr01:19915373-19915406	93.3	CDS	Pp3c1_27850V3.1,Pp3c1_27850V3.2				no
Pp3c1_sORF1601	Chr01:19915838-19915895	93.9	CDS	Pp3c1_27850V3.1,Pp3c1_27850V3.2				no
Pp3c1_sORF1602	Chr01:19916258-19916291	96.1	CDS	Pp3c1_27850V3.1,Pp3c1_27850V3.2				no
Pp3c1_sORF1603	Chr01:19916429-19916567	84.2	CDS	Pp3c1_27850V3.1,Pp3c1_27850V3.2				no
Pp3c1_sORF1604	Chr01:19984012-19984156	89.7	CDS	Pp3c1_28010V3.2				no
Pp3c1_sORF1605	Chr01:19984847-19984937	89.7	CDS	Pp3c1_28010V3.2	Ceratodon	Ceratodon:0.4708		no
Pp3c1_sORF1606	Chr01:19986758-19986833	95.4	CDS	Pp3c1_28010V3.2				no
Pp3c1_sORF1607	Chr01:19988034-19988070	99.1	CDS	Pp3c1_28010V3.1,Pp3c1_28010V3.2				no
Pp3c1_sORF1608	Chr01:19988385-19988442	94.7	CDS	Pp3c1_28010V3.1,Pp3c1_28010V3.2				no
Pp3c1_sORF1609	Chr01:19989151-19989283	96.8	CDS	Pp3c1_28010V3.2	Ceratodon	Ceratodon:4.3007		no
Pp3c1_sORF161	Chr01:11350168-11350207	96.5	CDS	Pp3c1_15130V3.4,Pp3c1_15130V3.1,Pp3c1_15130V3.3,Pp3c1_15130V3.2				no
Pp3c1_sORF1610	Chr01:19990042-19990141	81.9	CDS	Pp3c1_28010V3.2				no
Pp3c1_sORF1611	Chr01:19926291-19926336	90.9	three_prime_UTR	Pp3c1_27900V3.5,Pp3c1_27900V3.4,Pp3c1_27900V3.3,Pp3c1_27900V3.1,Pp3c1_27900V3.2				no
Pp3c1_sORF1612	Chr01:19926650-19926830	99.7	CDS	Pp3c1_27900V3.5,Pp3c1_27900V3.4,Pp3c1_27900V3.3,Pp3c1_27900V3.1,Pp3c1_27900V3.2				no
Pp3c1_sORF1613	Chr01:19929180-19929417	51.6	five_prime_UTR	Pp3c1_27900V3.2,Pp3c1_27900V3.4			Stop codon excision	no
Pp3c1_sORF1614	Chr01:19999395-19999494	98.9	lncRNA	Pp3c1_28030V3.2 | lncRNAs: lcl|Ppatens_Pp3c1_28030V3.2				no
Pp3c1_sORF1615	Chr01:20003020-20003095	85.8	three_prime_UTR	Pp3c1_28050V3.2,Pp3c1_28050V3.1				no
Pp3c1_sORF1616	Chr01:20033003-20033150	94.5	lncRNA	Pp3c1_28110V3.2,Pp3c1_28110V3.3,Pp3c1_28110V3.1 | lncRNAs: lcl|Ppatens_Pp3c1_28110V3.1,lcl|Ppatens_Pp3c1_28110V3.2,lcl|Ppatens_Pp3c1_28110V3.3				no
Pp3c1_sORF1617	Chr01:20060247-20060289	90.6	Intergenic	ID=XLOC_012814|TCONS_00021764				no
Pp3c1_sORF1618	Chr01:19998262-19998439	100	CDS	Pp3c1_28020V3.1,Pp3c1_28020V3.2				no
Pp3c1_sORF1619	Chr01:20007590-20007755	86.2	CDS	Pp3c1_28060V3.1,Pp3c1_28060V3.2	Ceratodon	Ceratodon:1.8582		no
Pp3c1_sORF162	Chr01:1137981-1138065	93.6	Intergenic	ID=XLOC_011978|TCONS_00020257				no
Pp3c1_sORF1620	Chr01:20008286-20008520	38.4	five_prime_UTR	Pp3c1_28060V3.1,Pp3c1_28060V3.2				no
Pp3c1_sORF1621	Chr01:20088932-20088977	94.1	CDS	Pp3c1_28200V3.1,Pp3c1_28200V3.2				no
Pp3c1_sORF1622	Chr01:20090571-20090685	90.8	CDS	Pp3c1_28200V3.1,Pp3c1_28200V3.2				no
Pp3c1_sORF1623	Chr01:20091294-20091411	83.7	CDS	Pp3c1_28200V3.1,Pp3c1_28200V3.2				no
Pp3c1_sORF1624	Chr01:20093500-20093755	78.2	three_prime_UTR	Pp3c1_28200V3.1,Pp3c1_28200V3.2				no
Pp3c1_sORF1625	Chr01:20103-20397	40.3	three_prime_UTR	Pp3c1_40V3.2	Ceratodon	Ceratodon:0.2604		no
Pp3c1_sORF1626	Chr01:20108684-20108720	99.9	CDS	Pp3c1_28210V3.3,Pp3c1_28210V3.2,Pp3c1_28210V3.4,Pp3c1_28210V3.1				no
Pp3c1_sORF1627	Chr01:20153317-20153416	83.1	five_prime_UTR	Pp3c1_28260V3.1,Pp3c1_28260V3.2				no
Pp3c1_sORF1628	Chr01:20153351-20153423	96.5	five_prime_UTR	Pp3c1_28260V3.1,Pp3c1_28260V3.2				no
Pp3c1_sORF1629	Chr01:20153764-20153818	99.5	five_prime_UTR	Pp3c1_28260V3.1,Pp3c1_28260V3.2				no
Pp3c1_sORF163	Chr01:11404926-11404998	94.6	five_prime_UTR	Pp3c1_15220V3.1				no
Pp3c1_sORF1630	Chr01:20154060-20154195	92.1	CDS	Pp3c1_28260V3.1,Pp3c1_28260V3.2				no
Pp3c1_sORF1631	Chr01:20154282-20154414	99.2	CDS	Pp3c1_28260V3.1,Pp3c1_28260V3.2				no
Pp3c1_sORF1632	Chr01:20155295-20155451	99	CDS	Pp3c1_28260V3.1,Pp3c1_28260V3.2	Ceratodon	Ceratodon:4.0078		no
Pp3c1_sORF1633	Chr01:20156033-20156075	99.9	CDS	Pp3c1_28260V3.1,Pp3c1_28260V3.2				no
Pp3c1_sORF1634	Chr01:20156090-20156153	99.4	CDS	Pp3c1_28260V3.1,Pp3c1_28260V3.2				no
Pp3c1_sORF1635	Chr01:20156153-20156198	99.3	CDS	Pp3c1_28260V3.1,Pp3c1_28260V3.2				no
Pp3c1_sORF1636	Chr01:20161378-20161513	86.8	Intergenic	ID=XLOC_012660|TCONS_00021449,ID=XLOC_012660|TCONS_00021450				no
Pp3c1_sORF1637	Chr01:20161391-20161541	68.4	Intergenic	ID=XLOC_012660|TCONS_00021449,ID=XLOC_012660|TCONS_00021450				no
Pp3c1_sORF1638	Chr01:20161537-20161603	98.4	Intergenic	ID=XLOC_012660|TCONS_00021449				no
Pp3c1_sORF1639	Chr01:20161619-20161676	97.3	Intergenic	ID=XLOC_012660|TCONS_00021449				no
Pp3c1_sORF164	Chr01:11405195-11405345	93.6	five_prime_UTR	Pp3c1_15220V3.1				no
Pp3c1_sORF1640	Chr01:20179933-20179993	93.1	three_prime_UTR	Pp3c1_28320V3.2,Pp3c1_28320V3.1				no
Pp3c1_sORF1641	Chr01:1677878-1677914	99.9	Intergenic	ID=XLOC_022012|TCONS_00037542				no
Pp3c1_sORF1642	Chr01:20194130-20194247	99.2	CDS	Pp3c1_28340V3.1,Pp3c1_28340V3.2	Ceratodon,Sphagnum	Ceratodon:4.9254,Sphagnum:0.7365		no
Pp3c1_sORF1643	Chr01:20196121-20196295	99.4	Interlaced	Pp3c1_28340V3.1,Pp3c1_28340V3.2	Ceratodon	Ceratodon:2.2269		no
Pp3c1_sORF1644	Chr01:20219773-20219998	41	five_prime_UTR	Pp3c1_28370V3.6,Pp3c1_28370V3.3,Pp3c1_28370V3.8,Pp3c1_28370V3.7,Pp3c1_28370V3.5,Pp3c1_28370V3.2,Pp3c1_28370V3.1			Truncation	no
Pp3c1_sORF1645	Chr01:20222745-20222829	85.2	CDS	Pp3c1_28370V3.4,Pp3c1_28370V3.9,Pp3c1_28370V3.6,Pp3c1_28370V3.3,Pp3c1_28370V3.8,Pp3c1_28370V3.7,Pp3c1_28370V3.5,Pp3c1_28370V3.2,Pp3c1_28370V3.1				no
Pp3c1_sORF1646	Chr01:20226555-20226618	99.3	CDS	Pp3c1_28370V3.4,Pp3c1_28370V3.9,Pp3c1_28370V3.6,Pp3c1_28370V3.3,Pp3c1_28370V3.8,Pp3c1_28370V3.7,Pp3c1_28370V3.5,Pp3c1_28370V3.2,Pp3c1_28370V3.1				no
Pp3c1_sORF1647	Chr01:20226779-20226812	96.4	three_prime_UTR	Pp3c1_28370V3.4,Pp3c1_28370V3.9,Pp3c1_28370V3.6,Pp3c1_28370V3.3,Pp3c1_28370V3.8,Pp3c1_28370V3.7,Pp3c1_28370V3.5,Pp3c1_28370V3.2,Pp3c1_28370V3.1				no
Pp3c1_sORF1648	Chr01:20162248-20162329	92.9	three_prime_UTR	Pp3c1_28300V3.3				no
Pp3c1_sORF1649	Chr01:20235204-20235321	99.7	Interlaced	Pp3c1_28390V3.3				no
Pp3c1_sORF165	Chr01:11405647-11405704	97.7	CDS	Pp3c1_15220V3.1,Pp3c1_15220V3.2				no
Pp3c1_sORF1650	Chr01:1684504-1684561	99	five_prime_UTR	Pp3c1_2270V3.1,Pp3c1_2270V3.2				no
Pp3c1_sORF1651	Chr01:20260177-20260360	82.8	Intergenic	ID=XLOC_012666|TCONS_00021463				no
Pp3c1_sORF1652	Chr01:20260181-20260355	87.1	Intergenic	ID=XLOC_012666|TCONS_00021463				no
Pp3c1_sORF1653	Chr01:20260448-20260493	98.8	lncRNA	Pp3c1_28471V3.1 | lncRNAs: lcl|Ppatens_Pp3c1_28471V3.1				no
Pp3c1_sORF1654	Chr01:20196074-20196107	96.2	three_prime_UTR	Pp3c1_28350V3.1,Pp3c1_28350V3.2,Pp3c1_28350V3.3				no
Pp3c1_sORF1655	Chr01:20197263-20197341	88.4	three_prime_UTR	Pp3c1_28350V3.1,Pp3c1_28350V3.2,Pp3c1_28350V3.7,Pp3c1_28350V3.5,Pp3c1_28350V3.8,Pp3c1_28350V3.9,Pp3c1_28350V3.6,Pp3c1_28350V3.3,Pp3c1_28350V3.15,Pp3c1_28350V3.4,Pp3c1_28350V3.12,Pp3c1_28350V3.11,Pp3c1_28350V3.10,Pp3c1_28350V3.13,Pp3c1_28350V3.14				no
Pp3c1_sORF1656	Chr01:20198050-20198140	99.8	CDS	Pp3c1_28350V3.1,Pp3c1_28350V3.2,Pp3c1_28350V3.8,Pp3c1_28350V3.3,Pp3c1_28350V3.15,Pp3c1_28350V3.12,Pp3c1_28350V3.10,Pp3c1_28350V3.13			Start codon excision	no
Pp3c1_sORF1657	Chr01:20246732-20246879	90.6	lncRNA	Pp3c1_28420V3.1 | lncRNAs: lcl|Ppatens_Pp3c1_28420V3.1				no
Pp3c1_sORF1658	Chr01:20248205-20248322	82.3	CDS	Pp3c1_28430V3.1,Pp3c1_28430V3.2				no
Pp3c1_sORF1659	Chr01:20249021-20249318	99.9	CDS	Pp3c1_28430V3.1,Pp3c1_28430V3.2				no
Pp3c1_sORF166	Chr01:11432824-11432980	92.5	five_prime_UTR	Pp3c1_15279V3.1				no
Pp3c1_sORF1660	Chr01:20250561-20250636	88.3	five_prime_UTR	Pp3c1_28430V3.1				no
Pp3c1_sORF1661	Chr01:20316058-20316199	62.1	five_prime_UTR	Pp3c1_28480V3.1,Pp3c1_28480V3.4,Pp3c1_28480V3.2,Pp3c1_28480V3.3,Pp3c1_28480V3.6,Pp3c1_28480V3.5				no
Pp3c1_sORF1662	Chr01:20318451-20318511	97.7	CDS	Pp3c1_28480V3.6				no
Pp3c1_sORF1663	Chr01:20318514-20318670	84.8	CDS	Pp3c1_28480V3.6				no
Pp3c1_sORF1664	Chr01:20254244-20254292	99.1	CDS	Pp3c1_28460V3.1,Pp3c1_28460V3.2				no
Pp3c1_sORF1665	Chr01:20319594-20319789	100	CDS	Pp3c1_28480V3.6				no
Pp3c1_sORF1666	Chr01:20319867-20319990	98.6	CDS	Pp3c1_28480V3.6				no
Pp3c1_sORF1667	Chr01:20320335-20320473	89.6	CDS	Pp3c1_28480V3.6				no
Pp3c1_sORF1668	Chr01:20254953-20255127	99.2	CDS	Pp3c1_28460V3.1,Pp3c1_28460V3.2				no
Pp3c1_sORF1669	Chr01:20255211-20255310	98.8	CDS	Pp3c1_28460V3.1,Pp3c1_28460V3.2				no
Pp3c1_sORF167	Chr01:11434671-11434707	94.4	five_prime_UTR	Pp3c1_15290V3.3,Pp3c1_15290V3.2				no
Pp3c1_sORF1670	Chr01:20320977-20321103	96.4	CDS	Pp3c1_28480V3.6			Stop codon excision	no
Pp3c1_sORF1671	Chr01:20256695-20256746	99.6	CDS	Pp3c1_28460V3.1,Pp3c1_28460V3.2				no
Pp3c1_sORF1672	Chr01:20257133-20257175	96.6	five_prime_UTR	Pp3c1_28460V3.1,Pp3c1_28460V3.2				no
Pp3c1_sORF1673	Chr01:20257024-20257234	63.5	five_prime_UTR	Pp3c1_28460V3.1,Pp3c1_28460V3.2				no
Pp3c1_sORF1674	Chr01:20388307-20388349	99.9	Intergenic	ID=XLOC_012668|TCONS_00021466				no
Pp3c1_sORF1675	Chr01:20388355-20388397	100	Intergenic	ID=XLOC_012668|TCONS_00021466				no
Pp3c1_sORF1676	Chr01:20388628-20388679	97.5	Intergenic	ID=XLOC_012668|TCONS_00021466				no
Pp3c1_sORF1677	Chr01:20374009-20374147	60.2	three_prime_UTR	Pp3c1_28520V3.2				no
Pp3c1_sORF1678	Chr01:20377056-20377182	70.2	three_prime_UTR	Pp3c1_28520V3.2			Start codon excision,Stop codon excision	no
Pp3c1_sORF1679	Chr01:20377252-20377417	94.3	three_prime_UTR	Pp3c1_28510V3.4			Excision	no
Pp3c1_sORF168	Chr01:11434951-11435146	63.8	CDS	Pp3c1_15290V3.3,Pp3c1_15290V3.2	Ceratodon	Ceratodon:1.7816		no
Pp3c1_sORF1680	Chr01:20378470-20378503	97.1	CDS	Pp3c1_28510V3.4				no
Pp3c1_sORF1681	Chr01:20381991-20382147	73.7	Interlaced	Pp3c1_28510V3.4			Stop codon excision	no
Pp3c1_sORF1682	Chr01:20382378-20382411	98.8	five_prime_UTR	Pp3c1_28510V3.2				no
Pp3c1_sORF1683	Chr01:20456359-20456461	73.5	three_prime_UTR	Pp3c1_28610V3.1				no
Pp3c1_sORF1684	Chr01:20398610-20398682	96.5	CDS	Pp3c1_28560V3.1,Pp3c1_28560V3.2				no
Pp3c1_sORF1685	Chr01:20398724-20398775	99.2	CDS	Pp3c1_28560V3.1,Pp3c1_28560V3.2				no
Pp3c1_sORF1686	Chr01:20399869-20399986	83.1	CDS	Pp3c1_28560V3.1,Pp3c1_28560V3.2				no
Pp3c1_sORF1687	Chr01:20400748-20400808	99.2	CDS	Pp3c1_28560V3.1,Pp3c1_28560V3.2				no
Pp3c1_sORF1688	Chr01:20402058-20402091	95.7	five_prime_UTR	Pp3c1_28560V3.1,Pp3c1_28560V3.2				no
Pp3c1_sORF1689	Chr01:20407774-20407828	99.7	Intergenic	ID=XLOC_012783|TCONS_00021699				no
Pp3c1_sORF169	Chr01:11435582-11435642	97.7	three_prime_UTR	Pp3c1_15290V3.3,Pp3c1_15290V3.2				no
Pp3c1_sORF1690	Chr01:20477406-20477454	99.6	five_prime_UTR,CDS	Pp3c1_28630V3.4				no
Pp3c1_sORF1691	Chr01:20479850-20479886	100	CDS	Pp3c1_28630V3.5,Pp3c1_28630V3.6,Pp3c1_28630V3.4,Pp3c1_28630V3.2,Pp3c1_28630V3.3,Pp3c1_28630V3.1				no
Pp3c1_sORF1692	Chr01:20480548-20480614	96.7	three_prime_UTR	Pp3c1_28630V3.6				no
Pp3c1_sORF1693	Chr01:20482920-20483028	89.1	five_prime_UTR	Pp3c1_28640V3.5			Start codon excision	no
Pp3c1_sORF1694	Chr01:20483317-20483494	97.3	CDS	Pp3c1_28640V3.4,Pp3c1_28640V3.3,Pp3c1_28640V3.6,Pp3c1_28640V3.5,Pp3c1_28640V3.1,Pp3c1_28640V3.2	Ceratodon	Ceratodon:1.6241		no
Pp3c1_sORF1695	Chr01:20484040-20484238	98.9	Interlaced	Pp3c1_28640V3.4,Pp3c1_28640V3.3,Pp3c1_28640V3.6,Pp3c1_28640V3.5,Pp3c1_28640V3.1,Pp3c1_28640V3.2				no
Pp3c1_sORF1696	Chr01:20495037-20495133	98	CDS	Pp3c1_28670V3.2				no
Pp3c1_sORF1697	Chr01:20497597-20497633	96.4	CDS	Pp3c1_28670V3.2				no
Pp3c1_sORF1698	Chr01:20499170-20499311	66.6	five_prime_UTR,three_prime_UTR	Pp3c1_28670V3.2,Pp3c1_28680V3.2				no
Pp3c1_sORF1699	Chr01:20499174-20499303	67.1	five_prime_UTR,three_prime_UTR	Pp3c1_28670V3.1,Pp3c1_28680V3.2				no
Pp3c1_sORF17	Chr01:9879835-9879943	81.6	CDS	Pp3c1_13530V3.2,Pp3c1_13530V3.1				no
Pp3c1_sORF170	Chr01:11437076-11437157	92.2	lncRNA	Pp3c1_15290V3.3,Pp3c1_15294V3.1 | lncRNAs: lcl|Ppatens_Pp3c1_15294V3.1				no
Pp3c1_sORF1700	Chr01:20499880-20499964	94.6	CDS	Pp3c1_28680V3.2,Pp3c1_28680V3.1				no
Pp3c1_sORF1701	Chr01:20547870-20547948	99.5	CDS	Pp3c1_28780V3.1,Pp3c1_28780V3.2				no
Pp3c1_sORF1702	Chr01:2055413-2055530	83.8	CDS	Pp3c1_2740V3.1,Pp3c1_2740V3.2,Pp3c1_2740V3.3				no
Pp3c1_sORF1703	Chr01:20502313-20502391	94.1	three_prime_UTR	Pp3c1_28690V3.10			Excision	no
Pp3c1_sORF1704	Chr01:20502480-20502534	99.6	Interlaced	Pp3c1_28690V3.5,Pp3c1_28690V3.8,Pp3c1_28690V3.1,Pp3c1_28690V3.10,Pp3c1_28690V3.9,Pp3c1_28690V3.3,Pp3c1_28690V3.4,Pp3c1_28690V3.2,Pp3c1_28690V3.6,Pp3c1_28690V3.7				no
Pp3c1_sORF1705	Chr01:20503144-20503429	99.9	CDS	Pp3c1_28690V3.5,Pp3c1_28690V3.8,Pp3c1_28690V3.1,Pp3c1_28690V3.10,Pp3c1_28690V3.9,Pp3c1_28690V3.3,Pp3c1_28690V3.4,Pp3c1_28690V3.2,Pp3c1_28690V3.6,Pp3c1_28690V3.7				no
Pp3c1_sORF1706	Chr01:20503516-20503564	98.4	CDS	Pp3c1_28690V3.5,Pp3c1_28690V3.8,Pp3c1_28690V3.1,Pp3c1_28690V3.10,Pp3c1_28690V3.9,Pp3c1_28690V3.3,Pp3c1_28690V3.4,Pp3c1_28690V3.2,Pp3c1_28690V3.6,Pp3c1_28690V3.7				no
Pp3c1_sORF1707	Chr01:20503585-20503618	100	CDS	Pp3c1_28690V3.5,Pp3c1_28690V3.8,Pp3c1_28690V3.1,Pp3c1_28690V3.10,Pp3c1_28690V3.9,Pp3c1_28690V3.3,Pp3c1_28690V3.4,Pp3c1_28690V3.2,Pp3c1_28690V3.6,Pp3c1_28690V3.7				no
Pp3c1_sORF1708	Chr01:20503699-20503783	98.9	CDS	Pp3c1_28690V3.5,Pp3c1_28690V3.8,Pp3c1_28690V3.1,Pp3c1_28690V3.10,Pp3c1_28690V3.9,Pp3c1_28690V3.3,Pp3c1_28690V3.4,Pp3c1_28690V3.2,Pp3c1_28690V3.6,Pp3c1_28690V3.7				no
Pp3c1_sORF1709	Chr01:20504305-20504347	91.1	CDS	Pp3c1_28690V3.5,Pp3c1_28690V3.8,Pp3c1_28690V3.1,Pp3c1_28690V3.10,Pp3c1_28690V3.9,Pp3c1_28690V3.3,Pp3c1_28690V3.4,Pp3c1_28690V3.2,Pp3c1_28690V3.6,Pp3c1_28690V3.7				no
Pp3c1_sORF171	Chr01:11255547-11255580	97.7	lncRNA	Pp3c1_14930V3.2 | lncRNAs: lcl|Ppatens_Pp3c1_14930V3.2				no
Pp3c1_sORF1710	Chr01:20504386-20504449	91.6	CDS	Pp3c1_28690V3.5,Pp3c1_28690V3.8,Pp3c1_28690V3.1,Pp3c1_28690V3.10,Pp3c1_28690V3.9,Pp3c1_28690V3.3,Pp3c1_28690V3.4,Pp3c1_28690V3.2,Pp3c1_28690V3.6,Pp3c1_28690V3.7				no
Pp3c1_sORF1711	Chr01:20504587-20504662	87	CDS	Pp3c1_28690V3.5,Pp3c1_28690V3.8,Pp3c1_28690V3.1,Pp3c1_28690V3.10,Pp3c1_28690V3.9,Pp3c1_28690V3.3,Pp3c1_28690V3.4,Pp3c1_28690V3.2,Pp3c1_28690V3.6,Pp3c1_28690V3.7				no
Pp3c1_sORF1712	Chr01:20506395-20506536	98.6	five_prime_UTR	Pp3c1_28690V3.5,Pp3c1_28690V3.8,Pp3c1_28690V3.1,Pp3c1_28690V3.3,Pp3c1_28690V3.4,Pp3c1_28690V3.2,Pp3c1_28690V3.6,Pp3c1_28690V3.7				no
Pp3c1_sORF1713	Chr01:20507193-20507445	58.8	five_prime_UTR	Pp3c1_28690V3.5,Pp3c1_28690V3.8,Pp3c1_28690V3.4,Pp3c1_28690V3.6,Pp3c1_28690V3.7			Stop codon excision	no
Pp3c1_sORF1714	Chr01:2058057-2058273	95.3	CDS	Pp3c1_2740V3.1,Pp3c1_2740V3.2,Pp3c1_2740V3.3				no
Pp3c1_sORF1715	Chr01:20516605-20516656	94	CDS	Pp3c1_28730V3.3,Pp3c1_28730V3.2,Pp3c1_28730V3.1				no
Pp3c1_sORF1716	Chr01:20516677-20516776	87.1	CDS	Pp3c1_28730V3.3,Pp3c1_28730V3.2,Pp3c1_28730V3.1				no
Pp3c1_sORF1717	Chr01:20516860-20516944	94.1	Interlaced	Pp3c1_28730V3.3,Pp3c1_28730V3.2,Pp3c1_28730V3.1				no
Pp3c1_sORF1718	Chr01:20528350-20528476	83.4	CDS	Pp3c1_28750V3.2,Pp3c1_28750V3.1,Pp3c1_28750V3.3				no
Pp3c1_sORF1719	Chr01:20528614-20528650	97.5	CDS	Pp3c1_28750V3.2,Pp3c1_28750V3.1,Pp3c1_28750V3.3				no
Pp3c1_sORF172	Chr01:11438143-11438254	87.2	lncRNA	Pp3c1_15294V3.1 | lncRNAs: lcl|Ppatens_Pp3c1_15294V3.1				no
Pp3c1_sORF1720	Chr01:20529469-20529553	97.3	CDS	Pp3c1_28750V3.2,Pp3c1_28750V3.1,Pp3c1_28750V3.3				no
Pp3c1_sORF1721	Chr01:20529775-20529823	98	CDS	Pp3c1_28750V3.3				no
Pp3c1_sORF1722	Chr01:20529856-20529982	86	CDS	Pp3c1_28750V3.3				no
Pp3c1_sORF1723	Chr01:20531055-20531094	98.9	CDS	Pp3c1_28750V3.3				no
Pp3c1_sORF1724	Chr01:20532712-20532772	92.2	CDS	Pp3c1_28750V3.3				no
Pp3c1_sORF1725	Chr01:20535712-20535784	96.1	five_prime_UTR	Pp3c1_28750V3.3			Stop codon excision	no
Pp3c1_sORF1726	Chr01:20538142-20538382	42940	Interlaced	Pp3c1_28760V3.2,Pp3c1_28760V3.1	Ceratodon	Ceratodon:1.0108		no
Pp3c1_sORF1727	Chr01:20539306-20539489	93.3	CDS	Pp3c1_28760V3.2,Pp3c1_28760V3.1	Ceratodon	Ceratodon:1.8056		no
Pp3c1_sORF1728	Chr01:20540567-20540630	91.8	CDS	Pp3c1_28760V3.2,Pp3c1_28760V3.1				no
Pp3c1_sORF1729	Chr01:20618494-20618584	94.3	CDS	Pp3c1_28900V3.1				no
Pp3c1_sORF173	Chr01:11293291-11293378	94.7	three_prime_UTR	Pp3c1_14980V3.1,Pp3c1_14980V3.2,Pp3c1_14980V3.3				no
Pp3c1_sORF1730	Chr01:20618635-20618749	100	CDS	Pp3c1_28900V3.1				no
Pp3c1_sORF1731	Chr01:20655335-20655407	97.4	lncRNA	Pp3c1_28940V3.1 | lncRNAs: TCONS_00024180_100,lcl|Ppatens_Pp3c1_28940V3.1				no
Pp3c1_sORF1732	Chr01:20660615-20660666	97.6	CDS	Pp3c1_28940V3.2,Pp3c1_28970V3.1				no
Pp3c1_sORF1733	Chr01:20660907-20661051	72.5	CDS	Pp3c1_28970V3.1				no
Pp3c1_sORF1734	Chr01:20662029-20662107	99.9	CDS	Pp3c1_28970V3.1				no
Pp3c1_sORF1735	Chr01:20662317-20662398	92.4	CDS	Pp3c1_28970V3.1				no
Pp3c1_sORF1736	Chr01:20598605-20598647	98.9	three_prime_UTR	Pp3c1_28860V3.1,Pp3c1_28860V3.2				no
Pp3c1_sORF1737	Chr01:20663953-20663989	94.4	CDS	Pp3c1_28980V3.2,Pp3c1_28980V3.3,Pp3c1_28980V3.1,Pp3c1_28980V3.4,Pp3c1_28980V3.5				no
Pp3c1_sORF1738	Chr01:20598806-20598980	91.3	Interlaced	Pp3c1_28860V3.1,Pp3c1_28860V3.2				no
Pp3c1_sORF1739	Chr01:20664579-20664618	100	CDS	Pp3c1_28980V3.2,Pp3c1_28980V3.3,Pp3c1_28980V3.1,Pp3c1_28980V3.4,Pp3c1_28980V3.5				no
Pp3c1_sORF174	Chr01:11294546-11294579	100	CDS	Pp3c1_14980V3.1,Pp3c1_14980V3.2,Pp3c1_14980V3.3				no
Pp3c1_sORF1740	Chr01:20664636-20664708	93.7	CDS	Pp3c1_28980V3.2,Pp3c1_28980V3.3,Pp3c1_28980V3.1,Pp3c1_28980V3.4,Pp3c1_28980V3.5				no
Pp3c1_sORF1741	Chr01:20665216-20665342	76.5	CDS	Pp3c1_28980V3.2,Pp3c1_28980V3.3,Pp3c1_28980V3.1,Pp3c1_28980V3.4,Pp3c1_28980V3.5				no
Pp3c1_sORF1742	Chr01:20678514-20678559	90.9	lncRNA	Pp3c1_29020V3.2,Pp3c1_29020V3.1 | lncRNAs: lcl|Ppatens_Pp3c1_29020V3.1				no
Pp3c1_sORF1743	Chr01:20699757-20699877	80.2	CDS	Pp3c1_29030V3.1,Pp3c1_29030V3.3,Pp3c1_29030V3.2				no
Pp3c1_sORF1744	Chr01:20699910-20699985	96.4	CDS	Pp3c1_29030V3.1,Pp3c1_29030V3.3,Pp3c1_29030V3.2				no
Pp3c1_sORF1745	Chr01:20650174-20650234	90.8	three_prime_UTR	Pp3c1_28930V3.2,Pp3c1_28930V3.5,Pp3c1_28930V3.3,Pp3c1_28930V3.6,Pp3c1_28930V3.4,Pp3c1_28930V3.1				no
Pp3c1_sORF1746	Chr01:20650323-20650410	90.9	three_prime_UTR	Pp3c1_28930V3.5,Pp3c1_28930V3.4			Excision	no
Pp3c1_sORF1747	Chr01:20650663-20650753	99.4	CDS	Pp3c1_28930V3.2,Pp3c1_28930V3.5,Pp3c1_28930V3.3,Pp3c1_28930V3.6,Pp3c1_28930V3.4,Pp3c1_28930V3.1				no
Pp3c1_sORF1748	Chr01:20650849-20651026	98.5	CDS	Pp3c1_28930V3.2,Pp3c1_28930V3.5,Pp3c1_28930V3.3,Pp3c1_28930V3.6,Pp3c1_28930V3.4,Pp3c1_28930V3.1				no
Pp3c1_sORF1749	Chr01:20652170-20652224	99.7	CDS	Pp3c1_28930V3.2,Pp3c1_28930V3.5,Pp3c1_28930V3.3,Pp3c1_28930V3.6,Pp3c1_28930V3.4,Pp3c1_28930V3.1				no
Pp3c1_sORF175	Chr01:11308328-11308502	100	CDS	Pp3c1_15011V3.1,Pp3c1_15010V3.2	Ceratodon	Ceratodon:0.7207		no
Pp3c1_sORF1750	Chr01:20652475-20652529	91	CDS	Pp3c1_28930V3.2,Pp3c1_28930V3.5,Pp3c1_28930V3.3,Pp3c1_28930V3.6,Pp3c1_28930V3.4,Pp3c1_28930V3.1				no
Pp3c1_sORF1751	Chr01:20652765-20652840	99.1	CDS	Pp3c1_28930V3.2,Pp3c1_28930V3.5,Pp3c1_28930V3.3,Pp3c1_28930V3.6,Pp3c1_28930V3.4,Pp3c1_28930V3.1				no
Pp3c1_sORF1752	Chr01:20653432-20653495	100	CDS	Pp3c1_28930V3.2,Pp3c1_28930V3.5,Pp3c1_28930V3.3,Pp3c1_28930V3.6,Pp3c1_28930V3.4,Pp3c1_28930V3.1				no
Pp3c1_sORF1753	Chr01:20723939-20723972	100	CDS	Pp3c1_29082V3.4				no
Pp3c1_sORF1754	Chr01:20725650-20725761	79.6	three_prime_UTR	Pp3c1_29090V3.3,Pp3c1_29090V3.1			Start codon excision	no
Pp3c1_sORF1755	Chr01:20725771-20725828	99.2	three_prime_UTR	Pp3c1_29090V3.2,Pp3c1_29090V3.4,Pp3c1_29090V3.3,Pp3c1_29090V3.1				no
Pp3c1_sORF1756	Chr01:20666692-20666776	91	CDS	Pp3c1_28990V3.2,Pp3c1_28990V3.3,Pp3c1_28990V3.1				no
Pp3c1_sORF1757	Chr01:20666996-20667032	99	CDS	Pp3c1_28990V3.2,Pp3c1_28990V3.3,Pp3c1_28990V3.1				no
Pp3c1_sORF1758	Chr01:20668180-20668234	99.6	five_prime_UTR	Pp3c1_28990V3.2				no
Pp3c1_sORF1759	Chr01:20738773-20738854	87.4	lncRNA	ID=XLOC_012687|TCONS_00021502,ID=XLOC_012687|TCONS_00021501,ID=XLOC_012687|TCONS_00021503 | lncRNAs: TCONS_00024189_100,TCONS_00024190_100,TCONS_00024191_100				no
Pp3c1_sORF176	Chr01:11308577-11308682	84.8	CDS	Pp3c1_15011V3.1,Pp3c1_15010V3.2				no
Pp3c1_sORF1760	Chr01:20738907-20738952	99	lncRNA	ID=XLOC_012687|TCONS_00021502,ID=XLOC_012687|TCONS_00021501,ID=XLOC_012687|TCONS_00021503 | lncRNAs: TCONS_00024189_100,TCONS_00024190_100,TCONS_00024191_100				no
Pp3c1_sORF1761	Chr01:20739174-20739282	94.4	lncRNA	ID=XLOC_012687|TCONS_00021502,ID=XLOC_012687|TCONS_00021501,ID=XLOC_012687|TCONS_00021503 | lncRNAs: TCONS_00024191_100				no
Pp3c1_sORF1762	Chr01:20741057-20741138	89.1	CDS	Pp3c1_29130V3.2,Pp3c1_29130V3.1				no
Pp3c1_sORF1763	Chr01:20742164-20742350	98.4	CDS	Pp3c1_29130V3.2,Pp3c1_29130V3.1				no
Pp3c1_sORF1764	Chr01:20773967-20774045	86.6	five_prime_UTR	Pp3c1_29160V3.2				no
Pp3c1_sORF1765	Chr01:20775097-20775337	62.7	CDS	Pp3c1_29170V3.2,Pp3c1_29170V3.3,Pp3c1_29170V3.5,Pp3c1_29170V3.1,Pp3c1_29170V3.4				no
Pp3c1_sORF1766	Chr01:20775206-20775416	50	CDS	Pp3c1_29170V3.2,Pp3c1_29170V3.3,Pp3c1_29170V3.5,Pp3c1_29170V3.1,Pp3c1_29170V3.4				no
Pp3c1_sORF1767	Chr01:20776555-20776612	98	CDS	Pp3c1_29170V3.4				no
Pp3c1_sORF1768	Chr01:20712417-20712633	83.9	lncRNA	Pp3c1_29050V3.2 | lncRNAs: lcl|Ppatens_Pp3c1_29050V3.2				no
Pp3c1_sORF1769	Chr01:20780659-20780770	75.1	CDS	Pp3c1_29170V3.4				no
Pp3c1_sORF177	Chr01:11309069-11309195	79.7	Interlaced	Pp3c1_15011V3.1,Pp3c1_15010V3.2				no
Pp3c1_sORF1770	Chr01:20715948-20716011	99.3	three_prime_UTR,CDS	Pp3c1_29082V3.3,Pp3c1_29082V3.4,Pp3c1_29080V3.1,Pp3c1_29082V3.2,Pp3c1_29082V3.1				no
Pp3c1_sORF1771	Chr01:20782454-20782532	93.7	CDS	Pp3c1_29170V3.4				no
Pp3c1_sORF1772	Chr01:20717799-20717832	99.5	CDS	Pp3c1_29082V3.3,Pp3c1_29082V3.4,Pp3c1_29080V3.1,Pp3c1_29082V3.2,Pp3c1_29082V3.1				no
Pp3c1_sORF1773	Chr01:20717892-20717952	90.8	CDS	Pp3c1_29082V3.3,Pp3c1_29082V3.4,Pp3c1_29080V3.1,Pp3c1_29082V3.2,Pp3c1_29082V3.1				no
Pp3c1_sORF1774	Chr01:20718066-20718180	100	CDS	Pp3c1_29082V3.3,Pp3c1_29082V3.4,Pp3c1_29080V3.1,Pp3c1_29082V3.2,Pp3c1_29082V3.1	Ceratodon	Ceratodon:4.5965		no
Pp3c1_sORF1775	Chr01:20784599-20784647	95.3	three_prime_UTR	Pp3c1_29170V3.4				no
Pp3c1_sORF1776	Chr01:20785270-20785312	97.8	three_prime_UTR	Pp3c1_29179V3.1				no
Pp3c1_sORF1777	Chr01:20785417-20785519	79.9	three_prime_UTR	Pp3c1_29179V3.1				no
Pp3c1_sORF1778	Chr01:20720556-20720604	92.7	five_prime_UTR	Pp3c1_29082V3.3,Pp3c1_29082V3.4,Pp3c1_29080V3.1,Pp3c1_29082V3.2,Pp3c1_29082V3.1				no
Pp3c1_sORF1779	Chr01:20720646-20720682	96.6	five_prime_UTR	Pp3c1_29082V3.3,Pp3c1_29082V3.4,Pp3c1_29080V3.1,Pp3c1_29082V3.2,Pp3c1_29082V3.1				no
Pp3c1_sORF178	Chr01:11309182-11309278	85.2	five_prime_UTR	Pp3c1_15011V3.1,Pp3c1_15010V3.2				no
Pp3c1_sORF1780	Chr01:20758760-20758796	95.4	three_prime_UTR	Pp3c1_29150V3.3,Pp3c1_29150V3.5,Pp3c1_29150V3.2,Pp3c1_29150V3.6,Pp3c1_29150V3.1,Pp3c1_29150V3.4				no
Pp3c1_sORF1781	Chr01:20764196-20764331	88.7	three_prime_UTR	Pp3c1_29160V3.1,Pp3c1_29160V3.2				no
Pp3c1_sORF1782	Chr01:20764273-20764393	89.4	three_prime_UTR	Pp3c1_29160V3.1,Pp3c1_29160V3.2				no
Pp3c1_sORF1783	Chr01:20768141-20768183	89.8	CDS	Pp3c1_29160V3.1,Pp3c1_29160V3.2				no
Pp3c1_sORF1784	Chr01:20784802-20784910	99.7	lncRNA	Pp3c1_29179V3.1 | lncRNAs: lcl|Ppatens_Pp3c1_29179V3.1				no
Pp3c1_sORF1786	Chr01:20785415-20785583	74.9	lncRNA	Pp3c1_29179V3.1 | lncRNAs: lcl|Ppatens_Pp3c1_29179V3.1				no
Pp3c1_sORF1787	Chr01:20896662-20896824	59.6	CDS	Pp3c1_29260V3.2,Pp3c1_29260V3.1	Ceratodon	Ceratodon:0.5834		no
Pp3c1_sORF1788	Chr01:21000438-21000543	92.2	five_prime_UTR	Pp3c1_29330V3.1				no
Pp3c1_sORF1789	Chr01:21000893-21001037	74.7	five_prime_UTR	Pp3c1_29330V3.1			Stop codon excision	no
Pp3c1_sORF179	Chr01:11310028-11310316	38.8	five_prime_UTR	Pp3c1_15011V3.1				no
Pp3c1_sORF1790	Chr01:21002827-21002875	90.1	CDS	Pp3c1_29330V3.1				no
Pp3c1_sORF1791	Chr01:21004090-21004123	98.1	CDS	Pp3c1_29330V3.2,Pp3c1_29330V3.3,Pp3c1_29330V3.1				no
Pp3c1_sORF1792	Chr01:21005865-21005925	94.4	Interlaced	Pp3c1_29330V3.1				no
Pp3c1_sORF1793	Chr01:21016771-21016810	97.8	five_prime_UTR	Pp3c1_29340V3.1				no
Pp3c1_sORF1794	Chr01:21016820-21017060	44.2	Interlaced	Pp3c1_29340V3.1	Ceratodon	Ceratodon:1.0293		no
Pp3c1_sORF1795	Chr01:21017213-21017345	99.9	CDS	Pp3c1_29340V3.1,Pp3c1_29340V3.2				no
Pp3c1_sORF1796	Chr01:21018043-21018331	42937	three_prime_UTR	Pp3c1_29340V3.1,Pp3c1_29340V3.2				no
Pp3c1_sORF1797	Chr01:21018071-21018239	89.9	three_prime_UTR	Pp3c1_29340V3.1,Pp3c1_29340V3.2				no
Pp3c1_sORF1798	Chr01:21029358-21029526	72.1	five_prime_UTR,CDS	Pp3c1_29360V3.2,Pp3c1_29360V3.6,Pp3c1_29360V3.10,Pp3c1_29360V3.1,Pp3c1_29360V3.8,Pp3c1_29360V3.12,Pp3c1_29360V3.13,Pp3c1_29360V3.9,Pp3c1_29360V3.15,Pp3c1_29360V3.4,Pp3c1_29360V3.5,Pp3c1_29360V3.11,Pp3c1_29360V3.14,Pp3c1_29360V3.3,Pp3c1_29360V3.7				no
Pp3c1_sORF1799	Chr01:21030112-21030181	90.6	five_prime_UTR	Pp3c1_29360V3.10,Pp3c1_29360V3.8,Pp3c1_29360V3.12,Pp3c1_29360V3.13,Pp3c1_29360V3.3			Excision	no
Pp3c1_sORF18	Chr01:9905686-9905743	99.9	CDS	Pp3c1_13600V3.1,Pp3c1_13600V3.2,Pp3c1_13600V3.3,Pp3c1_13600V3.4				no
Pp3c1_sORF180	Chr01:11310128-11310416	36.4	five_prime_UTR	Pp3c1_15011V3.1				no
Pp3c1_sORF1800	Chr01:21030415-21030511	85.6	five_prime_UTR	Pp3c1_29360V3.4			Excision,Stop codon excision	no
Pp3c1_sORF1801	Chr01:21032710-21032806	99.3	Interlaced	Pp3c1_29360V3.2,Pp3c1_29360V3.6,Pp3c1_29360V3.10,Pp3c1_29360V3.1,Pp3c1_29360V3.8,Pp3c1_29360V3.12,Pp3c1_29360V3.13,Pp3c1_29360V3.9,Pp3c1_29360V3.15,Pp3c1_29360V3.4,Pp3c1_29360V3.5,Pp3c1_29360V3.11,Pp3c1_29360V3.14,Pp3c1_29360V3.3,Pp3c1_29360V3.7				no
Pp3c1_sORF1802	Chr01:21037620-21037737	82.3	five_prime_UTR	Pp3c1_29390V3.2,Pp3c1_29390V3.1				no
Pp3c1_sORF1803	Chr01:20973756-20973876	96.7	CDS	Pp3c1_29300V3.2,Pp3c1_29300V3.1				no
Pp3c1_sORF1804	Chr01:20975991-20976135	98.3	CDS	Pp3c1_29300V3.2,Pp3c1_29300V3.1				no
Pp3c1_sORF1805	Chr01:21041743-21041851	94.6	three_prime_UTR	Pp3c1_29390V3.2,Pp3c1_29390V3.1				no
Pp3c1_sORF1806	Chr01:21064390-21064510	99.9	CDS	Pp3c1_29470V3.2,Pp3c1_29470V3.1				no
Pp3c1_sORF1807	Chr01:21064516-21064690	96.1	CDS	Pp3c1_29470V3.2,Pp3c1_29470V3.1				no
Pp3c1_sORF1808	Chr01:21064756-21064792	98.9	CDS	Pp3c1_29470V3.2,Pp3c1_29470V3.1				no
Pp3c1_sORF1809	Chr01:21065074-21065290	66.3	Interlaced	Pp3c1_29470V3.2,Pp3c1_29470V3.1				no
Pp3c1_sORF181	Chr01:11310451-11310577	78.9	five_prime_UTR	Pp3c1_15011V3.1				no
Pp3c1_sORF1810	Chr01:21015092-21015296	79.3	three_prime_UTR	Pp3c1_29350V3.1				no
Pp3c1_sORF1811	Chr01:21015171-21015306	98.3	three_prime_UTR	Pp3c1_29350V3.1				no
Pp3c1_sORF1812	Chr01:21017134-21017407	32.4	five_prime_UTR	Pp3c1_29350V3.1	Ceratodon	Ceratodon:1.6201		no
Pp3c1_sORF1813	Chr01:21017895-21018045	90.9	five_prime_UTR	Pp3c1_29350V3.1				no
Pp3c1_sORF1814	Chr01:21037168-21037201	94.7	five_prime_UTR	Pp3c1_29380V3.2,Pp3c1_29380V3.1				no
Pp3c1_sORF1815	Chr01:21044035-21044137	99.7	Interlaced	Pp3c1_29420V3.2,Pp3c1_29420V3.1				no
Pp3c1_sORF1816	Chr01:21049014-21049218	82.6	three_prime_UTR	Pp3c1_29420V3.2			Excision	no
Pp3c1_sORF1817	Chr01:21049271-21049361	96.5	three_prime_UTR	Pp3c1_29440V3.21			Stop codon excision	no
Pp3c1_sORF1818	Chr01:21049881-21050025	86.5	Interlaced	Pp3c1_29440V3.21	Ceratodon	Ceratodon:0.325	Start codon excision	no
Pp3c1_sORF1819	Chr01:21053241-21053295	91	CDS	Pp3c1_29440V3.20,Pp3c1_29440V3.24,Pp3c1_29440V3.4,Pp3c1_29440V3.21,Pp3c1_29440V3.9,Pp3c1_29440V3.14,Pp3c1_29440V3.5,Pp3c1_29440V3.15,Pp3c1_29440V3.11,Pp3c1_29440V3.2,Pp3c1_29440V3.17,Pp3c1_29440V3.3,Pp3c1_29440V3.23,Pp3c1_29440V3.18,Pp3c1_29440V3.10,Pp3c1_29440V3.16,Pp3c1_29440V3.22,Pp3c1_29440V3.8,Pp3c1_29440V3.7,Pp3c1_29440V3.13,Pp3c1_29440V3.25,Pp3c1_29440V3.26,Pp3c1_29440V3.19,Pp3c1_29440V3.1…				no
Pp3c1_sORF182	Chr01:11316692-11316755	88.2	three_prime_UTR	Pp3c1_15060V3.16,Pp3c1_15060V3.15,Pp3c1_15040V3.1				no
Pp3c1_sORF1820	Chr01:21054479-21054596	97.6	CDS	Pp3c1_29440V3.21				no
Pp3c1_sORF1821	Chr01:21056845-21056905	95	CDS	Pp3c1_29440V3.21				no
Pp3c1_sORF1822	Chr01:21072362-21072410	96.2	lncRNA	Pp3c1_29500V3.1 | lncRNAs: lcl|Ppatens_Pp3c1_29500V3.1				no
Pp3c1_sORF1823	Chr01:21156050-21156140	91.8	CDS	Pp3c1_29560V3.1,Pp3c1_29560V3.2				no
Pp3c1_sORF1824	Chr01:21159132-21159183	92.4	CDS	Pp3c1_29560V3.1,Pp3c1_29560V3.2				no
Pp3c1_sORF1825	Chr01:21160072-21160156	94.5	CDS	Pp3c1_29560V3.1,Pp3c1_29560V3.2				no
Pp3c1_sORF1826	Chr01:21160361-21160421	98.2	CDS	Pp3c1_29560V3.1,Pp3c1_29560V3.2				no
Pp3c1_sORF1827	Chr01:21161606-21161663	94.7	CDS	Pp3c1_29560V3.1,Pp3c1_29560V3.2				no
Pp3c1_sORF1828	Chr01:21171916-21171958	93.3	five_prime_UTR	Pp3c1_29600V3.1,Pp3c1_29600V3.2,Pp3c1_29600V3.3,Pp3c1_29600V3.4				no
Pp3c1_sORF1829	Chr01:21173961-21174114	61.9	CDS	Pp3c1_29600V3.1,Pp3c1_29600V3.2,Pp3c1_29600V3.3,Pp3c1_29600V3.4				no
Pp3c1_sORF183	Chr01:11317158-11317200	97.8	CDS	Pp3c1_15060V3.16,Pp3c1_15060V3.15,Pp3c1_15060V3.1			Start codon excision	no
Pp3c1_sORF1830	Chr01:21175059-21175146	88.5	CDS	Pp3c1_29600V3.1,Pp3c1_29600V3.2,Pp3c1_29600V3.3,Pp3c1_29600V3.4				no
Pp3c1_sORF1831	Chr01:21176165-21176318	94.7	three_prime_UTR	Pp3c1_29600V3.1,Pp3c1_29600V3.2,Pp3c1_29600V3.3,Pp3c1_29600V3.4				no
Pp3c1_sORF1832	Chr01:21176955-21177114	59	three_prime_UTR	Pp3c1_29600V3.1,Pp3c1_29600V3.2,Pp3c1_29600V3.3,Pp3c1_29600V3.4	Ceratodon,Sphagnum,Spirodela	Ceratodon:1.1097,Sphagnum:0.9397,Spirodela:1.0177		no
Pp3c1_sORF1833	Chr01:21176900-21177029	90	CDS	Pp3c1_29610V3.1,Pp3c1_29610V3.2				no
Pp3c1_sORF1834	Chr01:21178936-21178987	97.4	CDS	Pp3c1_29610V3.1,Pp3c1_29610V3.2				no
Pp3c1_sORF1835	Chr01:21183632-21183671	97.7	three_prime_UTR	Pp3c1_29610V3.2				no
Pp3c1_sORF1836	Chr01:21205288-21205390	83.6	CDS	Pp3c1_29660V3.2,Pp3c1_29660V3.1				no
Pp3c1_sORF1837	Chr01:21205836-21205890	91.7	CDS	Pp3c1_29660V3.2,Pp3c1_29660V3.1				no
Pp3c1_sORF1838	Chr01:21207494-21207605	83.8	CDS	Pp3c1_29660V3.2,Pp3c1_29660V3.1	Ceratodon	Ceratodon:6.1758		no
Pp3c1_sORF1839	Chr01:21273102-21273210	98.3	CDS	Pp3c1_29770V3.2,Pp3c1_29770V3.1				no
Pp3c1_sORF184	Chr01:11317279-11317474	77.6	CDS	Pp3c1_15060V3.16,Pp3c1_15060V3.15,Pp3c1_15060V3.1			Stop codon excision	no
Pp3c1_sORF1840	Chr01:21273240-21273315	99.8	CDS	Pp3c1_29770V3.2,Pp3c1_29770V3.1				no
Pp3c1_sORF1841	Chr01:21208181-21208238	97.3	CDS	Pp3c1_29660V3.2,Pp3c1_29660V3.1				no
Pp3c1_sORF1842	Chr01:21208274-21208373	96.9	CDS	Pp3c1_29660V3.2,Pp3c1_29660V3.1				no
Pp3c1_sORF1843	Chr01:21273562-21273676	78.3	three_prime_UTR	Pp3c1_29770V3.2,Pp3c1_29770V3.1				no
Pp3c1_sORF1844	Chr01:21238836-21238956	95.2	CDS	Pp3c1_29700V3.1,Pp3c1_29700V3.2				no
Pp3c1_sORF1845	Chr01:20974206-20974245	98	CDS	Pp3c1_29300V3.2,Pp3c1_29300V3.1				no
Pp3c1_sORF1846	Chr01:21241075-21241219	93.2	CDS	Pp3c1_29700V3.1,Pp3c1_29700V3.2				no
Pp3c1_sORF1847	Chr01:21313387-21313555	87.5	five_prime_UTR	Pp3c1_29850V3.2				no
Pp3c1_sORF1848	Chr01:21313664-21313706	97.7	five_prime_UTR	Pp3c1_29920V3.2				no
Pp3c1_sORF1849	Chr01:21313804-21313855	97.5	five_prime_UTR	Pp3c1_29920V3.2				no
Pp3c1_sORF185	Chr01:11320808-11320856	93.1	five_prime_UTR,CDS	Pp3c1_15060V3.1			Excision	no
Pp3c1_sORF1850	Chr01:21314566-21314698	97.1	CDS	Pp3c1_29920V3.2				no
Pp3c1_sORF1851	Chr01:21314785-21314986	100	CDS	Pp3c1_29920V3.2	Ceratodon	Ceratodon:7.271		no
Pp3c1_sORF1852	Chr01:21315028-21315124	91.9	CDS	Pp3c1_29920V3.2				no
Pp3c1_sORF1853	Chr01:21316787-21316838	93.1	CDS	Pp3c1_29920V3.2				no
Pp3c1_sORF1854	Chr01:21317308-21317407	94.9	CDS	Pp3c1_29920V3.2				no
Pp3c1_sORF1855	Chr01:21317387-21317420	96.9	CDS	Pp3c1_29920V3.2				no
Pp3c1_sORF1856	Chr01:21318628-21318682	97.1	CDS	Pp3c1_29920V3.2				no
Pp3c1_sORF1857	Chr01:21318743-21318788	98.7	CDS	Pp3c1_29920V3.2				no
Pp3c1_sORF1858	Chr01:21320425-21320479	96.7	three_prime_UTR	Pp3c1_29920V3.2				no
Pp3c1_sORF1859	Chr01:21320667-21320730	90.1	three_prime_UTR	Pp3c1_29920V3.2				no
Pp3c1_sORF186	Chr01:11325706-11325781	99.1	lncRNA	Pp3c1_15080V3.1 | lncRNAs: lcl|Ppatens_Pp3c1_15080V3.1				no
Pp3c1_sORF1860	Chr01:21341740-21341908	87.7	five_prime_UTR	Pp3c1_29970V3.2,Pp3c1_29970V3.3,Pp3c1_29970V3.1				no
Pp3c1_sORF1861	Chr01:21276530-21276665	77.2	Intergenic	ID=XLOC_008961|TCONS_00015244				no
Pp3c1_sORF1862	Chr01:21341817-21341955	93.6	five_prime_UTR	Pp3c1_29970V3.2,Pp3c1_29970V3.3,Pp3c1_29970V3.1				no
Pp3c1_sORF1863	Chr01:21341966-21342188	46.9	five_prime_UTR	Pp3c1_29970V3.2,Pp3c1_29970V3.3,Pp3c1_29970V3.1				no
Pp3c1_sORF1864	Chr01:21343588-21343660	99.3	CDS	Pp3c1_29970V3.2,Pp3c1_29970V3.3,Pp3c1_29970V3.4,Pp3c1_29970V3.1				no
Pp3c1_sORF1865	Chr01:21279971-21280004	97.3	CDS	Pp3c1_29810V3.4				no
Pp3c1_sORF1866	Chr01:21284770-21284890	78.7	five_prime_UTR	Pp3c1_29810V3.4				no
Pp3c1_sORF1867	Chr01:21285941-21286046	95.6	five_prime_UTR	Pp3c1_29830V3.2	Ceratodon	Ceratodon:0.1229		no
Pp3c1_sORF1868	Chr01:21286874-21287135	58.5	Interlaced	Pp3c1_29840V3.2,Pp3c1_29840V3.1	Ceratodon	Ceratodon:0.7503		no
Pp3c1_sORF1869	Chr01:21288679-21288760	86.4	CDS	Pp3c1_29840V3.2,Pp3c1_29840V3.1				no
Pp3c1_sORF187	Chr01:11333488-11333557	87.7	lncRNA	Pp3c1_15100V3.1,Pp3c1_15100V3.5,Pp3c1_15100V3.4,Pp3c1_15100V3.3,Pp3c1_15100V3.2 | lncRNAs: lcl|Ppatens_Pp3c1_15100V3.3,lcl|Ppatens_Pp3c1_15100V3.4				no
Pp3c1_sORF1870	Chr01:21289707-21289791	97.7	lncRNA	Pp3c1_29840V3.2,Pp3c1_29850V3.2 | lncRNAs: lcl|Ppatens_Pp3c1_29850V3.2				no
Pp3c1_sORF1871	Chr01:21290424-21290625	77.5	lncRNA	Pp3c1_29850V3.2 | lncRNAs: lcl|Ppatens_Pp3c1_29850V3.2				no
Pp3c1_sORF1872	Chr01:21290739-21290895	92.4	lncRNA	Pp3c1_29850V3.2 | lncRNAs: lcl|Ppatens_Pp3c1_29850V3.2				no
Pp3c1_sORF1873	Chr01:21292496-21292562	98.3	lncRNA	Pp3c1_29850V3.2 | lncRNAs: lcl|Ppatens_Pp3c1_29850V3.2				no
Pp3c1_sORF1874	Chr01:21326557-21326611	97.8	CDS	Pp3c1_29930V3.1				no
Pp3c1_sORF1875	Chr01:21340680-21340725	92.6	lncRNA	Pp3c1_29960V3.1,Pp3c1_29960V3.2 | lncRNAs: lcl|Ppatens_Pp3c1_29960V3.1,lcl|Ppatens_Pp3c1_29960V3.2				no
Pp3c1_sORF1876	Chr01:21371614-21371803	87.5	CDS	Pp3c1_30010V3.1				no
Pp3c1_sORF1877	Chr01:21443011-21443167	68.8	CDS	Pp3c1_30120V3.2,Pp3c1_30120V3.1	Ceratodon,Morchantia,Oryza,Selaginella,Zea	Ceratodon:99,Morchantia:2.8164,Oryza:1.61,Zea:1.4612,Selaginella:13.4463		no
Pp3c1_sORF1878	Chr01:21443425-21443539	92.9	CDS	Pp3c1_30120V3.2,Pp3c1_30120V3.1				no
Pp3c1_sORF1879	Chr01:21443743-21443821	86.2	Interlaced	Pp3c1_30120V3.2,Pp3c1_30120V3.1				no
Pp3c1_sORF188	Chr01:11523908-11523941	99.5	CDS	Pp3c1_15380V3.2,Pp3c1_15380V3.1				no
Pp3c1_sORF1880	Chr01:21444919-21445009	96.1	five_prime_UTR	Pp3c1_30120V3.2				no
Pp3c1_sORF1881	Chr01:21447382-21447511	99.7	CDS	Pp3c1_30130V3.1				no
Pp3c1_sORF1882	Chr01:21459388-21459445	97.1	lncRNA	Pp3c1_30150V3.2 | lncRNAs: lcl|Ppatens_Pp3c1_30150V3.2				no
Pp3c1_sORF1883	Chr01:21460276-21460462	82.6	lncRNA	Pp3c1_30150V3.2 | lncRNAs: lcl|Ppatens_Pp3c1_30150V3.2				no
Pp3c1_sORF1884	Chr01:21460466-21460550	86.8	lncRNA	Pp3c1_30150V3.2 | lncRNAs: lcl|Ppatens_Pp3c1_30150V3.2				no
Pp3c1_sORF1885	Chr01:21462107-21462386	63.2	Intergenic	ID=XLOC_008936|TCONS_00015204				no
Pp3c1_sORF1886	Chr01:21479037-21479187	56.7	lncRNA	Pp3c1_30220V3.2 | lncRNAs: lcl|Ppatens_Pp3c1_30220V3.2				no
Pp3c1_sORF1887	Chr01:21479523-21479595	99.1	lncRNA	Pp3c1_30220V3.2,Pp3c1_30220V3.1 | lncRNAs: lcl|Ppatens_Pp3c1_30220V3.1,lcl|Ppatens_Pp3c1_30220V3.2				no
Pp3c1_sORF1888	Chr01:21479945-21480038	88.7	lncRNA	Pp3c1_30220V3.2,Pp3c1_30220V3.1 | lncRNAs: lcl|Ppatens_Pp3c1_30220V3.1,lcl|Ppatens_Pp3c1_30220V3.2				no
Pp3c1_sORF1889	Chr01:21415212-21415362	99.1	CDS	Pp3c1_30080V3.1,Pp3c1_30080V3.2	Ceratodon,Sphagnum	Ceratodon:2.4578,Sphagnum:1.0248		no
Pp3c1_sORF189	Chr01:11527823-11527859	98.8	CDS	Pp3c1_15390V3.1,Pp3c1_15390V3.2				no
Pp3c1_sORF1890	Chr01:21415401-21415434	100	CDS	Pp3c1_30080V3.1,Pp3c1_30080V3.2				no
Pp3c1_sORF1891	Chr01:21420768-21420885	87.8	CDS	Pp3c1_30090V3.1,Pp3c1_30090V3.2				no
Pp3c1_sORF1892	Chr01:21421131-21421182	94.5	CDS	Pp3c1_30090V3.1,Pp3c1_30090V3.2				no
Pp3c1_sORF1893	Chr01:21422618-21422651	100	five_prime_UTR	Pp3c1_30090V3.1,Pp3c1_30090V3.2				no
Pp3c1_sORF1894	Chr01:21479863-21480070	82.9	lncRNA	Pp3c1_30210V3.1 | lncRNAs: lcl|Ppatens_Pp3c1_30210V3.1				no
Pp3c1_sORF1895	Chr01:21564096-21564285	95.1	five_prime_UTR	Pp3c1_30350V3.3,Pp3c1_30350V3.1			Start codon excision	no
Pp3c1_sORF1896	Chr01:21564426-21564534	92	five_prime_UTR	Pp3c1_30350V3.3,Pp3c1_30350V3.2,Pp3c1_30350V3.1				no
Pp3c1_sORF1897	Chr01:21564656-21564737	87.4	Interlaced	Pp3c1_30350V3.3,Pp3c1_30350V3.2,Pp3c1_30350V3.1				no
Pp3c1_sORF1898	Chr01:21564923-21565136	71.1	CDS	Pp3c1_30350V3.3,Pp3c1_30350V3.2,Pp3c1_30350V3.1				no
Pp3c1_sORF1899	Chr01:21565388-21565613	51.7	CDS	Pp3c1_30350V3.3,Pp3c1_30350V3.2,Pp3c1_30350V3.1				no
Pp3c1_sORF19	Chr01:9908154-9908253	78.6	CDS	Pp3c1_13600V3.1,Pp3c1_13600V3.2,Pp3c1_13600V3.3,Pp3c1_13600V3.4	Ceratodon	Ceratodon:0.4648		no
Pp3c1_sORF190	Chr01:11531023-11531113	98.6	CDS	Pp3c1_15400V3.2,Pp3c1_15400V3.1				no
Pp3c1_sORF1900	Chr01:21567464-21567569	96.5	CDS	Pp3c1_30350V3.3,Pp3c1_30350V3.2,Pp3c1_30350V3.1				no
Pp3c1_sORF1901	Chr01:21567959-21568028	88.2	CDS	Pp3c1_30350V3.3,Pp3c1_30350V3.2,Pp3c1_30350V3.1				no
Pp3c1_sORF1902	Chr01:21568419-21568602	70.1	CDS	Pp3c1_30350V3.3,Pp3c1_30350V3.2,Pp3c1_30350V3.1				no
Pp3c1_sORF1903	Chr01:21605715-21605751	97.6	lncRNA	Pp3c1_30400V3.1,Pp3c1_30400V3.3,Pp3c1_30400V3.2,Pp3c1_30400V3.4,Pp3c1_30400V3.5,Pp3c1_30400V3.6 | lncRNAs: lcl|Ppatens_Pp3c1_30400V3.5,lcl|Ppatens_Pp3c1_30400V3.6				no
Pp3c1_sORF1904	Chr01:21605787-21605841	99.6	lncRNA	Pp3c1_30400V3.1,Pp3c1_30400V3.3,Pp3c1_30400V3.2,Pp3c1_30400V3.4,Pp3c1_30400V3.5,Pp3c1_30400V3.6 | lncRNAs: lcl|Ppatens_Pp3c1_30400V3.5,lcl|Ppatens_Pp3c1_30400V3.6				no
Pp3c1_sORF1905	Chr01:21609067-21609109	92.4	lncRNA	Pp3c1_30410V3.2,Pp3c1_30410V3.1 | lncRNAs: lcl|Ppatens_Pp3c1_30410V3.1,lcl|Ppatens_Pp3c1_30410V3.2				no
Pp3c1_sORF1906	Chr01:21611463-21611574	97.6	lncRNA	Pp3c1_30428V3.1 | lncRNAs: lcl|Ppatens_Pp3c1_30428V3.1				no
Pp3c1_sORF1907	Chr01:21574322-21574499	75.6	CDS	Pp3c1_30360V3.1,Pp3c1_30360V3.2	Ceratodon	Ceratodon:2.6197		no
Pp3c1_sORF1908	Chr01:21574512-21574650	76.6	CDS	Pp3c1_30360V3.1,Pp3c1_30360V3.2				no
Pp3c1_sORF191	Chr01:11534621-11534843	72	five_prime_UTR	Pp3c1_15410V3.2,Pp3c1_15410V3.4			Stop codon excision	no
Pp3c1_sORF1910	Chr01:21583323-21583383	100	CDS	Pp3c1_30380V3.1,Pp3c1_30380V3.2				no
Pp3c1_sORF1911	Chr01:21584726-21584771	96.2	CDS	Pp3c1_30380V3.1,Pp3c1_30380V3.2				no
Pp3c1_sORF1912	Chr01:21584792-21584888	98.3	CDS	Pp3c1_30380V3.1,Pp3c1_30380V3.2				no
Pp3c1_sORF1913	Chr01:21584903-21585011	85.7	CDS	Pp3c1_30380V3.1,Pp3c1_30380V3.2				no
Pp3c1_sORF1914	Chr01:21585104-21585155	92.3	CDS	Pp3c1_30380V3.1,Pp3c1_30380V3.2				no
Pp3c1_sORF1915	Chr01:21585161-21585281	96.2	CDS	Pp3c1_30380V3.1,Pp3c1_30380V3.2				no
Pp3c1_sORF1916	Chr01:21585734-21585836	83.4	five_prime_UTR	Pp3c1_30380V3.1,Pp3c1_30380V3.2				no
Pp3c1_sORF1917	Chr01:21664900-21664963	96.7	CDS	Pp3c1_30500V3.2			Start codon excision	no
Pp3c1_sORF1918	Chr01:21665940-21666048	91.3	CDS	Pp3c1_30500V3.1,Pp3c1_30500V3.2				no
Pp3c1_sORF1919	Chr01:21660651-21660696	100	Intergenic	ID=XLOC_008888|TCONS_00015119				no
Pp3c1_sORF192	Chr01:11535227-11535380	61.5	five_prime_UTR	Pp3c1_15410V3.4			Excision	no
Pp3c1_sORF1920	Chr01:21714151-21714292	74.3	five_prime_UTR	Pp3c1_30550V3.2				no
Pp3c1_sORF1921	Chr01:21790024-21790150	98.9	CDS	Pp3c1_30640V3.3				no
Pp3c1_sORF1922	Chr01:21791839-21791893	98.9	CDS	Pp3c1_30660V3.2				no
Pp3c1_sORF1923	Chr01:21836607-21836904	37.9	five_prime_UTR	Pp3c1_30760V3.3,Pp3c1_30760V3.2				no
Pp3c1_sORF1924	Chr01:21837610-21837733	100	CDS	Pp3c1_30760V3.3,Pp3c1_30760V3.1,Pp3c1_30760V3.2				no
Pp3c1_sORF1925	Chr01:21839287-21839341	88.6	three_prime_UTR	Pp3c1_30760V3.3,Pp3c1_30760V3.1,Pp3c1_30760V3.2				no
Pp3c1_sORF1926	Chr01:21777103-21777199	98	three_prime_UTR	Pp3c1_30630V3.1,Pp3c1_30630V3.4,Pp3c1_30630V3.3,Pp3c1_30630V3.2				no
Pp3c1_sORF1927	Chr01:21779818-21779902	98.7	CDS	Pp3c1_30630V3.1,Pp3c1_30630V3.4,Pp3c1_30630V3.3,Pp3c1_30630V3.2				no
Pp3c1_sORF1928	Chr01:21780016-21780064	92	CDS	Pp3c1_30630V3.1,Pp3c1_30630V3.4,Pp3c1_30630V3.3,Pp3c1_30630V3.2				no
Pp3c1_sORF1929	Chr01:21781155-21781359	100	CDS	Pp3c1_30630V3.1,Pp3c1_30630V3.4,Pp3c1_30630V3.3,Pp3c1_30630V3.2	Ceratodon	Ceratodon:1.6047		no
Pp3c1_sORF193	Chr01:11536768-11536900	97.7	CDS	Pp3c1_15410V3.3,Pp3c1_15410V3.2,Pp3c1_15410V3.4				no
Pp3c1_sORF1930	Chr01:21781452-21781515	85.6	CDS	Pp3c1_30630V3.1,Pp3c1_30630V3.4,Pp3c1_30630V3.3,Pp3c1_30630V3.2				no
Pp3c1_sORF1931	Chr01:21782008-21782122	99.3	CDS	Pp3c1_30630V3.1,Pp3c1_30630V3.4,Pp3c1_30630V3.3,Pp3c1_30630V3.2				no
Pp3c1_sORF1932	Chr01:21782308-21782593	98.5	CDS	Pp3c1_30630V3.1,Pp3c1_30630V3.4,Pp3c1_30630V3.3,Pp3c1_30630V3.2	Ceratodon	Ceratodon:2.8415		no
Pp3c1_sORF1933	Chr01:21782740-21782821	87.2	CDS	Pp3c1_30630V3.1,Pp3c1_30630V3.4,Pp3c1_30630V3.3,Pp3c1_30630V3.2				no
Pp3c1_sORF1934	Chr01:21848744-21848996	42822	five_prime_UTR	Pp3c1_30790V3.3			Stop codon excision	no
Pp3c1_sORF1935	Chr01:21784467-21784512	96.7	three_prime_UTR	Pp3c1_30640V3.2,Pp3c1_30640V3.3				no
Pp3c1_sORF1936	Chr01:21849611-21849695	93.8	Interlaced	Pp3c1_30790V3.2,Pp3c1_30790V3.1,Pp3c1_30790V3.3,Pp3c1_30790V3.5			Excision	no
Pp3c1_sORF1937	Chr01:21850093-21850126	96.1	CDS	Pp3c1_30790V3.1,Pp3c1_30790V3.5,Pp3c1_30790V3.4,Pp3c1_30790V3.3,Pp3c1_30790V3.2				no
Pp3c1_sORF1938	Chr01:21785998-21786067	95.8	CDS	Pp3c1_30640V3.2,Pp3c1_30640V3.3,Pp3c1_30640V3.1				no
Pp3c1_sORF1939	Chr01:21787185-21787434	60.4	CDS	Pp3c1_30640V3.2,Pp3c1_30640V3.3,Pp3c1_30640V3.1	Ceratodon	Ceratodon:1.8542		no
Pp3c1_sORF194	Chr01:11537449-11537572	97.3	CDS	Pp3c1_15410V3.3,Pp3c1_15410V3.2,Pp3c1_15410V3.4				no
Pp3c1_sORF1940	Chr01:21787641-21787686	90.1	CDS	Pp3c1_30640V3.2,Pp3c1_30640V3.3,Pp3c1_30640V3.1				no
Pp3c1_sORF1941	Chr01:21788412-21788451	98.8	five_prime_UTR	Pp3c1_30640V3.2,Pp3c1_30640V3.3,Pp3c1_30640V3.1				no
Pp3c1_sORF1942	Chr01:21830122-21830197	99.1	CDS	Pp3c1_30730V3.2,Pp3c1_30730V3.1				no
Pp3c1_sORF1943	Chr01:21830227-21830335	98.1	CDS	Pp3c1_30730V3.2,Pp3c1_30730V3.1				no
Pp3c1_sORF1944	Chr01:21906137-21906287	54.9	five_prime_UTR	Pp3c1_30970V3.6			Excision,Start codon excision,Stop codon excision	no
Pp3c1_sORF1945	Chr01:21841317-21841380	99.2	CDS	Pp3c1_30770V3.1				no
Pp3c1_sORF1946	Chr01:21841754-21841793	94	CDS	Pp3c1_30770V3.1				no
Pp3c1_sORF1947	Chr01:21842137-21842170	94	CDS	Pp3c1_30770V3.1				no
Pp3c1_sORF1948	Chr01:21908127-21908253	75.7	CDS	Pp3c1_30970V3.4,Pp3c1_30970V3.5,Pp3c1_30970V3.1,Pp3c1_30970V3.6,Pp3c1_30970V3.3,Pp3c1_30970V3.2				no
Pp3c1_sORF1949	Chr01:21908307-21908400	90.4	CDS	Pp3c1_30970V3.4,Pp3c1_30970V3.5,Pp3c1_30970V3.1,Pp3c1_30970V3.6,Pp3c1_30970V3.3,Pp3c1_30970V3.2				no
Pp3c1_sORF195	Chr01:11537620-11537722	85.1	CDS	Pp3c1_15410V3.3,Pp3c1_15410V3.2,Pp3c1_15410V3.4				no
Pp3c1_sORF1950	Chr01:21843447-21843591	99.4	lncRNA	Pp3c1_30780V3.1 | lncRNAs: lcl|Ppatens_Pp3c1_30780V3.1				no
Pp3c1_sORF1951	Chr01:21908781-21908997	98.5	CDS	Pp3c1_30970V3.4,Pp3c1_30970V3.5,Pp3c1_30970V3.1,Pp3c1_30970V3.6,Pp3c1_30970V3.3,Pp3c1_30970V3.2	Ceratodon	Ceratodon:1.603		no
Pp3c1_sORF1952	Chr01:21909261-21909339	100	CDS	Pp3c1_30970V3.4,Pp3c1_30970V3.5,Pp3c1_30970V3.1,Pp3c1_30970V3.6,Pp3c1_30970V3.3,Pp3c1_30970V3.2	Ceratodon	Ceratodon:0.3716		no
Pp3c1_sORF1953	Chr01:21909895-21910033	90.8	CDS	Pp3c1_30970V3.4,Pp3c1_30970V3.5,Pp3c1_30970V3.1,Pp3c1_30970V3.6,Pp3c1_30970V3.3,Pp3c1_30970V3.2				no
Pp3c1_sORF1954	Chr01:21910117-21910168	97.6	CDS	Pp3c1_30970V3.4,Pp3c1_30970V3.5,Pp3c1_30970V3.1,Pp3c1_30970V3.6,Pp3c1_30970V3.3,Pp3c1_30970V3.2				no
Pp3c1_sORF1955	Chr01:21911006-21911060	92	CDS	Pp3c1_30970V3.4,Pp3c1_30970V3.5,Pp3c1_30970V3.1,Pp3c1_30970V3.6,Pp3c1_30970V3.3,Pp3c1_30970V3.2				no
Pp3c1_sORF1956	Chr01:21911081-21911171	95.4	CDS	Pp3c1_30970V3.4,Pp3c1_30970V3.5,Pp3c1_30970V3.1,Pp3c1_30970V3.6,Pp3c1_30970V3.3,Pp3c1_30970V3.2				no
Pp3c1_sORF1957	Chr01:21913341-21913404	98.4	CDS	Pp3c1_30990V3.1,Pp3c1_30990V3.2				no
Pp3c1_sORF1958	Chr01:21914669-21914900	97	CDS	Pp3c1_30990V3.1,Pp3c1_30990V3.2	Ceratodon	Ceratodon:1.2128		no
Pp3c1_sORF1959	Chr01:21915243-21915501	56.7	Interlaced	Pp3c1_30990V3.1,Pp3c1_30990V3.2				no
Pp3c1_sORF196	Chr01:11537839-11537962	93.4	CDS	Pp3c1_15410V3.3,Pp3c1_15410V3.2,Pp3c1_15410V3.4				no
Pp3c1_sORF1960	Chr01:21915808-21916015	41.5	three_prime_UTR	Pp3c1_30990V3.1,Pp3c1_30990V3.2				no
Pp3c1_sORF1961	Chr01:21935565-21935670	87.3	CDS	Pp3c1_31020V3.2,Pp3c1_31020V3.1,Pp3c1_31020V3.4,Pp3c1_31020V3.3				no
Pp3c1_sORF1962	Chr01:21936040-21936154	94.9	CDS	Pp3c1_31020V3.2,Pp3c1_31020V3.1,Pp3c1_31020V3.4,Pp3c1_31020V3.3				no
Pp3c1_sORF1963	Chr01:21871724-21871829	92.7	lncRNA	Pp3c1_30790V3.3 | lncRNAs: TCONS_00017059_100,lcl|Ppatens_Pp3c1_30870V3.1,lcl|Ppatens_Pp3c1_30870V3.2				no
Pp3c1_sORF1964	Chr01:1853365-1853398	99.1	CDS	Pp3c1_2520V3.1,Pp3c1_2520V3.2,Pp3c1_2520V3.3				no
Pp3c1_sORF1965	Chr01:21960227-21960350	98.3	lncRNA	Pp3c1_31068V3.1 | lncRNAs: lcl|Ppatens_Pp3c1_31068V3.1				no
Pp3c1_sORF1966	Chr01:21961043-21961316	42842	lncRNA	Pp3c1_31068V3.1 | lncRNAs: lcl|Ppatens_Pp3c1_31068V3.1				no
Pp3c1_sORF1967	Chr01:21962800-21962995	94	lncRNA	Pp3c1_31097V3.1 | lncRNAs: lcl|Ppatens_Pp3c1_31097V3.1				no
Pp3c1_sORF1968	Chr01:21898317-21898419	82.4	three_prime_UTR	Pp3c1_30960V3.4				no
Pp3c1_sORF1969	Chr01:21899696-21899735	95	three_prime_UTR,CDS	Pp3c1_30960V3.1,Pp3c1_30960V3.4,Pp3c1_30960V3.3,Pp3c1_30960V3.2				no
Pp3c1_sORF197	Chr01:11538115-11538256	99.6	CDS	Pp3c1_15410V3.3,Pp3c1_15410V3.2,Pp3c1_15410V3.4				no
Pp3c1_sORF1970	Chr01:21901805-21902078	95.5	CDS	Pp3c1_30960V3.1,Pp3c1_30960V3.4,Pp3c1_30960V3.3,Pp3c1_30960V3.2	Ceratodon,Sphagnum	Ceratodon:1.6687,Sphagnum:1.0757		no
Pp3c1_sORF1971	Chr01:21967311-21967593	42756	Interlaced	Pp3c1_31111V3.1				no
Pp3c1_sORF1972	Chr01:21945854-21945965	94.7	CDS	Pp3c1_31050V3.2,Pp3c1_31050V3.4,Pp3c1_31050V3.3,Pp3c1_31050V3.1	Ceratodon	Ceratodon:1.2417		no
Pp3c1_sORF1973	Chr01:22012170-22012341	89.2	lncRNA	Pp3c1_31160V3.3 | lncRNAs: CNT0033731	Sphagnum	Sphagnum:1.7184		no
Pp3c1_sORF1974	Chr01:22013003-22013072	99.6	lncRNA	Pp3c1_31160V3.3 | lncRNAs: CNT0033731				no
Pp3c1_sORF1975	Chr01:21948664-21948724	99.9	CDS	Pp3c1_31050V3.2,Pp3c1_31050V3.4,Pp3c1_31050V3.3,Pp3c1_31050V3.1				no
Pp3c1_sORF1976	Chr01:21949585-21949774	87.3	CDS	Pp3c1_31050V3.2,Pp3c1_31050V3.4,Pp3c1_31050V3.3,Pp3c1_31050V3.1				no
Pp3c1_sORF1977	Chr01:21950272-21950458	97	CDS	Pp3c1_31050V3.2,Pp3c1_31050V3.4,Pp3c1_31050V3.3,Pp3c1_31050V3.1				no
Pp3c1_sORF1978	Chr01:21950461-21950746	99.6	CDS	Pp3c1_31050V3.2,Pp3c1_31050V3.4,Pp3c1_31050V3.3,Pp3c1_31050V3.1				no
Pp3c1_sORF1979	Chr01:21950773-21951067	70.8	CDS	Pp3c1_31050V3.2,Pp3c1_31050V3.4,Pp3c1_31050V3.3,Pp3c1_31050V3.1				no
Pp3c1_sORF198	Chr01:11538307-11538394	88.4	Interlaced	Pp3c1_15410V3.3,Pp3c1_15410V3.2,Pp3c1_15410V3.4				no
Pp3c1_sORF1980	Chr01:21952631-21952685	99.6	Interlaced	Pp3c1_31050V3.2,Pp3c1_31050V3.4,Pp3c1_31050V3.3,Pp3c1_31050V3.1				no
Pp3c1_sORF1981	Chr01:22017772-22017814	99.9	lncRNA	Pp3c1_31160V3.3,Pp3c1_31160V3.1,Pp3c1_31160V3.2 | lncRNAs: CNT0033731				no
Pp3c1_sORF1982	Chr01:22018159-22018240	85.5	lncRNA	Pp3c1_31160V3.3,Pp3c1_31160V3.1,Pp3c1_31160V3.2 | lncRNAs: CNT0033731				no
Pp3c1_sORF1983	Chr01:22018264-22018417	95.2	lncRNA	Pp3c1_31160V3.3,Pp3c1_31160V3.1,Pp3c1_31160V3.2 | lncRNAs: CNT0033731				no
Pp3c1_sORF1984	Chr01:22019041-22019182	96.2	lncRNA	Pp3c1_31160V3.3,Pp3c1_31160V3.1,Pp3c1_31160V3.2 | lncRNAs: CNT0033731				no
Pp3c1_sORF1985	Chr01:22019410-22019569	99.9	lncRNA	Pp3c1_31160V3.3,Pp3c1_31160V3.1,Pp3c1_31160V3.2 | lncRNAs: CNT0033731				no
Pp3c1_sORF1986	Chr01:22026417-22026477	89.8	CDS	Pp3c1_31190V3.1,Pp3c1_31190V3.2				no
Pp3c1_sORF1987	Chr01:22027608-22027650	90.3	three_prime_UTR	Pp3c1_31190V3.1,Pp3c1_31190V3.2				no
Pp3c1_sORF1988	Chr01:22027934-22028084	64.5	three_prime_UTR	Pp3c1_31190V3.1,Pp3c1_31190V3.2				no
Pp3c1_sORF1989	Chr01:22028975-22029053	85.8	five_prime_UTR	Pp3c1_31210V3.2,Pp3c1_31210V3.1				no
Pp3c1_sORF199	Chr01:11538411-11538504	85.2	three_prime_UTR	Pp3c1_15410V3.3,Pp3c1_15410V3.2,Pp3c1_15410V3.4				no
Pp3c1_sORF1990	Chr01:22029849-22029948	97.2	CDS	Pp3c1_31210V3.2,Pp3c1_31210V3.1				no
Pp3c1_sORF1991	Chr01:22029951-22030020	99.7	CDS	Pp3c1_31210V3.2,Pp3c1_31210V3.1				no
Pp3c1_sORF1992	Chr01:22032326-22032524	98.3	CDS	Pp3c1_31220V3.1	Ceratodon,Selaginella,Sphagnum	Ceratodon:2.4125,Sphagnum:2.0944,Selaginella:3.6944		no
Pp3c1_sORF1993	Chr01:1865632-1865701	91.6	CDS	Pp3c1_2520V3.3,Pp3c1_2540V3.11				no
Pp3c1_sORF1994	Chr01:1865785-1865848	95.7	CDS	Pp3c1_2540V3.9,Pp3c1_2540V3.11				no
Pp3c1_sORF1995	Chr01:1865941-1866034	95.4	CDS	Pp3c1_2540V3.9,Pp3c1_2540V3.11				no
Pp3c1_sORF1996	Chr01:1866506-1866719	100	CDS	Pp3c1_2540V3.9,Pp3c1_2540V3.10,Pp3c1_2540V3.11	Ceratodon	Ceratodon:1.6913		no
Pp3c1_sORF1997	Chr01:1867061-1867115	98.8	five_prime_UTR,CDS	Pp3c1_2540V3.9,Pp3c1_2540V3.10,Pp3c1_2540V3.11				no
Pp3c1_sORF1998	Chr01:1868336-1868396	100	five_prime_UTR	Pp3c1_2540V3.10			Excision	no
Pp3c1_sORF1999	Chr01:22032882-22033020	60.7	three_prime_UTR	Pp3c1_31220V3.1				no
Pp3c1_sORF2	Chr01:9793211-9793247	99	Intergenic	ID=XLOC_034410|TCONS_00058842				no
Pp3c1_sORF20	Chr01:9908641-9908731	97.8	CDS	Pp3c1_13600V3.1,Pp3c1_13600V3.2,Pp3c1_13600V3.3,Pp3c1_13600V3.4				no
Pp3c1_sORF200	Chr01:11356145-11356313	62	three_prime_UTR	Pp3c1_15160V3.4				no
Pp3c1_sORF2000	Chr01:22032967-22033135	64.6	three_prime_UTR	Pp3c1_31230V3.7				no
Pp3c1_sORF2001	Chr01:22033138-22033183	94.1	three_prime_UTR	Pp3c1_31230V3.7				no
Pp3c1_sORF2002	Chr01:22035227-22035290	89.4	CDS	Pp3c1_31230V3.5				no
Pp3c1_sORF2003	Chr01:22036148-22036310	98.1	five_prime_UTR	Pp3c1_31230V3.5			Stop codon excision	no
Pp3c1_sORF2004	Chr01:22036602-22036734	91.3	five_prime_UTR	Pp3c1_31230V3.5,Pp3c1_31230V3.3,Pp3c1_31230V3.4			Excision	no
Pp3c1_sORF2005	Chr01:22037307-22037430	97.6	five_prime_UTR	Pp3c1_31230V3.5,Pp3c1_31230V3.3,Pp3c1_31230V3.4			Stop codon excision	no
Pp3c1_sORF2006	Chr01:22039196-22039232	99.5	CDS	Pp3c1_31250V3.1,Pp3c1_31250V3.2				no
Pp3c1_sORF2007	Chr01:22040300-22040366	99.9	CDS	Pp3c1_31250V3.1,Pp3c1_31250V3.2				no
Pp3c1_sORF2008	Chr01:1869410-1869506	81.2	five_prime_UTR	Pp3c1_2540V3.9,Pp3c1_2540V3.10			Stop codon excision	no
Pp3c1_sORF2009	Chr01:1869489-1869546	89.2	five_prime_UTR	Pp3c1_2540V3.9,Pp3c1_2540V3.10				no
Pp3c1_sORF201	Chr01:11359559-11359709	95.8	CDS	Pp3c1_15160V3.4,Pp3c1_15160V3.1,Pp3c1_15160V3.3,Pp3c1_15160V3.2				no
Pp3c1_sORF2010	Chr01:1869564-1869621	95.2	five_prime_UTR	Pp3c1_2540V3.9				no
Pp3c1_sORF2011	Chr01:22043275-22043488	49.1	five_prime_UTR	Pp3c1_31250V3.2				no
Pp3c1_sORF2012	Chr01:22043376-22043574	98.2	five_prime_UTR	Pp3c1_31250V3.2				no
Pp3c1_sORF2013	Chr01:22073379-22073487	79.7	three_prime_UTR	Pp3c1_31280V3.3,Pp3c1_31280V3.9,Pp3c1_31280V3.7,Pp3c1_31280V3.8,Pp3c1_31280V3.6,Pp3c1_31280V3.2,Pp3c1_31280V3.1,Pp3c1_31280V3.12,Pp3c1_31280V3.5,Pp3c1_31280V3.4				no
Pp3c1_sORF2014	Chr01:22073953-22074001	90.7	three_prime_UTR	Pp3c1_31280V3.3,Pp3c1_31280V3.9,Pp3c1_31280V3.7,Pp3c1_31280V3.8,Pp3c1_31280V3.6,Pp3c1_31280V3.2,Pp3c1_31280V3.1,Pp3c1_31280V3.12,Pp3c1_31280V3.5,Pp3c1_31280V3.4				no
Pp3c1_sORF2015	Chr01:22074232-22074274	97.1	three_prime_UTR	Pp3c1_31280V3.11,Pp3c1_31280V3.10			Excision	no
Pp3c1_sORF2016	Chr01:22074445-22074577	74.2	three_prime_UTR	Pp3c1_31280V3.12			Start codon excision	no
Pp3c1_sORF2017	Chr01:22075462-22075624	90.7	CDS	Pp3c1_31280V3.10,Pp3c1_31280V3.3,Pp3c1_31280V3.11,Pp3c1_31280V3.9,Pp3c1_31280V3.7,Pp3c1_31280V3.8,Pp3c1_31280V3.6,Pp3c1_31280V3.2,Pp3c1_31280V3.1,Pp3c1_31280V3.12,Pp3c1_31280V3.5,Pp3c1_31280V3.4				no
Pp3c1_sORF2018	Chr01:22162857-22162905	100	CDS	Pp3c1_31360V3.4,Pp3c1_31360V3.3,Pp3c1_31360V3.5,Pp3c1_31360V3.1,Pp3c1_31360V3.2,Pp3c1_31360V3.6				no
Pp3c1_sORF2019	Chr01:22164432-22164489	99.5	three_prime_UTR	Pp3c1_31360V3.4,Pp3c1_31360V3.3,Pp3c1_31360V3.5,Pp3c1_31360V3.1,Pp3c1_31360V3.2,Pp3c1_31360V3.6				no
Pp3c1_sORF202	Chr01:11543137-11543269	90.3	CDS	Pp3c1_15430V3.1,Pp3c1_15430V3.2				no
Pp3c1_sORF2020	Chr01:22235192-22235405	99.5	CDS	Pp3c1_31470V3.2				no
Pp3c1_sORF2021	Chr01:22235555-22235627	95.9	CDS	Pp3c1_31470V3.2				no
Pp3c1_sORF2022	Chr01:22235732-22235831	94.7	CDS	Pp3c1_31470V3.2				no
Pp3c1_sORF2023	Chr01:22236269-22236347	82.5	CDS	Pp3c1_31470V3.2				no
Pp3c1_sORF2024	Chr01:22178879-22178912	99.2	five_prime_UTR	Pp3c1_31370V3.2,Pp3c1_31370V3.1,Pp3c1_31370V3.3				no
Pp3c1_sORF2025	Chr01:22178941-22179022	99.4	five_prime_UTR	Pp3c1_31370V3.2,Pp3c1_31370V3.1,Pp3c1_31370V3.3				no
Pp3c1_sORF2026	Chr01:22180751-22181012	55.8	five_prime_UTR	Pp3c1_31370V3.2				no
Pp3c1_sORF2027	Chr01:22185915-22186011	76.4	lncRNA	Pp3c1_31401V3.1 | lncRNAs: lcl|Ppatens_Pp3c1_31401V3.1				no
Pp3c1_sORF2028	Chr01:22186078-22186141	98.7	lncRNA	Pp3c1_31401V3.1 | lncRNAs: lcl|Ppatens_Pp3c1_31401V3.1				no
Pp3c1_sORF2029	Chr01:22257758-22257803	99.9	five_prime_UTR	Pp3c1_31520V3.2,Pp3c1_31520V3.1				no
Pp3c1_sORF203	Chr01:11562180-11562234	95.5	five_prime_UTR	Pp3c1_15460V3.5				no
Pp3c1_sORF2030	Chr01:22257795-22257882	97.2	Interlaced	Pp3c1_31520V3.2,Pp3c1_31520V3.1				no
Pp3c1_sORF2031	Chr01:22227569-22227791	92.7	five_prime_UTR	Pp3c1_31440V3.2,Pp3c1_31440V3.1				no
Pp3c1_sORF2032	Chr01:22268591-22268783	93.5	three_prime_UTR	Pp3c1_31540V3.2,Pp3c1_31540V3.1				no
Pp3c1_sORF2033	Chr01:22269442-22269721	99	CDS	Pp3c1_31540V3.2,Pp3c1_31540V3.1	Ceratodon	Ceratodon:9.1235		no
Pp3c1_sORF2034	Chr01:22270055-22270166	98.9	CDS	Pp3c1_31540V3.2,Pp3c1_31540V3.1				no
Pp3c1_sORF2035	Chr01:22270190-22270358	54.4	CDS	Pp3c1_31540V3.2,Pp3c1_31540V3.1	Ceratodon	Ceratodon:1.9898		no
Pp3c1_sORF2036	Chr01:223532-223652	78.7	five_prime_UTR	Pp3c1_424V3.1			Excision	no
Pp3c1_sORF2037	Chr01:22292659-22292830	64.1	lncRNA	Pp3c1_31600V3.1,Pp3c1_31600V3.2 | lncRNAs: lcl|Ppatens_Pp3c1_31600V3.1,lcl|Ppatens_Pp3c1_31600V3.2				no
Pp3c1_sORF2038	Chr01:22295753-22295939	46.9	three_prime_UTR	Pp3c1_31600V3.2			Start codon excision	no
Pp3c1_sORF2039	Chr01:22298196-22298268	99.4	CDS	Pp3c1_31610V3.2,Pp3c1_31610V3.1,Pp3c1_31610V3.7,Pp3c1_31610V3.4,Pp3c1_31610V3.6,Pp3c1_31610V3.8,Pp3c1_31610V3.3,Pp3c1_31610V3.5				no
Pp3c1_sORF204	Chr01:11570989-11571037	90.9	lncRNA	Pp3c1_15510V3.1 | lncRNAs: lcl|Ppatens_Pp3c1_15510V3.1				no
Pp3c1_sORF2040	Chr01:22298592-22298667	90.9	CDS	Pp3c1_31610V3.2,Pp3c1_31610V3.1,Pp3c1_31610V3.7,Pp3c1_31610V3.4,Pp3c1_31610V3.6,Pp3c1_31610V3.8,Pp3c1_31610V3.3,Pp3c1_31610V3.5				no
Pp3c1_sORF2041	Chr01:22298700-22298994	96.7	CDS	Pp3c1_31610V3.2,Pp3c1_31610V3.1,Pp3c1_31610V3.7,Pp3c1_31610V3.4,Pp3c1_31610V3.6,Pp3c1_31610V3.8,Pp3c1_31610V3.3,Pp3c1_31610V3.5	Ceratodon,Sphagnum	Ceratodon:2.7199,Sphagnum:1.2836		no
Pp3c1_sORF2042	Chr01:22299813-22299855	90.4	five_prime_UTR,CDS	Pp3c1_31610V3.2			Excision	no
Pp3c1_sORF2043	Chr01:22301083-22301251	59.9	five_prime_UTR	Pp3c1_31610V3.2				no
Pp3c1_sORF2044	Chr01:22303941-22304022	90.5	CDS	Pp3c1_31630V3.1,Pp3c1_31630V3.2				no
Pp3c1_sORF2045	Chr01:22305042-22305084	99.2	CDS	Pp3c1_31630V3.1,Pp3c1_31630V3.2				no
Pp3c1_sORF2046	Chr01:22306165-22306369	78.3	five_prime_UTR	Pp3c1_31630V3.1,Pp3c1_31630V3.2				no
Pp3c1_sORF2047	Chr01:22306465-22306663	51.7	five_prime_UTR	Pp3c1_31630V3.1,Pp3c1_31630V3.2				no
Pp3c1_sORF2048	Chr01:22306678-22306819	71.1	five_prime_UTR	Pp3c1_31630V3.1,Pp3c1_31630V3.2				no
Pp3c1_sORF2049	Chr01:22397173-22397353	57	lncRNA	Pp3c1_31720V3.2 | lncRNAs: lcl|Ppatens_Pp3c1_31720V3.2				no
Pp3c1_sORF205	Chr01:11574557-11574626	88.4	five_prime_UTR	Pp3c1_15530V3.9,Pp3c1_15510V3.1,Pp3c1_15530V3.10				no
Pp3c1_sORF2050	Chr01:22398968-22399067	83.1	Intergenic	ID=XLOC_015711|TCONS_00026699,ID=XLOC_015711|TCONS_00026700,ID=XLOC_015711|TCONS_00026701				no
Pp3c1_sORF2051	Chr01:224155-224197	96.6	five_prime_UTR	Pp3c1_430V3.1			Excision	no
Pp3c1_sORF2052	Chr01:22364915-22364948	99.5	CDS	Pp3c1_31680V3.5				no
Pp3c1_sORF2053	Chr01:22366899-22367007	95.5	CDS	Pp3c1_31680V3.5				no
Pp3c1_sORF2054	Chr01:22368667-22368706	96.1	CDS	Pp3c1_31680V3.5				no
Pp3c1_sORF2055	Chr01:22369339-22369504	100	five_prime_UTR,CDS	Pp3c1_31680V3.5				no
Pp3c1_sORF2056	Chr01:22369702-22369888	44.7	five_prime_UTR	Pp3c1_31680V3.5				no
Pp3c1_sORF2057	Chr01:22396067-22396115	99.3	Intergenic	ID=XLOC_015741|TCONS_00026760				no
Pp3c1_sORF2058	Chr01:22397463-22397514	97.5	Intergenic	ID=XLOC_015741|TCONS_00026760				no
Pp3c1_sORF2059	Chr01:22398102-22398243	67.4	Intergenic	ID=XLOC_015741|TCONS_00026760				no
Pp3c1_sORF206	Chr01:11394842-11394971	100	CDS	Pp3c1_15210V3.5,Pp3c1_15210V3.1,Pp3c1_15210V3.2,Pp3c1_15210V3.4,Pp3c1_15210V3.3				no
Pp3c1_sORF2060	Chr01:22399016-22399097	94.6	Intergenic	ID=XLOC_015741|TCONS_00026760				no
Pp3c1_sORF2061	Chr01:22399109-22399274	79.3	Intergenic	ID=XLOC_015741|TCONS_00026760				no
Pp3c1_sORF2062	Chr01:22466778-22466967	79.3	CDS	Pp3c1_31830V3.1,Pp3c1_31830V3.2				no
Pp3c1_sORF2063	Chr01:22467300-22467492	91.2	Interlaced	Pp3c1_31830V3.1,Pp3c1_31830V3.2				no
Pp3c1_sORF2064	Chr01:22409427-22409508	89.2	three_prime_UTR	Pp3c1_31760V3.2,Pp3c1_31760V3.3,Pp3c1_31760V3.1				no
Pp3c1_sORF2065	Chr01:22511467-22511530	93.1	five_prime_UTR	Pp3c1_31900V3.1,Pp3c1_31850V3.2				no
Pp3c1_sORF2066	Chr01:22512532-22512649	76.2	five_prime_UTR	Pp3c1_31900V3.1				no
Pp3c1_sORF2067	Chr01:22512707-22512752	90.6	five_prime_UTR	Pp3c1_31900V3.1				no
Pp3c1_sORF2068	Chr01:22512762-22512852	97.9	Interlaced	Pp3c1_31900V3.1				no
Pp3c1_sORF2069	Chr01:22513954-22514029	93.7	CDS	Pp3c1_31900V3.3				no
Pp3c1_sORF207	Chr01:11580437-11580476	97.7	CDS	Pp3c1_15530V3.9,Pp3c1_15530V3.10,Pp3c1_15530V3.6				no
Pp3c1_sORF2070	Chr01:22514452-22514536	94.7	CDS	Pp3c1_31900V3.3	Ceratodon	Ceratodon:1.7096		no
Pp3c1_sORF2071	Chr01:22516458-22516521	89	three_prime_UTR	Pp3c1_31900V3.3			Stop codon excision	no
Pp3c1_sORF2072	Chr01:22468900-22469119	32.7	Interlaced	Pp3c1_31850V3.2				no
Pp3c1_sORF2073	Chr01:22469000-22469237	71.2	Interlaced	Pp3c1_31850V3.2				no
Pp3c1_sORF2074	Chr01:22560890-22561013	96.8	CDS	Pp3c1_31930V3.2				no
Pp3c1_sORF2075	Chr01:1914893-1915037	96.1	CDS	Pp3c1_2590V3.1				no
Pp3c1_sORF2076	Chr01:22561337-22561463	77	CDS	Pp3c1_31930V3.2	Morchantia	Morchantia:99		no
Pp3c1_sORF2077	Chr01:22563525-22563747	90.7	three_prime_UTR	Pp3c1_31940V3.5				no
Pp3c1_sORF2078	Chr01:22563923-22563965	92	three_prime_UTR	Pp3c1_31940V3.5				no
Pp3c1_sORF2079	Chr01:22564022-22564064	97.9	three_prime_UTR	Pp3c1_31930V3.1				no
Pp3c1_sORF208	Chr01:11432507-11432588	84.8	lncRNA	Pp3c1_15279V3.1 | lncRNAs: TCONS_00027786_100,TCONS_00027787_100,lcl|Ppatens_Pp3c1_15279V3.1,CNT0033437				no
Pp3c1_sORF2080	Chr01:22564108-22564396	93.2	three_prime_UTR	Pp3c1_31940V3.5	Ceratodon	Ceratodon:0.5685		no
Pp3c1_sORF2081	Chr01:22578417-22578555	59.2	three_prime_UTR	Pp3c1_31970V3.1				no
Pp3c1_sORF2082	Chr01:22578554-22578602	89.5	three_prime_UTR	Pp3c1_31970V3.2				no
Pp3c1_sORF2083	Chr01:22579943-22579994	99.2	CDS	Pp3c1_31980V3.4,Pp3c1_31980V3.1,Pp3c1_31980V3.2,Pp3c1_31980V3.3				no
Pp3c1_sORF2084	Chr01:22582426-22582540	86.6	three_prime_UTR	Pp3c1_31980V3.4,Pp3c1_31980V3.1,Pp3c1_31980V3.2,Pp3c1_31980V3.3				no
Pp3c1_sORF2085	Chr01:22518931-22519045	96.2	CDS	Pp3c1_31910V3.1,Pp3c1_31910V3.4,Pp3c1_31910V3.3,Pp3c1_31910V3.2				no
Pp3c1_sORF2086	Chr01:22519445-22519478	97.3	CDS	Pp3c1_31910V3.1,Pp3c1_31910V3.4,Pp3c1_31910V3.3,Pp3c1_31910V3.2				no
Pp3c1_sORF2087	Chr01:22519768-22519828	93.4	CDS	Pp3c1_31910V3.1,Pp3c1_31910V3.4,Pp3c1_31910V3.3,Pp3c1_31910V3.2				no
Pp3c1_sORF2088	Chr01:22520530-22520590	95.6	five_prime_UTR	Pp3c1_31910V3.4,Pp3c1_31910V3.3,Pp3c1_31910V3.2				no
Pp3c1_sORF2089	Chr01:22595794-22595971	96.1	five_prime_UTR	Pp3c1_32030V3.5,Pp3c1_32030V3.2,Pp3c1_32030V3.11,Pp3c1_32030V3.1,Pp3c1_32030V3.3,Pp3c1_32030V3.6,Pp3c1_32030V3.4				no
Pp3c1_sORF209	Chr01:11432891-11432960	91.7	lncRNA	Pp3c1_15279V3.1 | lncRNAs: lcl|Ppatens_Pp3c1_15279V3.1				no
Pp3c1_sORF2090	Chr01:226178-226211	97.3	CDS	Pp3c1_430V3.5,Pp3c1_430V3.1,Pp3c1_430V3.3,Pp3c1_430V3.2,Pp3c1_430V3.4				no
Pp3c1_sORF2091	Chr01:22618016-22618289	96.6	Interlaced	Pp3c1_32060V3.1,Pp3c1_32060V3.2				no
Pp3c1_sORF2092	Chr01:22618802-22618997	70.4	CDS	Pp3c1_32060V3.1,Pp3c1_32060V3.2	Ceratodon	Ceratodon:0.8341		no
Pp3c1_sORF2093	Chr01:22619204-22619237	100	CDS	Pp3c1_32060V3.1,Pp3c1_32060V3.2				no
Pp3c1_sORF2094	Chr01:22619489-22619531	97.9	CDS	Pp3c1_32060V3.1,Pp3c1_32060V3.2				no
Pp3c1_sORF2095	Chr01:22619891-22620020	95.9	CDS	Pp3c1_32060V3.1,Pp3c1_32060V3.2				no
Pp3c1_sORF2096	Chr01:22562405-22562459	100	three_prime_UTR	Pp3c1_31940V3.5				no
Pp3c1_sORF2097	Chr01:22562707-22562776	95.2	three_prime_UTR	Pp3c1_31940V3.5				no
Pp3c1_sORF2098	Chr01:22563468-22563582	79.6	three_prime_UTR	Pp3c1_31940V3.4,Pp3c1_31940V3.2,Pp3c1_31940V3.5,Pp3c1_31940V3.3,Pp3c1_31940V3.1				no
Pp3c1_sORF2099	Chr01:22563920-22564043	98.6	CDS	Pp3c1_31940V3.4,Pp3c1_31940V3.2,Pp3c1_31940V3.5,Pp3c1_31940V3.3,Pp3c1_31940V3.1				no
Pp3c1_sORF21	Chr01:9908968-9909037	93	five_prime_UTR	Pp3c1_13600V3.1,Pp3c1_13600V3.2,Pp3c1_13600V3.3,Pp3c1_13600V3.4				no
Pp3c1_sORF210	Chr01:11616240-11616480	97.1	five_prime_UTR	Pp3c1_15560V3.2,Pp3c1_15560V3.1				no
Pp3c1_sORF2100	Chr01:22564106-22564157	98.9	CDS	Pp3c1_31940V3.4,Pp3c1_31940V3.2,Pp3c1_31940V3.5,Pp3c1_31940V3.3,Pp3c1_31940V3.1				no
Pp3c1_sORF2101	Chr01:22564415-22564520	96.4	CDS	Pp3c1_31940V3.4,Pp3c1_31940V3.2,Pp3c1_31940V3.5,Pp3c1_31940V3.3,Pp3c1_31940V3.1				no
Pp3c1_sORF2102	Chr01:22565740-22565779	99.3	five_prime_UTR	Pp3c1_31940V3.4,Pp3c1_31940V3.2,Pp3c1_31940V3.5,Pp3c1_31940V3.3,Pp3c1_31940V3.1				no
Pp3c1_sORF2103	Chr01:22565809-22565860	99.2	five_prime_UTR	Pp3c1_31940V3.4,Pp3c1_31940V3.2,Pp3c1_31940V3.5,Pp3c1_31940V3.3,Pp3c1_31940V3.1				no
Pp3c1_sORF2104	Chr01:22566328-22566373	100	five_prime_UTR	Pp3c1_31940V3.3,Pp3c1_31940V3.4,Pp3c1_31940V3.2,Pp3c1_31940V3.1				no
Pp3c1_sORF2105	Chr01:22571641-22571695	97.5	CDS	Pp3c1_31960V3.2,Pp3c1_31960V3.1,Pp3c1_31960V3.4,Pp3c1_31960V3.3				no
Pp3c1_sORF2106	Chr01:22571770-22571806	97.5	CDS	Pp3c1_31960V3.2,Pp3c1_31960V3.1,Pp3c1_31960V3.4,Pp3c1_31960V3.3				no
Pp3c1_sORF2107	Chr01:22586072-22586237	99.5	three_prime_UTR	Pp3c1_32020V3.2,Pp3c1_32020V3.1				no
Pp3c1_sORF2108	Chr01:22586338-22586431	83.9	three_prime_UTR	Pp3c1_32020V3.2,Pp3c1_32020V3.1				no
Pp3c1_sORF2109	Chr01:22586442-22586571	74.5	Interlaced	Pp3c1_32020V3.2,Pp3c1_32020V3.1				no
Pp3c1_sORF211	Chr01:11617970-11618051	92.2	CDS	Pp3c1_15560V3.2,Pp3c1_15560V3.1,Pp3c1_15560V3.3				no
Pp3c1_sORF2110	Chr01:22586584-22586794	54.7	CDS	Pp3c1_32020V3.2,Pp3c1_32020V3.1	Ceratodon	Ceratodon:1.6238		no
Pp3c1_sORF2111	Chr01:22587380-22587509	80.2	CDS	Pp3c1_32020V3.2,Pp3c1_32020V3.1				no
Pp3c1_sORF2112	Chr01:22588795-22588993	36.9	five_prime_UTR	Pp3c1_32020V3.1				no
Pp3c1_sORF2113	Chr01:22660419-22660455	97.9	CDS	Pp3c1_32090V3.2				no
Pp3c1_sORF2114	Chr01:22660676-22660787	87.6	CDS	Pp3c1_32090V3.2				no
Pp3c1_sORF2115	Chr01:226617-226725	96.2	CDS	Pp3c1_430V3.5,Pp3c1_430V3.1,Pp3c1_430V3.3,Pp3c1_430V3.2,Pp3c1_430V3.4	Ceratodon	Ceratodon:0.9421		no
Pp3c1_sORF2116	Chr01:22666384-22666501	94.7	Interlaced	Pp3c1_32090V3.2	Ceratodon	Ceratodon:2.916		no
Pp3c1_sORF2117	Chr01:226812-226884	99.5	CDS	Pp3c1_430V3.5,Pp3c1_430V3.1,Pp3c1_430V3.3,Pp3c1_430V3.2,Pp3c1_430V3.4				no
Pp3c1_sORF2118	Chr01:22621594-22621693	81.5	Interlaced	Pp3c1_32070V3.4,Pp3c1_32070V3.1,Pp3c1_32070V3.2,Pp3c1_32070V3.3				no
Pp3c1_sORF2119	Chr01:22687512-22687656	98.2	lncRNA	Pp3c1_32190V3.1 | lncRNAs: CNT0033414,CNT0033415,CNT0033416,CNT0033417				no
Pp3c1_sORF212	Chr01:11618060-11618270	100	CDS	Pp3c1_15560V3.2,Pp3c1_15560V3.1,Pp3c1_15560V3.3				no
Pp3c1_sORF2120	Chr01:22687713-22687803	80.2	lncRNA	Pp3c1_32190V3.1 | lncRNAs: CNT0033414,CNT0033415,CNT0033416,CNT0033417				no
Pp3c1_sORF2121	Chr01:22623729-22623834	93.3	five_prime_UTR	Pp3c1_32070V3.4,Pp3c1_32070V3.1			Excision,Start codon excision	no
Pp3c1_sORF2122	Chr01:22623857-22624007	84.3	five_prime_UTR	Pp3c1_32070V3.4,Pp3c1_32070V3.1			Stop codon excision	no
Pp3c1_sORF2123	Chr01:22693917-22693974	94.7	five_prime_UTR	Pp3c1_32210V3.2,Pp3c1_32210V3.1				no
Pp3c1_sORF2124	Chr01:22695020-22695089	93	five_prime_UTR	Pp3c1_32210V3.4,Pp3c1_32210V3.2			Stop codon excision	no
Pp3c1_sORF2125	Chr01:22695613-22695667	97.5	CDS	Pp3c1_32210V3.4,Pp3c1_32210V3.3,Pp3c1_32210V3.2,Pp3c1_32210V3.1				no
Pp3c1_sORF2126	Chr01:22695745-22695832	97.4	CDS	Pp3c1_32210V3.4,Pp3c1_32210V3.3,Pp3c1_32210V3.2,Pp3c1_32210V3.1				no
Pp3c1_sORF2127	Chr01:22695871-22696087	68.4	CDS	Pp3c1_32210V3.4,Pp3c1_32210V3.3,Pp3c1_32210V3.2,Pp3c1_32210V3.1				no
Pp3c1_sORF2128	Chr01:22696237-22696369	100	CDS	Pp3c1_32210V3.4,Pp3c1_32210V3.3,Pp3c1_32210V3.2,Pp3c1_32210V3.1				no
Pp3c1_sORF2129	Chr01:22696468-22696621	92.9	CDS	Pp3c1_32210V3.4,Pp3c1_32210V3.3,Pp3c1_32210V3.2,Pp3c1_32210V3.1				no
Pp3c1_sORF213	Chr01:11618367-11618424	90.3	CDS	Pp3c1_15560V3.2,Pp3c1_15560V3.1,Pp3c1_15560V3.3				no
Pp3c1_sORF2130	Chr01:22696945-22697053	80.8	CDS	Pp3c1_32210V3.4,Pp3c1_32210V3.3,Pp3c1_32210V3.2,Pp3c1_32210V3.1				no
Pp3c1_sORF2131	Chr01:22697068-22697110	97.8	CDS	Pp3c1_32210V3.4,Pp3c1_32210V3.3,Pp3c1_32210V3.2,Pp3c1_32210V3.1				no
Pp3c1_sORF2132	Chr01:22697296-22697377	100	CDS	Pp3c1_32210V3.4,Pp3c1_32210V3.3,Pp3c1_32210V3.2,Pp3c1_32210V3.1				no
Pp3c1_sORF2133	Chr01:22697413-22697455	98.9	CDS	Pp3c1_32210V3.4,Pp3c1_32210V3.3,Pp3c1_32210V3.2,Pp3c1_32210V3.1				no
Pp3c1_sORF2134	Chr01:22697668-22697956	60.8	CDS	Pp3c1_32210V3.4,Pp3c1_32210V3.3,Pp3c1_32210V3.2,Pp3c1_32210V3.1				no
Pp3c1_sORF2135	Chr01:22720144-22720342	66.4	CDS	Pp3c1_32249V3.1				no
Pp3c1_sORF2136	Chr01:227253-227307	99.5	CDS	Pp3c1_430V3.5,Pp3c1_430V3.1,Pp3c1_430V3.3,Pp3c1_430V3.2,Pp3c1_430V3.4				no
Pp3c1_sORF2137	Chr01:22669547-22669580	99.7	CDS	Pp3c1_32090V3.2				no
Pp3c1_sORF2138	Chr01:22670121-22670172	97.7	CDS	Pp3c1_32120V3.4				no
Pp3c1_sORF2139	Chr01:22734505-22734691	98.8	CDS	Pp3c1_32280V3.1,Pp3c1_32280V3.2	Ceratodon,Sphagnum	Ceratodon:1.1137,Sphagnum:1.4512		no
Pp3c1_sORF214	Chr01:11618429-11618516	92.8	CDS	Pp3c1_15560V3.2,Pp3c1_15560V3.1,Pp3c1_15560V3.3				no
Pp3c1_sORF2140	Chr01:22735124-22735163	96.5	three_prime_UTR	Pp3c1_32280V3.1				no
Pp3c1_sORF2141	Chr01:22672096-22672141	97.8	CDS	Pp3c1_32120V3.4				no
Pp3c1_sORF2142	Chr01:22674620-22674707	100	CDS	Pp3c1_32120V3.4				no
Pp3c1_sORF2143	Chr01:22741899-22742061	94.8	CDS	Pp3c1_32300V3.2,Pp3c1_32300V3.3	Ceratodon,Selaginella,Sphagnum	Ceratodon:99,Sphagnum:3.0178,Selaginella:4.8981		no
Pp3c1_sORF2144	Chr01:22742410-22742515	95.8	CDS	Pp3c1_32300V3.2,Pp3c1_32300V3.3	Ceratodon	Ceratodon:3.0481		no
Pp3c1_sORF2145	Chr01:22742851-22742908	91.9	CDS	Pp3c1_32300V3.2,Pp3c1_32300V3.3				no
Pp3c1_sORF2146	Chr01:22745432-22745474	97.7	CDS	Pp3c1_32300V3.2,Pp3c1_32300V3.3				no
Pp3c1_sORF2147	Chr01:22745525-22745576	96.5	CDS	Pp3c1_32300V3.2,Pp3c1_32300V3.3				no
Pp3c1_sORF2148	Chr01:22745696-22745744	94.2	CDS	Pp3c1_32300V3.2,Pp3c1_32300V3.3				no
Pp3c1_sORF2149	Chr01:22745765-22745822	93.1	CDS	Pp3c1_32300V3.2,Pp3c1_32300V3.3				no
Pp3c1_sORF215	Chr01:11619705-11619783	98.7	CDS	Pp3c1_15560V3.2,Pp3c1_15560V3.3				no
Pp3c1_sORF2150	Chr01:22745885-22746101	94.7	CDS	Pp3c1_32300V3.2,Pp3c1_32300V3.3	Ceratodon,Sphagnum	Ceratodon:99,Sphagnum:5.734		no
Pp3c1_sORF2151	Chr01:22746668-22746713	100	CDS	Pp3c1_32300V3.2,Pp3c1_32300V3.3				no
Pp3c1_sORF2152	Chr01:22746713-22746770	99.8	CDS	Pp3c1_32300V3.2,Pp3c1_32300V3.3				no
Pp3c1_sORF2153	Chr01:22746866-22746923	99.2	CDS	Pp3c1_32300V3.2,Pp3c1_32300V3.3				no
Pp3c1_sORF2154	Chr01:22747325-22747394	96.3	CDS	Pp3c1_32300V3.2,Pp3c1_32300V3.3				no
Pp3c1_sORF2155	Chr01:22683427-22683535	81.8	Interlaced	Pp3c1_32170V3.5,Pp3c1_32170V3.3,Pp3c1_32170V3.4,Pp3c1_32170V3.1,Pp3c1_32170V3.2,Pp3c1_32170V3.6,Pp3c1_32170V3.7				no
Pp3c1_sORF2156	Chr01:22706079-22706118	97	CDS	Pp3c1_32210V3.4				no
Pp3c1_sORF2157	Chr01:22706351-22706480	69.2	CDS	Pp3c1_32220V3.3				no
Pp3c1_sORF2158	Chr01:22707924-22708038	100	five_prime_UTR,CDS	Pp3c1_32220V3.1,Pp3c1_32220V3.3,Pp3c1_32220V3.2				no
Pp3c1_sORF2159	Chr01:22708044-22708080	99.7	five_prime_UTR,CDS	Pp3c1_32220V3.1,Pp3c1_32220V3.3,Pp3c1_32220V3.2				no
Pp3c1_sORF216	Chr01:11620413-11620575	71.5	three_prime_UTR	Pp3c1_15560V3.2,Pp3c1_15560V3.3				no
Pp3c1_sORF2160	Chr01:22708297-22708357	95.1	five_prime_UTR	Pp3c1_32220V3.1,Pp3c1_32220V3.3,Pp3c1_32220V3.2				no
Pp3c1_sORF2161	Chr01:22708343-22708484	56.2	five_prime_UTR	Pp3c1_32220V3.1,Pp3c1_32220V3.3,Pp3c1_32220V3.2				no
Pp3c1_sORF2162	Chr01:22714273-22714384	78.3	three_prime_UTR	Pp3c1_32230V3.8,Pp3c1_32230V3.4,Pp3c1_32230V3.3,Pp3c1_32230V3.1			Stop codon excision	no
Pp3c1_sORF2163	Chr01:22715944-22716007	99.3	CDS	Pp3c1_32230V3.2,Pp3c1_32230V3.4,Pp3c1_32230V3.6,Pp3c1_32230V3.9,Pp3c1_32230V3.1,Pp3c1_32230V3.7,Pp3c1_32230V3.8,Pp3c1_32230V3.5,Pp3c1_32230V3.3				no
Pp3c1_sORF2164	Chr01:22716518-22716629	88.4	five_prime_UTR	Pp3c1_32230V3.2,Pp3c1_32230V3.4,Pp3c1_32230V3.6,Pp3c1_32230V3.9,Pp3c1_32230V3.1,Pp3c1_32230V3.7,Pp3c1_32230V3.8,Pp3c1_32230V3.5,Pp3c1_32230V3.3				no
Pp3c1_sORF2165	Chr01:22716682-22716724	93.4	five_prime_UTR	Pp3c1_32230V3.2,Pp3c1_32230V3.4,Pp3c1_32230V3.6,Pp3c1_32230V3.9,Pp3c1_32230V3.1,Pp3c1_32230V3.7,Pp3c1_32230V3.8,Pp3c1_32230V3.5,Pp3c1_32230V3.3				no
Pp3c1_sORF2166	Chr01:22717722-22717755	97	five_prime_UTR	Pp3c1_32230V3.2,Pp3c1_32230V3.4,Pp3c1_32230V3.6,Pp3c1_32230V3.1,Pp3c1_32230V3.7,Pp3c1_32230V3.8,Pp3c1_32230V3.5,Pp3c1_32230V3.3				no
Pp3c1_sORF2167	Chr01:22723351-22723468	80.2	three_prime_UTR,CDS	Pp3c1_32249V3.1				no
Pp3c1_sORF2168	Chr01:22725961-22726129	96.3	CDS	Pp3c1_32260V3.1	Ceratodon,Sphagnum	Ceratodon:1.8122,Sphagnum:2.1937		no
Pp3c1_sORF2169	Chr01:22731949-22731991	97.2	lncRNA	Pp3c1_32260V3.3,Pp3c1_32270V3.1 | lncRNAs: lcl|Ppatens_Pp3c1_32270V3.1				no
Pp3c1_sORF217	Chr01:11441871-11441928	97.9	Interlaced	Pp3c1_15300V3.1				no
Pp3c1_sORF2170	Chr01:22806208-22806457	42884	five_prime_UTR	Pp3c1_32390V3.1,Pp3c1_32390V3.2				no
Pp3c1_sORF2171	Chr01:22806887-22806944	98.5	CDS	Pp3c1_32390V3.1,Pp3c1_32390V3.2				no
Pp3c1_sORF2172	Chr01:22755306-22755537	61.6	Interlaced	Pp3c1_32320V3.2,Pp3c1_32320V3.1				no
Pp3c1_sORF2173	Chr01:22761312-22761558	42851	five_prime_UTR	Pp3c1_32340V3.2				no
Pp3c1_sORF2174	Chr01:22836218-22836326	79.3	five_prime_UTR	Pp3c1_32420V3.2			Stop codon excision	no
Pp3c1_sORF2175	Chr01:22907702-22907777	88.3	five_prime_UTR	Pp3c1_32440V3.1,Pp3c1_32440V3.4,Pp3c1_32440V3.3,Pp3c1_32440V3.2				no
Pp3c1_sORF2176	Chr01:22908390-22908612	98.4	CDS	Pp3c1_32440V3.1,Pp3c1_32440V3.4,Pp3c1_32440V3.3,Pp3c1_32440V3.2				no
Pp3c1_sORF2177	Chr01:22908738-22909011	90.9	Interlaced	Pp3c1_32440V3.3			Stop codon excision	no
Pp3c1_sORF2178	Chr01:229254-229485	52.1	three_prime_UTR	Pp3c1_430V3.1				no
Pp3c1_sORF2179	Chr01:22936153-22936378	42883	five_prime_UTR	Pp3c1_32449V3.1				no
Pp3c1_sORF218	Chr01:11442383-11442428	89.4	five_prime_UTR	Pp3c1_15300V3.1				no
Pp3c1_sORF2180	Chr01:22937012-22937126	100	CDS	Pp3c1_32480V3.3				no
Pp3c1_sORF2181	Chr01:22938765-22938807	96.9	CDS	Pp3c1_32480V3.2				no
Pp3c1_sORF2182	Chr01:22938882-22938942	96.3	CDS	Pp3c1_32480V3.2				no
Pp3c1_sORF2183	Chr01:22939288-22939396	96.5	CDS	Pp3c1_32480V3.2				no
Pp3c1_sORF2184	Chr01:22939531-22939570	95	CDS	Pp3c1_32480V3.2				no
Pp3c1_sORF2185	Chr01:22966384-22966501	83.8	lncRNA	Pp3c1_32509V3.1 | lncRNAs: lcl|Ppatens_Pp3c1_32509V3.1				no
Pp3c1_sORF2186	Chr01:22966906-22966942	98.9	lncRNA	Pp3c1_32509V3.1 | lncRNAs: lcl|Ppatens_Pp3c1_32509V3.1				no
Pp3c1_sORF2187	Chr01:22917056-22917191	73.9	lncRNA	Pp3c1_32449V3.1 | lncRNAs: lcl|Ppatens_Pp3c1_32449V3.1				no
Pp3c1_sORF2188	Chr01:23005382-23005523	80.8	five_prime_UTR	Pp3c1_32540V3.2,Pp3c1_32540V3.1				no
Pp3c1_sORF2189	Chr01:23005899-23006145	42821	five_prime_UTR	Pp3c1_32540V3.2,Pp3c1_32540V3.1				no
Pp3c1_sORF219	Chr01:11442853-11442898	93	lncRNA	Pp3c1_15310V3.1 | lncRNAs: CNT0033438				no
Pp3c1_sORF2190	Chr01:23009450-23009636	94.9	CDS	Pp3c1_32540V3.2,Pp3c1_32540V3.1,Pp3c1_32540V3.3				no
Pp3c1_sORF2191	Chr01:23010895-23010934	96.5	CDS	Pp3c1_32540V3.2,Pp3c1_32540V3.1,Pp3c1_32540V3.3				no
Pp3c1_sORF2192	Chr01:23024773-23024896	83.8	CDS	Pp3c1_32590V3.1,Pp3c1_32590V3.3,Pp3c1_32590V3.2				no
Pp3c1_sORF2193	Chr01:23025892-23026015	99.1	CDS	Pp3c1_32590V3.1,Pp3c1_32590V3.3,Pp3c1_32590V3.2				no
Pp3c1_sORF2194	Chr01:23026270-23026417	97.7	CDS	Pp3c1_32590V3.1,Pp3c1_32590V3.3,Pp3c1_32590V3.2	Ceratodon	Ceratodon:0.7094		no
Pp3c1_sORF2195	Chr01:23026531-23026693	79.6	CDS	Pp3c1_32590V3.1,Pp3c1_32590V3.3,Pp3c1_32590V3.2				no
Pp3c1_sORF2196	Chr01:23026729-23026861	97.1	CDS	Pp3c1_32590V3.1,Pp3c1_32590V3.3,Pp3c1_32590V3.2				no
Pp3c1_sORF2197	Chr01:23027824-23027872	96.9	CDS	Pp3c1_32590V3.1,Pp3c1_32590V3.3,Pp3c1_32590V3.2				no
Pp3c1_sORF2198	Chr01:23027938-23028097	90.4	CDS	Pp3c1_32590V3.1,Pp3c1_32590V3.3,Pp3c1_32590V3.2	Arabidopsis,Ceratodon,Oryza,Sphagnum,Spirodela	Ceratodon:1.276,Sphagnum:3.7822,Oryza:2.7941,Arabidopsis:1.2528,Spirodela:2.7525		no
Pp3c1_sORF2199	Chr01:23029298-23029499	61.3	CDS	Pp3c1_32590V3.1,Pp3c1_32590V3.3,Pp3c1_32590V3.2	Ceratodon	Ceratodon:2.1749		no
Pp3c1_sORF22	Chr01:9909955-9910186	81.7	five_prime_UTR	Pp3c1_13600V3.1				no
Pp3c1_sORF220	Chr01:11443282-11443327	98.8	lncRNA	Pp3c1_15310V3.1,Pp3c1_15310V3.2 | lncRNAs: CNT0033438				no
Pp3c1_sORF2200	Chr01:23029529-23029610	94.2	Interlaced	Pp3c1_32590V3.1,Pp3c1_32590V3.3,Pp3c1_32590V3.2				no
Pp3c1_sORF2201	Chr01:23029656-23029938	42963	three_prime_UTR	Pp3c1_32590V3.1,Pp3c1_32590V3.2			Stop codon excision	no
Pp3c1_sORF2202	Chr01:22981044-22981185	98.6	CDS	Pp3c1_32520V3.2,Pp3c1_32520V3.4,Pp3c1_32520V3.1,Pp3c1_32520V3.3				no
Pp3c1_sORF2203	Chr01:23013219-23013402	98.2	Interlaced	Pp3c1_32560V3.1,Pp3c1_32560V3.2				no
Pp3c1_sORF2204	Chr01:23013471-23013576	96.2	CDS	Pp3c1_32560V3.1,Pp3c1_32560V3.2				no
Pp3c1_sORF2205	Chr01:23014858-23014897	97.3	three_prime_UTR	Pp3c1_32560V3.1				no
Pp3c1_sORF2206	Chr01:23015249-23015333	92.9	three_prime_UTR	Pp3c1_32570V3.2				no
Pp3c1_sORF2207	Chr01:23015526-23015673	91.5	Interlaced	Pp3c1_32570V3.2				no
Pp3c1_sORF2208	Chr01:23017638-23017707	92.6	CDS	Pp3c1_32570V3.2				no
Pp3c1_sORF2209	Chr01:23019025-23019109	95.1	five_prime_UTR	Pp3c1_32570V3.2,Pp3c1_32570V3.1				no
Pp3c1_sORF221	Chr01:11446373-11446463	98.8	CDS	Pp3c1_15310V3.1,Pp3c1_15310V3.2				no
Pp3c1_sORF2210	Chr01:23021034-23021100	99.8	five_prime_UTR,CDS	Pp3c1_32570V3.2,Pp3c1_32580V3.2				no
Pp3c1_sORF2211	Chr01:23021130-23021193	98.9	five_prime_UTR,CDS	Pp3c1_32580V3.2,Pp3c1_32580V3.1				no
Pp3c1_sORF2212	Chr01:23021448-23021532	99.9	five_prime_UTR,CDS	Pp3c1_32580V3.2,Pp3c1_32580V3.1				no
Pp3c1_sORF2213	Chr01:23121068-23121209	91.2	Intergenic	ID=XLOC_022478|TCONS_00038332				no
Pp3c1_sORF2214	Chr01:23059400-23059667	95.6	CDS	Pp3c1_32600V3.5,Pp3c1_32600V3.4,Pp3c1_32600V3.6,Pp3c1_32600V3.3,Pp3c1_32600V3.2,Pp3c1_32600V3.1,Pp3c1_32600V3.7				no
Pp3c1_sORF2215	Chr01:23123634-23123754	86.2	five_prime_UTR	Pp3c1_32730V3.2				no
Pp3c1_sORF2216	Chr01:23059901-23060075	95.4	CDS	Pp3c1_32600V3.5,Pp3c1_32600V3.4,Pp3c1_32600V3.6,Pp3c1_32600V3.3,Pp3c1_32600V3.2,Pp3c1_32600V3.1,Pp3c1_32600V3.7				no
Pp3c1_sORF2217	Chr01:23060240-23060291	99.2	CDS	Pp3c1_32600V3.5,Pp3c1_32600V3.4,Pp3c1_32600V3.6,Pp3c1_32600V3.3,Pp3c1_32600V3.2,Pp3c1_32600V3.1,Pp3c1_32600V3.7				no
Pp3c1_sORF2218	Chr01:23125075-23125213	82.1	five_prime_UTR	Pp3c1_32730V3.2,Pp3c1_32730V3.1				no
Pp3c1_sORF2219	Chr01:23125989-23126133	87.5	CDS	Pp3c1_32730V3.2,Pp3c1_32730V3.1				no
Pp3c1_sORF222	Chr01:11676881-11677067	35.8	lncRNA	Pp3c1_15635V3.1 | lncRNAs: lcl|Ppatens_Pp3c1_15635V3.1				no
Pp3c1_sORF2220	Chr01:23126160-23126244	99.7	CDS	Pp3c1_32730V3.2,Pp3c1_32730V3.1				no
Pp3c1_sORF2221	Chr01:23062335-23062434	75.6	five_prime_UTR	Pp3c1_32600V3.5,Pp3c1_32600V3.4,Pp3c1_32600V3.6,Pp3c1_32600V3.3,Pp3c1_32600V3.2,Pp3c1_32600V3.1,Pp3c1_32600V3.7				no
Pp3c1_sORF2222	Chr01:23062355-23062649	34.6	five_prime_UTR	Pp3c1_32600V3.5,Pp3c1_32600V3.4,Pp3c1_32600V3.6,Pp3c1_32600V3.3,Pp3c1_32600V3.2,Pp3c1_32600V3.1,Pp3c1_32600V3.7				no
Pp3c1_sORF2223	Chr01:23128549-23128585	100	CDS	Pp3c1_32730V3.2,Pp3c1_32730V3.1				no
Pp3c1_sORF2224	Chr01:23130527-23130584	97.9	five_prime_UTR	Pp3c1_32730V3.2				no
Pp3c1_sORF2225	Chr01:23132535-23132568	94.6	CDS	Pp3c1_32740V3.2				no
Pp3c1_sORF2226	Chr01:23147260-23147347	87.9	CDS	Pp3c1_32760V3.3,Pp3c1_32760V3.2,Pp3c1_32760V3.1				no
Pp3c1_sORF2227	Chr01:23148213-23148300	91	CDS	Pp3c1_32760V3.3,Pp3c1_32760V3.2,Pp3c1_32760V3.1				no
Pp3c1_sORF2228	Chr01:23168316-23168364	99.8	lncRNA	Pp3c1_32820V3.1,Pp3c1_32820V3.2,Pp3c1_32820V3.3 | lncRNAs: CNT0033019,CNT0033021,CNT0033020,CNT0033023,CNT0033022				no
Pp3c1_sORF2229	Chr01:23170921-23170954	97.5	CDS	Pp3c1_32830V3.1				no
Pp3c1_sORF223	Chr01:11677060-11677213	91.3	lncRNA	Pp3c1_15635V3.1 | lncRNAs: lcl|Ppatens_Pp3c1_15635V3.1				no
Pp3c1_sORF2230	Chr01:23173437-23173566	81.8	Interlaced	Pp3c1_32835V3.1				no
Pp3c1_sORF2231	Chr01:23137429-23137486	99.5	CDS	Pp3c1_32750V3.2,Pp3c1_32750V3.1				no
Pp3c1_sORF2232	Chr01:23137528-23137561	98.1	CDS	Pp3c1_32750V3.2,Pp3c1_32750V3.1				no
Pp3c1_sORF2233	Chr01:23154088-23154124	94.8	CDS	Pp3c1_32770V3.2,Pp3c1_32770V3.1,Pp3c1_32770V3.3				no
Pp3c1_sORF2234	Chr01:23154415-23154547	77	CDS	Pp3c1_32770V3.2,Pp3c1_32770V3.1,Pp3c1_32770V3.3				no
Pp3c1_sORF2235	Chr01:23154715-23154880	100	CDS	Pp3c1_32770V3.2,Pp3c1_32770V3.1,Pp3c1_32770V3.3				no
Pp3c1_sORF2236	Chr01:23155135-23155261	76.5	CDS	Pp3c1_32770V3.2,Pp3c1_32770V3.1,Pp3c1_32770V3.3				no
Pp3c1_sORF2237	Chr01:23155318-23155381	99.8	CDS	Pp3c1_32770V3.2,Pp3c1_32770V3.1,Pp3c1_32770V3.3				no
Pp3c1_sORF2238	Chr01:23158268-23158379	82.2	lncRNA	Pp3c1_32779V3.1 | lncRNAs: lcl|Ppatens_Pp3c1_32779V3.1				no
Pp3c1_sORF2239	Chr01:23158347-23158428	92.1	lncRNA	Pp3c1_32779V3.1 | lncRNAs: lcl|Ppatens_Pp3c1_32779V3.1				no
Pp3c1_sORF224	Chr01:11677890-11678079	61	lncRNA	Pp3c1_15635V3.1 | lncRNAs: lcl|Ppatens_Pp3c1_15635V3.1				no
Pp3c1_sORF2240	Chr01:23166153-23166270	97.6	Interlaced	Pp3c1_32810V3.3,Pp3c1_32810V3.1,Pp3c1_32810V3.2				no
Pp3c1_sORF2241	Chr01:23166732-23166765	98.8	CDS	Pp3c1_32810V3.3,Pp3c1_32810V3.1,Pp3c1_32810V3.2				no
Pp3c1_sORF2242	Chr01:23166942-23167113	100	CDS	Pp3c1_32810V3.1,Pp3c1_32810V3.2			Start codon excision	no
Pp3c1_sORF2243	Chr01:23167236-23167302	96.8	CDS	Pp3c1_32810V3.3,Pp3c1_32810V3.1,Pp3c1_32810V3.2				no
Pp3c1_sORF2244	Chr01:1951652-1951769	82	CDS	Pp3c1_2650V3.1,Pp3c1_2650V3.2				no
Pp3c1_sORF2245	Chr01:23177793-23177829	99.8	CDS	Pp3c1_32850V3.1,Pp3c1_32850V3.2				no
Pp3c1_sORF2246	Chr01:23178259-23178346	91.1	CDS	Pp3c1_32850V3.1,Pp3c1_32850V3.2				no
Pp3c1_sORF2247	Chr01:23179937-23180042	99.6	CDS	Pp3c1_32850V3.1,Pp3c1_32850V3.2				no
Pp3c1_sORF2248	Chr01:23180345-23180405	99.5	CDS	Pp3c1_32850V3.1,Pp3c1_32850V3.2				no
Pp3c1_sORF2249	Chr01:23181813-23181963	52	five_prime_UTR	Pp3c1_32850V3.1				no
Pp3c1_sORF225	Chr01:11678286-11678328	94.8	lncRNA	Pp3c1_15635V3.1 | lncRNAs: lcl|Ppatens_Pp3c1_15635V3.1				no
Pp3c1_sORF2250	Chr01:23181904-23182018	78.4	five_prime_UTR	Pp3c1_32850V3.1				no
Pp3c1_sORF2251	Chr01:23192844-23192877	96	CDS	Pp3c1_32870V3.2,Pp3c1_32870V3.1				no
Pp3c1_sORF2252	Chr01:23198705-23198831	99.9	CDS	Pp3c1_32870V3.2,Pp3c1_32870V3.1				no
Pp3c1_sORF2253	Chr01:23264651-23264699	99.8	CDS	Pp3c1_33030V3.2				no
Pp3c1_sORF2254	Chr01:23264854-23264896	97.7	CDS	Pp3c1_33030V3.2				no
Pp3c1_sORF2255	Chr01:23272785-23272875	91.9	Intergenic	ID=XLOC_022469|TCONS_00038319				no
Pp3c1_sORF2256	Chr01:23275554-23275701	99	Interlaced	Pp3c1_33050V3.4,Pp3c1_33050V3.1			Start codon excision	no
Pp3c1_sORF2257	Chr01:23276862-23276997	83.1	three_prime_UTR	Pp3c1_33050V3.2,Pp3c1_33050V3.3,Pp3c1_33050V3.1				no
Pp3c1_sORF2258	Chr01:23213727-23213772	92.8	CDS	Pp3c1_32910V3.5,Pp3c1_32910V3.8,Pp3c1_32910V3.2,Pp3c1_32910V3.1,Pp3c1_32910V3.6,Pp3c1_32910V3.7,Pp3c1_32910V3.9,Pp3c1_32910V3.4,Pp3c1_32910V3.3				no
Pp3c1_sORF2259	Chr01:23233006-23233135	82.2	three_prime_UTR	Pp3c1_32940V3.1			Start codon excision	no
Pp3c1_sORF226	Chr01:11678431-11678656	73.3	lncRNA	Pp3c1_15635V3.1 | lncRNAs: lcl|Ppatens_Pp3c1_15635V3.1				no
Pp3c1_sORF2260	Chr01:23236648-23236681	98.8	CDS	Pp3c1_32943V3.2				no
Pp3c1_sORF2261	Chr01:23239766-23239802	95.9	CDS	Pp3c1_32943V3.2				no
Pp3c1_sORF2262	Chr01:23241159-23241330	38.6	lncRNA	Pp3c1_32960V3.1,Pp3c1_32960V3.3 | lncRNAs: lcl|Ppatens_Pp3c1_32960V3.3				no
Pp3c1_sORF2263	Chr01:23242385-23242448	91.1	CDS	Pp3c1_32960V3.1,Pp3c1_32960V3.2				no
Pp3c1_sORF2264	Chr01:23243907-23244030	99.6	CDS	Pp3c1_32960V3.1,Pp3c1_32960V3.2				no
Pp3c1_sORF2265	Chr01:23244192-23244264	97.6	CDS	Pp3c1_32960V3.1,Pp3c1_32960V3.2				no
Pp3c1_sORF2266	Chr01:23244527-23244620	86.5	CDS	Pp3c1_32960V3.1,Pp3c1_32960V3.2				no
Pp3c1_sORF2267	Chr01:23245758-23245824	98.3	CDS	Pp3c1_32960V3.1,Pp3c1_32960V3.2				no
Pp3c1_sORF2268	Chr01:23246871-23246973	89.9	five_prime_UTR	Pp3c1_32960V3.1				no
Pp3c1_sORF2269	Chr01:23247496-23247586	85.8	Intergenic	ID=XLOC_022454|TCONS_00038277				no
Pp3c1_sORF227	Chr01:11693387-11693486	90.3	CDS	Pp3c1_15680V3.3,Pp3c1_15680V3.1,Pp3c1_15680V3.2				no
Pp3c1_sORF2270	Chr01:23315868-23315955	87.5	five_prime_UTR	Pp3c1_33100V3.1,Pp3c1_33100V3.2				no
Pp3c1_sORF2271	Chr01:23317322-23317403	99.9	CDS	Pp3c1_33100V3.1,Pp3c1_33100V3.2				no
Pp3c1_sORF2272	Chr01:23255636-23255711	94	CDS	Pp3c1_32990V3.1,Pp3c1_32995V3.3,Pp3c1_32995V3.2,Pp3c1_32995V3.1				no
Pp3c1_sORF2273	Chr01:23256399-23256474	95.3	CDS	Pp3c1_32990V3.1,Pp3c1_32995V3.3,Pp3c1_32995V3.2,Pp3c1_32995V3.1				no
Pp3c1_sORF2274	Chr01:23320323-23320443	87.5	CDS	Pp3c1_33100V3.1,Pp3c1_33100V3.2	Ceratodon	Ceratodon:4.5228		no
Pp3c1_sORF2275	Chr01:23256960-23257011	99.9	CDS	Pp3c1_32990V3.1,Pp3c1_32995V3.3,Pp3c1_32995V3.2,Pp3c1_32995V3.1				no
Pp3c1_sORF2276	Chr01:23320909-23321002	100	CDS	Pp3c1_33100V3.1,Pp3c1_33100V3.2				no
Pp3c1_sORF2277	Chr01:23321005-23321101	99.7	CDS	Pp3c1_33100V3.1,Pp3c1_33100V3.2				no
Pp3c1_sORF2278	Chr01:23321113-23321239	99.9	CDS	Pp3c1_33100V3.1,Pp3c1_33100V3.2				no
Pp3c1_sORF2279	Chr01:23321293-23321500	32.1	Interlaced	Pp3c1_33100V3.1,Pp3c1_33100V3.2				no
Pp3c1_sORF228	Chr01:11693518-11693674	71	CDS	Pp3c1_15680V3.3,Pp3c1_15680V3.1,Pp3c1_15680V3.2				no
Pp3c1_sORF2280	Chr01:23257919-23257982	89.7	five_prime_UTR	Pp3c1_32995V3.2			Excision	no
Pp3c1_sORF2281	Chr01:23323925-23324015	99.4	lncRNA	Pp3c1_33113V3.1 | lncRNAs: lcl|Ppatens_Pp3c1_33113V3.1				no
Pp3c1_sORF2282	Chr01:23260925-23260973	92	lncRNA	Pp3c1_33010V3.4,Pp3c1_33010V3.2 | lncRNAs: lcl|Ppatens_Pp3c1_33010V3.2,lcl|Ppatens_Pp3c1_33010V3.4,CNT0033025,CNT0033027,CNT0033026				no
Pp3c1_sORF2283	Chr01:23326277-23326325	92.7	CDS	Pp3c1_33120V3.2,Pp3c1_33120V3.3,Pp3c1_33120V3.1				no
Pp3c1_sORF2284	Chr01:23327049-23327091	92.4	CDS	Pp3c1_33120V3.2,Pp3c1_33120V3.3,Pp3c1_33120V3.1				no
Pp3c1_sORF2285	Chr01:23328203-23328278	95.3	three_prime_UTR	Pp3c1_33120V3.2,Pp3c1_33120V3.3,Pp3c1_33120V3.1				no
Pp3c1_sORF2286	Chr01:23328381-23328432	100	three_prime_UTR	Pp3c1_33120V3.2,Pp3c1_33120V3.3,Pp3c1_33120V3.1				no
Pp3c1_sORF2287	Chr01:23288999-23289113	94.8	CDS	Pp3c1_33070V3.4,Pp3c1_33070V3.3,Pp3c1_33070V3.1,Pp3c1_33070V3.2,Pp3c1_33070V3.6,Pp3c1_33070V3.5				no
Pp3c1_sORF2288	Chr01:23289565-23289628	85.6	five_prime_UTR	Pp3c1_33070V3.6			Excision	no
Pp3c1_sORF2289	Chr01:23289689-23289836	68.2	five_prime_UTR	Pp3c1_33070V3.6			Excision	no
Pp3c1_sORF229	Chr01:11693689-11693764	98.8	CDS	Pp3c1_15680V3.3,Pp3c1_15680V3.1,Pp3c1_15680V3.2				no
Pp3c1_sORF2290	Chr01:23289940-23290081	94.5	five_prime_UTR	Pp3c1_33070V3.6			Excision,Stop codon excision	no
Pp3c1_sORF2291	Chr01:23311294-23311372	91.6	three_prime_UTR	Pp3c1_33080V3.10,Pp3c1_33080V3.11,Pp3c1_33070V3.3				no
Pp3c1_sORF2292	Chr01:23311308-23311398	99.4	three_prime_UTR	Pp3c1_33080V3.10,Pp3c1_33080V3.11,Pp3c1_33080V3.6				no
Pp3c1_sORF2293	Chr01:23311621-23311792	93.8	three_prime_UTR	Pp3c1_33080V3.10,Pp3c1_33080V3.11,Pp3c1_33080V3.6				no
Pp3c1_sORF2294	Chr01:23286928-23287153	70.2	three_prime_UTR	Pp3c1_33070V3.4,Pp3c1_33070V3.3,Pp3c1_33070V3.1,Pp3c1_33070V3.2,Pp3c1_33070V3.6,Pp3c1_33070V3.5				no
Pp3c1_sORF2295	Chr01:23287349-23287454	86.4	three_prime_UTR,CDS	Pp3c1_33070V3.4,Pp3c1_33070V3.3,Pp3c1_33070V3.1,Pp3c1_33070V3.2,Pp3c1_33070V3.6,Pp3c1_33070V3.5				no
Pp3c1_sORF2296	Chr01:23341615-23341672	89.8	three_prime_UTR	Pp3c1_33130V3.3,Pp3c1_33130V3.2,Pp3c1_33130V3.1				no
Pp3c1_sORF2297	Chr01:23343009-23343066	87.8	CDS	Pp3c1_33130V3.3,Pp3c1_33130V3.2,Pp3c1_33130V3.1				no
Pp3c1_sORF2298	Chr01:23343129-23343270	99.8	CDS	Pp3c1_33130V3.3,Pp3c1_33130V3.2,Pp3c1_33130V3.1	Ceratodon	Ceratodon:2.6058		no
Pp3c1_sORF2299	Chr01:23344265-23344349	82.2	five_prime_UTR	Pp3c1_33130V3.3			Start codon excision	no
Pp3c1_sORF23	Chr01:9932850-9932952	86.4	Intergenic	ID=XLOC_034322|TCONS_00058686				no
Pp3c1_sORF230	Chr01:11693854-11694019	98.3	CDS	Pp3c1_15680V3.3,Pp3c1_15680V3.1,Pp3c1_15680V3.2				no
Pp3c1_sORF2300	Chr01:23344475-23344577	88.1	five_prime_UTR	Pp3c1_33130V3.3,Pp3c1_33130V3.2				no
Pp3c1_sORF2301	Chr01:23421493-23421595	99.4	CDS	Pp3c1_33190V3.4,Pp3c1_33190V3.1,Pp3c1_33190V3.2	Ceratodon	Ceratodon:0.9639	Start codon excision	no
Pp3c1_sORF2302	Chr01:23422589-23422664	86	three_prime_UTR	Pp3c1_33190V3.4,Pp3c1_33190V3.3,Pp3c1_33190V3.1,Pp3c1_33190V3.2				no
Pp3c1_sORF2303	Chr01:23369223-23369454	54.3	Interlaced	Pp3c1_33150V3.4,Pp3c1_33150V3.1,Pp3c1_33150V3.5,Pp3c1_33150V3.3,Pp3c1_33150V3.2	Ceratodon,Sphagnum	Ceratodon:1.4044,Sphagnum:1.1947		no
Pp3c1_sORF2304	Chr01:23369505-23369580	90.2	CDS	Pp3c1_33150V3.4,Pp3c1_33150V3.1,Pp3c1_33150V3.5,Pp3c1_33150V3.3,Pp3c1_33150V3.2				no
Pp3c1_sORF2305	Chr01:23369583-23369685	99.3	CDS	Pp3c1_33150V3.4,Pp3c1_33150V3.1,Pp3c1_33150V3.5,Pp3c1_33150V3.3,Pp3c1_33150V3.2				no
Pp3c1_sORF2306	Chr01:23379900-23379954	91.7	three_prime_UTR	Pp3c1_33180V3.5,Pp3c1_33180V3.6,Pp3c1_33180V3.4,Pp3c1_33180V3.1			Excision	no
Pp3c1_sORF2307	Chr01:23450926-23451064	76.8	five_prime_UTR	Pp3c1_33220V3.3,Pp3c1_33220V3.4,Pp3c1_33220V3.2				no
Pp3c1_sORF2308	Chr01:23451711-23451765	89.8	five_prime_UTR	Pp3c1_33220V3.3,Pp3c1_33220V3.4,Pp3c1_33220V3.2,Pp3c1_33220V3.1				no
Pp3c1_sORF2309	Chr01:23453943-23454003	99.9	CDS	Pp3c1_33220V3.3,Pp3c1_33220V3.4,Pp3c1_33220V3.2,Pp3c1_33220V3.1				no
Pp3c1_sORF231	Chr01:11694037-11694148	78	CDS	Pp3c1_15680V3.3,Pp3c1_15680V3.1,Pp3c1_15680V3.2				no
Pp3c1_sORF2310	Chr01:23454869-23454947	98	CDS	Pp3c1_33220V3.3,Pp3c1_33220V3.4,Pp3c1_33220V3.2,Pp3c1_33220V3.1				no
Pp3c1_sORF2311	Chr01:23456932-23456965	95.7	CDS	Pp3c1_33220V3.3,Pp3c1_33220V3.4,Pp3c1_33220V3.2,Pp3c1_33220V3.1				no
Pp3c1_sORF2312	Chr01:23457118-23457160	99.5	CDS	Pp3c1_33220V3.3,Pp3c1_33220V3.4,Pp3c1_33220V3.2,Pp3c1_33220V3.1				no
Pp3c1_sORF2313	Chr01:23457986-23458076	83.7	CDS	Pp3c1_33220V3.3,Pp3c1_33220V3.4,Pp3c1_33220V3.2,Pp3c1_33220V3.1				no
Pp3c1_sORF2314	Chr01:23458115-23458181	99.2	CDS	Pp3c1_33220V3.3,Pp3c1_33220V3.4,Pp3c1_33220V3.2,Pp3c1_33220V3.1				no
Pp3c1_sORF2315	Chr01:23460604-23460670	99.3	three_prime_UTR	Pp3c1_33220V3.3,Pp3c1_33220V3.4,Pp3c1_33220V3.2,Pp3c1_33220V3.1				no
Pp3c1_sORF2316	Chr01:23462190-23462229	99	five_prime_UTR	Pp3c1_33240V3.1				no
Pp3c1_sORF2317	Chr01:23462516-23462723	36.8	five_prime_UTR	Pp3c1_33240V3.1				no
Pp3c1_sORF2318	Chr01:23462862-23462955	91.7	CDS	Pp3c1_33240V3.1,Pp3c1_33240V3.2				no
Pp3c1_sORF2319	Chr01:23523514-23523565	94.3	CDS	Pp3c1_33250V3.1				no
Pp3c1_sORF232	Chr01:11694577-11694724	94.8	CDS	Pp3c1_15680V3.3,Pp3c1_15680V3.1,Pp3c1_15680V3.2				no
Pp3c1_sORF2320	Chr01:23527150-23527237	85	five_prime_UTR	Pp3c1_33270V3.1				no
Pp3c1_sORF2321	Chr01:23527690-23527780	85.2	five_prime_UTR	Pp3c1_33270V3.1				no
Pp3c1_sORF2322	Chr01:23527853-23527928	86.3	five_prime_UTR	Pp3c1_33270V3.1				no
Pp3c1_sORF2323	Chr01:23529095-23529134	96.4	five_prime_UTR	Pp3c1_33270V3.2,Pp3c1_33270V3.1				no
Pp3c1_sORF2324	Chr01:23529493-23529616	94.7	CDS	Pp3c1_33270V3.2,Pp3c1_33270V3.1				no
Pp3c1_sORF2325	Chr01:23532487-23532664	69.5	three_prime_UTR	Pp3c1_33270V3.2				no
Pp3c1_sORF2326	Chr01:23532581-23532782	51	three_prime_UTR	Pp3c1_33270V3.2				no
Pp3c1_sORF2327	Chr01:23536427-23536604	68	five_prime_UTR	Pp3c1_33300V3.1,Pp3c1_33300V3.2				no
Pp3c1_sORF2328	Chr01:23536827-23536890	97.1	CDS	Pp3c1_33300V3.1,Pp3c1_33300V3.2				no
Pp3c1_sORF2329	Chr01:23536911-23536974	100	CDS	Pp3c1_33300V3.1,Pp3c1_33300V3.2				no
Pp3c1_sORF233	Chr01:11694728-11694923	65.9	Interlaced	Pp3c1_15680V3.3,Pp3c1_15680V3.1,Pp3c1_15680V3.2	Ceratodon	Ceratodon:13.5873		no
Pp3c1_sORF2330	Chr01:23537667-23537742	97.7	CDS	Pp3c1_33300V3.1,Pp3c1_33300V3.2				no
Pp3c1_sORF2331	Chr01:23540490-23540604	99.9	five_prime_UTR	Pp3c1_33300V3.2				no
Pp3c1_sORF2332	Chr01:23542057-23542126	91.5	CDS	Pp3c1_33320V3.1,Pp3c1_33320V3.2				no
Pp3c1_sORF2333	Chr01:23542874-23542952	94.1	CDS	Pp3c1_33320V3.1,Pp3c1_33320V3.2				no
Pp3c1_sORF2334	Chr01:23545212-23545272	95.8	lncRNA	Pp3c1_33330V3.1,Pp3c1_33330V3.2 | lncRNAs: lcl|Ppatens_Pp3c1_33330V3.1,lcl|Ppatens_Pp3c1_33330V3.2				no
Pp3c1_sORF2335	Chr01:23545593-23545677	94.4	lncRNA	Pp3c1_33330V3.1,Pp3c1_33330V3.2 | lncRNAs: lcl|Ppatens_Pp3c1_33330V3.1,lcl|Ppatens_Pp3c1_33330V3.2				no
Pp3c1_sORF2336	Chr01:23545809-23546112	45.1	lncRNA	Pp3c1_33330V3.2 | lncRNAs: lcl|Ppatens_Pp3c1_33330V3.2				no
Pp3c1_sORF2337	Chr01:23552571-23552805	42.2	five_prime_UTR	Pp3c1_33350V3.2,Pp3c1_33350V3.4,Pp3c1_33350V3.5,Pp3c1_33350V3.3,Pp3c1_33350V3.1				no
Pp3c1_sORF2338	Chr01:23553396-23553501	84.5	five_prime_UTR	Pp3c1_33350V3.2,Pp3c1_33350V3.4,Pp3c1_33350V3.5,Pp3c1_33350V3.3,Pp3c1_33350V3.1				no
Pp3c1_sORF2339	Chr01:23553801-23553864	91.8	five_prime_UTR	Pp3c1_33350V3.2,Pp3c1_33350V3.3			Excision,Stop codon excision	no
Pp3c1_sORF234	Chr01:11695855-11696002	64.7	three_prime_UTR	Pp3c1_15680V3.3,Pp3c1_15680V3.1,Pp3c1_15680V3.2	Ceratodon	Ceratodon:0.2746		no
Pp3c1_sORF2340	Chr01:23553882-23553966	91	five_prime_UTR	Pp3c1_33350V3.2,Pp3c1_33350V3.3			Excision	no
Pp3c1_sORF2341	Chr01:23588361-23588424	89.2	CDS	Pp3c1_33440V3.1,Pp3c1_33440V3.2,Pp3c1_33440V3.4,Pp3c1_33440V3.3				no
Pp3c1_sORF2342	Chr01:23588702-23588756	92.8	CDS	Pp3c1_33440V3.1,Pp3c1_33440V3.2,Pp3c1_33440V3.4,Pp3c1_33440V3.3				no
Pp3c1_sORF2343	Chr01:23588756-23588873	99.5	CDS	Pp3c1_33440V3.1,Pp3c1_33440V3.2,Pp3c1_33440V3.4,Pp3c1_33440V3.3				no
Pp3c1_sORF2344	Chr01:23589050-23589083	99.2	CDS	Pp3c1_33440V3.1,Pp3c1_33440V3.2,Pp3c1_33440V3.4,Pp3c1_33440V3.3				no
Pp3c1_sORF2345	Chr01:23550916-23551030	99.5	CDS	Pp3c1_33340V3.1,Pp3c1_33340V3.3,Pp3c1_33340V3.2,Pp3c1_33340V3.5,Pp3c1_33340V3.4				no
Pp3c1_sORF2346	Chr01:23551198-23551351	99.9	CDS	Pp3c1_33340V3.1,Pp3c1_33340V3.4,Pp3c1_33340V3.3,Pp3c1_33340V3.2			Start codon excision	no
Pp3c1_sORF2347	Chr01:23552632-23552680	89.6	five_prime_UTR,CDS	Pp3c1_33340V3.1,Pp3c1_33340V3.4,Pp3c1_33340V3.5,Pp3c1_33340V3.2			Excision	no
Pp3c1_sORF2348	Chr01:23553869-23553902	97.4	five_prime_UTR	Pp3c1_33340V3.1,Pp3c1_33340V3.3,Pp3c1_33340V3.2,Pp3c1_33340V3.5,Pp3c1_33340V3.4				no
Pp3c1_sORF2349	Chr01:23561709-23561763	93.5	CDS	Pp3c1_33360V3.1,Pp3c1_33360V3.5,Pp3c1_33360V3.3,Pp3c1_33360V3.7,Pp3c1_33360V3.6,Pp3c1_33360V3.8,Pp3c1_33360V3.9,Pp3c1_33360V3.2,Pp3c1_33360V3.4				no
Pp3c1_sORF235	Chr01:11696447-11696525	97.9	three_prime_UTR	Pp3c1_15680V3.3				no
Pp3c1_sORF2350	Chr01:23562125-23562158	100	five_prime_UTR	Pp3c1_33360V3.9			Excision	no
Pp3c1_sORF2351	Chr01:23564116-23564164	94.9	CDS	Pp3c1_33380V3.3,Pp3c1_33380V3.4,Pp3c1_33380V3.1,Pp3c1_33380V3.5,Pp3c1_33380V3.2				no
Pp3c1_sORF2352	Chr01:23564123-23564261	58.1	CDS	Pp3c1_33380V3.3,Pp3c1_33380V3.4,Pp3c1_33380V3.1,Pp3c1_33380V3.5,Pp3c1_33380V3.2				no
Pp3c1_sORF2353	Chr01:23564312-23564414	94.3	CDS	Pp3c1_33380V3.3,Pp3c1_33380V3.4,Pp3c1_33380V3.1,Pp3c1_33380V3.5,Pp3c1_33380V3.2				no
Pp3c1_sORF2354	Chr01:23565308-23565410	76	CDS	Pp3c1_33380V3.3,Pp3c1_33380V3.4,Pp3c1_33380V3.1,Pp3c1_33380V3.5,Pp3c1_33380V3.2				no
Pp3c1_sORF2355	Chr01:23611607-23611769	81.6	five_prime_UTR	Pp3c1_33480V3.3,Pp3c1_33480V3.1			Stop codon excision	no
Pp3c1_sORF2356	Chr01:23569026-23569116	88.2	five_prime_UTR	Pp3c1_33380V3.1,Pp3c1_33380V3.3,Pp3c1_33380V3.4,Pp3c1_33380V3.2			Excision	no
Pp3c1_sORF2357	Chr01:23613174-23613303	100	CDS	Pp3c1_33480V3.3,Pp3c1_33480V3.2,Pp3c1_33480V3.1				no
Pp3c1_sORF2358	Chr01:23616124-23616265	83.7	Interlaced	Pp3c1_33480V3.3,Pp3c1_33480V3.2,Pp3c1_33480V3.1				no
Pp3c1_sORF2359	Chr01:23574588-23574621	98.8	CDS	Pp3c1_33410V3.7				no
Pp3c1_sORF236	Chr01:11696705-11696876	52.6	three_prime_UTR	Pp3c1_15680V3.3				no
Pp3c1_sORF2360	Chr01:23620082-23620370	42880	five_prime_UTR	Pp3c1_33500V3.5,Pp3c1_33500V3.3,Pp3c1_33500V3.6			Start codon excision	no
Pp3c1_sORF2361	Chr01:23620266-23620401	77.2	five_prime_UTR	Pp3c1_33500V3.1,Pp3c1_33500V3.3,Pp3c1_33500V3.6,Pp3c1_33500V3.4,Pp3c1_33500V3.2,Pp3c1_33500V3.5				no
Pp3c1_sORF2362	Chr01:23577492-23577660	59.1	five_prime_UTR	Pp3c1_33410V3.7			Stop codon excision	no
Pp3c1_sORF2363	Chr01:23621597-23621768	95.4	CDS	Pp3c1_33500V3.1,Pp3c1_33500V3.3,Pp3c1_33500V3.6,Pp3c1_33500V3.4,Pp3c1_33500V3.2			Stop codon excision	no
Pp3c1_sORF2364	Chr01:23622164-23622314	100	CDS	Pp3c1_33500V3.1,Pp3c1_33500V3.3,Pp3c1_33500V3.6,Pp3c1_33500V3.4,Pp3c1_33500V3.2,Pp3c1_33500V3.5				no
Pp3c1_sORF2365	Chr01:23584099-23584132	100	CDS	Pp3c1_33430V3.1,Pp3c1_33430V3.2				no
Pp3c1_sORF2366	Chr01:23584702-23584744	95.8	CDS	Pp3c1_33430V3.1,Pp3c1_33430V3.2				no
Pp3c1_sORF2367	Chr01:23631052-23631229	50.3	five_prime_UTR	Pp3c1_33530V3.2				no
Pp3c1_sORF2368	Chr01:23631429-23631504	95.7	five_prime_UTR	Pp3c1_33530V3.3,Pp3c1_33530V3.2,Pp3c1_33530V3.4,Pp3c1_33530V3.5,Pp3c1_33530V3.1				no
Pp3c1_sORF2369	Chr01:23632449-23632527	99.9	CDS	Pp3c1_33530V3.3,Pp3c1_33530V3.2,Pp3c1_33530V3.4,Pp3c1_33530V3.5,Pp3c1_33530V3.1				no
Pp3c1_sORF237	Chr01:11568669-11568720	95.2	CDS	Pp3c1_15500V3.5,Pp3c1_15500V3.2,Pp3c1_15500V3.4,Pp3c1_15500V3.1,Pp3c1_15500V3.3,Pp3c1_15500V3.6				no
Pp3c1_sORF2370	Chr01:23632722-23632767	91.1	CDS	Pp3c1_33530V3.3,Pp3c1_33530V3.2,Pp3c1_33530V3.4,Pp3c1_33530V3.5,Pp3c1_33530V3.1				no
Pp3c1_sORF2371	Chr01:23633858-23634017	98.1	CDS	Pp3c1_33530V3.3,Pp3c1_33530V3.2,Pp3c1_33530V3.4,Pp3c1_33530V3.5,Pp3c1_33530V3.1				no
Pp3c1_sORF2372	Chr01:23635089-23635224	92.3	CDS	Pp3c1_33530V3.3,Pp3c1_33530V3.2,Pp3c1_33530V3.4,Pp3c1_33530V3.5,Pp3c1_33530V3.1	Ceratodon	Ceratodon:0.5419		no
Pp3c1_sORF2373	Chr01:23635920-23636028	80.7	three_prime_UTR	Pp3c1_33530V3.5	Ceratodon	Ceratodon:0.0607	Start codon excision	no
Pp3c1_sORF2374	Chr01:23596944-23597037	99.8	lncRNA	Pp3c1_33450V3.1,Pp3c1_33450V3.2,Pp3c1_33450V3.3 | lncRNAs: lcl|Ppatens_Pp3c1_33450V3.2,lcl|Ppatens_Pp3c1_33450V3.3				no
Pp3c1_sORF2375	Chr01:23602188-23602332	92.6	CDS	Pp3c1_33460V3.3,Pp3c1_33460V3.2,Pp3c1_33460V3.1				no
Pp3c1_sORF2376	Chr01:23604460-23604556	81.7	three_prime_UTR	Pp3c1_33460V3.3				no
Pp3c1_sORF2377	Chr01:23605060-23605222	71	three_prime_UTR	Pp3c1_33470V3.12				no
Pp3c1_sORF2378	Chr01:23605526-23605586	91.8	three_prime_UTR	Pp3c1_33470V3.12			Excision	no
Pp3c1_sORF2379	Chr01:23607437-23607554	79.9	CDS	Pp3c1_33470V3.22	Ceratodon	Ceratodon:4.2357		no
Pp3c1_sORF238	Chr01:11569082-11569184	89.4	CDS	Pp3c1_15500V3.5,Pp3c1_15500V3.2,Pp3c1_15500V3.4,Pp3c1_15500V3.1,Pp3c1_15500V3.3,Pp3c1_15500V3.6				no
Pp3c1_sORF2380	Chr01:23611054-23611303	68.3	five_prime_UTR	Pp3c1_33470V3.22			Stop codon excision	no
Pp3c1_sORF2381	Chr01:23611302-23611344	95.6	five_prime_UTR	Pp3c1_33470V3.7				no
Pp3c1_sORF2382	Chr01:23611628-23611661	96.7	five_prime_UTR	Pp3c1_33480V3.3				no
Pp3c1_sORF2383	Chr01:23627403-23627511	89.8	lncRNA	Pp3c1_33518V3.1 | lncRNAs: lcl|Ppatens_Pp3c1_33518V3.1				no
Pp3c1_sORF2384	Chr01:23628260-23628323	99.9	lncRNA	Pp3c1_33518V3.1 | lncRNAs: lcl|Ppatens_Pp3c1_33518V3.1				no
Pp3c1_sORF2385	Chr01:23653845-23653977	82.4	CDS	Pp3c1_33540V3.1,Pp3c1_33540V3.2	Ceratodon	Ceratodon:0.64		no
Pp3c1_sORF2386	Chr01:23681640-23681811	76.8	lncRNA	Pp3c1_33590V3.1 | lncRNAs: lcl|Ppatens_Pp3c1_33590V3.1				no
Pp3c1_sORF2387	Chr01:23684799-23685051	77.8	CDS	Pp3c1_33600V3.1,Pp3c1_33600V3.2				no
Pp3c1_sORF2388	Chr01:23729328-23729403	88.2	CDS	Pp3c1_33670V3.3,Pp3c1_33670V3.1,Pp3c1_33670V3.2				no
Pp3c1_sORF2389	Chr01:23773123-23773381	42875	five_prime_UTR	Pp3c1_33710V3.2				no
Pp3c1_sORF239	Chr01:11569393-11569540	86.8	CDS	Pp3c1_15500V3.5,Pp3c1_15500V3.2,Pp3c1_15500V3.4,Pp3c1_15500V3.1,Pp3c1_15500V3.3,Pp3c1_15500V3.6				no
Pp3c1_sORF2390	Chr01:23773698-23773803	92.2	CDS	Pp3c1_33710V3.2,Pp3c1_33710V3.1				no
Pp3c1_sORF2391	Chr01:23790570-23790723	96	five_prime_UTR	Pp3c1_33770V3.8,Pp3c1_33770V3.11,Pp3c1_33770V3.7			Excision,Stop codon excision	no
Pp3c1_sORF2392	Chr01:23791418-23791559	84.7	Interlaced	Pp3c1_33770V3.1,Pp3c1_33770V3.3,Pp3c1_33770V3.5,Pp3c1_33770V3.6,Pp3c1_33770V3.7,Pp3c1_33770V3.12,Pp3c1_33770V3.2,Pp3c1_33770V3.4,Pp3c1_33770V3.8			Excision	no
Pp3c1_sORF2393	Chr01:23791777-23791951	99.4	CDS	Pp3c1_33770V3.1,Pp3c1_33770V3.3,Pp3c1_33770V3.5,Pp3c1_33770V3.11,Pp3c1_33770V3.6,Pp3c1_33770V3.7,Pp3c1_33770V3.10,Pp3c1_33770V3.12,Pp3c1_33770V3.2,Pp3c1_33770V3.4,Pp3c1_33770V3.9,Pp3c1_33770V3.8				no
Pp3c1_sORF2394	Chr01:23792035-23792206	81.2	CDS	Pp3c1_33770V3.1,Pp3c1_33770V3.3,Pp3c1_33770V3.5,Pp3c1_33770V3.11,Pp3c1_33770V3.6,Pp3c1_33770V3.7,Pp3c1_33770V3.10,Pp3c1_33770V3.12,Pp3c1_33770V3.2,Pp3c1_33770V3.4,Pp3c1_33770V3.9,Pp3c1_33770V3.8				no
Pp3c1_sORF2395	Chr01:23793897-23794020	100	CDS	Pp3c1_33770V3.1,Pp3c1_33770V3.3,Pp3c1_33770V3.5,Pp3c1_33770V3.11,Pp3c1_33770V3.6,Pp3c1_33770V3.7,Pp3c1_33770V3.10,Pp3c1_33770V3.12,Pp3c1_33770V3.2,Pp3c1_33770V3.4,Pp3c1_33770V3.9,Pp3c1_33770V3.8	Ceratodon	Ceratodon:2.4456		no
Pp3c1_sORF2396	Chr01:23796989-23797190	96.8	CDS	Pp3c1_33770V3.1,Pp3c1_33770V3.3,Pp3c1_33770V3.5,Pp3c1_33770V3.11,Pp3c1_33770V3.6,Pp3c1_33770V3.7,Pp3c1_33770V3.10,Pp3c1_33770V3.12,Pp3c1_33770V3.2,Pp3c1_33770V3.4,Pp3c1_33770V3.9,Pp3c1_33770V3.8				no
Pp3c1_sORF2397	Chr01:23799332-23799365	94	CDS	Pp3c1_33770V3.1,Pp3c1_33770V3.3,Pp3c1_33770V3.5,Pp3c1_33770V3.11,Pp3c1_33770V3.6,Pp3c1_33770V3.7,Pp3c1_33770V3.10,Pp3c1_33770V3.12,Pp3c1_33770V3.2,Pp3c1_33770V3.4,Pp3c1_33770V3.9,Pp3c1_33770V3.8				no
Pp3c1_sORF2398	Chr01:23800094-23800169	88.7	CDS	Pp3c1_33770V3.1,Pp3c1_33770V3.3,Pp3c1_33770V3.5,Pp3c1_33770V3.11,Pp3c1_33770V3.6,Pp3c1_33770V3.7,Pp3c1_33770V3.10,Pp3c1_33770V3.12,Pp3c1_33770V3.2,Pp3c1_33770V3.4,Pp3c1_33770V3.9,Pp3c1_33770V3.8				no
Pp3c1_sORF2399	Chr01:23814734-23814803	89.5	five_prime_UTR	Pp3c1_33830V3.1				no
Pp3c1_sORF24	Chr01:10150597-10150684	90.1	CDS	Pp3c1_13910V3.2,Pp3c1_13910V3.1				no
Pp3c1_sORF240	Chr01:11569582-11569699	77	CDS	Pp3c1_15500V3.5,Pp3c1_15500V3.2,Pp3c1_15500V3.4,Pp3c1_15500V3.1,Pp3c1_15500V3.3,Pp3c1_15500V3.6	Ceratodon	Ceratodon:0.9221		no
Pp3c1_sORF2400	Chr01:23816016-23816094	81.4	CDS	Pp3c1_33830V3.1,Pp3c1_33830V3.4,Pp3c1_33830V3.3,Pp3c1_33830V3.5,Pp3c1_33830V3.2				no
Pp3c1_sORF2401	Chr01:23816684-23816732	94.1	CDS	Pp3c1_33830V3.1,Pp3c1_33830V3.4,Pp3c1_33830V3.3,Pp3c1_33830V3.5,Pp3c1_33830V3.2				no
Pp3c1_sORF2402	Chr01:23818023-23818071	98.1	CDS	Pp3c1_33830V3.1,Pp3c1_33830V3.4,Pp3c1_33830V3.3,Pp3c1_33830V3.5,Pp3c1_33830V3.2				no
Pp3c1_sORF2403	Chr01:23778542-23778575	97.6	three_prime_UTR	Pp3c1_33730V3.1				no
Pp3c1_sORF2404	Chr01:23781819-23782014	73.1	five_prime_UTR	Pp3c1_33730V3.1				no
Pp3c1_sORF2405	Chr01:23833590-23833719	92.2	Intergenic	ID=XLOC_017837|TCONS_00030434				no
Pp3c1_sORF2406	Chr01:23835911-23835968	99.6	CDS	Pp3c1_33890V3.1				no
Pp3c1_sORF2407	Chr01:23835977-23836106	80.5	CDS	Pp3c1_33890V3.1				no
Pp3c1_sORF2408	Chr01:23836115-23836379	96.4	CDS	Pp3c1_33890V3.1				no
Pp3c1_sORF2409	Chr01:23837791-23837965	75	CDS	Pp3c1_33890V3.1,Pp3c1_33890V3.3,Pp3c1_33890V3.2				no
Pp3c1_sORF241	Chr01:11570419-11570542	90.8	five_prime_UTR	Pp3c1_15500V3.5,Pp3c1_15500V3.6,Pp3c1_15500V3.4				no
Pp3c1_sORF2410	Chr01:23803955-23804078	88.9	three_prime_UTR	Pp3c1_33770V3.11				no
Pp3c1_sORF2411	Chr01:23804078-23804366	100	Interlaced	Pp3c1_33790V3.3	Ceratodon,Morchantia,Oryza,Sphagnum	Ceratodon:4.9037,Morchantia:1.5666,Sphagnum:3.1123,Oryza:2.1882		no
Pp3c1_sORF2412	Chr01:23804639-23804681	99.9	CDS	Pp3c1_33790V3.3				no
Pp3c1_sORF2413	Chr01:23806436-23806496	99.9	CDS	Pp3c1_33790V3.3				no
Pp3c1_sORF2414	Chr01:23878752-23878854	77.6	Intergenic	ID=XLOC_017834|TCONS_00030429				no
Pp3c1_sORF2415	Chr01:23847266-23847503	61.6	three_prime_UTR	Pp3c1_33890V3.3			Start codon excision	no
Pp3c1_sORF2416	Chr01:23848150-23848354	48.1	Interlaced	Pp3c1_33900V3.13	Ceratodon	Ceratodon:1.3717		no
Pp3c1_sORF2417	Chr01:23848894-23848936	97.8	CDS	Pp3c1_33900V3.13				no
Pp3c1_sORF2418	Chr01:23849247-23849328	90.7	CDS	Pp3c1_33900V3.13				no
Pp3c1_sORF2419	Chr01:23851675-23851750	91.3	CDS	Pp3c1_33900V3.13				no
Pp3c1_sORF242	Chr01:11804989-11805022	98.7	five_prime_UTR	Pp3c1_15730V3.1,Pp3c1_15730V3.2				no
Pp3c1_sORF2420	Chr01:23853165-23853216	97.5	CDS	Pp3c1_33900V3.13				no
Pp3c1_sORF2421	Chr01:23853783-23853867	82	CDS	Pp3c1_33900V3.13				no
Pp3c1_sORF2422	Chr01:23854032-23854272	82.5	CDS	Pp3c1_33900V3.13				no
Pp3c1_sORF2423	Chr01:23854344-23854437	85.6	five_prime_UTR	Pp3c1_33900V3.13	Ceratodon,Sphagnum	Ceratodon:0.087,Sphagnum:0.2039		no
Pp3c1_sORF2424	Chr01:23855216-23855339	76.6	lncRNA	Pp3c1_33900V3.11,Pp3c1_33900V3.12 | lncRNAs: TCONS_00033995_100,TCONS_00033996_100,TCONS_00033997_100			Excision	no
Pp3c1_sORF2425	Chr01:23900352-23900478	98.1	lncRNA	Pp3c1_33980V3.1 | lncRNAs: lcl|Ppatens_Pp3c1_33980V3.1				no
Pp3c1_sORF2426	Chr01:23900360-23900651	38.4	lncRNA	Pp3c1_33980V3.1 | lncRNAs: lcl|Ppatens_Pp3c1_33980V3.1				no
Pp3c1_sORF2427	Chr01:23901247-23901280	100	lncRNA	Pp3c1_33980V3.1,Pp3c1_33980V3.2 | lncRNAs: lcl|Ppatens_Pp3c1_33980V3.1,lcl|Ppatens_Pp3c1_33980V3.2				no
Pp3c1_sORF2428	Chr01:23942683-23942800	78.8	CDS	Pp3c1_34000V3.3,Pp3c1_34000V3.6,Pp3c1_34000V3.7,Pp3c1_34000V3.1,Pp3c1_34000V3.5,Pp3c1_34000V3.4,Pp3c1_34000V3.8,Pp3c1_34000V3.2				no
Pp3c1_sORF2429	Chr01:23943034-23943157	94.2	CDS	Pp3c1_34000V3.3,Pp3c1_34000V3.6,Pp3c1_34000V3.7,Pp3c1_34000V3.1,Pp3c1_34000V3.5,Pp3c1_34000V3.4,Pp3c1_34000V3.8,Pp3c1_34000V3.2				no
Pp3c1_sORF243	Chr01:11805079-11805145	91.6	five_prime_UTR	Pp3c1_15730V3.1,Pp3c1_15730V3.2				no
Pp3c1_sORF2430	Chr01:23943442-23943478	100	CDS	Pp3c1_34000V3.3,Pp3c1_34000V3.6,Pp3c1_34000V3.7,Pp3c1_34000V3.1,Pp3c1_34000V3.5,Pp3c1_34000V3.4,Pp3c1_34000V3.8,Pp3c1_34000V3.2				no
Pp3c1_sORF2431	Chr01:23943613-23943739	99.5	CDS	Pp3c1_34000V3.3,Pp3c1_34000V3.6,Pp3c1_34000V3.7,Pp3c1_34000V3.1,Pp3c1_34000V3.5,Pp3c1_34000V3.4,Pp3c1_34000V3.8,Pp3c1_34000V3.2				no
Pp3c1_sORF2432	Chr01:23946239-23946380	79.2	five_prime_UTR	Pp3c1_34020V3.2				no
Pp3c1_sORF2433	Chr01:23969915-23970008	83.7	lncRNA	Pp3c1_34050V3.1,Pp3c1_34050V3.3 | lncRNAs: lcl|Ppatens_Pp3c1_34050V3.1,lcl|Ppatens_Pp3c1_34050V3.3			Excision	no
Pp3c1_sORF2434	Chr01:23970676-23970832	99.4	lncRNA	Pp3c1_34050V3.2,Pp3c1_34050V3.1,Pp3c1_34050V3.3 | lncRNAs: lcl|Ppatens_Pp3c1_34050V3.1,lcl|Ppatens_Pp3c1_34050V3.2,lcl|Ppatens_Pp3c1_34050V3.3				no
Pp3c1_sORF2435	Chr01:23974232-23974406	100	CDS	Pp3c1_34070V3.2,Pp3c1_34070V3.1				no
Pp3c1_sORF2436	Chr01:23974904-23974964	100	CDS	Pp3c1_34070V3.2,Pp3c1_34070V3.1				no
Pp3c1_sORF2437	Chr01:23986962-23987124	74.1	five_prime_UTR	Pp3c1_34140V3.1,Pp3c1_34140V3.2				no
Pp3c1_sORF2438	Chr01:23989358-23989427	100	CDS	Pp3c1_34140V3.1,Pp3c1_34140V3.2				no
Pp3c1_sORF2439	Chr01:23990411-23990495	99.8	CDS	Pp3c1_34140V3.1,Pp3c1_34140V3.2				no
Pp3c1_sORF244	Chr01:11807805-11807901	75.4	CDS	Pp3c1_15730V3.1,Pp3c1_15730V3.2				no
Pp3c1_sORF2440	Chr01:24007418-24007526	94.1	Interlaced	Pp3c1_34190V3.4,Pp3c1_34190V3.3,Pp3c1_34190V3.1,Pp3c1_34190V3.5,Pp3c1_34190V3.2				no
Pp3c1_sORF2441	Chr01:24007589-24007718	98.6	CDS	Pp3c1_34190V3.4,Pp3c1_34190V3.3,Pp3c1_34190V3.1,Pp3c1_34190V3.5,Pp3c1_34190V3.2				no
Pp3c1_sORF2442	Chr01:24007730-24007841	95.2	CDS	Pp3c1_34190V3.4,Pp3c1_34190V3.3,Pp3c1_34190V3.1,Pp3c1_34190V3.5,Pp3c1_34190V3.2	Ceratodon	Ceratodon:1.3509		no
Pp3c1_sORF2443	Chr01:24008218-24008383	96.8	CDS	Pp3c1_34190V3.4,Pp3c1_34190V3.3,Pp3c1_34190V3.1,Pp3c1_34190V3.5,Pp3c1_34190V3.2	Ceratodon	Ceratodon:1.3748		no
Pp3c1_sORF2444	Chr01:24008656-24008719	90.1	CDS	Pp3c1_34190V3.4,Pp3c1_34190V3.3,Pp3c1_34190V3.1,Pp3c1_34190V3.5,Pp3c1_34190V3.2				no
Pp3c1_sORF2445	Chr01:24008791-24008896	99.2	CDS	Pp3c1_34190V3.4,Pp3c1_34190V3.3,Pp3c1_34190V3.1,Pp3c1_34190V3.5,Pp3c1_34190V3.2				no
Pp3c1_sORF2446	Chr01:24009990-24010068	92.7	CDS	Pp3c1_34190V3.4,Pp3c1_34190V3.3,Pp3c1_34190V3.1,Pp3c1_34190V3.5,Pp3c1_34190V3.2				no
Pp3c1_sORF2447	Chr01:24010500-24010560	100	CDS	Pp3c1_34190V3.4,Pp3c1_34190V3.3,Pp3c1_34190V3.1,Pp3c1_34190V3.5,Pp3c1_34190V3.2				no
Pp3c1_sORF2448	Chr01:23984915-23984984	100	CDS	Pp3c1_34110V3.1				no
Pp3c1_sORF2449	Chr01:23985323-23985371	93.8	CDS	Pp3c1_34110V3.1,Pp3c1_34100V3.2				no
Pp3c1_sORF245	Chr01:11808674-11808743	100	CDS	Pp3c1_15730V3.1,Pp3c1_15730V3.2				no
Pp3c1_sORF2450	Chr01:23986607-23986754	82.2	five_prime_UTR,CDS	Pp3c1_34110V3.1				no
Pp3c1_sORF2451	Chr01:23986930-23987014	91.8	five_prime_UTR	Pp3c1_34110V3.1				no
Pp3c1_sORF2452	Chr01:23987325-23987574	68.9	five_prime_UTR	Pp3c1_34140V3.2	Ceratodon	Ceratodon:0.1327		no
Pp3c1_sORF2453	Chr01:23987631-23987847	100	five_prime_UTR	Pp3c1_34140V3.2	Ceratodon,Sphagnum	Ceratodon:0.3413,Sphagnum:0.26		no
Pp3c1_sORF2454	Chr01:23987876-23988014	59.5	five_prime_UTR	Pp3c1_34110V3.1				no
Pp3c1_sORF2455	Chr01:23988214-23988328	99.5	five_prime_UTR	Pp3c1_34110V3.1	Arabidopsis,Ceratodon,Morchantia,Oryza,Selaginella,Sphagnum,Spirodela,Zea	Ceratodon:0.27,Morchantia:0.1912,Sphagnum:0.0917,Oryza:0.1987,Arabidopsis:0.1237,Zea:0.1967,Spirodela:0.1019,Selaginella:0.235		no
Pp3c1_sORF2456	Chr01:23988583-23988676	97.1	five_prime_UTR	Pp3c1_34110V3.1				no
Pp3c1_sORF2457	Chr01:23989301-23989382	99.4	five_prime_UTR	Pp3c1_34140V3.2				no
Pp3c1_sORF2458	Chr01:23989416-23989593	99.4	five_prime_UTR	Pp3c1_34140V3.2	Arabidopsis,Ceratodon,Morchantia,Oryza,Selaginella,Sphagnum,Spirodela,Zea	Ceratodon:0.1047,Morchantia:0.1488,Sphagnum:0.197,Oryza:0.1487,Arabidopsis:0.1401,Zea:0.1356,Spirodela:0.2022,Selaginella:0.3522		no
Pp3c1_sORF2459	Chr01:23990376-23990625	96.7	five_prime_UTR	Pp3c1_34110V3.1	Arabidopsis,Ceratodon,Morchantia,Oryza,Selaginella,Sphagnum,Spirodela,Volvox,Zea	Ceratodon:0.0747,Morchantia:0.1935,Sphagnum:0.147,Oryza:0.2163,Arabidopsis:0.2592,Volvox:0.2167,Zea:0.343,Spirodela:0.2477,Selaginella:0.3106		no
Pp3c1_sORF246	Chr01:11808836-11808884	94.1	CDS	Pp3c1_15730V3.1,Pp3c1_15730V3.2				no
Pp3c1_sORF2460	Chr01:23998081-23998114	100	CDS	Pp3c1_34170V3.1,Pp3c1_34170V3.2				no
Pp3c1_sORF2461	Chr01:24057574-24057661	99.4	CDS	Pp3c1_34240V3.1,Pp3c1_34240V3.2	Ceratodon	Ceratodon:1.9019		no
Pp3c1_sORF2462	Chr01:24029958-24030096	81.8	five_prime_UTR	Pp3c1_34210V3.1				no
Pp3c1_sORF2463	Chr01:24105814-24105946	80.3	five_prime_UTR	Pp3c1_34260V3.1,Pp3c1_34260V3.2				no
Pp3c1_sORF2464	Chr01:24105974-24106040	99.7	CDS	Pp3c1_34260V3.1,Pp3c1_34260V3.2				no
Pp3c1_sORF2465	Chr01:24106283-24106448	100	CDS	Pp3c1_34260V3.1,Pp3c1_34260V3.2	Ceratodon	Ceratodon:4.8495		no
Pp3c1_sORF2466	Chr01:24106616-24106649	98.8	CDS	Pp3c1_34260V3.1,Pp3c1_34260V3.2				no
Pp3c1_sORF2467	Chr01:24106736-24106802	99.2	CDS	Pp3c1_34260V3.1,Pp3c1_34260V3.2				no
Pp3c1_sORF2468	Chr01:24107198-24107234	100	CDS	Pp3c1_34260V3.1,Pp3c1_34260V3.2				no
Pp3c1_sORF2469	Chr01:24108538-24108790	35.9	three_prime_UTR	Pp3c1_34260V3.1				no
Pp3c1_sORF247	Chr01:11829174-11829315	84.5	five_prime_UTR	Pp3c1_15780V3.2,Pp3c1_15780V3.5,Pp3c1_15780V3.1,Pp3c1_15780V3.4,Pp3c1_15780V3.7,Pp3c1_15780V3.3				no
Pp3c1_sORF2470	Chr01:24149918-24149984	99.2	lncRNA	Pp3c1_34380V3.2,Pp3c1_34380V3.1 | lncRNAs: lcl|Ppatens_Pp3c1_34380V3.1,lcl|Ppatens_Pp3c1_34380V3.2				no
Pp3c1_sORF2471	Chr01:24150290-24150368	88.2	lncRNA	Pp3c1_34380V3.2,Pp3c1_34380V3.1 | lncRNAs: lcl|Ppatens_Pp3c1_34380V3.1,lcl|Ppatens_Pp3c1_34380V3.2				no
Pp3c1_sORF2472	Chr01:24113263-24113299	94.8	CDS	Pp3c1_34301V3.1				no
Pp3c1_sORF2473	Chr01:24157913-24157997	84.7	three_prime_UTR	Pp3c1_34400V3.2,Pp3c1_34400V3.1				no
Pp3c1_sORF2474	Chr01:24158824-24158917	97.1	three_prime_UTR	Pp3c1_34400V3.1				no
Pp3c1_sORF2475	Chr01:24159394-24159670	42811	three_prime_UTR	Pp3c1_34400V3.1	Ceratodon,Morchantia,Selaginella,Sphagnum	Ceratodon:0.1123,Morchantia:0.1964,Sphagnum:0.2521,Selaginella:0.2325		no
Pp3c1_sORF2476	Chr01:24119075-24119111	99.8	Interlaced	Pp3c1_34310V3.1,Pp3c1_34310V3.2,Pp3c1_34310V3.4,Pp3c1_34310V3.3				no
Pp3c1_sORF2477	Chr01:24151079-24151139	92.9	three_prime_UTR	Pp3c1_34390V3.2,Pp3c1_34390V3.1				no
Pp3c1_sORF2478	Chr01:24151305-24151428	100	Interlaced	Pp3c1_34390V3.2,Pp3c1_34390V3.1				no
Pp3c1_sORF2479	Chr01:24195337-24195478	59.3	lncRNA	Pp3c1_34522V3.1 | lncRNAs: lcl|Ppatens_Pp3c1_34522V3.1				no
Pp3c1_sORF248	Chr01:11831665-11831755	83.3	CDS	Pp3c1_15780V3.7,Pp3c1_15780V3.6				no
Pp3c1_sORF2480	Chr01:2420086-2420218	73.2	five_prime_UTR	Pp3c1_3000V3.2				no
Pp3c1_sORF2481	Chr01:24158659-24158788	87.3	Interlaced	Pp3c1_34410V3.5,Pp3c1_34410V3.3,Pp3c1_34410V3.2,Pp3c1_34410V3.1,Pp3c1_34410V3.4				no
Pp3c1_sORF2482	Chr01:24159410-24159527	88.3	CDS	Pp3c1_34410V3.3,Pp3c1_34410V3.1,Pp3c1_34410V3.4,Pp3c1_34410V3.5			Excision	no
Pp3c1_sORF2483	Chr01:2422308-2422365	90.9	three_prime_UTR	Pp3c1_3000V3.1,Pp3c1_3000V3.2				no
Pp3c1_sORF2484	Chr01:24197894-24197996	99.3	three_prime_UTR	Pp3c1_34522V3.1				no
Pp3c1_sORF2485	Chr01:24200137-24200191	91.9	CDS	Pp3c1_34530V3.2,Pp3c1_34530V3.1				no
Pp3c1_sORF2486	Chr01:24200884-24200950	95.2	CDS	Pp3c1_34530V3.2,Pp3c1_34530V3.1				no
Pp3c1_sORF2487	Chr01:24201001-24201226	70.7	CDS	Pp3c1_34530V3.2,Pp3c1_34530V3.1				no
Pp3c1_sORF2488	Chr01:24220985-24221111	84.7	five_prime_UTR	Pp3c1_34560V3.4			Excision	no
Pp3c1_sORF2489	Chr01:24221139-24221226	91.3	five_prime_UTR	Pp3c1_34560V3.4			Excision	no
Pp3c1_sORF249	Chr01:11665844-11665967	84.7	Intergenic	ID=XLOC_030527|TCONS_00052323				no
Pp3c1_sORF2490	Chr01:24265063-24265180	88.2	CDS	Pp3c1_34660V3.1				no
Pp3c1_sORF2491	Chr01:24265270-24265327	96.9	CDS	Pp3c1_34660V3.1				no
Pp3c1_sORF2492	Chr01:24229345-24229378	94	CDS	Pp3c1_34580V3.2,Pp3c1_34580V3.1				no
Pp3c1_sORF2493	Chr01:24233640-24233811	93.2	CDS	Pp3c1_34590V3.1				no
Pp3c1_sORF2494	Chr01:24233883-24233985	93.7	CDS	Pp3c1_34590V3.1				no
Pp3c1_sORF2495	Chr01:24240357-24240408	96.1	CDS	Pp3c1_34600V3.2,Pp3c1_34600V3.1				no
Pp3c1_sORF2496	Chr01:24240567-24240687	80.7	CDS	Pp3c1_34600V3.2,Pp3c1_34600V3.1				no
Pp3c1_sORF2497	Chr01:24266718-24266883	78.3	Interlaced	Pp3c1_34670V3.2				no
Pp3c1_sORF2498	Chr01:24269930-24270116	92.1	CDS	Pp3c1_34680V3.1,Pp3c1_34680V3.2	Ceratodon,Sphagnum	Ceratodon:3.2487,Sphagnum:2.1297		no
Pp3c1_sORF2499	Chr01:24271900-24271999	85	CDS	Pp3c1_34680V3.1,Pp3c1_34680V3.2				no
Pp3c1_sORF25	Chr01:10150867-10150999	100	CDS	Pp3c1_13910V3.2,Pp3c1_13910V3.1				no
Pp3c1_sORF250	Chr01:11672276-11672402	74.7	three_prime_UTR	Pp3c1_15620V3.1				no
Pp3c1_sORF2500	Chr01:24272077-24272125	94.3	CDS	Pp3c1_34680V3.1,Pp3c1_34680V3.2				no
Pp3c1_sORF2501	Chr01:24272665-24272779	86	CDS	Pp3c1_34680V3.1,Pp3c1_34680V3.2				no
Pp3c1_sORF2502	Chr01:24275522-24275561	98.4	CDS	Pp3c1_34680V3.1,Pp3c1_34680V3.2				no
Pp3c1_sORF2503	Chr01:24283434-24283659	92.3	Intergenic	ID=XLOC_017708|TCONS_00030191				no
Pp3c1_sORF2504	Chr01:24464892-24465003	100	CDS	Pp3c1_34820V3.3,Pp3c1_34820V3.2,Pp3c1_34820V3.1				no
Pp3c1_sORF2505	Chr01:24465677-24465728	100	CDS	Pp3c1_34820V3.3,Pp3c1_34820V3.2,Pp3c1_34820V3.1				no
Pp3c1_sORF2506	Chr01:24469012-24469093	84.7	CDS	Pp3c1_34820V3.3,Pp3c1_34820V3.2,Pp3c1_34820V3.1				no
Pp3c1_sORF2507	Chr01:24471554-24471680	83.6	three_prime_UTR	Pp3c1_34820V3.3,Pp3c1_34820V3.2,Pp3c1_34820V3.1				no
Pp3c1_sORF2508	Chr01:24472229-24472511	34.9	five_prime_UTR	Pp3c1_34830V3.2,Pp3c1_34830V3.1				no
Pp3c1_sORF2509	Chr01:24473426-24473495	88.5	CDS	Pp3c1_34830V3.2,Pp3c1_34830V3.1				no
Pp3c1_sORF251	Chr01:11673084-11673261	65.2	three_prime_UTR	Pp3c1_15620V3.1				no
Pp3c1_sORF2510	Chr01:24474460-24474595	67.7	CDS	Pp3c1_34830V3.2,Pp3c1_34830V3.1				no
Pp3c1_sORF2511	Chr01:24474783-24475044	42753	three_prime_UTR	Pp3c1_34830V3.2,Pp3c1_34830V3.1				no
Pp3c1_sORF2512	Chr01:24483892-24483985	95.9	CDS	Pp3c1_34880V3.8,Pp3c1_34880V3.1,Pp3c1_34880V3.9,Pp3c1_34880V3.11,Pp3c1_34880V3.6,Pp3c1_34880V3.3,Pp3c1_34880V3.7,Pp3c1_34880V3.4,Pp3c1_34880V3.10,Pp3c1_34880V3.2	Ceratodon	Ceratodon:1.2071	Excision	no
Pp3c1_sORF2513	Chr01:24442325-24442370	97.9	three_prime_UTR	Pp3c1_34680V3.2				no
Pp3c1_sORF2514	Chr01:24442397-24442454	99.8	three_prime_UTR	Pp3c1_34800V3.3				no
Pp3c1_sORF2515	Chr01:24490582-24490660	83.5	CDS	Pp3c1_34890V3.1,Pp3c1_34890V3.2				no
Pp3c1_sORF2516	Chr01:24490846-24490972	92.5	CDS	Pp3c1_34890V3.1,Pp3c1_34890V3.2				no
Pp3c1_sORF2517	Chr01:24491305-24491386	99.1	CDS	Pp3c1_34890V3.1,Pp3c1_34890V3.2				no
Pp3c1_sORF2518	Chr01:24506483-24506555	96.2	CDS	Pp3c1_34910V3.1				no
Pp3c1_sORF2519	Chr01:24551580-24551664	88.1	three_prime_UTR,CDS	Pp3c1_34950V3.3,Pp3c1_34950V3.2,Pp3c1_34950V3.1,Pp3c1_34950V3.7,Pp3c1_34950V3.6,Pp3c1_34950V3.5,Pp3c1_34950V3.4				no
Pp3c1_sORF252	Chr01:11673368-11673446	98.4	three_prime_UTR	Pp3c1_15620V3.2,Pp3c1_15620V3.1				no
Pp3c1_sORF2520	Chr01:24551932-24552001	98.5	three_prime_UTR,CDS	Pp3c1_34950V3.3,Pp3c1_34950V3.2,Pp3c1_34950V3.1,Pp3c1_34950V3.7,Pp3c1_34950V3.6,Pp3c1_34950V3.5,Pp3c1_34950V3.4				no
Pp3c1_sORF2521	Chr01:24553489-24553627	99.2	CDS	Pp3c1_34950V3.3,Pp3c1_34950V3.2,Pp3c1_34950V3.1,Pp3c1_34950V3.7,Pp3c1_34950V3.6,Pp3c1_34950V3.5,Pp3c1_34950V3.4				no
Pp3c1_sORF2522	Chr01:24566457-24566703	42879	CDS	Pp3c1_35010V3.3,Pp3c1_35010V3.1,Pp3c1_35010V3.2	Ceratodon,Sphagnum	Ceratodon:2.962,Sphagnum:2.745		no
Pp3c1_sORF2523	Chr01:24567702-24567831	89.1	CDS	Pp3c1_35010V3.3,Pp3c1_35010V3.1,Pp3c1_35010V3.2				no
Pp3c1_sORF2524	Chr01:24568067-24568139	93.4	five_prime_UTR	Pp3c1_35010V3.3,Pp3c1_35010V3.1,Pp3c1_35010V3.2				no
Pp3c1_sORF2525	Chr01:24568977-24569094	76.8	five_prime_UTR	Pp3c1_35010V3.3,Pp3c1_35010V3.1,Pp3c1_35010V3.2				no
Pp3c1_sORF2526	Chr01:24658106-24658286	99	Intergenic	ID=XLOC_017810|TCONS_00030388				no
Pp3c1_sORF2527	Chr01:24660004-24660094	98.8	CDS	Pp3c1_35100V3.1,Pp3c1_35100V3.2				no
Pp3c1_sORF2528	Chr01:24660133-24660214	96.9	CDS	Pp3c1_35100V3.1,Pp3c1_35100V3.2				no
Pp3c1_sORF2529	Chr01:24660550-24660673	98	CDS	Pp3c1_35100V3.1,Pp3c1_35100V3.2				no
Pp3c1_sORF253	Chr01:11673839-11673926	99.9	Interlaced	Pp3c1_15620V3.1				no
Pp3c1_sORF2530	Chr01:24660859-24660964	97.5	CDS	Pp3c1_35100V3.1,Pp3c1_35100V3.2				no
Pp3c1_sORF2531	Chr01:24667482-24667785	48.4	five_prime_UTR	Pp3c1_35120V3.2,Pp3c1_35120V3.1				no
Pp3c1_sORF2532	Chr01:24667622-24667925	38.7	five_prime_UTR	Pp3c1_35120V3.2,Pp3c1_35120V3.1				no
Pp3c1_sORF2533	Chr01:24668138-24668174	95.1	CDS	Pp3c1_35120V3.2,Pp3c1_35120V3.1				no
Pp3c1_sORF2534	Chr01:24668846-24668969	100	CDS	Pp3c1_35120V3.2,Pp3c1_35120V3.1				no
Pp3c1_sORF2535	Chr01:24669579-24669723	97	CDS	Pp3c1_35120V3.2,Pp3c1_35120V3.1				no
Pp3c1_sORF2536	Chr01:24675756-24675819	93.9	CDS	Pp3c1_35131V3.1				no
Pp3c1_sORF2537	Chr01:24692854-24692914	95.7	five_prime_UTR	Pp3c1_35160V3.4			Stop codon excision	no
Pp3c1_sORF2538	Chr01:24694344-24694413	95.5	CDS	Pp3c1_35160V3.1,Pp3c1_35160V3.2,Pp3c1_35160V3.5			Stop codon excision	no
Pp3c1_sORF2539	Chr01:24699615-24699747	94.7	five_prime_UTR,CDS	Pp3c1_35170V3.5,Pp3c1_35170V3.3,Pp3c1_35170V3.4,Pp3c1_35170V3.1,Pp3c1_35170V3.2				no
Pp3c1_sORF254	Chr01:11859606-11859717	83.8	Intergenic	ID=XLOC_030497|TCONS_00052265				no
Pp3c1_sORF2540	Chr01:24704672-24704768	96.5	three_prime_UTR	Pp3c1_35170V3.5,Pp3c1_35170V3.3,Pp3c1_35170V3.4,Pp3c1_35170V3.1,Pp3c1_35170V3.2				no
Pp3c1_sORF2541	Chr01:24675469-24675649	53.7	three_prime_UTR	Pp3c1_35130V3.3			Excision	no
Pp3c1_sORF2542	Chr01:24677187-24677238	99.8	CDS	Pp3c1_35130V3.1,Pp3c1_35130V3.3,Pp3c1_35130V3.4,Pp3c1_35130V3.2				no
Pp3c1_sORF2543	Chr01:24716295-24716481	72.7	Interlaced	Pp3c1_35220V3.1,Pp3c1_35220V3.2				no
Pp3c1_sORF2544	Chr01:24716904-24717099	99.6	CDS	Pp3c1_35220V3.1,Pp3c1_35220V3.2	Ceratodon	Ceratodon:5.1724		no
Pp3c1_sORF2545	Chr01:24717198-24717318	97.6	Interlaced	Pp3c1_35220V3.1,Pp3c1_35220V3.2				no
Pp3c1_sORF2546	Chr01:24723522-24723564	97.9	lncRNA	Pp3c1_35228V3.1 | lncRNAs: lcl|Ppatens_Pp3c1_35228V3.1				no
Pp3c1_sORF2547	Chr01:24724613-24724667	92.6	lncRNA	Pp3c1_35228V3.1 | lncRNAs: lcl|Ppatens_Pp3c1_35228V3.1				no
Pp3c1_sORF2548	Chr01:24727251-24727380	82.2	lncRNA	Pp3c1_35228V3.1 | lncRNAs: lcl|Ppatens_Pp3c1_35228V3.1				no
Pp3c1_sORF2549	Chr01:24772389-24772461	89.6	CDS	Pp3c1_35360V3.2,Pp3c1_35360V3.1				no
Pp3c1_sORF255	Chr01:834037-834088	99.2	three_prime_UTR	Pp3c1_1260V3.2				no
Pp3c1_sORF2550	Chr01:24772488-24772707	96.4	CDS	Pp3c1_35360V3.2,Pp3c1_35360V3.1				no
Pp3c1_sORF2551	Chr01:24729598-24729667	95.2	CDS	Pp3c1_35260V3.1,Pp3c1_35260V3.2				no
Pp3c1_sORF2552	Chr01:24772791-24772992	50.9	Interlaced	Pp3c1_35360V3.2,Pp3c1_35360V3.1	Ceratodon	Ceratodon:1.9725		no
Pp3c1_sORF2553	Chr01:24729739-24729898	100	CDS	Pp3c1_35260V3.1,Pp3c1_35260V3.2	Ceratodon	Ceratodon:0.876		no
Pp3c1_sORF2554	Chr01:24773119-24773164	97.7	three_prime_UTR	Pp3c1_35360V3.2,Pp3c1_35360V3.1				no
Pp3c1_sORF2555	Chr01:24730348-24730474	64.9	CDS	Pp3c1_35260V3.1,Pp3c1_35260V3.2	Ceratodon	Ceratodon:1.0497		no
Pp3c1_sORF2556	Chr01:24773906-24774029	98.3	Interlaced	Pp3c1_35360V3.1				no
Pp3c1_sORF2557	Chr01:24735281-24735527	56.6	five_prime_UTR	Pp3c1_35260V3.1			Start codon excision	no
Pp3c1_sORF2558	Chr01:24753125-24753218	89	CDS	Pp3c1_35290V3.1				no
Pp3c1_sORF2559	Chr01:24753237-24753309	92.7	CDS	Pp3c1_35310V3.2				no
Pp3c1_sORF256	Chr01:838394-838478	99.8	five_prime_UTR	Pp3c1_1270V3.3				no
Pp3c1_sORF2560	Chr01:24753363-24753417	100	CDS	Pp3c1_35310V3.2				no
Pp3c1_sORF2561	Chr01:24753645-24753717	96.5	CDS	Pp3c1_35310V3.2				no
Pp3c1_sORF2562	Chr01:24753930-24754053	94.8	CDS	Pp3c1_35310V3.2				no
Pp3c1_sORF2563	Chr01:24754709-24754880	47.1	CDS	Pp3c1_35310V3.2				no
Pp3c1_sORF2564	Chr01:24762730-24762856	63.8	CDS	Pp3c1_35340V3.1				no
Pp3c1_sORF2565	Chr01:24763405-24763447	99.7	CDS	Pp3c1_35340V3.1				no
Pp3c1_sORF2566	Chr01:24768884-24768947	95.1	CDS	Pp3c1_35350V3.2,Pp3c1_35350V3.1				no
Pp3c1_sORF2567	Chr01:24770870-24771008	95.1	five_prime_UTR	Pp3c1_35350V3.2,Pp3c1_35350V3.1				no
Pp3c1_sORF2568	Chr01:24771038-24771113	100	five_prime_UTR	Pp3c1_35350V3.2,Pp3c1_35350V3.1				no
Pp3c1_sORF2569	Chr01:24777579-24777741	100	CDS	Pp3c1_35390V3.2,Pp3c1_35390V3.1,Pp3c1_35390V3.3				no
Pp3c1_sORF257	Chr01:11923383-11923665	99.9	CDS	Pp3c1_15890V3.1				no
Pp3c1_sORF2570	Chr01:24788717-24788855	83.8	three_prime_UTR	Pp3c1_35410V3.3,Pp3c1_35410V3.4			Start codon excision	no
Pp3c1_sORF2571	Chr01:24789417-24789573	79.7	Interlaced	Pp3c1_35410V3.4				no
Pp3c1_sORF2572	Chr01:24792276-24792369	86.2	five_prime_UTR	Pp3c1_35410V3.4				no
Pp3c1_sORF2573	Chr01:24792588-24792627	98.5	five_prime_UTR	Pp3c1_35410V3.1				no
Pp3c1_sORF2574	Chr01:24793038-24793071	98.6	five_prime_UTR	Pp3c1_35410V3.1				no
Pp3c1_sORF2575	Chr01:24815342-24815471	92.5	Intergenic	ID=XLOC_017685|TCONS_00030139				no
Pp3c1_sORF2576	Chr01:24820396-24820456	91.3	CDS	Pp3c1_35460V3.1				no
Pp3c1_sORF2577	Chr01:24821860-24822064	57.3	five_prime_UTR	Pp3c1_35460V3.2				no
Pp3c1_sORF2578	Chr01:24910283-24910361	100	CDS	Pp3c1_35560V3.1,Pp3c1_35560V3.2				no
Pp3c1_sORF2579	Chr01:24982709-24982766	95	lncRNA	Pp3c1_35640V3.1 | lncRNAs: lcl|Ppatens_Pp3c1_35640V3.1				no
Pp3c1_sORF258	Chr01:11923540-11923582	91	CDS	Pp3c1_15890V3.1				no
Pp3c1_sORF2580	Chr01:24965164-24965281	92.8	three_prime_UTR	Pp3c1_35610V3.2,Pp3c1_35610V3.3,Pp3c1_35610V3.1				no
Pp3c1_sORF2581	Chr01:24966688-24966766	100	CDS	Pp3c1_35610V3.2,Pp3c1_35610V3.3,Pp3c1_35610V3.1				no
Pp3c1_sORF2582	Chr01:24974784-24974943	50.3	three_prime_UTR	Pp3c1_35630V3.4,Pp3c1_35630V3.6,Pp3c1_35630V3.7,Pp3c1_35630V3.5				no
Pp3c1_sORF2583	Chr01:24976567-24976630	90.9	CDS	Pp3c1_35630V3.3,Pp3c1_35630V3.1,Pp3c1_35630V3.2,Pp3c1_35630V3.7,Pp3c1_35630V3.6,Pp3c1_35630V3.4,Pp3c1_35630V3.5				no
Pp3c1_sORF2584	Chr01:24976937-24977027	98.8	CDS	Pp3c1_35630V3.3,Pp3c1_35630V3.1,Pp3c1_35630V3.2,Pp3c1_35630V3.7,Pp3c1_35630V3.6,Pp3c1_35630V3.4,Pp3c1_35630V3.5	Ceratodon	Ceratodon:99		no
Pp3c1_sORF2585	Chr01:24981078-24981156	82.3	CDS	Pp3c1_35630V3.3,Pp3c1_35630V3.1,Pp3c1_35630V3.2,Pp3c1_35630V3.7,Pp3c1_35630V3.6,Pp3c1_35630V3.4,Pp3c1_35630V3.5				no
Pp3c1_sORF2586	Chr01:25021502-25021655	90.6	five_prime_UTR	Pp3c1_35690V3.1			Stop codon excision	no
Pp3c1_sORF2587	Chr01:25021664-25021808	80.2	five_prime_UTR	Pp3c1_35690V3.1			Start codon excision	no
Pp3c1_sORF2588	Chr01:25021895-25022006	97.3	CDS	Pp3c1_35690V3.2,Pp3c1_35690V3.1				no
Pp3c1_sORF2589	Chr01:25022645-25022750	99.2	CDS	Pp3c1_35690V3.2,Pp3c1_35690V3.1				no
Pp3c1_sORF259	Chr01:11928549-11928591	96.5	CDS	Pp3c1_15890V3.1				no
Pp3c1_sORF2590	Chr01:25048234-25048495	42909	five_prime_UTR	Pp3c1_35736V3.1				no
Pp3c1_sORF2591	Chr01:25048491-25048728	34	five_prime_UTR	Pp3c1_35760V3.2				no
Pp3c1_sORF2592	Chr01:25049063-25049210	97.7	five_prime_UTR	Pp3c1_35760V3.2				no
Pp3c1_sORF2593	Chr01:25050184-25050358	57.9	five_prime_UTR	Pp3c1_35760V3.2				no
Pp3c1_sORF2594	Chr01:25013320-25013425	78.1	five_prime_UTR	Pp3c1_35660V3.3,Pp3c1_35660V3.2			Excision	no
Pp3c1_sORF2595	Chr01:2174884-2175001	82.2	CDS	Pp3c1_2830V3.1				no
Pp3c1_sORF2596	Chr01:25054580-25054631	100	three_prime_UTR	Pp3c1_35760V3.3				no
Pp3c1_sORF2597	Chr01:25054833-25054875	96	three_prime_UTR	Pp3c1_35760V3.3				no
Pp3c1_sORF2598	Chr01:25017291-25017372	87.7	three_prime_UTR	Pp3c1_35660V3.1				no
Pp3c1_sORF2599	Chr01:25017733-25017922	83.5	CDS	Pp3c1_35675V3.2	Ceratodon	Ceratodon:2.3575		no
Pp3c1_sORF26	Chr01:10151179-10151230	98.2	CDS	Pp3c1_13910V3.2,Pp3c1_13910V3.1				no
Pp3c1_sORF260	Chr01:11929603-11929639	99.4	CDS	Pp3c1_15890V3.1				no
Pp3c1_sORF2600	Chr01:25020250-25020412	62.9	CDS	Pp3c1_35675V3.2				no
Pp3c1_sORF2601	Chr01:25020457-25020553	79.5	CDS	Pp3c1_35675V3.2				no
Pp3c1_sORF2602	Chr01:25021471-25021585	99.8	five_prime_UTR	Pp3c1_35675V3.2				no
Pp3c1_sORF2603	Chr01:25022895-25023039	79.6	five_prime_UTR	Pp3c1_35690V3.2	Ceratodon	Ceratodon:0.3187		no
Pp3c1_sORF2604	Chr01:25062531-25062576	97.3	CDS	Pp3c1_35760V3.3				no
Pp3c1_sORF2605	Chr01:25065526-25065625	97.6	CDS	Pp3c1_35770V3.7				no
Pp3c1_sORF2606	Chr01:25066897-25066945	91.3	CDS	Pp3c1_35770V3.7				no
Pp3c1_sORF2607	Chr01:25069288-25069327	97.3	CDS	Pp3c1_35770V3.7				no
Pp3c1_sORF2608	Chr01:25084735-25084897	99.5	CDS	Pp3c1_35800V3.2,Pp3c1_35800V3.1	Arabidopsis,Ceratodon,Chlamydomonas,Morchantia,Oryza,Selaginella,Sphagnum,Spirodela,Volvox,Zea	Ceratodon:0.2692,Morchantia:0.1488,Sphagnum:0.0949,Oryza:0.0775,Arabidopsis:0.1434,Chlamydomonas:0.1816,Volvox:0.1027,Zea:0.0709,Spirodela:0.0065,Selaginella:0.1664		no
Pp3c1_sORF2609	Chr01:25084906-25084957	94.6	CDS	Pp3c1_35800V3.2,Pp3c1_35800V3.1				no
Pp3c1_sORF261	Chr01:11930773-11930920	93.8	CDS	Pp3c1_15890V3.1				no
Pp3c1_sORF2610	Chr01:25085107-25085158	97.2	Interlaced	Pp3c1_35800V3.2				no
Pp3c1_sORF2611	Chr01:25085254-25085374	88.4	three_prime_UTR	Pp3c1_35800V3.2				no
Pp3c1_sORF2612	Chr01:25122942-25123029	94.9	five_prime_UTR,CDS	Pp3c1_35920V3.1,Pp3c1_35920V3.4,Pp3c1_35920V3.2,Pp3c1_35920V3.3				no
Pp3c1_sORF2613	Chr01:25123897-25123954	98	CDS	Pp3c1_35920V3.1,Pp3c1_35920V3.4,Pp3c1_35920V3.2,Pp3c1_35920V3.3				no
Pp3c1_sORF2614	Chr01:25124981-25125074	97.1	CDS	Pp3c1_35920V3.1,Pp3c1_35920V3.4,Pp3c1_35920V3.2,Pp3c1_35920V3.3				no
Pp3c1_sORF2615	Chr01:25092364-25092472	97.1	three_prime_UTR	Pp3c1_35820V3.1,Pp3c1_35820V3.3,Pp3c1_35820V3.2				no
Pp3c1_sORF2616	Chr01:25092922-25093060	59.2	CDS	Pp3c1_35820V3.1,Pp3c1_35820V3.3,Pp3c1_35820V3.2	Ceratodon	Ceratodon:5.591		no
Pp3c1_sORF2617	Chr01:25093336-25093510	98.7	CDS	Pp3c1_35820V3.1,Pp3c1_35820V3.3,Pp3c1_35820V3.2				no
Pp3c1_sORF2618	Chr01:25094851-25094968	97.8	CDS	Pp3c1_35820V3.1,Pp3c1_35820V3.3,Pp3c1_35820V3.2				no
Pp3c1_sORF2619	Chr01:25095133-25095244	96.1	CDS	Pp3c1_35820V3.1,Pp3c1_35820V3.3,Pp3c1_35820V3.2				no
Pp3c1_sORF262	Chr01:1193296-1193422	99.3	CDS	Pp3c1_1790V3.1,Pp3c1_1790V3.2				no
Pp3c1_sORF2620	Chr01:25095310-25095388	99.2	CDS	Pp3c1_35820V3.1,Pp3c1_35820V3.3,Pp3c1_35820V3.2				no
Pp3c1_sORF2621	Chr01:25136266-25136326	100	CDS	Pp3c1_35940V3.3,Pp3c1_35940V3.1,Pp3c1_35940V3.2				no
Pp3c1_sORF2622	Chr01:25103330-25103456	67.5	three_prime_UTR	Pp3c1_35860V3.5,Pp3c1_35860V3.4,Pp3c1_35860V3.1,Pp3c1_35860V3.2,Pp3c1_35860V3.3				no
Pp3c1_sORF2623	Chr01:25103440-25103539	78.4	three_prime_UTR	Pp3c1_35860V3.5,Pp3c1_35860V3.4,Pp3c1_35860V3.1,Pp3c1_35860V3.2,Pp3c1_35860V3.3				no
Pp3c1_sORF2624	Chr01:25103759-25103804	92.7	three_prime_UTR	Pp3c1_35860V3.5,Pp3c1_35860V3.4,Pp3c1_35860V3.1,Pp3c1_35860V3.2,Pp3c1_35860V3.3				no
Pp3c1_sORF2625	Chr01:25103822-25103945	96.2	three_prime_UTR	Pp3c1_35860V3.5,Pp3c1_35860V3.4,Pp3c1_35860V3.1,Pp3c1_35860V3.2,Pp3c1_35860V3.3				no
Pp3c1_sORF2626	Chr01:25103941-25104184	78.8	three_prime_UTR	Pp3c1_35860V3.5,Pp3c1_35860V3.4,Pp3c1_35860V3.1,Pp3c1_35860V3.2,Pp3c1_35860V3.3				no
Pp3c1_sORF2627	Chr01:25104388-25104442	96.7	CDS	Pp3c1_35860V3.5,Pp3c1_35860V3.4,Pp3c1_35860V3.1,Pp3c1_35860V3.2,Pp3c1_35860V3.3				no
Pp3c1_sORF2628	Chr01:25104943-25105072	99.2	CDS	Pp3c1_35860V3.5,Pp3c1_35860V3.4,Pp3c1_35860V3.1,Pp3c1_35860V3.2,Pp3c1_35860V3.3				no
Pp3c1_sORF2629	Chr01:25105225-25105465	75	Interlaced	Pp3c1_35860V3.5,Pp3c1_35860V3.4,Pp3c1_35860V3.1,Pp3c1_35860V3.2,Pp3c1_35860V3.3	Ceratodon	Ceratodon:0.7637		no
Pp3c1_sORF263	Chr01:11935199-11935256	94.7	lncRNA	Pp3c1_15900V3.2,Pp3c1_15900V3.1 | lncRNAs: lcl|Ppatens_Pp3c1_15900V3.2				no
Pp3c1_sORF2630	Chr01:25105595-25105703	91.1	five_prime_UTR	Pp3c1_35860V3.5,Pp3c1_35860V3.4,Pp3c1_35860V3.1,Pp3c1_35860V3.2,Pp3c1_35860V3.3				no
Pp3c1_sORF2631	Chr01:25109974-25110166	100	Interlaced	Pp3c1_35860V3.5				no
Pp3c1_sORF2632	Chr01:25110349-25110391	94.7	CDS	Pp3c1_35880V3.5				no
Pp3c1_sORF2633	Chr01:25111267-25111357	97.6	CDS	Pp3c1_35880V3.5	Sphagnum	Sphagnum:2.1971		no
Pp3c1_sORF2634	Chr01:25112745-25112868	76.7	CDS	Pp3c1_35880V3.5				no
Pp3c1_sORF2635	Chr01:25113168-25113261	98.6	CDS	Pp3c1_35880V3.5	Ceratodon	Ceratodon:0.7018		no
Pp3c1_sORF2636	Chr01:25114650-25114722	96.6	CDS	Pp3c1_35880V3.5				no
Pp3c1_sORF2637	Chr01:25115235-25115286	97.6	CDS	Pp3c1_35880V3.5				no
Pp3c1_sORF2638	Chr01:25115301-25115415	96	CDS	Pp3c1_35880V3.5				no
Pp3c1_sORF2639	Chr01:25116188-25116287	81.9	five_prime_UTR,CDS	Pp3c1_35880V3.1,Pp3c1_35880V3.3,Pp3c1_35880V3.4,Pp3c1_35880V3.2,Pp3c1_35880V3.5				no
Pp3c1_sORF264	Chr01:1193955-1194042	95.9	CDS	Pp3c1_1790V3.1,Pp3c1_1790V3.2				no
Pp3c1_sORF2640	Chr01:25116587-25116674	95.5	five_prime_UTR,CDS	Pp3c1_35880V3.1,Pp3c1_35880V3.3,Pp3c1_35880V3.4,Pp3c1_35880V3.2,Pp3c1_35880V3.5				no
Pp3c1_sORF2641	Chr01:25116689-25116824	100	five_prime_UTR,CDS	Pp3c1_35880V3.1,Pp3c1_35880V3.3,Pp3c1_35880V3.4,Pp3c1_35880V3.2,Pp3c1_35880V3.5	Ceratodon	Ceratodon:4.3605		no
Pp3c1_sORF2642	Chr01:25116854-25116968	99.4	five_prime_UTR,CDS	Pp3c1_35880V3.1,Pp3c1_35880V3.3,Pp3c1_35880V3.4,Pp3c1_35880V3.2,Pp3c1_35880V3.5				no
Pp3c1_sORF2643	Chr01:25116980-25117031	93.9	five_prime_UTR,CDS	Pp3c1_35880V3.1,Pp3c1_35880V3.3,Pp3c1_35880V3.4,Pp3c1_35880V3.2,Pp3c1_35880V3.5				no
Pp3c1_sORF2644	Chr01:25117112-25117169	94.7	five_prime_UTR,CDS	Pp3c1_35880V3.1,Pp3c1_35880V3.3,Pp3c1_35880V3.4,Pp3c1_35880V3.2,Pp3c1_35880V3.5				no
Pp3c1_sORF2645	Chr01:25126137-25126203	96.9	three_prime_UTR	Pp3c1_35930V3.2				no
Pp3c1_sORF2646	Chr01:25177066-25177105	97.8	CDS	Pp3c1_36000V3.2,Pp3c1_36000V3.5,Pp3c1_36000V3.1,Pp3c1_36000V3.4,Pp3c1_36000V3.3				no
Pp3c1_sORF2647	Chr01:25177513-25177711	95.9	CDS	Pp3c1_36000V3.2,Pp3c1_36000V3.5,Pp3c1_36000V3.1,Pp3c1_36000V3.4,Pp3c1_36000V3.3				no
Pp3c1_sORF2648	Chr01:25177732-25177813	94.2	CDS	Pp3c1_36000V3.2,Pp3c1_36000V3.5,Pp3c1_36000V3.1,Pp3c1_36000V3.4,Pp3c1_36000V3.3				no
Pp3c1_sORF2649	Chr01:25178805-25178916	80.9	three_prime_UTR	Pp3c1_36000V3.2,Pp3c1_36000V3.4			Start codon excision	no
Pp3c1_sORF265	Chr01:1194432-1194606	94.6	Interlaced	Pp3c1_1790V3.1,Pp3c1_1790V3.2				no
Pp3c1_sORF2650	Chr01:2518565-2518613	93.8	five_prime_UTR	Pp3c1_3160V3.1,Pp3c1_3160V3.2				no
Pp3c1_sORF2651	Chr01:25163592-25163625	99.7	CDS	Pp3c1_35980V3.2				no
Pp3c1_sORF2652	Chr01:25163634-25163763	97.7	CDS	Pp3c1_35980V3.2				no
Pp3c1_sORF2653	Chr01:2520544-2520598	93	three_prime_UTR	Pp3c1_3160V3.1,Pp3c1_3160V3.2				no
Pp3c1_sORF2654	Chr01:25173720-25173822	97.9	three_prime_UTR	Pp3c1_35990V3.2				no
Pp3c1_sORF2655	Chr01:25174491-25174557	98.7	three_prime_UTR,CDS	Pp3c1_35990V3.1,Pp3c1_35990V3.2				no
Pp3c1_sORF2656	Chr01:25174763-25174835	99.6	CDS	Pp3c1_35990V3.1,Pp3c1_35990V3.2				no
Pp3c1_sORF2657	Chr01:25176083-25176116	98.6	five_prime_UTR	Pp3c1_35990V3.2				no
Pp3c1_sORF2658	Chr01:25219280-25219427	62.8	five_prime_UTR	Pp3c1_36070V3.1				no
Pp3c1_sORF2659	Chr01:25181146-25181260	100	lncRNA	Pp3c1_36010V3.1 | lncRNAs: lcl|Ppatens_Pp3c1_36010V3.1				no
Pp3c1_sORF266	Chr01:1194559-1194688	97.5	Interlaced	Pp3c1_1790V3.1,Pp3c1_1790V3.2				no
Pp3c1_sORF2660	Chr01:25221732-25221876	65.3	CDS	Pp3c1_36070V3.1,Pp3c1_36070V3.2				no
Pp3c1_sORF2661	Chr01:25222108-25222150	96.5	three_prime_UTR	Pp3c1_36070V3.1,Pp3c1_36070V3.2				no
Pp3c1_sORF2662	Chr01:25243613-25243721	87.5	five_prime_UTR	Pp3c1_36090V3.6				no
Pp3c1_sORF2663	Chr01:25245336-25245384	97.4	CDS	Pp3c1_36100V3.2				no
Pp3c1_sORF2664	Chr01:25246527-25246638	97.4	CDS	Pp3c1_36100V3.2	Ceratodon	Ceratodon:0.9125		no
Pp3c1_sORF2665	Chr01:25251943-25252015	95.9	CDS	Pp3c1_36129V3.1,Pp3c1_36120V3.1				no
Pp3c1_sORF2666	Chr01:25252258-25252351	86.2	CDS	Pp3c1_36129V3.1,Pp3c1_36120V3.1				no
Pp3c1_sORF2667	Chr01:25252438-25252471	100	CDS	Pp3c1_36129V3.1,Pp3c1_36120V3.1				no
Pp3c1_sORF2668	Chr01:25252555-25252699	65.3	CDS	Pp3c1_36129V3.1,Pp3c1_36120V3.1				no
Pp3c1_sORF2669	Chr01:25252933-25253074	88.6	CDS	Pp3c1_36129V3.1,Pp3c1_36120V3.1				no
Pp3c1_sORF267	Chr01:11954308-11954548	68.7	five_prime_UTR	Pp3c1_15940V3.1,Pp3c1_15940V3.2				no
Pp3c1_sORF2670	Chr01:25253386-25253509	74.4	CDS	Pp3c1_36129V3.1,Pp3c1_36120V3.1				no
Pp3c1_sORF2671	Chr01:25253635-25253719	97.7	Interlaced	Pp3c1_36129V3.1,Pp3c1_36120V3.1				no
Pp3c1_sORF2672	Chr01:25254413-25254455	94.7	three_prime_UTR	Pp3c1_36129V3.1				no
Pp3c1_sORF2673	Chr01:25216459-25216522	93.8	CDS	Pp3c1_36050V3.2				no
Pp3c1_sORF2674	Chr01:25255367-25255619	92.7	lncRNA	Pp3c1_36140V3.1 | lncRNAs: lcl|Ppatens_Pp3c1_36140V3.1				no
Pp3c1_sORF2675	Chr01:25255554-25255608	93.7	lncRNA	Pp3c1_36140V3.1 | lncRNAs: lcl|Ppatens_Pp3c1_36140V3.1				no
Pp3c1_sORF2676	Chr01:25232623-25232680	98.1	CDS	Pp3c1_36080V3.2,Pp3c1_36080V3.3,Pp3c1_36080V3.4,Pp3c1_36080V3.1				no
Pp3c1_sORF2677	Chr01:25232683-25232845	98	CDS	Pp3c1_36080V3.2,Pp3c1_36080V3.3,Pp3c1_36080V3.4,Pp3c1_36080V3.1	Ceratodon	Ceratodon:2.1849		no
Pp3c1_sORF2678	Chr01:25271583-25271682	93.7	five_prime_UTR	Pp3c1_36180V3.3,Pp3c1_36180V3.5,Pp3c1_36180V3.1,Pp3c1_36180V3.6,Pp3c1_36180V3.4			Excision	no
Pp3c1_sORF2679	Chr01:25233779-25233905	61.7	five_prime_UTR	Pp3c1_36080V3.4,Pp3c1_36080V3.1			Excision	no
Pp3c1_sORF268	Chr01:11955313-11955427	94.8	CDS	Pp3c1_15940V3.1,Pp3c1_15940V3.2	Ceratodon	Ceratodon:6.7195		no
Pp3c1_sORF2680	Chr01:25238490-25238649	97.3	CDS	Pp3c1_36090V3.7,Pp3c1_36090V3.3,Pp3c1_36090V3.2,Pp3c1_36090V3.9,Pp3c1_36090V3.6,Pp3c1_36090V3.10,Pp3c1_36090V3.4,Pp3c1_36090V3.5,Pp3c1_36090V3.1,Pp3c1_36090V3.8				no
Pp3c1_sORF2681	Chr01:25238697-25238745	99.8	CDS	Pp3c1_36090V3.7,Pp3c1_36090V3.3,Pp3c1_36090V3.2,Pp3c1_36090V3.9,Pp3c1_36090V3.6,Pp3c1_36090V3.10,Pp3c1_36090V3.4,Pp3c1_36090V3.5,Pp3c1_36090V3.1,Pp3c1_36090V3.8				no
Pp3c1_sORF2682	Chr01:25238760-25238829	95.2	CDS	Pp3c1_36090V3.9			Start codon excision	no
Pp3c1_sORF2683	Chr01:25290566-25290602	95.9	Interlaced	Pp3c1_36220V3.1,Pp3c1_36220V3.3,Pp3c1_36220V3.2				no
Pp3c1_sORF2684	Chr01:25317597-25317630	94.6	five_prime_UTR,CDS	Pp3c1_36280V3.2,Pp3c1_36280V3.1,Pp3c1_36280V3.3				no
Pp3c1_sORF2685	Chr01:25318272-25318389	100	CDS	Pp3c1_36280V3.2,Pp3c1_36280V3.1,Pp3c1_36280V3.3				no
Pp3c1_sORF2686	Chr01:25318653-25318710	100	CDS	Pp3c1_36280V3.2,Pp3c1_36280V3.1,Pp3c1_36280V3.3				no
Pp3c1_sORF2687	Chr01:25329513-25329576	87.8	CDS	Pp3c1_36290V3.2				no
Pp3c1_sORF2688	Chr01:2533543-2533615	96.1	CDS	Pp3c1_3190V3.1				no
Pp3c1_sORF2689	Chr01:25343841-25344000	81.3	lncRNA	Pp3c1_36330V3.2 | lncRNAs: lcl|Ppatens_Pp3c1_36360V3.1				no
Pp3c1_sORF269	Chr01:11955436-11955514	86	CDS	Pp3c1_15940V3.1,Pp3c1_15940V3.2				no
Pp3c1_sORF2690	Chr01:25343993-25344083	99.1	lncRNA	Pp3c1_36360V3.1 | lncRNAs: lcl|Ppatens_Pp3c1_36360V3.1				no
Pp3c1_sORF2691	Chr01:25345819-25346002	78.4	lncRNA	Pp3c1_36360V3.1 | lncRNAs: lcl|Ppatens_Pp3c1_36360V3.1				no
Pp3c1_sORF2692	Chr01:25307758-25307815	93.3	CDS	Pp3c1_36240V3.2,Pp3c1_36240V3.1				no
Pp3c1_sORF2693	Chr01:25346929-25347205	43002	lncRNA	Pp3c1_36360V3.1 | lncRNAs: lcl|Ppatens_Pp3c1_36360V3.1				no
Pp3c1_sORF2694	Chr01:25308337-25308535	47.7	CDS	Pp3c1_36240V3.2,Pp3c1_36240V3.1	Ceratodon,Sphagnum	Ceratodon:2.527,Sphagnum:1.7131		no
Pp3c1_sORF2695	Chr01:25308751-25308805	92.5	CDS	Pp3c1_36240V3.2,Pp3c1_36240V3.1				no
Pp3c1_sORF2696	Chr01:25309102-25309186	100	CDS	Pp3c1_36240V3.2,Pp3c1_36240V3.1				no
Pp3c1_sORF2697	Chr01:25348055-25348196	98.6	lncRNA	Pp3c1_36360V3.1 | lncRNAs: lcl|Ppatens_Pp3c1_36360V3.1				no
Pp3c1_sORF2698	Chr01:25348304-25348427	87.9	lncRNA	Pp3c1_36360V3.1 | lncRNAs: lcl|Ppatens_Pp3c1_36360V3.1				no
Pp3c1_sORF2699	Chr01:25309519-25309726	99.9	CDS	Pp3c1_36240V3.2,Pp3c1_36240V3.1				no
Pp3c1_sORF27	Chr01:10152119-10152302	48.9	three_prime_UTR	Pp3c1_13910V3.2				no
Pp3c1_sORF270	Chr01:11955976-11956054	94.9	CDS	Pp3c1_15940V3.1,Pp3c1_15940V3.2				no
Pp3c1_sORF2700	Chr01:25309771-25309825	99.8	CDS	Pp3c1_36240V3.2,Pp3c1_36240V3.1				no
Pp3c1_sORF2701	Chr01:25313798-25313912	100	Interlaced	Pp3c1_36270V3.2,Pp3c1_36270V3.1				no
Pp3c1_sORF2702	Chr01:25371668-25371755	99.2	three_prime_UTR	Pp3c1_36390V3.5,Pp3c1_36390V3.1,Pp3c1_36390V3.4			Excision	no
Pp3c1_sORF2703	Chr01:25339937-25340063	64.7	CDS	Pp3c1_36320V3.1,Pp3c1_36320V3.2				no
Pp3c1_sORF2704	Chr01:25342077-25342266	48.5	three_prime_UTR	Pp3c1_36330V3.2				no
Pp3c1_sORF2705	Chr01:25342632-25342743	86.6	three_prime_UTR	Pp3c1_36330V3.2,Pp3c1_36330V3.1				no
Pp3c1_sORF2706	Chr01:25342879-25343038	98.1	CDS	Pp3c1_36330V3.2,Pp3c1_36330V3.1				no
Pp3c1_sORF2707	Chr01:25348502-25348670	55	CDS	Pp3c1_36370V3.3,Pp3c1_36370V3.1,Pp3c1_36370V3.2				no
Pp3c1_sORF2708	Chr01:25350585-25350621	94.1	CDS	Pp3c1_36370V3.3,Pp3c1_36370V3.1,Pp3c1_36370V3.2				no
Pp3c1_sORF2709	Chr01:25351049-25351169	99.3	CDS	Pp3c1_36370V3.3,Pp3c1_36370V3.1,Pp3c1_36370V3.2				no
Pp3c1_sORF271	Chr01:11956446-11956557	92.7	three_prime_UTR	Pp3c1_15940V3.1,Pp3c1_15940V3.2				no
Pp3c1_sORF2710	Chr01:2540130-2540310	94.8	CDS	Pp3c1_3210V3.3,Pp3c1_3210V3.2,Pp3c1_3210V3.4,Pp3c1_3210V3.1				no
Pp3c1_sORF2711	Chr01:25379594-25379672	89.2	CDS	Pp3c1_36410V3.6				no
Pp3c1_sORF2712	Chr01:25380503-25380662	49.8	five_prime_UTR	Pp3c1_36410V3.6				no
Pp3c1_sORF2713	Chr01:25380704-25380854	94.2	five_prime_UTR	Pp3c1_36410V3.6				no
Pp3c1_sORF2714	Chr01:25381148-25381253	86.7	five_prime_UTR	Pp3c1_36410V3.6			Start codon excision	no
Pp3c1_sORF2715	Chr01:25381356-25381491	99.4	five_prime_UTR	Pp3c1_36410V3.6				no
Pp3c1_sORF2716	Chr01:25381491-25381524	95.1	five_prime_UTR	Pp3c1_36410V3.6				no
Pp3c1_sORF2717	Chr01:2542594-2542897	42976	three_prime_UTR	Pp3c1_3210V3.3,Pp3c1_3210V3.2,Pp3c1_3210V3.4				no
Pp3c1_sORF2718	Chr01:25427079-25427304	45.2	lncRNA	Pp3c1_36480V3.1 | lncRNAs: lcl|Ppatens_Pp3c1_36480V3.1				no
Pp3c1_sORF2719	Chr01:25428976-25429051	94	CDS	Pp3c1_36490V3.1,Pp3c1_36490V3.2				no
Pp3c1_sORF272	Chr01:1198865-1199015	55.5	five_prime_UTR	Pp3c1_1810V3.2,Pp3c1_1810V3.1				no
Pp3c1_sORF2720	Chr01:25431516-25431597	91.2	CDS	Pp3c1_36490V3.1,Pp3c1_36490V3.2				no
Pp3c1_sORF2721	Chr01:25431927-25432215	97	three_prime_UTR	Pp3c1_36490V3.1,Pp3c1_36490V3.2				no
Pp3c1_sORF2722	Chr01:25432550-25432598	99.1	three_prime_UTR	Pp3c1_36490V3.1,Pp3c1_36490V3.2				no
Pp3c1_sORF2723	Chr01:25398329-25398413	96.8	five_prime_UTR	Pp3c1_36430V3.4			Stop codon excision	no
Pp3c1_sORF2724	Chr01:25398629-25398716	89.7	five_prime_UTR	Pp3c1_36430V3.1,Pp3c1_36430V3.3,Pp3c1_36430V3.5,Pp3c1_36430V3.4,Pp3c1_36430V3.6,Pp3c1_36430V3.2				no
Pp3c1_sORF2725	Chr01:25439341-25439377	97.1	five_prime_UTR	Pp3c1_36530V3.3,Pp3c1_36530V3.1			Excision	no
Pp3c1_sORF2726	Chr01:25401207-25401240	99.2	three_prime_UTR,CDS	Pp3c1_36440V3.1,Pp3c1_36440V3.5,Pp3c1_36440V3.2,Pp3c1_36440V3.3,Pp3c1_36440V3.4				no
Pp3c1_sORF2727	Chr01:25440667-25440943	93	CDS	Pp3c1_36530V3.3,Pp3c1_36530V3.1,Pp3c1_36530V3.2	Ceratodon	Ceratodon:1.7852		no
Pp3c1_sORF2728	Chr01:25402150-25402192	97.5	CDS	Pp3c1_36440V3.1,Pp3c1_36440V3.5,Pp3c1_36440V3.2,Pp3c1_36440V3.3,Pp3c1_36440V3.4				no
Pp3c1_sORF2729	Chr01:25441621-25441888	99.9	CDS	Pp3c1_36530V3.3,Pp3c1_36530V3.1,Pp3c1_36530V3.2				no
Pp3c1_sORF273	Chr01:11811700-11811772	89.4	three_prime_UTR	Pp3c1_15730V3.2			Stop codon excision	no
Pp3c1_sORF2730	Chr01:25442059-25442236	99.6	CDS	Pp3c1_36530V3.3,Pp3c1_36530V3.1,Pp3c1_36530V3.2				no
Pp3c1_sORF2731	Chr01:25442371-25442431	100	CDS	Pp3c1_36530V3.3,Pp3c1_36530V3.1,Pp3c1_36530V3.2				no
Pp3c1_sORF2732	Chr01:25406270-25406330	98.6	five_prime_UTR,CDS	Pp3c1_36440V3.1,Pp3c1_36440V3.5,Pp3c1_36440V3.2,Pp3c1_36440V3.3,Pp3c1_36440V3.4				no
Pp3c1_sORF2733	Chr01:25406474-25406594	96.2	five_prime_UTR,CDS	Pp3c1_36440V3.1,Pp3c1_36440V3.5,Pp3c1_36440V3.2,Pp3c1_36440V3.3,Pp3c1_36440V3.4				no
Pp3c1_sORF2734	Chr01:25407442-25407646	64	five_prime_UTR	Pp3c1_36440V3.1,Pp3c1_36440V3.5,Pp3c1_36440V3.2,Pp3c1_36440V3.3,Pp3c1_36440V3.4				no
Pp3c1_sORF2735	Chr01:2544832-2545078	99.7	CDS	Pp3c1_3230V3.3,Pp3c1_3230V3.2,Pp3c1_3230V3.1	Ceratodon,Morchantia,Selaginella	Ceratodon:5.6759,Morchantia:3.1486,Selaginella:0.7378		no
Pp3c1_sORF2736	Chr01:25448369-25448477	93.9	five_prime_UTR	Pp3c1_36560V3.1,Pp3c1_36560V3.2,Pp3c1_36560V3.3,Pp3c1_36560V3.4				no
Pp3c1_sORF2737	Chr01:25449049-25449091	91	CDS	Pp3c1_36560V3.1,Pp3c1_36560V3.5,Pp3c1_36560V3.4			Excision	no
Pp3c1_sORF2738	Chr01:25449118-25449187	89.8	CDS	Pp3c1_36560V3.1,Pp3c1_36560V3.5,Pp3c1_36560V3.4			Excision	no
Pp3c1_sORF2739	Chr01:2214646-2214751	99.6	CDS	Pp3c1_2880V3.2,Pp3c1_2880V3.3,Pp3c1_2880V3.1				no
Pp3c1_sORF274	Chr01:11812917-11813115	100	CDS	Pp3c1_15740V3.1,Pp3c1_15740V3.2	Ceratodon,Selaginella,Sphagnum,Spirodela	Ceratodon:5.4548,Sphagnum:21.1411,Spirodela:10.8387,Selaginella:4.2064		no
Pp3c1_sORF2740	Chr01:2215021-2215237	96.6	CDS	Pp3c1_2880V3.2,Pp3c1_2880V3.3,Pp3c1_2880V3.1				no
Pp3c1_sORF2741	Chr01:25419697-25419802	79	Interlaced	Pp3c1_36470V3.1,Pp3c1_36470V3.2,Pp3c1_36470V3.3				no
Pp3c1_sORF2742	Chr01:25421906-25422011	81.2	five_prime_UTR	Pp3c1_36470V3.3			Excision	no
Pp3c1_sORF2743	Chr01:2547192-2547261	100	CDS	Pp3c1_3230V3.3,Pp3c1_3230V3.2,Pp3c1_3230V3.1				no
Pp3c1_sORF2744	Chr01:2547546-2547621	99.9	CDS	Pp3c1_3230V3.3,Pp3c1_3230V3.2,Pp3c1_3230V3.1				no
Pp3c1_sORF2745	Chr01:25480784-25480898	97.6	CDS	Pp3c1_36570V3.2,Pp3c1_36570V3.1	Ceratodon	Ceratodon:1.2879		no
Pp3c1_sORF2746	Chr01:25482270-25482360	85.2	three_prime_UTR	Pp3c1_36570V3.2,Pp3c1_36570V3.1				no
Pp3c1_sORF2747	Chr01:25484140-25484188	97.6	CDS	Pp3c1_36580V3.1,Pp3c1_36580V3.2				no
Pp3c1_sORF2748	Chr01:25484861-25484915	96.6	CDS	Pp3c1_36580V3.1,Pp3c1_36580V3.2				no
Pp3c1_sORF2749	Chr01:25486078-25486123	92.5	CDS	Pp3c1_36580V3.1,Pp3c1_36580V3.2				no
Pp3c1_sORF275	Chr01:11814329-11814452	100	CDS	Pp3c1_15750V3.1,Pp3c1_15750V3.3,Pp3c1_15750V3.2				no
[truncated: 68,105 more rows]
