# Supplementary material for: Distinct types of short open reading frames are translated in plant cells
Source: HighWire-hosted journal article supplement (doi:10.1101/gr.253302.119), 2019-08-06
Supplement: Supplemental_Table_S2.docx.docx [file Supplemental_Table_S2.docx.docx]

| **Dataset type** | **Description** | **Dataset identifier** |
| --- | --- | --- |
| “Peptidomic” | Endogenous peptides extracted from gametophores, protonemata and protoplasts and analyzed by a TripleTOF 5600+ mass spectrometer | PRIDE identifier - PXD007923 |
| Endogenous peptides extracted from gametophores, protonemata and protoplasts and analyzed by a Q Exactive HF mass spectrometer | PRIDE identifier – PXD007922 |
| “Proteomic” | Tryptic peptides generated during the proteomic analysis of moss tissues – gametophores, protonemata and protoplasts from our previous study (Fesenko et al, 2017; DOI: 10.1038/s41598-017-02970-z) | PRIDE identifier PXD005223  (DOI: 10.6019/PXD005223) |
| Tryptic peptides generated during the proteomic analysis of moss tissues – gametophores, protonemata and protoplasts and analyzed by a Q Exactive HF mass spectrometer | PRIDE identifier - PXD007973 |

**Supplemental Table S2.** List of the datasets used for mass-spectrometry analysis.
