# Supplementary material for: Distinct types of short open reading frames are translated in plant cells
Source: HighWire-hosted journal article supplement (doi:10.1101/gr.253302.119), 2019-08-06
Supplement: Supplemental_Table_S3.xlsx.xlsx [file Supplemental_Table_S3.xlsx.xlsx]

## Sheet: Suppl Table S3
Supplemental Table S3. The list of all PSMs for high-confidence sORF candidate set
sORFs	Peptide sequence	Score	PEP	MS/MS count	Instrument	Sample	Peptidomic dataset	Proteomic dataset
Pp3c1_sORF1785	DAAAEKMDQLGDAVKGAF	108.56	3.6199e-08	1	Orbitrap	gametophores-2	+	+
Pp3c1_sORF1785	KPTPEELESEVAK	75.683	0.0064457	1	TripleTOF	gametophores-2	+	+
Pp3c1_sORF1785	KPTPEELESEVAK	100.02	0.00016575	1	TripleTOF	gametophores-1	+	+
Pp3c1_sORF1785	KPTPEELESEVAK	107.97	0.00082128	1	Orbitrap	gametophores-1	+	+
Pp3c1_sORF1909	NIFDLSAR	67.032	0.0041483	1	TripleTOF	gametophores-4	-	+
Pp3c1_sORF3112	GVHPALQWIR	66.621	0.00088877	1	Orbitrap	protonema-6	-	+
Pp3c10_sORF2639	MLNEYGR	72.021	0.0059462	1	Orbitrap	gametophores-1	-	+
Pp3c11_sORF461	VIASADLVFV	105.12	0.005504	1	Orbitrap	protonema-3	+	-
Pp3c11_sORF461	VIASADLVFV	105.12	0.005504	1	Orbitrap	protonema-4	+	-
Pp3c11_sORF461	VIASADLVFV	105.39	0.0054401	1	Orbitrap	protonema-3	+	-
Pp3c11_sORF461	VIASADLVFV	105.39	0.0054401	2	Orbitrap	protonema-3	+	-
Pp3c11_sORF461	VIASADLVFV	105.39	0.0054401	1	Orbitrap	protonema-4	+	-
Pp3c11_sORF461	VIASADLVFV	105.39	0.0054401	2	Orbitrap	protonema-4	+	-
Pp3c11_sORF461	VIASADLVFV	107.43	0.0049096	1	Orbitrap	protonema-4	+	-
Pp3c11_sORF461	VIASADLVFV	119.89	0.0012292	3	Orbitrap	protonema-7	+	-
Pp3c11_sORF847	MHNADVLR	65.676	0.0047196	2	TripleTOF	protonemata-1	-	+
Pp3c11_sORF847	MHNADVLR	66.087	0.0045465	3	TripleTOF	gametophores-2	-	+
Pp3c11_sORF847	MHNADVLR	69.383	0.0099975	1	Orbitrap	protoplasts-1	-	+
Pp3c11_sORF847	MHNADVLR	71.715	0.0033441	2	TripleTOF	protonemata-1	-	+
Pp3c11_sORF847	MHNADVLR	74.439	0.0074437	2	Orbitrap	gametophores-1	-	+
Pp3c11_sORF847	MHNADVLR	75.269	0.0070243	1	Orbitrap	gametophores-2	-	+
Pp3c11_sORF847	MHNADVLR	76.847	0.0062272	6	Orbitrap	protoplasts-2	-	+
Pp3c11_sORF847	MHNADVLR	79.939	0.0051859	3	Orbitrap	protonema-1	-	+
Pp3c11_sORF847	MHNADVLR	79.939	0.0051859	2	Orbitrap	protonema-2	-	+
Pp3c11_sORF847	MHNADVLR	81.381	0.0049891	2	Orbitrap	protonema-1	-	+
Pp3c11_sORF847	MHNADVLR	81.381	0.0049891	1	Orbitrap	protoplasts-1	-	+
Pp3c11_sORF847	MHNADVLR	81.381	0.0049891	1	Orbitrap	gametophores-2	-	+
Pp3c11_sORF847	MHNADVLR	86.512	0.004289	6	Orbitrap	gametophores-3	-	+
Pp3c11_sORF847	MHNADVLR	86.512	0.004289	7	Orbitrap	gametophores-4	-	+
Pp3c11_sORF847	MHNADVLR	89.673	0.0038577	2	Orbitrap	protonema-2	-	+
Pp3c11_sORF847	MHNADVLR	92.191	0.0035142	3	Orbitrap	protoplasts-2	-	+
Pp3c11_sORF847	MHNADVLR	94.163	0.0032451	2	Orbitrap	protonema-2	-	+
Pp3c11_sORF847	MHNADVLR	94.163	0.0032451	6	Orbitrap	gametophores-3	-	+
Pp3c11_sORF847	MHNADVLR	94.163	0.0032451	6	Orbitrap	gametophores-4	-	+
Pp3c11_sORF847	MHNADVLR	94.163	0.0032451	7	Orbitrap	gametophores-4	-	+
Pp3c11_sORF847	MHNADVLR	98.415	0.0027864	6	Orbitrap	gametophores-4	-	+
Pp3c11_sORF847	MHNADVLR	99.384	0.0027621	6	Orbitrap	gametophores-3	-	+
Pp3c12_sORF172	KDASSENTAGVEAETGSLVRG	93.062	6.1674e-05	1	Orbitrap	protonema-5	+	-
Pp3c12_sORF2000	SISLLATQ	79.116	0.0014452	1	TripleTOF	gametophores-1	-	+
Pp3c12_sORF963	VKVSPRRGRLDSVA	70.399	0.0068639	1	Orbitrap	protonema-4	+	-
Pp3c13_sORF2018	IVSLGGFQVVF	84.568	0.0064169	1	Orbitrap	protonema-2	+	-
Pp3c14_sORF612	KLVLISEEMNP	80.438	0.0034751	1	Orbitrap	protoplast-1	+	-
Pp3c14_sORF645	LTLSLGATWLLRWM	72.006	0.0054401	1	Orbitrap	protonema-4	+	-
Pp3c15_sORF33	AVEECLVQMLSR	80.688	0.00057104	1	TripleTOF	protonemata-2	-	+
Pp3c16_sORF1793	LSTTCNPFSAR	70.919	0.00066327	1	TripleTOF	protonemata-4	-	+
Pp3c16_sORF2123	LAVSVAVTAAPA	73.248	0.003052	1	Orbitrap	protoplast-1	+	-
Pp3c16_sORF2123	LAVSVAVTAAPA	75.213	0.0021823	2	Orbitrap	protoplast-1	+	-
Pp3c16_sORF2123	LAVSVAVTAAPA	85.212	0.0009174	1	Orbitrap	protoplast-1	+	-
Pp3c17_sORF323	MLPYRMHMLSTSHLACR	60.255	0.00092741	1	TripleTOF	gametophores-1	-	+
Pp3c18_sORF1035	MIIVLLKMPATP	76.827	0.006547	1	Orbitrap	protonema-4	+	-
Pp3c18_sORF1199	LINASNAELLR	60.91	0.0067883	2	Orbitrap	gametophores-4	-	+
Pp3c18_sORF1199	LINASNAELLR	67.494	0.0014603	1	TripleTOF	protonemata-1	-	+
Pp3c18_sORF1199	LINASNAELLR	69.812	0.0036925	1	Orbitrap	gametophores-3	-	+
Pp3c18_sORF1228	WNDLHLPLSSDPTVLGQT	66.335	0.0015249	1	Orbitrap	protonema-4	+	-
Pp3c18_sORF57	NGPATTAATTPPEVVGEFGGKGWRPSS	61.602	0.001491	1	Orbitrap	gametophores-2	+	-
Pp3c18_sORF57	EVVGEFGGKGWRP	66.393	0.0051836	1	Orbitrap	protoplast-4	+	-
Pp3c18_sORF57	NGPATTAATTPPEVVGEFGGKGWRPS	66.447	0.00083902	1	TripleToF	protonema-1	+	-
Pp3c18_sORF57	NGPATTAATTPPEVVGEFGGKGWRPS	68.231	3.2898e-08	1	TripleToF	gametophores-4	+	-
Pp3c18_sORF57	NGPATTAATTPPEVVGEFGGKG	68.552	0.00058243	1	TripleToF	gametophores-2	+	-
Pp3c18_sORF57	NGPATTAATTPPEVVGEFGGKGWRPSS	69.444	1.6841e-10	2	Orbitrap	gametophores-1	+	-
Pp3c18_sORF57	NGPATTAATTPPEVVGEFGGKGWRPSS	71.085	1.3001e-10	2	Orbitrap	gametophores-1	+	-
Pp3c18_sORF57	NGPATTAATTPPEVVGE	72.34	7.2074e-05	3	Orbitrap	gametophores-1	+	-
Pp3c18_sORF57	NGPATTAATTPPEVVGEFGGKGWRPS	72.355	0.0038993	1	TripleToF	protonema-1	+	-
Pp3c18_sORF57	NGPATTAATTPPEVVGEFGGKG	72.797	0.003108	1	TripleToF	gametophores-2	+	-
Pp3c18_sORF57	NGPATTAATTPPEVVGEFGGKG	75.463	0.0040209	1	TripleToF	gametophores-3	+	-
Pp3c18_sORF57	NGPATTAATTPPEVVGEFGGKG	76.807	0.00073038	1	TripleToF	gametophores-2	+	-
Pp3c18_sORF57	NGPATTAATTPPEVVGEFGGKGWRPSS	79.021	7.108e-13	1	TripleToF	gametophores-2	+	-
Pp3c18_sORF57	NGPATTAATTPPEVVGEFGGKGWRPS	79.36	1.5809e-08	1	TripleToF	protonema-1	+	-
Pp3c18_sORF57	NGPATTAATTPPEVVGEFGGKGWRPSS	79.558	1.8666e-15	2	Orbitrap	gametophores-1	+	-
Pp3c18_sORF57	NGPATTAATTPPEVVGEFGGKG	81.884	2.9077e-06	4	TripleToF	gametophores-3	+	-
Pp3c18_sORF57	NGPATTAATTPPEVVGE	83.358	0.0054367	1	TripleToF	gametophores-2	+	-
Pp3c18_sORF57	NGPATTAATTPPEVVGE	84.053	7.7418e-06	3	Orbitrap	gametophores-1	+	-
Pp3c18_sORF57	NGPATTAATTPPEVVGEFGGKGWRPS	84.404	0.000168	1	Orbitrap	gametophores-2	+	-
Pp3c18_sORF57	NGPATTAATTPPEVVGEFGGKG	84.874	0.00070344	1	TripleToF	gametophores-2	+	-
Pp3c18_sORF57	EVVGEFGGKGWRP	86.882	0.0013336	1	Orbitrap	protonema-4	+	-
Pp3c18_sORF57	NGPATTAATTPPEVVGEFGGKG	88.73	0.00029448	1	Orbitrap	gametophores-2	+	-
Pp3c18_sORF57	NGPATTAATTPPEVVGEFGGKGWRPS	88.79	1.1755e-05	1	Orbitrap	gametophores-2	+	-
Pp3c18_sORF57	NGPATTAATTPPEVVGEFGGKGWRPSS	89.882	6.9252e-13	1	TripleToF	protonema-2	+	-
Pp3c18_sORF57	NGPATTAATTPPEVVGEFGGKGWRPSS	90.268	8.4214e-11	1	TripleToF	gametophores-2	+	-
Pp3c18_sORF57	NGPATTAATTPPEVVGEFGGKG	91.733	7.5842e-05	1	TripleToF	gametophores-2	+	-
Pp3c18_sORF57	NGPATTAATTPPEVVGEFGGKG	92.792	5.0475e-05	1	TripleToF	gametophores-2	+	-
Pp3c18_sORF57	NGPATTAATTPPEVVGEFGGKG	92.977	0.0039399	1	TripleToF	protonema-2	+	-
Pp3c18_sORF57	NGPATTAATTPPEVVGEFGGKG	95.263	0.00067245	1	TripleToF	gametophores-1	+	-
Pp3c18_sORF57	NGPATTAATTPPEVVGEFGGKG	96.579	1.9731e-08	1	TripleToF	gametophores-2	+	-
Pp3c18_sORF57	NGPATTAATTPPEVVGEFGGKGWRPS	97.059	3.3647e-20	1	TripleToF	gametophores-2	+	-
Pp3c18_sORF57	NGPATTAATTPPEVVGEFGGKGWRPSS	98.968	1.6684e-14	1	TripleToF	gametophores-2	+	-
Pp3c18_sORF57	EVVGEFGGKGWRP	99.5	0.0085616	1	TripleToF	protonema-4	+	-
Pp3c18_sORF57	NGPATTAATTPPEVVGE	100.02	0.0029462	1	TripleToF	protonema-2	+	-
Pp3c18_sORF57	NGPATTAATTPPEVVGE	101.04	0.0029715	2	TripleToF	gametophores-1	+	-
Pp3c18_sORF57	NGPATTAATTPPEVVGEFGGKG	104.44	0.0019092	1	TripleToF	gametophores-1	+	-
Pp3c18_sORF57	NGPATTAATTPPEVVGEFGGKG	106.73	1.5485e-11	1	TripleToF	gametophores-2	+	-
Pp3c18_sORF57	NGPATTAATTPPEVVGEFGGKGWRPS	107.47	2.9395e-19	1	TripleToF	gametophores-2	+	-
Pp3c18_sORF57	NGPATTAATTPPEVVGEFGGKGWRPSS	110.78	2.929e-25	1	TripleToF	gametophores-2	+	-
Pp3c18_sORF57	NGPATTAATTPPEVVGE	110.93	1.4359e-07	1	Orbitrap	protonema-1	+	-
Pp3c18_sORF57	NGPATTAATTPPEVVGEFGGKG	111.78	0.0020615	1	TripleToF	gametophores-1	+	-
Pp3c18_sORF57	GPATTAATTPPEVVGE	112.3	0.0024942	1	Orbitrap	gametophores-2	+	-
Pp3c18_sORF57	NGPATTAATTPPEVVGEFGGKGWRPSS	114.68	8.9471e-32	4	TripleToF	protonema-1	+	-
Pp3c18_sORF57	NGPATTAATTPPEVVGEFGGKGWRPSS	115.68	5.1654e-27	1	TripleToF	gametophores-1	+	-
Pp3c18_sORF57	NGPATTAATTPPEVVGEFGGKGWRPS	117.61	6.0887e-45	1	Orbitrap	protonema-1	+	-
Pp3c18_sORF57	NGPATTAATTPPEVVGEFGGKGWRPSS	117.61	2.9611e-46	1	Orbitrap	protonema-1	+	-
Pp3c18_sORF57	NGPATTAATTPPEVVGEFGGKGWRPSS	117.83	7.1418e-27	1	TripleToF	protonema-2	+	-
Pp3c18_sORF57	NGPATTAATTPPEVVGEFGGKG	120.92	2.6221e-05	1	TripleToF	gametophores-2	+	-
Pp3c18_sORF57	NGPATTAATTPPEVVGEFGGKGWRPS	122.38	1.9731e-17	2	TripleToF	gametophores-2	+	-
Pp3c18_sORF57	NGPATTAATTPPEVVGEFGGKGWRPS	124.1	6.1994e-28	1	TripleToF	gametophores-2	+	-
Pp3c18_sORF57	NGPATTAATTPPEVVGEFGGKG	124.29	9.8862e-11	2	TripleToF	protonema-2	+	-
Pp3c18_sORF57	EVVGEFGGKGWRP	128.67	0.0096517	3	TripleToF	protonema-1	+	-
Pp3c18_sORF57	NGPATTAATTPPEVVGEFGGKGWRPSS	130.51	2.1956e-40	1	TripleToF	gametophores-4	+	-
Pp3c18_sORF57	NGPATTAATTPPEVVGEFGGKGWRPSS	130.69	2.1083e-40	1	TripleToF	gametophores-1	+	-
Pp3c18_sORF57	NGPATTAATTPPEVVGEFGGKGWRPS	131.65	5.0346e-27	3	TripleToF	protonema-2	+	-
Pp3c18_sORF57	NGPATTAATTPPEVVGE	133.07	0.0042523	3	TripleToF	gametophores-2	+	-
Pp3c18_sORF57	NGPATTAATTPPEVVGEFGGKGWRPSS	135.56	1.8773e-48	1	TripleToF	gametophores-1	+	-
Pp3c18_sORF57	NGPATTAATTPPEVVGEFGGKGWRPSS	141.24	4.0855e-16	4	TripleToF	gametophores-3	+	-
Pp3c18_sORF57	NGPATTAATTPPEVVGE	142.39	9.917e-09	1	TripleToF	protonema-4	+	-
Pp3c18_sORF57	NGPATTAATTPPEVVGEFGGKGWRPSS	144.31	2.0158e-58	1	TripleToF	gametophores-2	+	-
Pp3c18_sORF57	NGPATTAATTPPEVVGEFGGKGWRPSS	144.55	1.8166e-58	1	TripleToF	gametophores-1	+	-
Pp3c18_sORF57	NGPATTAATTPPEVVGE	147.72	0.00076893	1	TripleToF	gametophores-1	+	-
Pp3c18_sORF57	NGPATTAATTPPEVVGEFGGKGWRPSS	152.17	7.2913e-71	1	TripleToF	gametophores-2	+	-
Pp3c18_sORF57	NGPATTAATTPPEVVGEFGGKGWRPSS	155.16	6.6884e-83	1	TripleToF	gametophores-1	+	-
Pp3c18_sORF57	NGPATTAATTPPEVVGE	160.86	0.00087609	2	TripleToF	gametophores-2	+	-
Pp3c18_sORF57	NGPATTAATTPPEVVGEFGGKGWRPSS	161.2	2.8908e-96	1	TripleToF	gametophores-2	+	-
Pp3c18_sORF57	NGPATTAATTPPEVVGEFGGKG	162.7	1.1073e-31	1	Orbitrap	protonema-1	+	-
Pp3c18_sORF57	NGPATTAATTPPEVVGE	164.48	5.1763e-38	4	TripleToF	protonema-2	+	-
Pp3c18_sORF57	NGPATTAATTPPEVVGEFGGKG	165.58	1.7159e-13	1	TripleToF	protonema-4	+	-
Pp3c18_sORF57	NGPATTAATTPPEVVGEFGGKGWRPSS	167.95	1.8875e-111	1	TripleToF	gametophores-2	+	-
Pp3c18_sORF57	NGPATTAATTPPEVVGE	169.57	1.0873e-08	1	TripleToF	gametophores-2	+	-
Pp3c18_sORF57	NGPATTAATTPPEVVGEFGGKGWRPSS	170.68	2.7963e-128	1	TripleToF	gametophores-2	+	-
Pp3c18_sORF57	NGPATTAATTPPEVVGEFGGKGWRPSS	172.02	2.02e-128	1	TripleToF	gametophores-4	+	-
Pp3c18_sORF57	NGPATTAATTPPEVVGEFGGKGWRPSS	178.95	7.9574e-147	1	TripleToF	gametophores-2	+	-
Pp3c18_sORF57	GPATTAATTPPEVVGE	181.87	2.1507e-20	1	TripleToF	gametophores-3	+	-
Pp3c18_sORF57	NGPATTAATTPPEVVGEFGGKGWRPSS	189.18	8.2365e-61	8	TripleToF	gametophores-1	+	-
Pp3c18_sORF57	NGPATTAATTPPEVVGE	191.95	1.4886e-51	1	TripleToF	gametophores-2	+	-
Pp3c18_sORF57	NGPATTAATTPPEVVGEFGGKGWRPSS	193.42	7.4786e-68	7	TripleToF	gametophores-1	+	-
Pp3c18_sORF57	NGPATTAATTPPEVVGEFGGKGWRPSS	198.59	3.7599e-173	4	TripleToF	protonema-2	+	-
Pp3c18_sORF57	NGPATTAATTPPEVVGEFGGKGWRPSS	198.68	3.0225e-42	2	Orbitrap	gametophores-2	+	-
Pp3c18_sORF57	NGPATTAATTPPEVVGEFGGKG	204.42	2.0466e-70	1	TripleToF	gametophores-2	+	-
Pp3c18_sORF57	NGPATTAATTPPEVVGEFGGKGWRPSS	205.12	2.8142e-196	3	TripleToF	protonema-4	+	-
Pp3c18_sORF57	NGPATTAATTPPEVVGEFGGKGWRPSS	206.04	3.3265e-265	1	TripleToF	gametophores-4	+	-
Pp3c18_sORF57	NGPATTAATTPPEVVGE	213.63	3.7843e-49	1	Orbitrap	gametophores-2	+	-
Pp3c18_sORF57	NGPATTAATTPPEVVGEFGGKGWRPSS	229.87	6.3436e-144	5	TripleToF	gametophores-2	+	-
Pp3c18_sORF57	NGPATTAATTPPEVVGEFGGKGWRPS	231.29	8.9997e-92	2	Orbitrap	gametophores-2	+	-
Pp3c18_sORF57	NGPATTAATTPPEVVGE	234.87	1.3342e-129	3	TripleToF	gametophores-4	+	-
Pp3c18_sORF57	NGPATTAATTPPEVVGE	246.49	1.5896e-52	6	TripleToF	gametophores-1	+	-
Pp3c18_sORF57	NGPATTAATTPPEVVGE	248.91	1.5795e-195	9	TripleToF	gametophores-3	+	-
Pp3c18_sORF57	NGPATTAATTPPEVVGE	250.13	1.2238e-195	6	TripleToF	gametophores-1	+	-
Pp3c18_sORF57	NGPATTAATTPPEVVGEFGGKG	323.91	0	1	TripleToF	gametophores-2	+	-
Pp3c19_sORF1145	GAGVTGATTDQATVGAIQ	77.64	0.0062101	1	Orbitrap	protoplast-4	+	-
Pp3c2_sORF2729	HLQLALR	77.944	0.0097451	7	Orbitrap	gametophores-3	-	+
Pp3c2_sORF2729	HLQLALR	79.833	0.0091216	1	Orbitrap	protoplasts-1	-	+
Pp3c2_sORF2729	HLQLALR	80.377	0.0081221	1	TripleTOF	gametophores-3	-	+
Pp3c2_sORF2729	HLQLALR	80.555	0.0089867	1	Orbitrap	protonema-2	-	+
Pp3c2_sORF2729	HLQLALR	81.716	0.0087697	6	Orbitrap	gametophores-3	-	+
Pp3c2_sORF2729	HLQLALR	84.025	0.0083384	2	Orbitrap	protoplasts-1	-	+
Pp3c2_sORF2729	HLQLALR	84.359	0.008276	1	Orbitrap	protoplasts-1	-	+
Pp3c2_sORF2729	HLQLALR	93.885	0.006496	2	Orbitrap	protoplasts-1	-	+
Pp3c2_sORF2729	HLQLALR	95.9	0.0061195	2	Orbitrap	protoplasts-2	-	+
Pp3c2_sORF2729	HLQLALR	97.596	0.005894	2	Orbitrap	gametophores-1	-	+
Pp3c2_sORF2729	HLQLALR	100.27	0.0062963	1	Orbitrap	protonema-1	-	+
Pp3c2_sORF2729	HLQLALR	100.27	0.0059006	2	Orbitrap	protoplasts-2	-	+
Pp3c2_sORF2729	HLQLALR	101.33	0.006455	1	Orbitrap	gametophores-1	-	+
Pp3c2_sORF2729	HLQLALR	102.81	0.0060318	8	Orbitrap	gametophores-4	-	+
Pp3c2_sORF2729	HLQLALR	107.55	0.0059006	8	Orbitrap	gametophores-4	-	+
Pp3c2_sORF2729	HLQLALR	107.65	0.0060318	8	Orbitrap	gametophores-4	-	+
Pp3c2_sORF2729	HLQLALR	111.69	0.0062963	2	Orbitrap	protoplasts-2	-	+
Pp3c2_sORF2729	HLQLALR	119.06	0.0059763	8	Orbitrap	gametophores-4	-	+
Pp3c2_sORF2729	HLQLALR	120.76	0.0061195	8	Orbitrap	gametophores-4	-	+
Pp3c20_sORF2107	LPSLLMLNQF	113.7	0.0071582	1	Orbitrap	protoplast-4	+	-
Pp3c20_sORF247	GTAPRELLIPSL	76.827	0.006547	1	Orbitrap	protonema-2	+	-
Pp3c22_sORF43	LDILHAR	77.944	0.0097451	1	Orbitrap	protonema-2	-	+
Pp3c22_sORF43	LDILHAR	79.454	0.0081525	1	TripleTOF	gametophores-3	-	+
Pp3c22_sORF43	LDILHAR	84.025	0.0083384	1	Orbitrap	protonema-2	-	+
Pp3c22_sORF43	LDILHAR	85.061	0.0081447	1	Orbitrap	protonema-2	-	+
Pp3c23_sORF1096	LSIILLNR	97.068	0.00018356	1	TripleToF	gametophores-4	+	-
Pp3c23_sORF19	LSWTTNLSRSQA	76.221	0.0067782	2	Orbitrap	protonema-4	+	-
Pp3c24_sORF1145	SSSANAPLDIVA	79.474	0.0055358	4	Orbitrap	protonema-3	+	-
Pp3c24_sORF1145	SSSANAPLDIVA	91.318	0.0024306	4	Orbitrap	protonema-3	+	-
Pp3c24_sORF1145	SSSANAPLDIVA	92.439	0.0022723	2	Orbitrap	protonema-4	+	-
Pp3c25_sORF1000	WLVQPFDWIKEQITGPKEESK	64.203	0.00013156	1	Orbitrap	protoplast-1	+	-
Pp3c25_sORF1000	WLVQPFDWIKEQITGPKEESK	69.763	0.0049869	1	Orbitrap	protonema-4	+	-
Pp3c25_sORF1000	WLVQPFDWIKEQITGPKEESK	73.294	0.0022986	3	Orbitrap	protonema-4	+	-
Pp3c25_sORF1000	WLVQPFDWIKEQITGPKEESK	74.029	0.00030025	2	Orbitrap	protoplast-1	+	-
Pp3c25_sORF1000	WLVQPFDWIKEQITGPKEESK	74.048	0.0071534	1	Orbitrap	protoplast-4	+	-
Pp3c25_sORF1000	WLVQPFDWIKEQITGPKEESK	74.519	0.0068571	1	Orbitrap	protoplast-4	+	-
Pp3c25_sORF1000	VLWGTTAACGAL	77.282	0.0063729	4	Orbitrap	protonema-2	+	-
Pp3c25_sORF1000	VLWGTTAACGAL	77.282	0.0063729	4	Orbitrap	protonema-4	+	-
Pp3c25_sORF1000	VQSKQGLSLLKFIPK	79.705	0.0089107	1	Orbitrap	protonema-4	+	-
Pp3c25_sORF1000	VQSKQGLSLLKFIPK	79.805	0.0066489	2	TripleToF	protoplast-3	+	-
Pp3c25_sORF1000	VIRPQTSDVSSA	79.974	0.0053449	1	Orbitrap	protonema-4	+	-
Pp3c25_sORF1000	WLVQPFDWIKEQITGPKEESK	80.98	0.0033845	1	Orbitrap	protoplast-2	+	-
Pp3c25_sORF1000	WLVQPFDWIKEQITGPKEESK	82.36	0.00011406	2	Orbitrap	protoplast-1	+	-
Pp3c25_sORF1000	VQSKQGLSLLKFIPK	82.55	0.0096691	1	Orbitrap	protoplast-2	+	-
Pp3c25_sORF1000	VQSKQGLSLLKFIPK	86.378	0.00047205	1	Orbitrap	protonema-4	+	-
Pp3c25_sORF1000	VLWGTTAACGAL	86.833	0.0030637	5	Orbitrap	protonema-4	+	-
Pp3c25_sORF1000	DWIKEQITGPKEESK	87.989	0.0041111	1	Orbitrap	protonema-4	+	-
Pp3c25_sORF1000	VLWGTTAACGAL	89.142	0.0027377	4	Orbitrap	protonema-4	+	-
Pp3c25_sORF1000	VQSKQGLSLLKF	89.189	0.0088714	2	TripleToF	protoplast-3	+	-
Pp3c25_sORF1000	VQSKQGLSLLKFIPK	89.358	0.0059582	1	Orbitrap	protoplast-3	+	-
Pp3c25_sORF1000	VQSKQGLSLLKF	89.46	0.0086025	2	TripleToF	protoplast-3	+	-
Pp3c25_sORF1000	VQSKQGLSLLKFIPK	89.466	0.0058991	1	Orbitrap	protoplast-3	+	-
Pp3c25_sORF1000	VIRPQTSDVSSA	89.913	0.002629	2	Orbitrap	protonema-4	+	-
Pp3c25_sORF1000	WLVQPFDWIKEQITGPKEESK	90.718	0.0015348	1	Orbitrap	protoplast-2	+	-
Pp3c25_sORF1000	VIRPQTSDVSSA	93.325	0.0021473	2	Orbitrap	protonema-4	+	-
Pp3c25_sORF1000	DWIKEQITGPKEESK	93.51	1.7237e-05	1	Orbitrap	protoplast-4	+	-
Pp3c25_sORF1000	VIRPQTSDVSSA	96.143	0.0017495	3	Orbitrap	protonema-4	+	-
Pp3c25_sORF1000	WLVQPFDWIKEQITGPKEESK	96.848	0.00073044	1	Orbitrap	protoplast-4	+	-
Pp3c25_sORF1000	WLVQPFDWIKEQITGPKEESK	97.488	0.00015246	1	Orbitrap	protonema-4	+	-
Pp3c25_sORF1000	WLVQPFDWIKEQITGPKEESK	99.407	0.00015393	4	Orbitrap	protonema-4	+	-
Pp3c25_sORF1000	WLVQPFDWIKEQITGPKEESK	99.409	0.00015389	2	Orbitrap	protonema-4	+	-
Pp3c25_sORF1000	VQSKQGLSLLK	101.89	0.0024393	2	TripleToF	gametophores-1	+	-
Pp3c25_sORF1000	WLVQPFDWIKEQITGPKEESK	102.07	0.00010765	3	Orbitrap	protonema-4	+	-
Pp3c25_sORF1000	DWIKEQITGPKEESK	102.39	3.6964e-09	1	TripleToF	protoplast-3	+	-
Pp3c25_sORF1000	VQSKQGLSLLKF	104.24	0.0045319	1	Orbitrap	protoplast-4	+	-
Pp3c25_sORF1000	VLWGTTAACGAL	105.57	0.0012693	1	Orbitrap	protonema-4	+	-
Pp3c25_sORF1000	VQSKQGLSLLK	106.26	0.0034149	2	TripleToF	gametophores-1	+	-
Pp3c25_sORF1000	WLVQPFDWIKEQITGPKEESK	107.47	8.6114e-08	2	Orbitrap	protoplast-4	+	-
Pp3c25_sORF1000	VIRPQTSDVSSA	108.43	0.0021554	2	TripleToF	protoplast-3	+	-
Pp3c25_sORF1000	VQSKQGLSLLKF	108.72	0.0019144	1	Orbitrap	protoplast-4	+	-
Pp3c25_sORF1000	DWIKEQITGPKEESK	109.35	0.00017406	3	TripleToF	protoplast-3	+	-
Pp3c25_sORF1000	VQSKQGLSLLKF	109.84	0.0033468	1	Orbitrap	protoplast-4	+	-
Pp3c25_sORF1000	DWIKEQITGPKEESK	110.38	0.00016567	4	TripleToF	protoplast-3	+	-
Pp3c25_sORF1000	WLVQPFDWIKEQITGPKEESK	110.67	0.00011589	1	Orbitrap	protoplast-2	+	-
Pp3c25_sORF1000	WLVQPFDWIKEQITGPKEESK	111.38	0.00010964	1	Orbitrap	protoplast-4	+	-
Pp3c25_sORF1000	VIRPQTSDVSSA	112.85	0.0021037	3	TripleToF	protoplast-3	+	-
Pp3c25_sORF1000	VQSKQGLSLLKF	113.07	0.0026514	1	Orbitrap	protoplast-4	+	-
Pp3c25_sORF1000	DWIKEQITGPKEESK	116.96	9.3592e-05	2	Orbitrap	protoplast-4	+	-
Pp3c25_sORF1000	DWIKEQITGPKEESK	117.63	1.4468e-05	1	Orbitrap	protonema-4	+	-
Pp3c25_sORF1000	DWIKEQITGPKEESK	117.7	0.0003454	1	Orbitrap	protoplast-4	+	-
Pp3c25_sORF1000	IPKVIRPQTSDVSSA	118.76	0.00028928	1	Orbitrap	protoplast-4	+	-
Pp3c25_sORF1000	VIRPQTSDVSSA	119.68	0.0012253	1	Orbitrap	protoplast-2	+	-
Pp3c25_sORF1000	VQSKQGLSLLKF	125.74	0.0003415	1	Orbitrap	protoplast-4	+	-
Pp3c25_sORF1000	VQSKQGLSLLKFIPK	125.84	1.3057e-06	1	Orbitrap	protonema-4	+	-
Pp3c25_sORF1000	VLWGTTAACGAL	127.56	0.00061443	1	Orbitrap	protonema-4	+	-
Pp3c25_sORF1000	VLWGTTAACGAL	127.56	0.00061443	2	Orbitrap	protonema-4	+	-
Pp3c25_sORF1000	DWIKEQITGPKEESK	127.66	3.8832e-05	1	TripleToF	protoplast-3	+	-
Pp3c25_sORF1000	VQSKQGLSLLKF	129.54	4.623e-05	2	TripleToF	protoplast-3	+	-
Pp3c25_sORF1000	WLVQPFDWIKEQITGPKEESK	130.05	1.5209e-12	2	Orbitrap	protonema-4	+	-
Pp3c25_sORF1000	WLVQPFDWIKEQITGPKEESK	130.05	8.7072e-17	3	TripleToF	protoplast-3	+	-
Pp3c25_sORF1000	VLWGTTAACGAL	131.06	0.0020012	2	TripleToF	protoplast-1	+	-
Pp3c25_sORF1000	WLVQPFDWIKEQITGPKEESK	132.01	1.3275e-16	3	Orbitrap	protoplast-4	+	-
Pp3c25_sORF1000	VQSKQGLSLLKF	140.48	0.00034108	1	Orbitrap	protoplast-4	+	-
Pp3c25_sORF1000	DWIKEQITGPKEESK	142.54	0.00024699	1	Orbitrap	protoplast-4	+	-
Pp3c25_sORF1000	DWIKEQITGPKEESK	143.88	3.315e-45	1	Orbitrap	protoplast-4	+	-
Pp3c25_sORF1000	DWIKEQITGPKEESK	145.7	0.00011785	1	Orbitrap	protoplast-4	+	-
Pp3c25_sORF1000	WLVQPFDWIKEQITGPKEESK	147.67	3.915e-10	1	Orbitrap	protoplast-4	+	-
Pp3c25_sORF1000	DWIKEQITGPKEESK	150.76	2.6353e-27	1	Orbitrap	protoplast-1	+	-
Pp3c25_sORF1000	VLWGTTAACGAL	153.04	0.00017865	2	TripleToF	protoplast-1	+	-
Pp3c25_sORF1000	VQSKQGLSLLKFIPK	153.81	4.6607e-08	2	Orbitrap	protonema-4	+	-
Pp3c25_sORF1000	VQSKQGLSLLKFIPK	165.86	9.7186e-12	1	Orbitrap	protoplast-4	+	-
Pp3c25_sORF1000	WLVQPFDWIKEQITGPKEESK	166.61	1.1592e-24	4	TripleToF	protoplast-3	+	-
Pp3c25_sORF1000	DWIKEQITGPKEESK	171.73	0.00027476	2	TripleToF	protoplast-3	+	-
Pp3c25_sORF1000	WLVQPFDWIKEQITGPKEESK	175.32	6.0774e-31	3	Orbitrap	protoplast-4	+	-
Pp3c25_sORF1000	DWIKEQITGPKEESK	257.8	2.2773e-92	1	Orbitrap	protoplast-1	+	-
Pp3c25_sORF1253	NHPNPPPNNNRPPSNPPVVR	221.37	1.2873e-101	4	TripleToF	gametophores-1	+	-
Pp3c25_sORF1253	NHPNPPPNNNRPPSNPPVVR	185.28	3.5625e-32	2	TripleToF	gametophores-1	+	-
Pp3c25_sORF1253	NHPNPPPNNNRPPSNPPVVR	202.96	1.1007e-60	2	TripleToF	gametophores-1	+	-
Pp3c25_sORF1253	NHPNPPPNNNRPPSNPPVVR	121.01	5.5247e-05	3	TripleToF	gametophores-1	+	-
Pp3c25_sORF1253	NHPNPPPNNNRPPSNPPVVR	152.89	2.6881e-08	1	TripleToF	gametophores-2	+	-
Pp3c25_sORF1253	NHPNPPPNNNRPPSNPPVVR	169.72	1.3755e-19	1	TripleToF	gametophores-2	+	-
Pp3c25_sORF1253	NHPNPPPNNNRPPSNPPVVRNPS	157.59	1.7773e-15	2	TripleToF	gametophores-2	+	-
Pp3c25_sORF1253	NHPNPPPNNNRPPSNPPVVRNPS	112.56	2.9635e-07	2	TripleToF	gametophores-2	+	-
Pp3c25_sORF1253	NHPNPPPNNNRPPSNPPVVRNPS	109.85	2.5609e-07	1	TripleToF	gametophores-2	+	-
Pp3c25_sORF1253	NHPNPPPNNNRPPSNPPVVRNPSSG	86.211	1.5383e-08	1	TripleToF	gametophores-5	+	-
Pp3c25_sORF1253	NHPNPPPNNNRPPSNPPVVRNPSSG	177.91	5.6245e-40	2	TripleToF	gametophores-1	+	-
Pp3c25_sORF1253	NHPNPPPNNNRPPSNPPVVRNPSSG	140.66	8.042e-14	2	TripleToF	gametophores-1	+	-
Pp3c25_sORF1253	NHPNPPPNNNRPPSNPPVVRNPSSG	121.38	6.1725e-11	3	TripleToF	gametophores-1	+	-
Pp3c25_sORF1253	NHPNPPPNNNRPPSNPPVVRNPSSG	141.36	6.7152e-11	5	TripleToF	gametophores-2	+	-
Pp3c25_sORF1253	NHPNPPPNNNRPPSNPPVVRNPSSG	121.38	6.1725e-11	1	TripleToF	gametophores-2	+	-
Pp3c25_sORF1253	NHPNPPPNNNRPPSNPPVVRNPSSG	141.19	6.8493e-11	2	TripleToF	gametophores-2	+	-
Pp3c26_sORF985	VALGVTFPLDK	81.296	0.0082791	2	Orbitrap	protonema-4	+	-
Pp3c27_sORF501	LSWGESLSTI	95.352	0.0079923	1	Orbitrap	protonema-4	+	-
Pp3c3_sORF1213	GVGKLQKEVAI	69.423	0.0090613	5	Orbitrap	protoplast-1	+	-
Pp3c3_sORF1213	GVGKLQKEVAI	69.825	0.0087908	2	Orbitrap	protoplast-1	+	-
Pp3c3_sORF3786	MISSYPRAPLCCLSR	92.611	0.00039679	1	TripleTOF	protonemata-4	-	+
Pp3c3_sORF507	QESVYLLDCA	145.34	6.0969e-12	1	TripleToF	protonema-3	+	-
Pp3c4_sORF2250	SPSLDRSLPSI	80.688	0.0086252	5	Orbitrap	protonema-2	+	-
Pp3c4_sORF2250	SPSLDRSLPSI	88.136	0.0054062	1	Orbitrap	protonema-4	+	-
Pp3c4_sORF2250	SPSLDRSLPSI	91.265	0.0048033	6	Orbitrap	protonema-4	+	-
Pp3c4_sORF2250	SPSLDRSLPSI	92.838	0.0045003	11	Orbitrap	protonema-2	+	-
Pp3c4_sORF2250	SPSLDRSLPSI	93.178	0.0044347	6	Orbitrap	protonema-4	+	-
Pp3c4_sORF2250	SPSLDRSLPSI	93.598	0.0043539	7	Orbitrap	protonema-4	+	-
Pp3c4_sORF2250	SPSLDRSLPSI	93.649	0.004344	6	Orbitrap	protonema-4	+	-
Pp3c4_sORF2250	SPSLDRSLPSI	96.331	0.0038492	9	Orbitrap	protonema-3	+	-
Pp3c4_sORF2250	SPSLDRSLPSI	96.331	0.0038492	11	Orbitrap	protonema-2	+	-
Pp3c4_sORF2250	SPSLDRSLPSI	96.331	0.0038492	4	Orbitrap	protonema-4	+	-
Pp3c4_sORF2250	SPSLDRSLPSI	96.331	0.0038492	6	Orbitrap	protonema-4	+	-
Pp3c4_sORF2250	SPSLDRSLPSI	96.331	0.0038492	5	Orbitrap	protonema-4	+	-
Pp3c4_sORF2250	SPSLDRSLPSI	96.948	0.0038232	8	Orbitrap	protonema-4	+	-
Pp3c4_sORF2250	SPSLDRSLPSI	99.013	0.003736	6	Orbitrap	protonema-4	+	-
Pp3c4_sORF2250	SPSLDRSLPSI	102.62	0.0035836	7	Orbitrap	protonema-4	+	-
Pp3c4_sORF2250	SPSLDRSLPSI	103.55	0.0071901	1	Orbitrap	protoplast-4	+	-
Pp3c4_sORF2250	SPSLDRSLPSI	104.2	0.0035169	6	Orbitrap	protonema-2	+	-
Pp3c4_sORF2250	SPSLDRSLPSI	104.2	0.003517	6	Orbitrap	protonema-2	+	-
Pp3c4_sORF2250	SPSLDRSLPSI	105.1	0.0034789	4	Orbitrap	protonema-4	+	-
Pp3c4_sORF2250	SPSLDRSLPSI	105.52	0.0034612	8	Orbitrap	protonema-3	+	-
Pp3c4_sORF2250	SPSLDRSLPSI	105.52	0.0034612	7	Orbitrap	protonema-3	+	-
Pp3c4_sORF2250	SPSLDRSLPSI	105.52	0.0034612	6	Orbitrap	protonema-7	+	-
Pp3c4_sORF2250	SPSLDRSLPSI	108.98	0.0029732	4	Orbitrap	protonema-4	+	-
Pp3c4_sORF2250	SPSLDRSLPSI	116.05	0.0031671	1	Orbitrap	protoplast-3	+	-
Pp3c4_sORF2250	SPSLDRSLPSI	120.15	0.0073871	1	Orbitrap	protoplast-4	+	-
Pp3c4_sORF2250	SPSLDRSLPSI	120.87	0.0059812	2	TripleToF	protoplast-3	+	-
Pp3c4_sORF750	RESLRSSHRRVPM	81.95	0.0024856	2	Orbitrap	protonema-2	+	-
Pp3c7_sORF1583	MLTWMVPLR	62.717	0.0030913	1	TripleTOF	gametophores-1	-	+
Pp3c7_sORF2723	SPGILTSSLLL	86.794	0.0056649	4	Orbitrap	protonema-4	+	-
Pp3c7_sORF2723	SPGILTSSLLL	102.72	0.0075421	1	Orbitrap	protoplast-4	+	-
Pp3c8_sORF1113	FKAQLTTLAGIGMN	60.434	0.0094865	1	Orbitrap	gametophores-1	+	-
Pp3c8_sORF1113	FKAQLTTLAGIGMN	61.353	0.0085573	1	Orbitrap	gametophores-1	+	-
Pp3c8_sORF1813	MVNTGTVPSLITSVWTK	73.273	0.00080255	1	TripleTOF	protoplasts-2	-	+
Pp3c8_sORF1813	MVNTGTVPSLITSVWTK	104.87	2.8825e-05	1	TripleTOF	protonemata-2	-	+
Pp3c8_sORF2026	MDQLWIVSK	90.657	0.00050032	1	TripleTOF	gametophores-2	-	+
Pp3c8_sORF2447	TTVLYWISVGQV	90.657	0.0086296	1	Orbitrap	protoplast-4	+	-
Pp3c9_sORF1448	MILTEAEKK	105.12	0.00086216	1	TripleToF	protonema-4	+	-
Pp3c9_sORF1544	FVALPGAILVAY	74.415	0.0076258	3	Orbitrap	protonema-4	+	-
Pp3c9_sORF1544	FVALPGAILVAY	83.614	0.0039543	3	Orbitrap	protonema-4	+	-
Pp3c9_sORF1544	EFVALPGAILVA	96.492	0.0019265	1	Orbitrap	protoplast-4	+	-
Pp3c9_sORF1544	EFVALPGAILVAY	124.98	0.00021047	1	Orbitrap	protoplast-4	+	-
Pp3c9_sORF1544	VQPLLARLASAAEFVALPGAIL	101.38	1.5483e-08	1	TripleToF	gametophores-3	+	-
Pp3c9_sORF1544	VQPLLARLASAAEFVALPGAIL	126.48	2.9304e-13	1	TripleToF	gametophores-3	+	-
Pp3c9_sORF1544	EFVALPGAIL	162.51	0.0013441	2	Orbitrap	protoplast-4	+	-
Pp3c9_sORF1544	EFVALPGAIL	158.08	0.0026474	2	Orbitrap	protoplast-4	+	-
Pp3c9_sORF1544	EFVALPGAIL	148.33	0.0021716	3	TripleToF	protoplast-3	+	-
Pp3c9_sORF1544	EFVALPGAILV	166.17	0.00070039	2	Orbitrap	protoplast-4	+	-
Pp3c9_sORF1544	EFVALPGAILVA	107.9	0.0053535	2	Orbitrap	protoplast-4	+	-
Pp3c9_sORF1544	EFVALPGAILVA	183.9	3.6592e-06	3	Orbitrap	protoplast-4	+	-
Pp3c9_sORF1544	EFVALPGAILVA	155.75	2.8496e-05	2	Orbitrap	protoplast-4	+	-
Pp3c9_sORF1544	EFVALPGAILVA	182.68	2.8496e-05	4	TripleToF	protoplast-3	+	-
Pp3c9_sORF1544	EFVALPGAILVAY	131.06	0.0020181	1	Orbitrap	protoplast-4	+	-
Pp3c9_sORF1544	EFVALPGAILVAY	214.25	2.3125e-17	1	Orbitrap	protoplast-4	+	-
Pp3c9_sORF1544	EFVALPGAILVAY	190.52	2.4698e-10	1	Orbitrap	protoplast-4	+	-
Pp3c9_sORF1544	FVALPGAILVA	118.06	0.0030689	2	Orbitrap	protoplast-4	+	-
Pp3c9_sORF1544	FVALPGAILVA	102.81	0.0067873	4	Orbitrap	protoplast-4	+	-
Pp3c9_sORF1544	FVALPGAILVA	100.82	0.0074047	1	Orbitrap	protoplast-4	+	-
Pp3c9_sORF1544	FVALPGAILVA	102.98	0.0070691	1	TripleToF	protoplast-3	+	-
Pp3c9_sORF1544	FVALPGAILVA	100.82	0.0088217	1	TripleToF	protoplast-3	+	-
Pp3c9_sORF1544	FVALPGAILVA	116.35	0.0033939	7	TripleToF	protoplast-3	+	-
Pp3c9_sORF1544	FVALPGAILVAY	129.29	0.0024634	1	TripleToF	protoplast-1	+	-
Pp3c9_sORF1544	FVALPGAILVAY	112.75	0.007828	2	TripleToF	protoplast-1	+	-
Pp3c9_sORF1544	FVALPGAILVAY	142.11	0.00016855	1	TripleToF	protoplast-1	+	-
Pp3c9_sORF1544	FVALPGAILVAY	110.36	0.0033786	2	Orbitrap	protoplast-4	+	-
Pp3c9_sORF1544	FVALPGAILVAY	135.5	0.0016102	5	Orbitrap	protoplast-4	+	-
Pp3c9_sORF1544	FVALPGAILVAY	128.82	0.0020263	6	TripleToF	protoplast-3	+	-
Pp3c9_sORF1544	VALPGAILVAY	133.99	0.006497	4	Orbitrap	protoplast-4	+	-
