# Supplementary material for: Distinct types of short open reading frames are translated in plant cells
Source: HighWire-hosted journal article supplement (doi:10.1101/gr.253302.119), 2019-08-06
Supplement: Supplemental_Table_S4.xlsx.xlsx [file Supplemental_Table_S4.xlsx.xlsx]

## Sheet: Sheet1
Supplemental Table S4. List of genes with translatable CDS-sORFs for which protein translation was confirmed based on MS analysis.
sORFs	protonemata	protoplasts	gametophores		Protein	protonemata	protoplasts	gametophores
Pp3c1_sORF1909	0	0	1		Pp3c1_30360V3.1	0	1	0
Pp3c7_sORF2723	1	1	0		Pp3c7_1350V3.1	1	1	0
Pp3c10_sORF2639	0	0	1		Pp3c10_14160V3.1	1	1	1
Pp3c11_sORF461	1	0	0		Pp3c11_18980V3.1	0	1	0
Pp3c15_sORF33	1	0	0		Pp3c15_15290V3.1	0	0	1
Pp3c18_sORF1035	1	0	0		Pp3c18_2430V3.1	1	0	1
Pp3c20_sORF247	1	0	0		Pp3c20_16710V3.1	1	0	1
