# Supplementary material for: Distinct types of short open reading frames are translated in plant cells
Source: HighWire-hosted journal article supplement (doi:10.1101/gr.253302.119), 2019-08-06
Supplement: Supplemental_Table_S5.xlsx.xlsx [file Supplemental_Table_S5.xlsx.xlsx]

## Sheet: Sheet1
Supplemental Table S5. Summary of cis-sORFs and trans-sORFs
sORFs	Genes	sORF type	AS event	overlapping with CDS	Protein hits	Start	End	E-value	Database	Domain	Domain -me
Pp3c1_sORF523	ID=XLOC_025820|TCONS_00044170	trans-sORF	-	-	Pp3c8_9251	-	-	-	-	-	-
Pp3c1_sORF701	Pp3c1_20230	cis/trans-sORF	Stop codon excision	TRUE	Pp3c1_20230,Pp3c1_16920,Pp3c2_20240,Pp3c2_22070	1	47	-	MobiDBLite	mobidb-lite	consensus disorder prediction
-	-	-	-	-	-	1	47	-	MobiDBLite	mobidb-lite	consensus disorder prediction
Pp3c1_sORF712	Pp3c1_20290	trans-sORF	-	-	Pp3c2_20350	-	-	-	-	-	-
Pp3c1_sORF882	Pp3c1_21630	cis/trans-sORF	Stop codon excision	TRUE	Pp3c1_21630,Pp3c14_12460	-	-	-	-	-	-
Pp3c1_sORF915	Pp3c1_1940	cis/trans-sORF	Start codon excision	TRUE	Pp3c1_1940,Pp3c22_19310,Pp3c18_9180,Pp3c18_9170,Pp3c2_180,Pp3c2_181,Pp3c22_19230,Pp3c21_60	1	87	0.0043	SMART	SM00915	-
-	-	-	-	-	-	13	86	1.3E-18	Pfam	PF01419	Jacalin-like lectin domain
-	-	-	-	-	-	9	88	5.6E-19	Gene3D	G3DSA:2.100.10.30	-
-	-	-	-	-	-	12	86	4.6E-16	PANTHER	PTHR23244	-
-	-	-	-	-	-	12	86	4.6E-16	PANTHER	PTHR23244:SF378	-
-	-	-	-	-	-	1	89	22.771	ProSiteProfiles	PS51752	Jacalin-type lectin domain profile.
-	-	-	-	-	-	14	86	3.4195E-25	CDD	cd09612	Jacalin
-	-	-	-	-	-	12	86	1.28E-20	SUPERFAMILY	SSF51101	-
-	-	-	-	-	-	1	87	0.0043	SMART	SM00915	-
Pp3c1_sORF1153	Pp3c1_23620	cis/trans-sORF	Start codon excision,Stop codon excision	TRUE	Pp3c1_23680,Pp3c1_23620	12	56	1.6E-6	Gene3D	G3DSA:3.30.420.140	-
-	-	-	-	-	-	15	53	7.4E-13	PANTHER	PTHR33317:SF4	-
-	-	-	-	-	-	15	53	7.4E-13	PANTHER	PTHR33317	-
-	-	-	-	-	-	12	56	1.6E-6	Gene3D	G3DSA:3.30.420.140	-
Pp3c1_sORF1157	Pp3c1_40	trans-sORF	-	-	Pp3c10_50	-	-	-	-	-	-
Pp3c1_sORF1186	ID=XLOC_029589|TCONS_00050640	trans-sORF	-	-	Pp3c1_24020	-	-	-	-	-	-
Pp3c1_sORF1198	Pp3c1_40	trans-sORF	-	-	Pp3c10_50	-	-	-	-	-	-
Pp3c1_sORF1303	Pp3c1_24850	trans-sORF	-	-	Pp3c2_15860	-	-	-	-	-	-
Pp3c1_sORF1504	Pp3c1_26770	trans-sORF	Stop codon excision	TRUE	Pp3c14_9170	-	-	-	-	-	-
Pp3c1_sORF1544	ID=XLOC_012636|TCONS_00021409	trans-sORF	-	-	Pp3c10_7010	-	-	-	-	-	-
Pp3c1_sORF1613	Pp3c1_27900	cis-sORF	Stop codon excision	TRUE	Pp3c1_27900	-	-	-	-	-	-
Pp3c1_sORF1818	Pp3c1_29440	cis/trans-sORF	Start codon excision	TRUE	Pp3c1_29440,Pp3c2_12670	18	47	-	MobiDBLite	mobidb-lite	consensus disorder prediction
-	-	-	-	-	-	18	47	-	MobiDBLite	mobidb-lite	consensus disorder prediction
Pp3c1_sORF1934	Pp3c1_30790	cis-sORF	Stop codon excision	TRUE	Pp3c1_30790	-	-	-	-	-	-
Pp3c1_sORF2005	Pp3c1_31230	cis-sORF	Stop codon excision	TRUE	Pp3c1_31230	-	-	-	-	-	-
Pp3c1_sORF2362	Pp3c1_33410	cis-sORF	Stop codon excision	TRUE	Pp3c1_33410	-	-	-	-	-	-
Pp3c1_sORF2373	Pp3c1_33530	cis/trans-sORF	Start codon excision	TRUE	Pp3c1_33530,Pp3c2_1770,Pp3c14_9980	-	-	-	-	-	-
Pp3c1_sORF2380	Pp3c1_33470	cis-sORF	Stop codon excision	TRUE	Pp3c1_33470	-	-	-	-	-	-
Pp3c1_sORF2423	Pp3c1_33900	trans-sORF	-	-	Pp3c2_2760,Pp3c17_14550	-	-	-	-	-	-
Pp3c1_sORF2608	Pp3c1_35800	trans-sORF	-	-	Pp3c14_21060,Pp3c17_15690,Pp3c17_15560,Pp3c1_30380,Pp3c2_11020,Pp3c25_4390,Pp3c16_17970	-	-	-	-	-	-
Pp3c1_sORF2799	Pp3c1_37240	cis-sORF	Start codon excision	TRUE	Pp3c1_37240	-	-	-	-	-	-
Pp3c1_sORF2813	Pp3c1_37340	cis/trans-sORF	Stop codon excision	TRUE	Pp3c1_37340,Pp3c17_19090,Pp3c14_22340,Pp3c26_8130,Pp3c3_13590,Pp3c11_25160,Pp3c23_12950	3	61	1.2E-12	PANTHER	PTHR19877	-
-	-	-	-	-	-	6	65	12.288	ProSiteProfiles	PS50294	Trp-Asp (WD) repeats circular profile.
-	-	-	-	-	-	6	47	1931-11-01	ProSiteProfiles	PS50082	Trp-Asp (WD) repeats profile.
-	-	-	-	-	-	6	37	0.0059	Pfam	PF00400	WD domain, G-beta repeat
-	-	-	-	-	-	43	61	0.13	Pfam	PF00400	WD domain, G-beta repeat
-	-	-	-	-	-	4	61	1.57E-14	SUPERFAMILY	SSF50978	-
-	-	-	-	-	-	34	64	2.9E-8	Gene3D	G3DSA:1.10.10.670	-
-	-	-	-	-	-	5	33	1.8E-5	Gene3D	G3DSA:2.40.50.140	-
-	-	-	-	-	-	3	61	1.2E-12	PANTHER	PTHR19877	-
Pp3c1_sORF2859	Pp3c1_37630	trans-sORF	Stop codon excision	TRUE	Pp3c2_3190	2	89	3.5E-9	Pfam	PF08161	NUC173 domain
-	-	-	-	-	-	2	89	3.5E-9	Pfam	PF08161	NUC173 domain
Pp3c1_sORF3115	Pp3c1_40030	cis-sORF	Stop codon excision	TRUE	Pp3c1_40030	-	-	-	-	-	-
Pp3c1_sORF3119	Pp3c1_40030	cis/trans-sORF	Start codon excision	TRUE	Pp3c13_21410,Pp3c1_40030	-	-	-	-	-	-
Pp3c1_sORF3723	Pp3c1_6520	cis/trans-sORF	Start codon excision	TRUE	Pp3c1_6520,Pp3c11_7060,Pp3c15_15340	4	42	3.0E-12	PANTHER	PTHR31042	-
-	-	-	-	-	-	4	42	3.0E-12	PANTHER	PTHR31042:SF50	-
-	-	-	-	-	-	4	42	3.0E-12	PANTHER	PTHR31042	-
Pp3c1_sORF3951	Pp3c1_8160	cis-sORF	Start codon excision	TRUE	Pp3c1_8160	1	27	5.0	ProSiteProfiles	PS51257	Prokaryotic membrane lipoprotein lipid attachment site profile.
-	-	-	-	-	-	1	27	5.0	ProSiteProfiles	PS51257	Prokaryotic membrane lipoprotein lipid attachment site profile.
Pp3c1_sORF4030	Pp3c1_8440	trans-sORF	Stop codon excision	TRUE	Pp3c1_8463	-	-	-	-	-	-
Pp3c1_sORF4098	Pp3c1_8930	trans-sORF	-	-	Pp3c19_3730	-	-	-	-	-	-
Pp3c1_sORF4468	Pp3c1_12100	cis-sORF	Stop codon excision	TRUE	Pp3c1_12100	1	24	-	MobiDBLite	mobidb-lite	consensus disorder prediction
-	-	-	-	-	-	1	24	-	MobiDBLite	mobidb-lite	consensus disorder prediction
Pp3c1_sORF4478	ID=XLOC_024415|TCONS_00041760	trans-sORF	-	-	Pp3c2_24980	23	43	-	Coils	Coil	-
-	-	-	-	-	-	8	59	1.2E-12	Pfam	PF16495	SWIRM-associated region 1
Pp3c1_sORF4488	Pp3c1_12560	trans-sORF	-	-	Pp3c2_25380	-	-	-	-	-	-
Pp3c2_sORF108	Pp3c2_15860	cis-sORF	Stop codon excision	TRUE	Pp3c2_15860	-	-	-	-	-	-
Pp3c2_sORF320	Pp3c2_17490	cis-sORF	Stop codon excision	TRUE	Pp3c2_17490	-	-	-	-	-	-
Pp3c2_sORF602	Pp3c2_19585	cis-sORF	Start codon excision,Stop codon excision	TRUE	Pp3c2_19585	-	-	-	-	-	-
Pp3c2_sORF668	Pp3c2_19720	trans-sORF	Start codon excision	TRUE	Pp3c2_19730,Pp3c10_2610	4	33	5.0E-4	Gene3D	G3DSA:1.10.8.60	-
-	-	-	-	-	-	4	33	5.0E-4	Gene3D	G3DSA:1.10.8.60	-
Pp3c2_sORF671	Pp3c2_19730	cis/trans-sORF	Stop codon excision	TRUE	Pp3c2_19730,Pp3c10_2610	8	64	6.3E-9	Gene3D	G3DSA:2.40.40.20	-
-	-	-	-	-	-	9	56	2.61E-6	SUPERFAMILY	SSF50692	-
-	-	-	-	-	-	8	64	6.3E-9	Gene3D	G3DSA:2.40.40.20	-
Pp3c2_sORF744	Pp3c2_20240	cis/trans-sORF	Stop codon excision	TRUE	Pp3c2_20240,Pp3c1_16920,Pp3c1_20230,Pp3c2_22070	1	75	-	MobiDBLite	mobidb-lite	consensus disorder prediction
-	-	-	-	-	-	1	75	-	MobiDBLite	mobidb-lite	consensus disorder prediction
Pp3c2_sORF747	Pp3c2_20240	trans-sORF	-	-	Pp3c13_23290	-	-	-	-	-	-
Pp3c2_sORF776	Pp3c2_20530	cis/trans-sORF	Stop codon excision	TRUE	Pp3c2_20530,Pp3c2_21760	17	50	-	MobiDBLite	mobidb-lite	consensus disorder prediction
-	-	-	-	-	-	17	50	-	MobiDBLite	mobidb-lite	consensus disorder prediction
Pp3c2_sORF950	Pp3c2_22070	trans-sORF	-	-	Pp3c13_23290	-	-	-	-	-	-
Pp3c2_sORF968	Pp3c2_21950	trans-sORF	-	-	Pp3c1_15130	-	-	-	-	-	-
Pp3c2_sORF1072	Pp3c2_23590	cis-sORF	Stop codon excision	TRUE	Pp3c2_23590	-	-	-	-	-	-
Pp3c2_sORF1074	Pp3c2_23590	cis/trans-sORF	Stop codon excision	TRUE	Pp3c2_23590,Pp3c1_16780,Pp3c7_12850,Pp3c11_12080	-	-	-	-	-	-
Pp3c2_sORF1213	Pp3c2_24400	trans-sORF	-	-	Pp3c2_24500,Pp3c7_14330	1	40	3.0E-8	Pfam	PF06351	Allene oxide cyclase
-	-	-	-	-	-	1	40	3.0E-8	Pfam	PF06351	Allene oxide cyclase
Pp3c2_sORF1214	Pp3c2_24400	trans-sORF	-	-	Pp3c2_24500,Pp3c7_14330	9	37	4.32E-5	SUPERFAMILY	SSF141493	-
-	-	-	-	-	-	8	51	1.3E-8	Pfam	PF06351	Allene oxide cyclase
-	-	-	-	-	-	9	37	4.32E-5	SUPERFAMILY	SSF141493	-
Pp3c2_sORF1260	Pp3c2_24840	cis/trans-sORF	Stop codon excision	TRUE	Pp3c2_24840,Pp3c1_12700,Pp3c1_12703	1	26	-	MobiDBLite	mobidb-lite	consensus disorder prediction
-	-	-	-	-	-	1	26	-	MobiDBLite	mobidb-lite	consensus disorder prediction
Pp3c2_sORF1381	Pp3c2_25930	cis/trans-sORF	Stop codon excision	TRUE	Pp3c2_25930,Pp3c1_14380,Pp3c4_30620,Pp3c11_14870,Pp3c11_14880,Pp3c18_17550,Pp3c20_13220,Pp3c4_3440	-	-	-	-	-	-
Pp3c2_sORF1425	Pp3c2_26540	cis/trans-sORF	Stop codon excision	TRUE	Pp3c2_26540,Pp3c2_28200	-	-	-	-	-	-
Pp3c2_sORF1493	Pp3c2_27070	trans-sORF	Start codon excision	TRUE	Pp3c11_3900,Pp3c11_3860,Pp3s51_240	-	-	-	-	-	-
Pp3c2_sORF1494	Pp3c2_27070	trans-sORF	Start codon excision	TRUE	Pp3c11_3900,Pp3c11_3860	-	-	-	-	-	-
Pp3c2_sORF2055	Pp3c2_31290	cis-sORF	Stop codon excision	TRUE	Pp3c2_31290	-	-	-	-	-	-
Pp3c2_sORF2131	Pp3c2_31590	cis-sORF	Stop codon excision	TRUE	Pp3c2_31590	1	25	-	MobiDBLite	mobidb-lite	consensus disorder prediction
-	-	-	-	-	-	1	25	-	MobiDBLite	mobidb-lite	consensus disorder prediction
Pp3c2_sORF2166	Pp3c2_32020	cis-sORF	Excision,Stop codon excision	TRUE	Pp3c2_32020	-	-	-	-	-	-
Pp3c2_sORF2227	Pp3c2_32400	trans-sORF	-	-	Pp3c2_32420	-	-	-	-	-	-
Pp3c2_sORF2241	Pp3c2_32440	cis/trans-sORF	Stop codon excision	TRUE	Pp3c2_32440,Pp3c1_5400	29	57	-	MobiDBLite	mobidb-lite	consensus disorder prediction
-	-	-	-	-	-	29	57	-	MobiDBLite	mobidb-lite	consensus disorder prediction
Pp3c2_sORF2314	Pp3c2_32940	cis-sORF	Stop codon excision	TRUE	Pp3c2_32940	1	23	-	MobiDBLite	mobidb-lite	consensus disorder prediction
-	-	-	-	-	-	1	23	-	MobiDBLite	mobidb-lite	consensus disorder prediction
Pp3c2_sORF2594	Pp3c2_35640	trans-sORF	-	-	Pp3c7_23970	3	69	2.5E-20	PANTHER	PTHR12286	-
-	-	-	-	-	-	3	69	2.5E-20	PANTHER	PTHR12286	-
-	-	-	-	-	-	3	69	2.5E-20	PANTHER	PTHR12286:SF8	-
Pp3c2_sORF2671	Pp3c2_36070	cis-sORF	Start codon excision	TRUE	Pp3c2_36070	-	-	-	-	-	-
Pp3c2_sORF2736	Pp3c2_37160	cis-sORF	Start codon excision	TRUE	Pp3c2_37160	-	-	-	-	-	-
Pp3c2_sORF3175	Pp3c2_6540	cis-sORF	Start codon excision	TRUE	Pp3c2_6540	-	-	-	-	-	-
Pp3c2_sORF3285	Pp3c2_7000	cis-sORF	Stop codon excision	TRUE	Pp3c2_7000	64	83	-	MobiDBLite	mobidb-lite	consensus disorder prediction
-	-	-	-	-	-	64	83	-	MobiDBLite	mobidb-lite	consensus disorder prediction
Pp3c2_sORF3300	Pp3c2_7510	cis/trans-sORF	Stop codon excision	TRUE	Pp3c2_7510,Pp3c1_31050	-	-	-	-	-	-
Pp3c2_sORF3357	Pp3c2_8190	trans-sORF	-	-	Pp3c1_31520	-	-	-	-	-	-
Pp3c2_sORF3434	Pp3c2_40	trans-sORF	-	-	Pp3c5_29220,Pp3s76_20	1	33	5.0	ProSiteProfiles	PS51257	Prokaryotic membrane lipoprotein lipid attachment site profile.
-	-	-	-	-	-	1	33	5.0	ProSiteProfiles	PS51257	Prokaryotic membrane lipoprotein lipid attachment site profile.
Pp3c2_sORF3533	Pp3c2_9440	cis/trans-sORF	Stop codon excision	TRUE	Pp3c2_9440,Pp3c11_5240,Pp3c7_23690	1	38	4.1E-10	Gene3D	G3DSA:1.20.58.400	-
-	-	-	-	-	-	1	58	5.9E-16	PANTHER	PTHR21230	-
-	-	-	-	-	-	1	36	6.8E-11	Pfam	PF05008	Vesicle transport v-S-RE protein N-terminus
-	-	-	-	-	-	1	38	5.41E-9	SUPERFAMILY	SSF47661	-
-	-	-	-	-	-	1	58	5.9E-16	PANTHER	PTHR21230:SF48	-
-	-	-	-	-	-	13	40	-	Coils	Coil	-
-	-	-	-	-	-	1	38	4.1E-10	Gene3D	G3DSA:1.20.58.400	-
Pp3c2_sORF3621	Pp3c2_10200	cis-sORF	Stop codon excision	TRUE	Pp3c2_10200	-	-	-	-	-	-
Pp3c2_sORF3719	Pp3c2_10620	cis-sORF	Stop codon excision	TRUE	Pp3c2_10620	-	-	-	-	-	-
Pp3c2_sORF3887	Pp3c2_11820	cis-sORF	Start codon excision	TRUE	Pp3c2_11820	-	-	-	-	-	-
Pp3c2_sORF3966	Pp3c2_12670	cis/trans-sORF	Start codon excision	TRUE	Pp3c2_12670,Pp3c1_29440	15	47	-	MobiDBLite	mobidb-lite	consensus disorder prediction
-	-	-	-	-	-	15	47	-	MobiDBLite	mobidb-lite	consensus disorder prediction
Pp3c2_sORF4044	ID=XLOC_019203|TCONS_00032754	trans-sORF	-	-	Pp3c11_6870,Pp3c1_30900,Pp3c13_1180,Pp3c11_6700,Pp3c5_15380,Pp3c15_20810,Pp3c17_8770,Pp3c21_60,Pp3c17_20880,Pp3c15_16810,Pp3c18_20820,Pp3c10_2950,Pp3c10_20260	1	52	5.2E-7	SUPERFAMILY	SSF56112	-
-	-	-	-	-	-	2	53	1.8E-4	Pfam	PF07714	Protein tyrosine ki-se
-	-	-	-	-	-	1	56	6.8E-8	Gene3D	G3DSA:1.10.510.10	-
Pp3c2_sORF4078	Pp3c2_13540	cis-sORF	Stop codon excision	TRUE	Pp3c2_13540	-	-	-	-	-	-
Pp3c3_sORF101	Pp3c3_14470	cis-sORF	Stop codon excision	TRUE	Pp3c3_14470	1	50	-	MobiDBLite	mobidb-lite	consensus disorder prediction
-	-	-	-	-	-	1	50	-	MobiDBLite	mobidb-lite	consensus disorder prediction
Pp3c3_sORF162	Pp3c3_15480	cis/trans-sORF	Start codon excision	TRUE	Pp3c3_15480,Pp3c13_12620	25	83	2.4E-17	PANTHER	PTHR23284:SF5	-
-	-	-	-	-	-	25	83	2.4E-17	PANTHER	PTHR23284	-
-	-	-	-	-	-	67	86	-	MobiDBLite	mobidb-lite	consensus disorder prediction
-	-	-	-	-	-	25	83	2.4E-17	PANTHER	PTHR23284:SF5	-
Pp3c3_sORF203	ID=XLOC_015838|TCONS_00026949	trans-sORF	-	-	Pp3c13_14480,Pp3c4_17500	4	58	2.0E-16	PANTHER	PTHR18866:SF120	-
-	-	-	-	-	-	5	41	7.33E-5	SUPERFAMILY	SSF51230	-
-	-	-	-	-	-	6	41	2.0E-5	Pfam	PF00364	Biotin-requiring enzyme
-	-	-	-	-	-	4	58	2.0E-16	PANTHER	PTHR18866	-
Pp3c3_sORF205	ID=XLOC_015838|TCONS_00026949	trans-sORF	-	-	Pp3c4_17500,Pp3c13_14480	-	-	-	-	-	-
Pp3c3_sORF332	Pp3c3_17030	trans-sORF	-	-	Pp3c4_17270,Pp3c13_16820	1	46	4.9E-4	Gene3D	G3DSA:1.10.287.40	-
-	-	-	-	-	-	1	46	4.9E-4	Gene3D	G3DSA:1.10.287.40	-
Pp3c3_sORF414	Pp3c3_17400	cis/trans-sORF	Start codon excision	TRUE	Pp3c3_17400,Pp3c3_17520,Pp3c13_13940,Pp3c4_17210	-	-	-	-	-	-
Pp3c3_sORF435	Pp3c3_17600	trans-sORF	-	-	Pp3c13_14220	-	-	-	-	-	-
Pp3c3_sORF440	Pp3c3_17610	trans-sORF	-	-	Pp3c13_14220,Pp3c9_8980	1	40	2.0E-7	Gene3D	G3DSA:3.30.70.1180	-
-	-	-	-	-	-	1	31	4.45E-8	SUPERFAMILY	SSF118203	-
-	-	-	-	-	-	1	29	5.0E-7	Pfam	PF03223	V-ATPase subunit C
-	-	-	-	-	-	1	40	2.0E-7	Gene3D	G3DSA:3.30.70.1180	-
Pp3c3_sORF441	Pp3c3_17610	trans-sORF	-	-	Pp3c13_14220	-	-	-	-	-	-
Pp3c3_sORF494	Pp3c3_1460	trans-sORF	-	-	Pp3c3_1260,Pp3c3_1480	-	-	-	-	-	-
Pp3c3_sORF560	Pp3c3_18130	trans-sORF	Stop codon excision	TRUE	Pp3c3_18290	-	-	-	-	-	-
Pp3c3_sORF562	Pp3c3_18190	trans-sORF	-	-	Pp3c1_4270,Pp3c9_1500,Pp3c15_2540,Pp3c17_7890,Pp3c26_10280,Pp3c2_37490,Pp3c2_37350	3	43	1.46E-6	SUPERFAMILY	SSF50129	-
-	-	-	-	-	-	2	43	1.4E-7	Gene3D	G3DSA:3.90.180.10	-
-	-	-	-	-	-	3	43	1.46E-6	SUPERFAMILY	SSF50129	-
Pp3c3_sORF616	Pp3c3_18780	trans-sORF	-	-	Pp3c4_19430,Pp3c4_19440	12	60	3.7E-12	PANTHER	PTHR33103	-
-	-	-	-	-	-	12	60	3.7E-12	PANTHER	PTHR33103:SF16	-
-	-	-	-	-	-	12	60	3.7E-12	PANTHER	PTHR33103	-
Pp3c3_sORF952	Pp3c3_20820	trans-sORF	-	-	Pp3c12_24060,Pp3c10_15520,Pp3c1_24440,Pp3c10_6330	-	-	-	-	-	-
Pp3c3_sORF1228	Pp3c3_2740	cis/trans-sORF	Stop codon excision	TRUE	Pp3c3_2740,Pp3c4_30740,Pp3c12_2120,Pp3c15_1670	1	27	5.0	ProSiteProfiles	PS51257	Prokaryotic membrane lipoprotein lipid attachment site profile.
Pp3c3_sORF1664	Pp3c3_26090	cis-sORF	Start codon excision,Stop codon excision	TRUE	Pp3c3_26090	-	-	-	-	-	-
Pp3c3_sORF1726	Pp3c3_26490	cis/trans-sORF	Stop codon excision	TRUE	Pp3c3_26490,Pp3c4_16190	-	-	-	-	-	-
Pp3c3_sORF1738	Pp3c3_26910	cis-sORF	Stop codon excision	TRUE	Pp3c3_26910	-	-	-	-	-	-
Pp3c3_sORF1872	Pp3c3_28000	cis-sORF	Stop codon excision	TRUE	Pp3c3_28000	-	-	-	-	-	-
Pp3c3_sORF1907	Pp3c3_28050	cis/trans-sORF	Start codon excision	TRUE	Pp3c3_28050,Pp3c12_16880,Pp3c10_18330,Pp3c17_23180,Pp3c14_26410,Pp3c1_40570,Pp3c2_610	10	56	4.6E-16	PANTHER	PTHR15371	-
-	-	-	-	-	-	10	56	4.6E-16	PANTHER	PTHR15371:SF10	-
-	-	-	-	-	-	10	56	4.6E-16	PANTHER	PTHR15371	-
Pp3c3_sORF1916	Pp3c3_28140	cis/trans-sORF	Start codon excision	TRUE	Pp3c3_28140,Pp3c17_23030	-	-	-	-	-	-
Pp3c3_sORF1999	Pp3c3_29200	cis-sORF	Stop codon excision	TRUE	Pp3c3_29200	10	71	1.8E-25	PANTHER	PTHR22761:SF22	-
-	-	-	-	-	-	10	71	1.8E-25	PANTHER	PTHR22761	-
-	-	-	-	-	-	10	71	1.8E-25	PANTHER	PTHR22761:SF22	-
Pp3c3_sORF2072	Pp3c3_30180	trans-sORF	Stop codon excision	FALSE	Pp3c23_380,Pp3c3_37150,Pp3c8_2850,Pp3c4_21250,Pp3c13_8600,Pp3c12_9050,Pp3c4_6640,Pp3c12_23460,Pp3c3_11340,Pp3c18_430,Pp3c21_22300,Pp3c22_14660,Pp3c18_5160,Pp3c21_15710,Pp3c22_23030,Pp3c19_13350,Pp3c19_12750,Pp3c18_6550,Pp3c18_1170	16	66	5.0E-8	Pfam	PF05637	galactosyl transferase GMA12/MNN10 family
-	-	-	-	-	-	15	66	3.8E-25	PANTHER	PTHR31311	-
-	-	-	-	-	-	16	66	5.0E-8	Pfam	PF05637	galactosyl transferase GMA12/MNN10 family
Pp3c3_sORF2076	Pp3c3_30210	cis-sORF	Stop codon excision	TRUE	Pp3c3_30210	-	-	-	-	-	-
Pp3c3_sORF2105	Pp3c3_30260	cis-sORF	Stop codon excision	TRUE	Pp3c3_30260	38	86	1.35E-7	SUPERFAMILY	SSF51445	-
-	-	-	-	-	-	14	87	5.3E-19	PANTHER	PTHR10030:SF32	-
-	-	-	-	-	-	14	87	5.3E-19	PANTHER	PTHR10030	-
-	-	-	-	-	-	41	89	1.7E-6	Gene3D	G3DSA:3.20.20.80	-
-	-	-	-	-	-	38	86	1.35E-7	SUPERFAMILY	SSF51445	-
Pp3c3_sORF2289	Pp3c3_31260	cis-sORF	Excision,Stop codon excision	TRUE	Pp3c3_31260	-	-	-	-	-	-
Pp3c3_sORF2303	Pp3c3_31480	trans-sORF	Stop codon excision	TRUE	Pp3c8_7320	1	41	17.072	ProSiteProfiles	PS51553	GMP synthetase ATP pyrophosphatase (GMPS ATP-PPase) domain profile.
-	-	-	-	-	-	1	41	17.072	ProSiteProfiles	PS51553	GMP synthetase ATP pyrophosphatase (GMPS ATP-PPase) domain profile.
Pp3c3_sORF2373	Pp3c3_31860	cis/trans-sORF	Stop codon excision	TRUE	Pp3c3_31860,Pp3c4_3090	-	-	-	-	-	-
Pp3c3_sORF2431	ID=XLOC_011180|TCONS_00018983	trans-sORF	-	-	Pp3c3_32210	-	-	-	-	-	-
Pp3c3_sORF2482	Pp3c3_32590	trans-sORF	Stop codon excision	TRUE	Pp3c4_6720,Pp3c4_6722,Pp3c12_13580,Pp3c8_4020,Pp3c25_14180,Pp3c16_3920,Pp3c12_5640,Pp3c8_14230,Pp3c4_19000,Pp3c20_23170,Pp3c3_25480,Pp3c4_11930,Pp3c24_430,Pp3c10_25270,Pp3c25_6580,Pp3c18_2470,Pp3c3_26770,Pp3c12_5760	2	52	6.22E-13	SUPERFAMILY	SSF54236	-
-	-	-	-	-	-	1	52	13.772	ProSiteProfiles	PS50053	Ubiquitin domain profile.
-	-	-	-	-	-	1	56	7.0E-13	Gene3D	G3DSA:3.10.20.90	-
-	-	-	-	-	-	1	53	1.6E-13	Pfam	PF00240	Ubiquitin family
-	-	-	-	-	-	2	52	6.22E-13	SUPERFAMILY	SSF54236	-
Pp3c3_sORF2879	Pp3c3_35949	trans-sORF	-	-	Pp3c18_17550,Pp3c4_3450,Pp3c1_14380,Pp3c20_13220,Pp3c4_3440,Pp3c4_30620	15	42	5.7E-6	Pfam	PF05512	AWPM-19-like family
-	-	-	-	-	-	15	42	5.7E-6	Pfam	PF05512	AWPM-19-like family
Pp3c3_sORF2920	Pp3c3_36440	cis/trans-sORF	Stop codon excision	TRUE	Pp3c3_36440,Pp3c11_14630,Pp3c1_12860,Pp3c8_3800	50	92	0.008	ProDom	PD001295	RIBOSOMAL S17 30S RIBONUCLEOPROTEIN RR--BINDING R--BINDING 40S S11 S17P S11
-	-	-	-	-	-	50	92	0.008	ProDom	PD001295	RIBOSOMAL S17 30S RIBONUCLEOPROTEIN RR--BINDING R--BINDING 40S S11 S17P S11
Pp3c3_sORF2952	Pp3c3_36620	trans-sORF	-	-	Pp3c4_8060	-	-	-	-	-	-
Pp3c3_sORF3021	Pp3c3_37200	trans-sORF	Stop codon excision	TRUE	Pp3c3_37220,Pp3c8_2940,Pp3c8_2930	1	21	-	MobiDBLite	mobidb-lite	consensus disorder prediction
-	-	-	-	-	-	1	21	-	MobiDBLite	mobidb-lite	consensus disorder prediction
Pp3c3_sORF3051	Pp3c3_37320	trans-sORF	Start codon excision,Stop codon excision	TRUE	Pp3c3_37310	-	-	-	-	-	-
Pp3c3_sORF3052	Pp3c3_37320	trans-sORF	Start codon excision	TRUE	Pp3c3_37310	-	-	-	-	-	-
Pp3c3_sORF3459	Pp3c3_211	trans-sORF	-	-	Pp3c8_25561,Pp3c3_38210	-	-	-	-	-	-
Pp3c3_sORF3467	Pp3c3_7350	trans-sORF	-	-	Pp3c4_16750	-	-	-	-	-	-
Pp3c3_sORF3468	Pp3c3_7350	trans-sORF	-	-	Pp3c4_16750	1	38	-	MobiDBLite	mobidb-lite	consensus disorder prediction
-	-	-	-	-	-	1	38	-	MobiDBLite	mobidb-lite	consensus disorder prediction
Pp3c4_sORF37	Pp3c4_14320	trans-sORF	-	-	Pp3c3_16620,Pp3c14_1480,Pp3c14_1501,Pp3c11_7980,Pp3c19_18250,Pp3c3_8110,Pp3c3_8130,Pp3c3_8090,Pp3c3_8150,Pp3c16_5010,Pp3c16_5060,Pp3c16_4900,Pp3c12_19450,Pp3c9_16700,Pp3c24_9670	-	-	-	-	-	-
Pp3c4_sORF49	Pp3c4_14420	trans-sORF	-	-	Pp3c12_18980,Pp3c10_17680,Pp3c1_32280,Pp3c22_15430,Pp3c11_4980,Pp3c6_27160,Pp3c6_24150,Pp3c7_6420,Pp3c5_6120,Pp3c24_9660,Pp3c24_16740	19	53	9.8E-16	PANTHER	PTHR11071:SF339	-
-	-	-	-	-	-	19	53	9.8E-16	PANTHER	PTHR11071	-
-	-	-	-	-	-	7	55	2.1E-10	Gene3D	G3DSA:2.40.100.10	-
-	-	-	-	-	-	16	55	3.65E-11	SUPERFAMILY	SSF50891	-
-	-	-	-	-	-	19	53	9.8E-16	PANTHER	PTHR11071:SF339	-
Pp3c4_sORF114	Pp3c4_14860	trans-sORF	-	-	Pp3c17_18350	-	-	-	-	-	-
Pp3c4_sORF124	Pp3c4_14860	cis/trans-sORF	Stop codon excision	TRUE	Pp3c4_14860,Pp3c3_14330,Pp3c7_14360,Pp3c1_13060,Pp3c2_24620,Pp3c7_14540,Pp3c11_15920,Pp3c26_9330,Pp3c3_28310	-	-	-	-	-	-
Pp3c4_sORF221	Pp3c4_15840	trans-sORF	Stop codon excision	TRUE	Pp3c12_5080,Pp3c3_22800	-	-	-	-	-	-
Pp3c4_sORF223	Pp3c4_1850	cis-sORF	Stop codon excision	TRUE	Pp3c4_1850	1	50	-	MobiDBLite	mobidb-lite	consensus disorder prediction
Pp3c4_sORF297	Pp3c4_15860	cis-sORF	Stop codon excision	TRUE	Pp3c4_15860	-	-	-	-	-	-
Pp3c4_sORF342	Pp3c4_16520	cis-sORF	Stop codon excision	TRUE	Pp3c4_16520	-	-	-	-	-	-
Pp3c4_sORF357	Pp3c4_16220	cis-sORF	Start codon excision,Stop codon excision	TRUE	Pp3c4_16220	1	72	2.2E-5	Gene3D	G3DSA:1.25.10.10	-
-	-	-	-	-	-	2	59	5.2E-16	PANTHER	PTHR16216	-
-	-	-	-	-	-	2	59	5.2E-16	PANTHER	PTHR16216:SF8	-
-	-	-	-	-	-	1	72	2.2E-5	Gene3D	G3DSA:1.25.10.10	-
Pp3c4_sORF507	Pp3c4_17250	cis-sORF	Stop codon excision	TRUE	Pp3c4_17250	-	-	-	-	-	-
Pp3c4_sORF658	Pp3c4_18170	trans-sORF	-	-	Pp3c13_14730	-	-	-	-	-	-
Pp3c4_sORF666	Pp3c4_18360	cis/trans-sORF	Stop codon excision	TRUE	Pp3c4_18360,Pp3c4_18780,Pp3c4_18510	-	-	-	-	-	-
Pp3c4_sORF815	Pp3c4_20310	trans-sORF	-	-	Pp3c12_6750,Pp3c4_18939,Pp3c4_11030	20	37	-	ProSitePatterns	PS00196	Type-1 copper (blue) proteins sig-ture.
-	-	-	-	-	-	12	83	5.7E-17	PANTHER	PTHR33021:SF92	-
-	-	-	-	-	-	4	46	2.8E-8	Gene3D	G3DSA:2.60.40.420	-
-	-	-	-	-	-	1	45	14.139	ProSiteProfiles	PS51485	Phytocyanin domain profile.
-	-	-	-	-	-	21	41	-	ProSitePatterns	PS00079	Multicopper oxidases sig-ture 1.
-	-	-	-	-	-	13	43	1.57E-8	SUPERFAMILY	SSF49503	-
-	-	-	-	-	-	12	83	5.7E-17	PANTHER	PTHR33021	-
-	-	-	-	-	-	48	69	-	MobiDBLite	mobidb-lite	consensus disorder prediction
-	-	-	-	-	-	15	41	0.001	ProDom	PD003122	COPPER METAL-BINDING BLUE ELECTRON COPPER-BINDING PRECURSOR PHYTOCYANIN SIG-L GLYCOPROTEIN EARLY
-	-	-	-	-	-	20	37	-	ProSitePatterns	PS00196	Type-1 copper (blue) proteins sig-ture.
Pp3c4_sORF918	Pp3c4_1860	cis-sORF	Stop codon excision	TRUE	Pp3c4_1860	-	-	-	-	-	-
Pp3c4_sORF1115	Pp3c4_23120	cis/trans-sORF	Stop codon excision	TRUE	Pp3c4_23120,Pp3c26_3830	-	-	-	-	-	-
Pp3c4_sORF1140	Pp3c4_23540	cis-sORF	Stop codon excision	TRUE	Pp3c4_23540	-	-	-	-	-	-
Pp3c4_sORF1497	ID=XLOC_002509|TCONS_00004234	trans-sORF	-	-	Pp3c25_3928	-	-	-	-	-	-
Pp3c4_sORF1520	Pp3c4_27270	cis-sORF	Excision,Stop codon excision	TRUE	Pp3c4_27270	-	-	-	-	-	-
Pp3c4_sORF1623	Pp3c4_28110	cis-sORF	Start codon excision,Stop codon excision	TRUE	Pp3c4_28110	-	-	-	-	-	-
Pp3c4_sORF1724	Pp3c4_29360	trans-sORF	-	-	Pp3c11_4360,Pp3c1_36530,Pp3c18_10040,Pp3c19_18770,Pp3c12_13910,Pp3c5_21720,Pp3c5_21722,Pp3c12_23260,Pp3c14_17710,Pp3c17_20710,Pp3c3_35680,Pp3c2_5260,Pp3c2_4520	5	96	4.0E-24	PANTHER	PTHR10795	-
-	-	-	-	-	-	8	90	2.13E-8	SUPERFAMILY	SSF52743	-
-	-	-	-	-	-	5	35	7.2E-5	Pfam	PF05922	Peptidase inhibitor I9
-	-	-	-	-	-	5	96	4.0E-24	PANTHER	PTHR10795:SF498	-
-	-	-	-	-	-	2	38	1.9E-7	Gene3D	G3DSA:3.30.70.80	-
-	-	-	-	-	-	46	97	3.5E-7	Gene3D	G3DSA:3.40.50.200	-
-	-	-	-	-	-	5	96	4.0E-24	PANTHER	PTHR10795	-
Pp3c4_sORF1726	Pp3c4_29360	trans-sORF	-	-	Pp3c11_4360	-	-	-	-	-	-
Pp3c4_sORF1771	Pp3c4_29750	cis-sORF	Stop codon excision	TRUE	Pp3c4_29750	1	89	-	MobiDBLite	mobidb-lite	consensus disorder prediction
-	-	-	-	-	-	1	89	-	MobiDBLite	mobidb-lite	consensus disorder prediction
Pp3c4_sORF1835	Pp3c4_30400	trans-sORF	Stop codon excision	TRUE	Pp3c22_1030,Pp3c10_15970,Pp3c6_19080,Pp3c22_5030	3	91	4.07E-14	SUPERFAMILY	SSF52540	-
-	-	-	-	-	-	2	83	1.1E-17	PANTHER	PTHR11017:SF193	-
-	-	-	-	-	-	4	85	1.3E-7	Pfam	PF00931	NB-ARC domain
-	-	-	-	-	-	2	97	2.8E-11	Gene3D	G3DSA:1.10.20.10	-
-	-	-	-	-	-	2	83	1.1E-17	PANTHER	PTHR11017	-
-	-	-	-	-	-	3	91	4.07E-14	SUPERFAMILY	SSF52540	-
Pp3c4_sORF1899	Pp3c4_31330	cis/trans-sORF	Stop codon excision	TRUE	Pp3c4_31330,Pp3c3_10020	-	-	-	-	-	-
Pp3c4_sORF1967	Pp3c4_32180	cis-sORF	Stop codon excision	TRUE	Pp3c4_32180	-	-	-	-	-	-
Pp3c4_sORF2222	Pp3c4_5290	cis-sORF	Stop codon excision	TRUE	Pp3c4_5290	-	-	-	-	-	-
Pp3c4_sORF2251	Pp3c4_180	trans-sORF	Start codon excision	TRUE	Pp3c4_190	15	69	1.7E-13	PANTHER	PTHR31497	-
-	-	-	-	-	-	15	69	1.7E-13	PANTHER	PTHR31497:SF4	-
-	-	-	-	-	-	15	69	1.7E-13	PANTHER	PTHR31497	-
Pp3c4_sORF2310	Pp3c4_270	trans-sORF	-	-	Pp3c12_22830,Pp3c24_15420	-	-	-	-	-	-
Pp3c4_sORF2330	Pp3c4_6770	cis-sORF	Start codon excision	TRUE	Pp3c4_6770	-	-	-	-	-	-
Pp3c4_sORF2574	Pp3c4_8090	trans-sORF	-	-	Pp3c13_16630,Pp3c10_7340,Pp3c3_21140	21	85	2.2E-24	PANTHER	PTHR42893	-
-	-	-	-	-	-	21	85	2.2E-24	PANTHER	PTHR42893:SF3	-
-	-	-	-	-	-	21	85	2.2E-24	PANTHER	PTHR42893	-
Pp3c4_sORF2788	Pp3c4_10497	cis/trans-sORF	Stop codon excision	TRUE	Pp3c4_10480,Pp3c4_10497	-	-	-	-	-	-
Pp3c4_sORF2917	Pp3c4_11630	trans-sORF	-	-	Pp3c12_18160	1	37	7.1E-13	Pfam	PF00705	Proliferating cell nuclear antigen, N-termi-l domain
-	-	-	-	-	-	1	37	4.08E-9	SUPERFAMILY	SSF55979	-
-	-	-	-	-	-	1	44	8.5E-6	Gene3D	G3DSA:3.70.10.10	-
-	-	-	-	-	-	1	37	7.1E-13	Pfam	PF00705	Proliferating cell nuclear antigen, N-termi-l domain
Pp3c4_sORF2960	Pp3c4_12320	trans-sORF	Stop codon excision	TRUE	Pp3c4_12350	54	80	-	MobiDBLite	mobidb-lite	consensus disorder prediction
-	-	-	-	-	-	54	80	-	MobiDBLite	mobidb-lite	consensus disorder prediction
Pp3c5_sORF68	Pp3c5_14600	trans-sORF	-	-	Pp3c27_1870,Pp3c5_13340,Pp3c6_13220	44	84	1.6E-16	PANTHER	PTHR34278	-
-	-	-	-	-	-	44	84	1.6E-16	PANTHER	PTHR34278	-
Pp3c5_sORF175	Pp3c5_15520	cis/trans-sORF	Stop codon excision	TRUE	Pp3c5_15520,Pp3c16_8560	-	-	-	-	-	-
Pp3c5_sORF207	Pp3c5_15600	cis-sORF	Stop codon excision	TRUE	Pp3c5_15600	1	53	-	MobiDBLite	mobidb-lite	consensus disorder prediction
-	-	-	-	-	-	1	53	-	MobiDBLite	mobidb-lite	consensus disorder prediction
Pp3c5_sORF370	Pp3c5_16650	trans-sORF	-	-	Pp3c21_12020,Pp3c18_8290,Pp3c5_6990,Pp3c11_12270,Pp3c7_14180	4	82	1.1E-14	PANTHER	PTHR10663:SF268	-
-	-	-	-	-	-	4	82	1.1E-14	PANTHER	PTHR10663	-
-	-	-	-	-	-	1	40	3.5E-6	Pfam	PF09324	Domain of unknown function (DUF1981)
-	-	-	-	-	-	1	83	4.7E-5	Gene3D	G3DSA:1.25.10.10	-
-	-	-	-	-	-	4	82	1.1E-14	PANTHER	PTHR10663:SF268	-
Pp3c5_sORF430	Pp3c5_16890	cis/trans-sORF	Stop codon excision	TRUE	Pp3c5_16890,Pp3c2_18130,Pp3c1_19370,Pp3c23_10050,Pp3c23_10052,Pp3c20_16460	1	39	1.4E-17	PANTHER	PTHR33621	-
-	-	-	-	-	-	1	37	1.1E-4	Gene3D	G3DSA:1.10.720.30	-
-	-	-	-	-	-	1	39	1.4E-17	PANTHER	PTHR33621	-
Pp3c5_sORF544	Pp3c5_18490	cis/trans-sORF	Stop codon excision	TRUE	Pp3c5_18490,Pp3c16_17730	-	-	-	-	-	-
Pp3c5_sORF607	Pp3c5_19300	cis/trans-sORF	Start codon excision,Stop codon excision	TRUE	Pp3c5_19300,Pp3c16_17910,Pp3c15_23370,Pp3c9_19280,Pp3c3_29170	20	40	1.2E-5	Pfam	PF00403	Heavy-metal-associated domain
-	-	-	-	-	-	11	39	3.8E-6	SUPERFAMILY	SSF55008	-
-	-	-	-	-	-	11	41	1.1E-7	Gene3D	G3DSA:3.30.70.100	-
-	-	-	-	-	-	21	39	0.00111397	CDD	cd00371	HMA
-	-	-	-	-	-	20	40	1.2E-5	Pfam	PF00403	Heavy-metal-associated domain
Pp3c5_sORF617	Pp3c5_19500	cis-sORF	Excision,Stop codon excision	TRUE	Pp3c5_19500	-	-	-	-	-	-
Pp3c5_sORF834	Pp3c5_20480	cis/trans-sORF	Stop codon excision	TRUE	Pp3c5_20480,Pp3c25_3070	-	-	-	-	-	-
Pp3c5_sORF848	Pp3c5_20560	trans-sORF	-	-	Pp3c6_8660	-	-	-	-	-	-
Pp3c5_sORF895	Pp3c5_20980	cis/trans-sORF	Stop codon excision	TRUE	Pp3c5_20980,Pp3c6_10890	39	63	-	MobiDBLite	mobidb-lite	consensus disorder prediction
-	-	-	-	-	-	39	63	-	MobiDBLite	mobidb-lite	consensus disorder prediction
Pp3c5_sORF999	Pp3c5_21897	cis/trans-sORF	Stop codon excision	TRUE	Pp3c5_21897,Pp3c5_21890,Pp3c6_5840	42	67	-	MobiDBLite	mobidb-lite	consensus disorder prediction
-	-	-	-	-	-	42	67	-	MobiDBLite	mobidb-lite	consensus disorder prediction
Pp3c5_sORF1003	Pp3c5_21897	cis-sORF	Stop codon excision	TRUE	Pp3c5_21897	-	-	-	-	-	-
Pp3c5_sORF1034	Pp3c5_22060	cis-sORF	Start codon excision	TRUE	Pp3c5_22060	1	65	1.8E-5	Gene3D	G3DSA:3.40.30.10	-
-	-	-	-	-	-	1	65	1.8E-5	Gene3D	G3DSA:3.40.30.10	-
Pp3c5_sORF1100	Pp3c5_22980	trans-sORF	-	-	Pp3c5_22540	1	33	1.41E-7	SUPERFAMILY	SSF56059	-
-	-	-	-	-	-	1	33	1.41E-7	SUPERFAMILY	SSF56059	-
Pp3c5_sORF1227	Pp3c5_24100	cis-sORF	Start codon excision	TRUE	Pp3c5_24100	-	-	-	-	-	-
Pp3c5_sORF1449	Pp3c5_25710	cis/trans-sORF	Stop codon excision	TRUE	Pp3c5_25710,Pp3c25_13080,Pp3c20_1870	-	-	-	-	-	-
Pp3c5_sORF1475	Pp3c5_26280	cis-sORF	Start codon excision,Stop codon excision	TRUE	Pp3c5_26280	20	65	6.0E-17	PANTHER	PTHR12497:SF4	-
-	-	-	-	-	-	20	65	6.0E-17	PANTHER	PTHR12497	-
-	-	-	-	-	-	12	31	3.4E-9	PRINTS	PR00979	Tafazzin sig-ture
-	-	-	-	-	-	56	65	3.4E-9	PRINTS	PR00979	Tafazzin sig-ture
-	-	-	-	-	-	42	53	3.4E-9	PRINTS	PR00979	Tafazzin sig-ture
-	-	-	-	-	-	20	65	6.0E-17	PANTHER	PTHR12497:SF4	-
Pp3c5_sORF1568	Pp3c5_2740	trans-sORF	-	-	Pp3c10_13280,Pp3c12_5070,Pp3c1_14540	4	91	3.4E-13	Gene3D	G3DSA:3.20.20.100	-
-	-	-	-	-	-	5	89	5.4E-14	PANTHER	PTHR11732:SF306	-
-	-	-	-	-	-	5	89	5.4E-14	PANTHER	PTHR11732	-
-	-	-	-	-	-	15	74	1.96E-10	SUPERFAMILY	SSF51430	-
-	-	-	-	-	-	4	91	3.4E-13	Gene3D	G3DSA:3.20.20.100	-
Pp3c5_sORF1710	Pp3c5_29220	cis/trans-sORF	Truncation	TRUE	Pp3c5_29220,Pp3s76_20,Pp3c6_30010	1	33	5.0	ProSiteProfiles	PS51257	Prokaryotic membrane lipoprotein lipid attachment site profile.
Pp3c5_sORF1785	Pp3c5_3550	cis/trans-sORF	Excision,Stop codon excision	TRUE	Pp3c5_3550,Pp3c6_19540	-	-	-	-	-	-
Pp3c5_sORF1848	Pp3c5_40	trans-sORF	-	-	Pp3c14_26100,Pp3c17_22380	1	45	-	MobiDBLite	mobidb-lite	consensus disorder prediction
-	-	-	-	-	-	1	45	-	MobiDBLite	mobidb-lite	consensus disorder prediction
Pp3c5_sORF2021	Pp3c5_5140	trans-sORF	-	-	Pp3c22_17370	-	-	-	-	-	-
Pp3c5_sORF2246	Pp3c5_7340	trans-sORF	-	-	Pp3c12_25250	-	-	-	-	-	-
Pp3c5_sORF2594	Pp3c5_10620	cis/trans-sORF	Stop codon excision	TRUE	Pp3c5_10620,Pp3c16_15440	1	70	-	MobiDBLite	mobidb-lite	consensus disorder prediction
-	-	-	-	-	-	1	70	-	MobiDBLite	mobidb-lite	consensus disorder prediction
Pp3c6_sORF9	Pp3c6_15790	trans-sORF	-	-	Pp3c20_8890	-	-	-	-	-	-
Pp3c6_sORF81	Pp3c6_16360	cis/trans-sORF	Stop codon excision	TRUE	Pp3c6_16360,Pp3c6_15470,Pp3c5_17270	15	53	-	MobiDBLite	mobidb-lite	consensus disorder prediction
-	-	-	-	-	-	15	53	-	MobiDBLite	mobidb-lite	consensus disorder prediction
Pp3c6_sORF152	Pp3c6_16980	cis-sORF	Stop codon excision	TRUE	Pp3c6_16980	-	-	-	-	-	-
Pp3c6_sORF314	Pp3c6_1850	trans-sORF	-	-	Pp3c16_20890,Pp3c26_9010,Pp3c2_1380,Pp3c1_6260,Pp3c12_18470,Pp3c11_4850,Pp3c27_6100,Pp3c24_8200,Pp3c5_19530,Pp3c10_10730,Pp3c16_5590,Pp3c6_10100,Pp3c20_16410,Pp3c14_15170	2	91	1.33E-34	SUPERFAMILY	SSF53756	-
-	-	-	-	-	-	1	88	7.0E-33	PANTHER	PTHR11926	-
-	-	-	-	-	-	38	81	-	ProSitePatterns	PS00375	UDP-glycosyltransferases sig-ture.
-	-	-	-	-	-	1	88	7.0E-33	PANTHER	PTHR11926:SF524	-
-	-	-	-	-	-	1	91	2.4E-28	Gene3D	G3DSA:3.40.50.2000	-
-	-	-	-	-	-	33	89	1.6E-19	Pfam	PF00201	UDP-glucoronosyl and UDP-glucosyl transferase
-	-	-	-	-	-	2	91	1.33E-34	SUPERFAMILY	SSF53756	-
Pp3c6_sORF465	Pp3c6_19550	cis-sORF	Start codon excision	TRUE	Pp3c6_19550	-	-	-	-	-	-
Pp3c6_sORF576	Pp3c6_20220	cis/trans-sORF	Start codon excision	TRUE	Pp3c6_20220,Pp3c1_8240	-	-	-	-	-	-
Pp3c6_sORF828	Pp3c6_22700	cis-sORF	Stop codon excision	TRUE	Pp3c6_22700	1	61	1.4E-4	Gene3D	G3DSA:3.40.50.1240	-
-	-	-	-	-	-	1	61	1.4E-4	Gene3D	G3DSA:3.40.50.1240	-
Pp3c6_sORF996	Pp3c6_24560	cis-sORF	Start codon excision	TRUE	Pp3c6_24560	-	-	-	-	-	-
Pp3c6_sORF1334	Pp3c6_27300	cis-sORF	Excision,Start codon excision,Stop codon excision	TRUE	Pp3c6_27300	-	-	-	-	-	-
Pp3c6_sORF1558	Pp3c6_3370	cis/trans-sORF	Stop codon excision	TRUE	Pp3c6_3370,Pp3c5_26400,Pp3c5_26980	1	65	9.6E-22	PANTHER	PTHR11236:SF27	-
-	-	-	-	-	-	1	66	7.7E-14	Gene3D	G3DSA:3.60.120.10	-
-	-	-	-	-	-	1	42	1.6E-9	Pfam	PF00425	chorismate binding enzyme
-	-	-	-	-	-	1	40	1.96E-12	SUPERFAMILY	SSF56322	-
-	-	-	-	-	-	25	39	5.7E-8	PRINTS	PR00095	Anthranilate synthase component I sig-ture
-	-	-	-	-	-	10	24	5.7E-8	PRINTS	PR00095	Anthranilate synthase component I sig-ture
-	-	-	-	-	-	1	65	9.6E-22	PANTHER	PTHR11236	-
-	-	-	-	-	-	1	65	9.6E-22	PANTHER	PTHR11236:SF27	-
Pp3c6_sORF1570	Pp3c6_3390	trans-sORF	-	-	Pp3c5_26930	-	-	-	-	-	-
Pp3c6_sORF1641	Pp3c6_3920	trans-sORF	Stop codon excision	TRUE	Pp3c5_24720,Pp3c3_2450,Pp3c13_6400,Pp3c20_13470,Pp3c23_16170,Pp3c8_14130	1	78	1.8E-31	PANTHER	PTHR34960	-
-	-	-	-	-	-	1	78	1.8E-31	PANTHER	PTHR34960:SF3	-
-	-	-	-	-	-	1	78	1.8E-31	PANTHER	PTHR34960	-
Pp3c6_sORF1712	ID=XLOC_026335|TCONS_00045037	trans-sORF	-	-	Pp3c23_19770,Pp3c23_19830	2	64	2.2E-12	PANTHER	PTHR19446	-
-	-	-	-	-	-	2	64	2.2E-12	PANTHER	PTHR19446:SF414	-
Pp3c6_sORF1739	Pp3c6_4830	cis/trans-sORF	Stop codon excision	TRUE	Pp3c6_4830,Pp3c5_26550	-	-	-	-	-	-
Pp3c6_sORF1770	Pp3c6_4890	trans-sORF	-	-	Pp3c5_26610,Pp3c4_28290	1	74	3.1E-28	PANTHER	PTHR33701:SF6	-
-	-	-	-	-	-	1	74	3.1E-28	PANTHER	PTHR33701	-
-	-	-	-	-	-	57	82	-	MobiDBLite	mobidb-lite	consensus disorder prediction
-	-	-	-	-	-	1	74	3.1E-28	PANTHER	PTHR33701:SF6	-
Pp3c6_sORF1781	Pp3c6_4910	cis-sORF	Stop codon excision	TRUE	Pp3c6_4910	-	-	-	-	-	-
Pp3c6_sORF1920	Pp3c6_6031	cis-sORF	Stop codon excision	TRUE	Pp3c6_6031	-	-	-	-	-	-
Pp3c6_sORF1932	Pp3c6_6290	cis/trans-sORF	Stop codon excision	TRUE	Pp3c6_6290,Pp3c5_23420	-	-	-	-	-	-
Pp3c6_sORF2252	Pp3c6_8960	cis/trans-sORF	Stop codon excision	TRUE	Pp3c6_8960,Pp3c5_15800,Pp3c16_9070	70	90	-	MobiDBLite	mobidb-lite	consensus disorder prediction
-	-	-	-	-	-	1	42	-	MobiDBLite	mobidb-lite	consensus disorder prediction
-	-	-	-	-	-	70	90	-	MobiDBLite	mobidb-lite	consensus disorder prediction
Pp3c6_sORF2404	Pp3c6_10100	cis-sORF	Stop codon excision	TRUE	Pp3c6_10100	-	-	-	-	-	-
Pp3c6_sORF2495	Pp3c6_10660	cis/trans-sORF	Start codon excision,Stop codon excision	TRUE	Pp3c6_10660,Pp3c5_16340	-	-	-	-	-	-
Pp3c6_sORF2587	Pp3c6_11480	cis-sORF	Stop codon excision	TRUE	Pp3c6_11480	17	86	6.4E-21	PANTHER	PTHR36779	-
-	-	-	-	-	-	17	86	6.4E-21	PANTHER	PTHR36779	-
-	-	-	-	-	-	17	86	6.4E-21	PANTHER	PTHR36779:SF2	-
Pp3c6_sORF2622	Pp3c6_11980	cis-sORF	Stop codon excision	TRUE	Pp3c6_11980	-	-	-	-	-	-
Pp3c6_sORF2624	Pp3c6_11980	cis-sORF	Stop codon excision	TRUE	Pp3c6_11980	-	-	-	-	-	-
Pp3c6_sORF2752	Pp3c6_12940	cis-sORF	Start codon excision	TRUE	Pp3c6_12940	-	-	-	-	-	-
Pp3c6_sORF2904	Pp3c6_1360	cis-sORF	Stop codon excision	TRUE	Pp3c6_1360	3	60	2.6E-19	PANTHER	PTHR23324:SF130	-
-	-	-	-	-	-	3	60	2.6E-19	PANTHER	PTHR23324	-
-	-	-	-	-	-	3	60	2.6E-19	PANTHER	PTHR23324:SF130	-
Pp3c6_sORF2925	Pp3c6_14900	trans-sORF	-	-	Pp3c5_8550	-	-	-	-	-	-
Pp3c7_sORF293	Pp3c7_17860	cis-sORF	Stop codon excision	TRUE	Pp3c7_17860	-	-	-	-	-	-
Pp3c7_sORF320	Pp3c7_18110	trans-sORF	-	-	Pp3c16_14150,Pp3c5_8550	2	46	7.98E-13	SUPERFAMILY	SSF110019	-
-	-	-	-	-	-	2	47	8.5E-14	PANTHER	PTHR12613	-
-	-	-	-	-	-	4	47	9.7E-12	Pfam	PF04137	Endoplasmic Reticulum Oxidoreductin 1 (ERO1)
-	-	-	-	-	-	2	46	7.98E-13	SUPERFAMILY	SSF110019	-
Pp3c7_sORF326	Pp3c7_18020	cis-sORF	Excision,Stop codon excision	TRUE	Pp3c7_18020	-	-	-	-	-	-
Pp3c7_sORF327	Pp3c7_18020	cis-sORF	Stop codon excision	TRUE	Pp3c7_18020	1	32	-	MobiDBLite	mobidb-lite	consensus disorder prediction
-	-	-	-	-	-	1	32	-	MobiDBLite	mobidb-lite	consensus disorder prediction
Pp3c7_sORF483	Pp3c7_19750	cis-sORF	Stop codon excision	TRUE	Pp3c7_19750	-	-	-	-	-	-
Pp3c7_sORF667	Pp3c7_21030	trans-sORF	-	-	Pp3c9_16361	-	-	-	-	-	-
Pp3c7_sORF832	Pp3c7_23000	cis-sORF	Stop codon excision	TRUE	Pp3c7_23000	-	-	-	-	-	-
Pp3c7_sORF852	Pp3c7_23070	cis-sORF	Stop codon excision	TRUE	Pp3c7_23070	38	58	-	Coils	Coil	-
-	-	-	-	-	-	2	91	1.1E-13	PANTHER	PTHR33874	-
-	-	-	-	-	-	2	91	1.1E-13	PANTHER	PTHR33874:SF5	-
-	-	-	-	-	-	75	94	-	MobiDBLite	mobidb-lite	consensus disorder prediction
-	-	-	-	-	-	38	58	-	Coils	Coil	-
Pp3c7_sORF940	Pp3c7_23540	trans-sORF	-	-	Pp3c1_20350,Pp3c2_20840	2	68	2.5E-8	Gene3D	G3DSA:3.40.50.1460	-
-	-	-	-	-	-	4	45	7.0E-9	Pfam	PF00656	Caspase domain
-	-	-	-	-	-	2	68	2.5E-8	Gene3D	G3DSA:3.40.50.1460	-
Pp3c7_sORF1225	Pp3c7_26000	trans-sORF	-	-	Pp3c7_25830,Pp3c17_12980,Pp3c22_630,Pp3c17_12970,Pp3c22_17770	-	-	-	-	-	-
Pp3c7_sORF1288	Pp3c7_2580	trans-sORF	-	-	Pp3c11_23624,Pp3c11_23620	-	-	-	-	-	-
Pp3c7_sORF1328	Pp3c7_26710	cis-sORF	Stop codon excision	TRUE	Pp3c7_26710	-	-	-	-	-	-
Pp3c7_sORF1443	Pp3c7_2830	trans-sORF	-	-	Pp3c11_22620	-	-	-	-	-	-
Pp3c7_sORF1458	Pp3c7_2940	cis-sORF	Stop codon excision	TRUE	Pp3c7_2940	19	40	-	MobiDBLite	mobidb-lite	consensus disorder prediction
-	-	-	-	-	-	19	40	-	MobiDBLite	mobidb-lite	consensus disorder prediction
Pp3c7_sORF1577	Pp3c7_3710	trans-sORF	-	-	Pp3c2_30580,Pp3c21_10970,Pp3c5_7340,Pp3c12_25250,Pp3c1_33340	8	64	1.2E-12	Pfam	PF00067	Cytochrome P450
-	-	-	-	-	-	5	80	9.56E-17	SUPERFAMILY	SSF48264	-
-	-	-	-	-	-	4	81	3.1E-28	PANTHER	PTHR24282	-
-	-	-	-	-	-	4	83	1.1E-16	Gene3D	G3DSA:1.10.630.10	-
-	-	-	-	-	-	23	32	-	ProSitePatterns	PS00086	Cytochrome P450 cysteine heme-iron ligand sig-ture.
-	-	-	-	-	-	8	64	1.2E-12	Pfam	PF00067	Cytochrome P450
Pp3c7_sORF1886	Pp3c7_5600	trans-sORF	-	-	Pp3c3_5810,Pp3c13_4250,Pp3c26_4630,Pp3c4_25090	-	-	-	-	-	-
Pp3c7_sORF2042	Pp3c7_6470	cis/trans-sORF	Stop codon excision	TRUE	Pp3c7_6470,Pp3c19_12600,Pp3c21_15890	10	71	3.2E-20	PANTHER	PTHR11895:SF128	-
-	-	-	-	-	-	10	71	3.2E-20	PANTHER	PTHR11895	-
-	-	-	-	-	-	10	71	3.2E-20	PANTHER	PTHR11895:SF128	-
Pp3c7_sORF2190	Pp3c7_7380	cis-sORF	Stop codon excision	TRUE	Pp3c7_7380	-	-	-	-	-	-
Pp3c7_sORF2297	Pp3c7_7990	cis/trans-sORF	Stop codon excision	TRUE	Pp3c7_7990,Pp3c11_21940	-	-	-	-	-	-
Pp3c7_sORF2399	Pp3c7_8580	cis-sORF	Stop codon excision	TRUE	Pp3c7_8580	1	31	-	MobiDBLite	mobidb-lite	consensus disorder prediction
-	-	-	-	-	-	1	31	-	MobiDBLite	mobidb-lite	consensus disorder prediction
Pp3c7_sORF2432	Pp3c7_8680	cis/trans-sORF	Start codon excision,Stop codon excision	TRUE	Pp3c7_8680,Pp3c17_5160,Pp3c9_14830	1	53	5.7E-15	PANTHER	PTHR31013	-
-	-	-	-	-	-	1	53	5.7E-15	PANTHER	PTHR31013:SF9	-
-	-	-	-	-	-	2	52	3.49E-8	SUPERFAMILY	SSF49870	-
-	-	-	-	-	-	1	53	5.7E-15	PANTHER	PTHR31013	-
Pp3c7_sORF2586	Pp3c7_10650	cis-sORF	Stop codon excision	TRUE	Pp3c7_10650	-	-	-	-	-	-
Pp3c7_sORF2984	Pp3c7_14450	cis/trans-sORF	Start codon excision,Stop codon excision	TRUE	Pp3c7_14450,Pp3c20_18640,Pp3c16_19250,Pp3c24_9430	3	64	1.3E-9	Gene3D	G3DSA:3.40.1050.10	-
-	-	-	-	-	-	7	47	4.5E-7	Pfam	PF00484	Carbonic anhydrase
-	-	-	-	-	-	5	53	4.71E-10	SUPERFAMILY	SSF53056	-
-	-	-	-	-	-	3	64	1.3E-9	Gene3D	G3DSA:3.40.1050.10	-
Pp3c7_sORF3008	Pp3c7_14690	cis/trans-sORF	Stop codon excision	TRUE	Pp3c7_14690,Pp3c11_11530	-	-	-	-	-	-
Pp3c8_sORF77	Pp3c8_15800	trans-sORF	Stop codon excision	TRUE	Pp3c24_19470	-	-	-	-	-	-
Pp3c8_sORF123	Pp3c8_16040	trans-sORF	-	-	Pp3c20_16920	1	67	4.9E-15	PANTHER	PTHR16216:SF8	-
-	-	-	-	-	-	1	67	4.9E-15	PANTHER	PTHR16216	-
-	-	-	-	-	-	1	67	4.9E-15	PANTHER	PTHR16216:SF8	-
Pp3c8_sORF237	Pp3c8_16870	cis/trans-sORF	Stop codon excision	TRUE	Pp3c8_16870,Pp3c20_1680,Pp3c19_7220	3	70	8.32E-9	SUPERFAMILY	SSF52540	-
-	-	-	-	-	-	1	71	1.4E-23	Pfam	PF03029	Conserved hypothetical ATP binding protein
-	-	-	-	-	-	1	70	1.8E-37	PANTHER	PTHR21231	-
-	-	-	-	-	-	1	71	1.2E-10	Gene3D	G3DSA:3.40.50.300	-
-	-	-	-	-	-	1	70	1.8E-37	PANTHER	PTHR21231:SF9	-
-	-	-	-	-	-	3	70	8.32E-9	SUPERFAMILY	SSF52540	-
Pp3c8_sORF352	Pp3c8_17580	cis/trans-sORF	Stop codon excision	TRUE	Pp3c8_17580,Pp3c15_24180,Pp3c15_24170,Pp3c9_24080	1	48	8.2E-5	Gene3D	G3DSA:3.10.450.10	-
-	-	-	-	-	-	1	48	8.2E-5	Gene3D	G3DSA:3.10.450.10	-
Pp3c8_sORF412	Pp3c8_18170	cis-sORF	Stop codon excision	TRUE	Pp3c8_18170	-	-	-	-	-	-
Pp3c8_sORF435	Pp3c8_18180	trans-sORF	-	-	Pp3c14_1310,Pp3c13_12640,Pp3c10_1490,Pp3c3_15470,Pp3c26_7990,Pp3c1_20910,Pp3c9_7690,Pp3c18_4130,Pp3c22_21630,Pp3c3_23580,Pp3c11_19970,Pp3c7_3040,Pp3c12_25210	1	63	2.5E-21	PANTHER	PTHR24414	-
-	-	-	-	-	-	1	63	2.5E-21	PANTHER	PTHR24414:SF40	-
-	-	-	-	-	-	1	90	1.8E-11	Gene3D	G3DSA:2.120.10.80	-
-	-	-	-	-	-	1	62	1.18E-13	SUPERFAMILY	SSF117281	-
-	-	-	-	-	-	16	63	4.6E-6	SMART	SM00612	-
-	-	-	-	-	-	5	49	5.7E-13	Pfam	PF01344	Kelch motif
-	-	-	-	-	-	66	99	-	MobiDBLite	mobidb-lite	consensus disorder prediction
-	-	-	-	-	-	1	63	2.5E-21	PANTHER	PTHR24414	-
Pp3c8_sORF876	Pp3c8_21750	cis-sORF	Stop codon excision,Truncation	TRUE	Pp3c8_21750	-	-	-	-	-	-
Pp3c8_sORF881	Pp3c8_21830	trans-sORF	Stop codon excision	TRUE	Pp3c8_21910	-	-	-	-	-	-
Pp3c8_sORF1075	Pp3c8_23990	cis/trans-sORF	Stop codon excision	TRUE	Pp3c8_23990,Pp3c23_18740,Pp3c20_4300,Pp3c23_1630	-	-	-	-	-	-
Pp3c8_sORF1261	Pp3c8_25561	cis-sORF	-	-	Pp3c8_25561	1	21	-	MobiDBLite	mobidb-lite	consensus disorder prediction
Pp3c8_sORF1350	Pp3c8_3620	cis/trans-sORF	Start codon excision	TRUE	Pp3c8_3620,Pp3c3_36210	27	49	-	MobiDBLite	mobidb-lite	consensus disorder prediction
-	-	-	-	-	-	6	74	1.1E-22	PANTHER	PTHR33828:SF3	-
-	-	-	-	-	-	6	74	1.1E-22	PANTHER	PTHR33828	-
-	-	-	-	-	-	27	49	-	MobiDBLite	mobidb-lite	consensus disorder prediction
Pp3c8_sORF1573	Pp3c8_6500	cis/trans-sORF	Stop codon excision	TRUE	Pp3c8_6490,Pp3c8_6500	-	-	-	-	-	-
Pp3c8_sORF1791	Pp3c8_9180	cis-sORF	Start codon excision	TRUE	Pp3c8_9180	-	-	-	-	-	-
Pp3c8_sORF2073	Pp3c8_1130	cis/trans-sORF	Stop codon excision	TRUE	Pp3c8_1130,Pp3c14_23460,Pp3c14_24450,Pp3c14_21480,Pp3c17_19310	1	25	-	MobiDBLite	mobidb-lite	consensus disorder prediction
-	-	-	-	-	-	1	24	2.2E-6	Gene3D	G3DSA:3.10.110.10	-
Pp3c8_sORF2108	Pp3c8_12150	trans-sORF	-	-	Pp3c24_8610	-	-	-	-	-	-
Pp3c8_sORF2127	Pp3c8_12344	cis/trans-sORF	Stop codon excision	TRUE	Pp3c8_12340,Pp3c8_12344,Pp3c24_8830,Pp3c20_10590,Pp3c8_12360	-	-	-	-	-	-
Pp3c8_sORF2239	Pp3c8_13280	cis-sORF	Stop codon excision	TRUE	Pp3c8_13280	10	47	1.3E-12	PANTHER	PTHR11606:SF22	-
-	-	-	-	-	-	10	47	1.3E-12	PANTHER	PTHR11606	-
-	-	-	-	-	-	10	47	1.3E-12	PANTHER	PTHR11606:SF22	-
Pp3c8_sORF2345	Pp3c8_1460	cis-sORF	Stop codon excision	TRUE	Pp3c8_1460	-	-	-	-	-	-
Pp3c8_sORF2511	Pp3c8_15060	cis-sORF	Excision,Stop codon excision,Truncation	TRUE	Pp3c8_15060	-	-	-	-	-	-
Pp3c9_sORF195	Pp3c9_16690	trans-sORF	-	-	Pp3c14_1500	-	-	-	-	-	-
Pp3c9_sORF742	ID=XLOC_035146|TCONS_00060150	trans-sORF	-	-	Pp3c9_1600,Pp3c15_2600	-	-	-	-	-	-
Pp3c9_sORF1098	Pp3c9_25050	cis-sORF	Stop codon excision	TRUE	Pp3c9_25050	-	-	-	-	-	-
Pp3c9_sORF1201	Pp3c9_25750	cis-sORF	Stop codon excision	TRUE	Pp3c9_25750	1	32	-	MobiDBLite	mobidb-lite	consensus disorder prediction
Pp3c9_sORF1253	Pp3c9_26100	cis-sORF	Stop codon excision	TRUE	Pp3c9_26100	-	-	-	-	-	-
Pp3c9_sORF1377	Pp3c9_60	trans-sORF	Stop codon excision	TRUE	Pp3c9_80,Pp3c15_330	-	-	-	-	-	-
Pp3c9_sORF1450	Pp3c9_500	trans-sORF	Stop codon excision,Truncation	TRUE	Pp3c7_25370,Pp3c1_6950	9	65	2.0E-15	PANTHER	PTHR13683:SF396	-
-	-	-	-	-	-	4	65	6.4E-6	Gene3D	G3DSA:2.40.70.10	-
-	-	-	-	-	-	9	65	2.0E-15	PANTHER	PTHR13683	-
-	-	-	-	-	-	5	64	4.12E-7	SUPERFAMILY	SSF50630	-
Pp3c9_sORF1511	ID=XLOC_011326|TCONS_00019234	trans-sORF	-	-	Pp3c24_11260	-	-	-	-	-	-
Pp3c9_sORF1718	Pp3c9_5550	trans-sORF	-	-	Pp3c9_5460	-	-	-	-	-	-
Pp3c9_sORF1788	Pp3c9_6110	cis-sORF	Stop codon excision	TRUE	Pp3c9_6110	-	-	-	-	-	-
Pp3c9_sORF1815	Pp3c9_6610	cis/trans-sORF	Stop codon excision	TRUE	Pp3c9_6610,Pp3c15_6590	1	53	-	MobiDBLite	mobidb-lite	consensus disorder prediction
Pp3c9_sORF1981	Pp3c9_8300	trans-sORF	Stop codon excision	TRUE	Pp3c9_8340	15	43	-	MobiDBLite	mobidb-lite	consensus disorder prediction
-	-	-	-	-	-	15	43	-	MobiDBLite	mobidb-lite	consensus disorder prediction
Pp3c9_sORF2052	Pp3c9_9200	cis/trans-sORF	Start codon excision	TRUE	Pp3c9_9200,Pp3c15_17530	25	72	6.2E-12	Pfam	PF17136	Ribosomal proteins 50S L24/mitochondrial 39S L24
-	-	-	-	-	-	25	87	5.9E-33	PANTHER	PTHR12903	-
-	-	-	-	-	-	18	61	2.3E-5	Gene3D	G3DSA:2.30.30.30	-
-	-	-	-	-	-	24	71	6.84E-9	SUPERFAMILY	SSF50104	-
-	-	-	-	-	-	25	87	5.9E-33	PANTHER	PTHR12903:SF5	-
-	-	-	-	-	-	25	72	6.2E-12	Pfam	PF17136	Ribosomal proteins 50S L24/mitochondrial 39S L24
Pp3c9_sORF2074	Pp3c9_9290	cis/trans-sORF	Stop codon excision	TRUE	Pp3c9_9290,Pp3c9_4250,Pp3c9_8200	-	-	-	-	-	-
Pp3c9_sORF2273	Pp3c9_11540	cis-sORF	Stop codon excision	TRUE	Pp3c9_11540	-	-	-	-	-	-
Pp3c9_sORF2278	Pp3c9_11400	trans-sORF	-	-	Pp3c15_11580	29	78	-	MobiDBLite	mobidb-lite	consensus disorder prediction
-	-	-	-	-	-	29	78	-	MobiDBLite	mobidb-lite	consensus disorder prediction
Pp3c9_sORF2281	Pp3c9_11390	trans-sORF	-	-	Pp3c15_11580,Pp3c3_32390,Pp3c12_24850,Pp3c7_250,Pp3c11_22850,Pp3c4_6340,Pp3c5_10560,Pp3c11_2920,Pp3c16_7080	1	63	1.1E-20	PANTHER	PTHR31439	-
-	-	-	-	-	-	1	63	1.1E-20	PANTHER	PTHR31439:SF5	-
-	-	-	-	-	-	1	63	1.1E-20	PANTHER	PTHR31439	-
Pp3c9_sORF2398	Pp3c9_12500	trans-sORF	-	-	Pp3c15_14500	-	-	-	-	-	-
Pp3c9_sORF2448	Pp3c9_1500	trans-sORF	-	-	Pp3c15_2540,Pp3c17_7890,Pp3c1_4270,Pp3c2_37350,Pp3c2_37490,Pp3c13_1410,Pp3c26_10280	12	52	8.1E-10	Pfam	PF13602	Zinc-binding dehydroge-se
-	-	-	-	-	-	4	53	3.9E-12	PANTHER	PTHR11695:SF641	-
-	-	-	-	-	-	1	55	1.9E-10	Gene3D	G3DSA:3.90.180.10	-
-	-	-	-	-	-	4	53	3.9E-12	PANTHER	PTHR11695	-
-	-	-	-	-	-	12	52	8.1E-10	Pfam	PF13602	Zinc-binding dehydroge-se
Pp3c9_sORF2517	Pp3c9_1280	trans-sORF	-	-	Pp3c15_1670,Pp3c12_2120	-	-	-	-	-	-
Pp3c10_sORF9	ID=XLOC_020679|TCONS_00035263	trans-sORF	-	-	Pp3c3_25440	3	52	1.4E-12	PANTHER	PTHR31515:SF8	-
-	-	-	-	-	-	3	52	1.4E-12	PANTHER	PTHR31515	-
Pp3c10_sORF259	Pp3c10_17041	trans-sORF	-	-	Pp3s1006_30,Pp3s638_22,Pp3c10_15084,Pp3c24_16091	1	26	-	MobiDBLite	mobidb-lite	consensus disorder prediction
Pp3c10_sORF381	Pp3c10_18300	trans-sORF	Start codon excision	TRUE	Pp3c4_8970,Pp3c12_16900	16	81	9.2E-19	PANTHER	PTHR10410:SF8	-
-	-	-	-	-	-	16	81	9.2E-19	PANTHER	PTHR10410	-
Pp3c10_sORF382	Pp3c10_18300	trans-sORF	Excision,Stop codon excision	TRUE	Pp3c12_16900,Pp3c4_8970	-	-	-	-	-	-
Pp3c10_sORF401	Pp3c10_18450	trans-sORF	Stop codon excision	TRUE	Pp3c8_4750	-	-	-	-	-	-
Pp3c10_sORF405	ID=XLOC_009872|TCONS_00016722 | lncR-s: lcl|Ppatens_Pp3c10_18530	trans-sORF	-	-	Pp3c3_28450	-	-	-	-	-	-
Pp3c10_sORF705	Pp3c10_21490	cis-sORF	Start codon excision	TRUE	Pp3c10_21490	-	-	-	-	-	-
Pp3c10_sORF710	Pp3c10_21530	cis-sORF	Stop codon excision	TRUE	Pp3c10_21530	-	-	-	-	-	-
Pp3c10_sORF776	Pp3c10_22140	cis-sORF	Start codon excision	TRUE	Pp3c10_22140	-	-	-	-	-	-
Pp3c10_sORF1054	Pp3c10_25170	cis-sORF	Stop codon excision	TRUE	Pp3c10_25170	-	-	-	-	-	-
Pp3c10_sORF1111	Pp3c10_25760	cis-sORF	Stop codon excision	TRUE	Pp3c10_25760	-	-	-	-	-	-
Pp3c10_sORF1153	Pp3c10_2220	cis-sORF	Stop codon excision	TRUE	Pp3c10_2220	-	-	-	-	-	-
Pp3c10_sORF1214	Pp3c10_2600	trans-sORF	Stop codon excision	TRUE	Pp3c10_2610,Pp3c2_19730	7	58	4.47E-6	SUPERFAMILY	SSF50692	-
-	-	-	-	-	-	8	81	2.5E-9	Gene3D	G3DSA:2.40.40.20	-
Pp3c10_sORF1272	Pp3c10_2690	trans-sORF	Start codon excision,Stop codon excision	TRUE	Pp3c10_2700	18	84	1.3E-25	PANTHER	PTHR21521	-
-	-	-	-	-	-	5	74	9.0E-4	Gene3D	G3DSA:1.10.340.30	-
Pp3c10_sORF1465	Pp3c10_4060	trans-sORF	Start codon excision,Stop codon excision	TRUE	Pp3c14_4530,Pp3c6_23030,Pp3c10_4050	-	-	-	-	-	-
Pp3c10_sORF1534	Pp3c10_4870	cis-sORF	Excision,Stop codon excision	TRUE	Pp3c10_4870	-	-	-	-	-	-
Pp3c10_sORF1661	Pp3c10_5850	trans-sORF	Stop codon excision	TRUE	Pp3c10_5860,Pp3c14_4243,Pp3c14_4240,Pp3c5_8950,Pp3c16_8340	4	62	1.3E-7	Gene3D	G3DSA:3.30.830.10	-
Pp3c10_sORF1785	Pp3c10_6850	cis-sORF	Start codon excision	TRUE	Pp3c10_6850	-	-	-	-	-	-
Pp3c10_sORF1937	Pp3c10_8120	cis/trans-sORF	Start codon excision,Stop codon excision	TRUE	Pp3c10_8120,Pp3c1_34410,Pp3c6_7790,Pp3c25_6520,Pp3c16_18860	-	-	-	-	-	-
Pp3c10_sORF2035	Pp3c10_8880	trans-sORF	-	-	Pp3c2_2400	-	-	-	-	-	-
Pp3c10_sORF2100	Pp3c10_9420	cis/trans-sORF	Stop codon excision	TRUE	Pp3c10_9420,Pp3c4_16910	-	-	-	-	-	-
Pp3c10_sORF2199	Pp3c10_10520	cis/trans-sORF	Stop codon excision	TRUE	Pp3c10_10520,Pp3c9_8440,Pp3c15_9320	-	-	-	-	-	-
Pp3c10_sORF2352	Pp3c10_11740	cis-sORF	Stop codon excision	TRUE	Pp3c10_11740	-	-	-	-	-	-
Pp3c10_sORF2627	Pp3c10_14100	cis-sORF	Start codon excision	TRUE	Pp3c10_14100	-	-	-	-	-	-
Pp3c10_sORF2675	Pp3c10_14490	cis-sORF	Stop codon excision	TRUE	Pp3c10_14490	-	-	-	-	-	-
Pp3c11_sORF171	Pp3c11_17010	trans-sORF	-	-	Pp3c7_11520	-	-	-	-	-	-
Pp3c11_sORF246	Pp3c11_17810	cis-sORF	Stop codon excision	TRUE	Pp3c11_17810	1	58	-	MobiDBLite	mobidb-lite	consensus disorder prediction
-	-	-	-	-	-	1	58	-	MobiDBLite	mobidb-lite	consensus disorder prediction
Pp3c11_sORF292	Pp3c11_18100	trans-sORF	-	-	Pp3c7_6480	-	-	-	-	-	-
Pp3c11_sORF902	Pp3c11_22230	cis-sORF	Stop codon excision	TRUE	Pp3c11_22230	-	-	-	-	-	-
Pp3c11_sORF1057	ID=XLOC_019858|TCONS_00033834	trans-sORF	-	-	Pp3c7_220	30	50	-	MobiDBLite	mobidb-lite	consensus disorder prediction
Pp3c11_sORF1303	Pp3c11_2407	cis/trans-sORF	-	-	Pp3s51_240,Pp3c11_3900,Pp3c11_3860,Pp3c11_2407,Pp3c11_2480,Pp3c20_21980	26	60	1.85E-6	SUPERFAMILY	SSF47699	-
-	-	-	-	-	-	19	66	1.1E-4	Gene3D	G3DSA:1.10.110.10	-
Pp3c11_sORF1417	Pp3c11_24960	trans-sORF	-	-	Pp3c7_8430	-	-	-	-	-	-
Pp3c11_sORF1418	Pp3c11_24960	trans-sORF	-	-	Pp3c7_8430,Pp3c25_10770,Pp3c6_720	2	81	2.8E-18	PANTHER	PTHR10635	-
-	-	-	-	-	-	1	81	5.2E-6	Gene3D	G3DSA:1.25.10.10	-
-	-	-	-	-	-	2	81	2.8E-18	PANTHER	PTHR10635:SF1	-
Pp3c11_sORF1504	Pp3c11_25660	cis-sORF	Start codon excision,Stop codon excision	TRUE	Pp3c11_25660	-	-	-	-	-	-
Pp3c11_sORF1688	Pp3c11_3000	cis-sORF	Stop codon excision	TRUE	Pp3c11_3000	-	-	-	-	-	-
Pp3c11_sORF1739	Pp3c11_559	trans-sORF	-	-	Pp3c13_7510,Pp3c26_12730	-	-	-	-	-	-
Pp3c11_sORF1799	Pp3c11_4620	cis/trans-sORF	Stop codon excision	TRUE	Pp3c11_4620,Pp3c1_3310	-	-	-	-	-	-
Pp3c11_sORF1869	Pp3c11_520	cis-sORF	Start codon excision	TRUE	Pp3c11_520	-	-	-	-	-	-
Pp3c11_sORF2003	Pp3c11_6110	trans-sORF	-	-	Pp3c7_25390,Pp3c1_6940	-	-	-	-	-	-
Pp3c11_sORF2071	ID=XLOC_016643|TCONS_00028355	trans-sORF	-	-	Pp3c2_13700,Pp3c6_24250,Pp3c1_34560,Pp3c6_17920,Pp3c1_3670,Pp3c1_34600,Pp3c3_14710	6	58	4.3E-16	PANTHER	PTHR33281	-
-	-	-	-	-	-	6	56	1.6E-7	Pfam	PF01062	Bestrophin, RFP-TM, chloride channel
Pp3c11_sORF2072	ID=XLOC_016643|TCONS_00028355	trans-sORF	-	-	Pp3c2_13700,Pp3c4_15850,Pp3c3_22870,Pp3c1_3670,Pp3c1_34600,Pp3c6_17920,Pp3c6_24250,Pp3c1_34560,Pp3c3_14710	-	-	-	-	-	-
Pp3c11_sORF2073	ID=XLOC_016643|TCONS_00028355	trans-sORF	-	-	Pp3c2_13700	-	-	-	-	-	-
Pp3c11_sORF2082	Pp3c11_6870	cis/trans-sORF	Start codon excision	FALSE	Pp3c11_6870,Pp3c9_10760,Pp3c9_10640,Pp3c20_17290,Pp3c1_23040,Pp3c1_23020,Pp3c20_16970,Pp3c4_18780,Pp3c4_18720,Pp3c4_18510,Pp3c4_18360,Pp3c10_1880,Pp3c12_22990,Pp3c12_5800,Pp3c10_6800,Pp3c14_9730,Pp3c12_2140,Pp3c4_18960,Pp3c3_28930,Pp3c7_1440,Pp3c13_18000,Pp3c11_23980,Pp3c2_17640,Pp3c4_2350,Pp3c12_14020,Pp3c1_39210,Pp3c4_22080,Pp3c1_18280,Pp3c1_22880,Pp3c27_4590,Pp3c5_18040,Pp3c23_14970,Pp3c4_2823…	21	87	4.2E-22	PANTHER	PTHR27003	-
-	-	-	-	-	-	21	87	4.2E-22	PANTHER	PTHR27003:SF193	-
-	-	-	-	-	-	38	85	1.9E-5	Pfam	PF07714	Protein tyrosine ki-se
-	-	-	-	-	-	21	86	8.73E-11	SUPERFAMILY	SSF56112	-
-	-	-	-	-	-	39	61	-	ProSitePatterns	PS00107	Protein ki-ses ATP-binding region sig-ture.
-	-	-	-	-	-	17	90	1.5E-12	Gene3D	G3DSA:3.30.200.20	-
Pp3c11_sORF2084	Pp3c11_6870	cis/trans-sORF	-	-	Pp3c20_17290,Pp3c20_16970,Pp3c9_10760,Pp3c9_10640,Pp3c12_16180,Pp3c4_2350,Pp3c7_26460,Pp3c16_12990,Pp3c11_6870,Pp3c5_1950,Pp3c2_18520,Pp3c13_12310,Pp3c3_28930,Pp3c8_22340,Pp3c17_14370,Pp3c5_17270,Pp3c5_17340,Pp3c6_16360,Pp3c4_18780,Pp3c4_18510,Pp3c4_18720,Pp3c4_18360,Pp3c4_19890,Pp3c23_14970,Pp3c20_14660,Pp3c15_5330,Pp3c3_25390,Pp3c4_19720,Pp3c12_9140,Pp3c2_17640,Pp3c1_22880,Pp3c6_15470,Pp3c16_16…	3	61	2.6E-8	Gene3D	G3DSA:1.10.510.10	-
-	-	-	-	-	-	9	52	3.12E-10	SUPERFAMILY	SSF56112	-
-	-	-	-	-	-	3	55	3.0E-23	PANTHER	PTHR27003	-
-	-	-	-	-	-	16	50	8.4E-5	Pfam	PF07714	Protein tyrosine ki-se
-	-	-	-	-	-	3	55	3.0E-23	PANTHER	PTHR27003:SF168	-
Pp3c11_sORF2357	Pp3c11_9420	cis/trans-sORF	Start codon excision,Stop codon excision	TRUE	Pp3c11_9420,Pp3c11_9380,Pp3c7_18290	-	-	-	-	-	-
Pp3c11_sORF2378	Pp3c11_9540	cis-sORF	Stop codon excision	TRUE	Pp3c11_9540	-	-	-	-	-	-
Pp3c11_sORF2463	Pp3c11_10190	trans-sORF	Truncation	TRUE	Pp3c11_10040	1	20	-	MobiDBLite	mobidb-lite	consensus disorder prediction
Pp3c11_sORF2506	Pp3c11_10500	trans-sORF	-	-	Pp3c7_16420,Pp3c1_4210	1	67	-	MobiDBLite	mobidb-lite	consensus disorder prediction
Pp3c11_sORF2524	Pp3c11_10970	cis-sORF	-	-	Pp3c11_10970	50	73	-	MobiDBLite	mobidb-lite	consensus disorder prediction
Pp3c11_sORF2553	Pp3c11_30	trans-sORF	-	-	Pp3c6_13660,Pp3c6_13600,Pp3c5_14090,Pp3c5_14060	9	68	5.9E-20	PANTHER	PTHR14493	-
-	-	-	-	-	-	9	68	5.9E-20	PANTHER	PTHR14493:SF59	-
Pp3c11_sORF2635	Pp3c11_30	trans-sORF	-	-	Pp3c6_13660,Pp3c6_13600	1	72	-	MobiDBLite	mobidb-lite	consensus disorder prediction
Pp3c11_sORF2788	Pp3c11_1630	cis-sORF	Start codon excision	TRUE	Pp3c11_1630	-	-	-	-	-	-
Pp3c11_sORF2920	Pp3c11_14980	trans-sORF	Stop codon excision	TRUE	Pp3c11_15070	-	-	-	-	-	-
Pp3c11_sORF2931	Pp3c11_14950	cis/trans-sORF	Stop codon excision	TRUE	Pp3c11_14950,Pp3c7_10260	-	-	-	-	-	-
Pp3c12_sORF26	Pp3c12_14950	trans-sORF	-	-	Pp3c4_20570	18	38	-	MobiDBLite	mobidb-lite	consensus disorder prediction
Pp3c12_sORF84	Pp3c12_15530	cis-sORF	Start codon excision,Stop codon excision	TRUE	Pp3c12_15530	-	-	-	-	-	-
Pp3c12_sORF101	Pp3c12_15740	cis-sORF	Stop codon excision	TRUE	Pp3c12_15740	-	-	-	-	-	-
Pp3c12_sORF692	Pp3c12_22620	trans-sORF	Stop codon excision	TRUE	Pp3c3_36740,Pp3c3_36976,Pp3c3_36960,Pp3c3_36952,Pp3c8_3323,Pp3c8_3320	1	69	-	MobiDBLite	mobidb-lite	consensus disorder prediction
Pp3c12_sORF823	Pp3c12_23570	cis/trans-sORF	Stop codon excision	TRUE	Pp3c12_23570,Pp3c3_36680,Pp3c8_3330	-	-	-	-	-	-
Pp3c12_sORF825	Pp3c12_23580	cis/trans-sORF	Start codon excision,Stop codon excision	TRUE	Pp3c8_3370,Pp3c12_23580,Pp3c3_36670,Pp3c4_7470	3	30	8.4E-5	Gene3D	G3DSA:1.20.20.10	-
Pp3c12_sORF1406	Pp3c12_4799	trans-sORF	-	-	Pp3c8_590	-	-	-	-	-	-
Pp3c12_sORF1415	Pp3c12_5050	cis-sORF	Stop codon excision	TRUE	Pp3c12_5050	-	-	-	-	-	-
Pp3c12_sORF1576	ID=XLOC_029074|TCONS_00049784	trans-sORF	-	-	Pp3c4_15690	-	-	-	-	-	-
Pp3c12_sORF1641	Pp3c12_7730	cis-sORF	Stop codon excision	TRUE	Pp3c12_7730	59	87	-	MobiDBLite	mobidb-lite	consensus disorder prediction
-	-	-	-	-	-	1	27	-	MobiDBLite	mobidb-lite	consensus disorder prediction
Pp3c12_sORF1673	Pp3c12_8320	cis-sORF	Excision,Stop codon excision	TRUE	Pp3c12_8320	-	-	-	-	-	-
Pp3c12_sORF1792	Pp3c12_8960	trans-sORF	-	-	Pp3c24_12830,Pp3c23_7400,Pp3c8_21000	-	-	-	-	-	-
Pp3c12_sORF1974	Pp3c12_10480	trans-sORF	-	-	Pp3c2_1790,Pp3c14_7880	-	-	-	-	-	-
Pp3c12_sORF2020	Pp3c12_10970	trans-sORF	Start codon excision	TRUE	Pp3c12_10910,Pp3c12_10960,Pp3c4_13300	-	-	-	-	-	-
Pp3c12_sORF2202	Pp3c12_12829	trans-sORF	-	-	Pp3c21_19400	-	-	-	-	-	-
Pp3c12_sORF2286	Pp3c12_13630	cis-sORF	Start codon excision,Stop codon excision	TRUE	Pp3c12_13630	9	60	4.97E-5	SUPERFAMILY	SSF48366	-
-	-	-	-	-	-	4	68	7.2E-4	Gene3D	G3DSA:1.10.840.10	-
Pp3c12_sORF2310	Pp3c12_13780	cis/trans-sORF	Start codon excision,Stop codon excision	TRUE	Pp3c12_13780,Pp3c4_9300	-	-	-	-	-	-
Pp3c12_sORF2340	Pp3c12_14169	trans-sORF	-	-	Pp3c21_3570	1	48	-	MobiDBLite	mobidb-lite	consensus disorder prediction
Pp3c12_sORF2433	Pp3c12_14810	trans-sORF	-	-	Pp3c15_13580	-	-	-	-	-	-
Pp3c13_sORF173	Pp3c13_14720	trans-sORF	Stop codon excision	TRUE	Pp3c13_14730	-	-	-	-	-	-
Pp3c13_sORF436	Pp3c13_17210	trans-sORF	-	-	Pp3c3_23940	-	-	-	-	-	-
Pp3c13_sORF464	Pp3c13_17480	trans-sORF	-	-	Pp3c5_2280	-	-	-	-	-	-
Pp3c13_sORF472	Pp3c13_17650	trans-sORF	-	-	Pp3c4_7920	-	-	-	-	-	-
Pp3c13_sORF653	Pp3c13_2340	cis/trans-sORF	Stop codon excision	TRUE	Pp3c13_2340,Pp3c3_5570,Pp3c18_12780,Pp3c1_37450,Pp3c2_5790,Pp3c10_7160,Pp3c14_7960,Pp3c2_13790,Pp3c27_2930,Pp3c5_7750,Pp3c16_15230	4	81	1.8E-14	Gene3D	G3DSA:3.30.200.20	-
-	-	-	-	-	-	34	77	4.8E-14	PANTHER	PTHR24343:SF287	-
-	-	-	-	-	-	34	77	4.8E-14	PANTHER	PTHR24343	-
-	-	-	-	-	-	36	82	9.164	ProSiteProfiles	PS50011	Protein ki-se domain profile.
-	-	-	-	-	-	42	65	-	ProSitePatterns	PS00107	Protein ki-ses ATP-binding region sig-ture.
-	-	-	-	-	-	35	78	2.05E-10	SUPERFAMILY	SSF56112	-
-	-	-	-	-	-	36	78	1.0E-7	Pfam	PF00069	Protein ki-se domain
Pp3c13_sORF729	Pp3c13_20260	trans-sORF	-	-	Pp3c3_26530	-	-	-	-	-	-
Pp3c13_sORF731	Pp3c13_20260	trans-sORF	-	-	Pp3c3_26530	-	-	-	-	-	-
Pp3c13_sORF906	Pp3c13_21770	cis-sORF	Stop codon excision	TRUE	Pp3c13_21770	-	-	-	-	-	-
Pp3c13_sORF1447	Pp3c13_5050	cis/trans-sORF	Truncation	TRUE	Pp3c13_5050,Pp3c3_3130,Pp3c26_11470	1	21	-	MobiDBLite	mobidb-lite	consensus disorder prediction
Pp3c13_sORF1500	Pp3c13_20	trans-sORF	Stop codon excision	TRUE	Pp3c6_13660,Pp3c6_13600,Pp3c5_14090,Pp3c5_14060	14	92	7.4E-19	PANTHER	PTHR14493:SF59	-
-	-	-	-	-	-	14	92	7.4E-19	PANTHER	PTHR14493	-
Pp3c13_sORF1630	Pp3c13_7440	cis-sORF	Excision,Stop codon excision	TRUE	Pp3c13_7440	-	-	-	-	-	-
Pp3c13_sORF1794	Pp3c13_8590	cis-sORF	Stop codon excision	TRUE	Pp3c13_8590	-	-	-	-	-	-
Pp3c13_sORF1867	Pp3c13_9240	cis-sORF	Stop codon excision	TRUE	Pp3c13_9240	-	-	-	-	-	-
Pp3c13_sORF1904	Pp3c13_1020	cis/trans-sORF	Stop codon excision	TRUE	Pp3c13_1020,Pp3c3_290,Pp3c8_7470,Pp3c3_28940	15	57	3.5E-5	Pfam	PF00089	Trypsin
-	-	-	-	-	-	1	80	1.5E-39	PANTHER	PTHR22939:SF121	-
-	-	-	-	-	-	2	78	1.91E-10	SUPERFAMILY	SSF50494	-
-	-	-	-	-	-	1	80	1.5E-39	PANTHER	PTHR22939	-
-	-	-	-	-	-	1	80	9.7E-13	Gene3D	G3DSA:2.40.10.10	-
Pp3c13_sORF1926	Pp3c13_10570	cis-sORF	Stop codon excision	TRUE	Pp3c13_10570	-	-	-	-	-	-
Pp3c13_sORF2072	Pp3c13_11540	trans-sORF	Truncation	TRUE	Pp3c3_10000	1	64	6.8E-15	PANTHER	PTHR32093:SF47	-
-	-	-	-	-	-	1	64	6.8E-15	PANTHER	PTHR32093	-
Pp3c13_sORF2103	Pp3c13_1310	trans-sORF	Start codon excision	TRUE	Pp3c13_1340	10	71	6.0E-8	Pfam	PF09749	Uncharacterised conserved protein
Pp3c13_sORF2186	Pp3c13_12620	cis/trans-sORF	Stop codon excision	TRUE	Pp3c13_12620,Pp3c3_15480	1	22	-	MobiDBLite	mobidb-lite	consensus disorder prediction
Pp3c14_sORF58	Pp3c14_1270	cis-sORF	Stop codon excision	TRUE	Pp3c14_1270	-	-	-	-	-	-
Pp3c14_sORF299	Pp3c14_1530	cis/trans-sORF	Stop codon excision	TRUE	Pp3c14_1530,Pp3c1_18130	-	-	-	-	-	-
Pp3c14_sORF324	Pp3c14_18760	cis/trans-sORF	Start codon excision,Stop codon excision	TRUE	Pp3c14_18760,Pp3c17_20830	1	68	-	MobiDBLite	mobidb-lite	consensus disorder prediction
Pp3c14_sORF359	Pp3c14_19070	cis-sORF	Stop codon excision	TRUE	Pp3c14_19070	1	32	-	MobiDBLite	mobidb-lite	consensus disorder prediction
Pp3c14_sORF381	Pp3c14_1610	cis-sORF	Stop codon excision	TRUE	Pp3c14_1610	-	-	-	-	-	-
Pp3c14_sORF545	Pp3c14_20390	trans-sORF	Stop codon excision	TRUE	Pp3c14_20400	-	-	-	-	-	-
Pp3c14_sORF728	Pp3c14_21620	cis/trans-sORF	Stop codon excision	TRUE	Pp3c14_21620,Pp3c17_18190	-	-	-	-	-	-
Pp3c14_sORF752	Pp3c14_21880	cis/trans-sORF	Stop codon excision	TRUE	Pp3c14_21890,Pp3c14_21880	1	27	-	MobiDBLite	mobidb-lite	consensus disorder prediction
Pp3c14_sORF819	Pp3c14_22420	trans-sORF	-	-	Pp3c10_10040	59	78	-	MobiDBLite	mobidb-lite	consensus disorder prediction
Pp3c14_sORF821	Pp3c14_22450	cis-sORF	Stop codon excision	TRUE	Pp3c14_22450	-	-	-	-	-	-
Pp3c14_sORF949	Pp3c14_23480	trans-sORF	-	-	Pp3c3_1260,Pp3c3_1480	-	-	-	-	-	-
Pp3c14_sORF951	Pp3c14_23480	trans-sORF	-	-	Pp3c3_1460,Pp3c3_1480,Pp3c16_20430,Pp3c3_1260	37	98	2.1E-8	Gene3D	G3DSA:1.10.20.10	-
-	-	-	-	-	-	43	95	1.51E-5	SUPERFAMILY	SSF52540	-
-	-	-	-	-	-	37	95	1.7E-9	Pfam	PF00931	NB-ARC domain
Pp3c14_sORF952	Pp3c14_23480	trans-sORF	Start codon excision,Stop codon excision	FALSE	Pp3c3_1260,Pp3c3_1480,Pp3c3_1460,Pp3c16_20430	25	45	-	Coils	Coil	-
Pp3c14_sORF965	Pp3c14_23550	cis/trans-sORF	Stop codon excision	TRUE	Pp3c14_23550,Pp3c17_21870	-	-	-	-	-	-
Pp3c14_sORF1285	Pp3c14_26340	cis-sORF	Stop codon excision	TRUE	Pp3c14_26340	-	-	-	-	-	-
Pp3c14_sORF1381	Pp3c14_2440	cis-sORF	Start codon excision	TRUE	Pp3c14_2440	-	-	-	-	-	-
Pp3c14_sORF1386	Pp3c14_2650	cis-sORF	Stop codon excision	TRUE	Pp3c14_2650	-	-	-	-	-	-
Pp3c14_sORF1809	Pp3c14_6160	cis-sORF	Start codon excision	TRUE	Pp3c14_6160	-	-	-	-	-	-
Pp3c14_sORF1895	Pp3c14_6980	trans-sORF	Stop codon excision	TRUE	Pp3c10_2950	-	-	-	-	-	-
Pp3c14_sORF1907	Pp3c14_6810	trans-sORF	-	-	Pp3c3_37951	-	-	-	-	-	-
Pp3c14_sORF1955	Pp3c14_7350	trans-sORF	Stop codon excision	TRUE	Pp3c22_23030	31	58	-	MobiDBLite	mobidb-lite	consensus disorder prediction
Pp3c14_sORF2008	Pp3c14_7860	cis/trans-sORF	Stop codon excision	TRUE	Pp3c14_7860,Pp3c10_6770	1	20	-	MobiDBLite	mobidb-lite	consensus disorder prediction
Pp3c14_sORF2114	Pp3c14_8810	cis/trans-sORF	Stop codon excision	TRUE	Pp3c14_8810,Pp3c14_3630,Pp3c10_4370	12	67	1.32673E-12	CDD	cd02947	TRX_family
-	-	-	-	-	-	11	54	2.4E-6	Pfam	PF00085	Thioredoxin
-	-	-	-	-	-	2	57	2.09E-13	SUPERFAMILY	SSF52833	-
-	-	-	-	-	-	1	69	9.2E-12	Gene3D	G3DSA:3.40.30.10	-
Pp3c14_sORF2223	Pp3c14_9810	cis/trans-sORF	Start codon excision,Stop codon excision	TRUE	Pp3c14_9810,Pp3c27_2580,Pp3c23_12740,Pp3c23_6310,Pp3c24_3720,Pp3c20_19150	23	55	6.3E-13	PANTHER	PTHR23336	-
-	-	-	-	-	-	11	71	5.8E-6	Gene3D	G3DSA:3.30.565.10	-
-	-	-	-	-	-	23	55	6.3E-13	PANTHER	PTHR23336:SF27	-
Pp3c14_sORF2236	Pp3c14_740	trans-sORF	-	-	Pp3c17_19630,Pp3c17_19670,Pp3c14_13750,Pp3c14_12270	21	63	3.7E-12	PANTHER	PTHR32044	-
-	-	-	-	-	-	21	63	3.7E-12	PANTHER	PTHR32044:SF42	-
Pp3c14_sORF2285	Pp3c14_10530	trans-sORF	-	-	Pp3c17_13700	-	-	-	-	-	-
Pp3c14_sORF2402	Pp3c14_11550	cis/trans-sORF	Excision,Stop codon excision	TRUE	Pp3c14_11550,Pp3c17_7290	-	-	-	-	-	-
Pp3c14_sORF2506	Pp3c14_12190	cis-sORF	Start codon excision	TRUE	Pp3c14_12190	-	-	-	-	-	-
Pp3c14_sORF2549	Pp3c14_12450	trans-sORF	Start codon excision,Stop codon excision	TRUE	Pp3c23_11640,Pp3c17_19860	18	61	1.2E-16	PANTHER	PTHR35102	-
-	-	-	-	-	-	18	61	1.2E-16	PANTHER	PTHR35102:SF2	-
Pp3c14_sORF2727	Pp3c14_13820	cis/trans-sORF	Truncation	TRUE	Pp3c10_10460,Pp3c2_15630,Pp3c16_12080,Pp3c6_17000,Pp3c5_13670,Pp3c16_22550,Pp3c14_13820,Pp3c25_12520,Pp3c22_5530	24	77	1.09E-7	SUPERFAMILY	SSF111352	-
-	-	-	-	-	-	1	78	1.0E-32	PANTHER	PTHR43029	-
-	-	-	-	-	-	21	78	4.8E-10	Gene3D	G3DSA:1.10.3430.10	-
-	-	-	-	-	-	1	78	1.0E-32	PANTHER	PTHR43029:SF4	-
Pp3c14_sORF2935	Pp3c14_15540	cis-sORF	Stop codon excision	TRUE	Pp3c14_15540	-	-	-	-	-	-
Pp3c15_sORF104	Pp3c15_15980	cis/trans-sORF	Stop codon excision	TRUE	Pp3c15_15980,Pp3c9_15980	24	42	3.3E-13	PRINTS	PR02001	GCR1-cAMP receptor family sig-ture
-	-	-	-	-	-	43	58	3.3E-13	PRINTS	PR02001	GCR1-cAMP receptor family sig-ture
-	-	-	-	-	-	46	68	7.7E-16	PRINTS	PR02000	Putative plant GPCR, GCR1, sig-ture
-	-	-	-	-	-	13	28	7.7E-16	PRINTS	PR02000	Putative plant GPCR, GCR1, sig-ture
-	-	-	-	-	-	30	44	7.7E-16	PRINTS	PR02000	Putative plant GPCR, GCR1, sig-ture
Pp3c15_sORF201	Pp3c15_17070	trans-sORF	-	-	Pp3c2_2400,Pp3c25_3928	-	-	-	-	-	-
Pp3c15_sORF390	Pp3c15_19060	cis-sORF	Start codon excision,Stop codon excision	TRUE	Pp3c15_19060	-	-	-	-	-	-
Pp3c15_sORF871	Pp3c15_23550	cis-sORF	Stop codon excision	TRUE	Pp3c15_23550	-	-	-	-	-	-
Pp3c15_sORF901	Pp3c15_23860	cis/trans-sORF	Stop codon excision	TRUE	Pp3c15_23860,Pp3c9_24430	-	-	-	-	-	-
Pp3c15_sORF1027	Pp3c15_24460	trans-sORF	-	-	Pp3c9_25160,Pp3c6_15020,Pp3c2_19330,Pp3c1_18090,Pp3c7_17730,Pp3c2_16310,Pp3c10_3860,Pp3c9_4870,Pp3c18_2110,Pp3c21_21550,Pp3c17_4020,Pp3c9_18950	1	66	1.5E-16	PANTHER	PTHR24423:SF602	-
-	-	-	-	-	-	1	66	1.5E-16	PANTHER	PTHR24423	-
-	-	-	-	-	-	1	77	1.14E-11	SUPERFAMILY	SSF52172	-
-	-	-	-	-	-	1	70	3.6509E-7	CDD	cd00156	REC
-	-	-	-	-	-	1	79	2.7E-14	Gene3D	G3DSA:3.40.50.2300	-
-	-	-	-	-	-	1	70	16.846	ProSiteProfiles	PS50110	Response regulatory domain profile.
-	-	-	-	-	-	1	63	6.3E-7	Pfam	PF00072	Response regulator receiver domain
Pp3c15_sORF1136	Pp3c15_25990	trans-sORF	-	-	Pp3c6_13660,Pp3c6_13600,Pp3c5_14090,Pp3c5_14060	-	-	-	-	-	-
Pp3c15_sORF1168	Pp3c15_2700	trans-sORF	Stop codon excision	TRUE	Pp3c9_2340,Pp3c17_4180,Pp3c22_15660,Pp3c19_11220,Pp3c5_22400,Pp3c6_27580,Pp3c26_10950	1	68	5.7E-29	PANTHER	PTHR43570	-
-	-	-	-	-	-	1	69	6.1E-14	Pfam	PF00171	Aldehyde dehydroge-se family
-	-	-	-	-	-	33	72	8.5E-13	Gene3D	G3DSA:3.40.309.10	-
-	-	-	-	-	-	1	32	1.2E-13	Gene3D	G3DSA:3.40.605.10	-
-	-	-	-	-	-	1	69	4.58E-20	SUPERFAMILY	SSF53720	-
Pp3c15_sORF1292	Pp3c15_3730	cis/trans-sORF	Stop codon excision	TRUE	Pp3c15_3730,Pp3c9_4530	-	-	-	-	-	-
Pp3c15_sORF1482	Pp3c15_5150	trans-sORF	-	-	Pp3c9_14770	-	-	-	-	-	-
Pp3c15_sORF1489	Pp3c15_4901	cis-sORF	Stop codon excision	TRUE	Pp3c15_4901	-	-	-	-	-	-
Pp3c15_sORF1980	Pp3c15_9320	cis-sORF	Start codon excision	TRUE	Pp3c15_9320	-	-	-	-	-	-
Pp3c15_sORF2016	Pp3c15_10200	trans-sORF	-	-	Pp3c4_23110	71	92	-	MobiDBLite	mobidb-lite	consensus disorder prediction
Pp3c15_sORF2117	Pp3c15_10910	cis-sORF	Start codon excision	TRUE	Pp3c15_10910	-	-	-	-	-	-
Pp3c15_sORF2242	Pp3c15_11750	cis-sORF	Stop codon excision	TRUE	Pp3c15_11750	-	-	-	-	-	-
Pp3c15_sORF2274	Pp3c15_12230	cis/trans-sORF	Stop codon excision	TRUE	Pp3c15_12230,Pp3c1_6270,Pp3c1_6272	1	33	-	MobiDBLite	mobidb-lite	consensus disorder prediction
Pp3c15_sORF2409	Pp3c15_13120	trans-sORF	-	-	Pp3c9_18450	1	37	-	MobiDBLite	mobidb-lite	consensus disorder prediction
Pp3c15_sORF2488	Pp3c15_13960	cis-sORF	Stop codon excision	TRUE	Pp3c15_13960	-	-	-	-	-	-
Pp3c16_sORF186	Pp3c16_16970	cis-sORF	Start codon excision	TRUE	Pp3c16_16970	2	60	8.9E-22	PANTHER	PTHR12154	-
-	-	-	-	-	-	4	59	1.8E-19	Pfam	PF08660	Oligosaccharide biosynthesis protein Alg14 like
-	-	-	-	-	-	4	60	1.2E-5	Gene3D	G3DSA:3.40.50.2000	-
Pp3c16_sORF347	Pp3c16_17970	cis-sORF	Stop codon excision	TRUE	Pp3c16_17970	-	-	-	-	-	-
Pp3c16_sORF595	Pp3c16_20090	cis-sORF	Excision,Stop codon excision	TRUE	Pp3c16_20090	-	-	-	-	-	-
Pp3c16_sORF613	Pp3c16_20260	cis/trans-sORF	Start codon excision	TRUE	Pp3c16_20260,Pp3c14_23320,Pp3c9_24570,Pp3c6_7990,Pp3c16_18830	42	90	-	MobiDBLite	mobidb-lite	consensus disorder prediction
Pp3c16_sORF616	Pp3c16_20280	cis-sORF	Stop codon excision	TRUE	Pp3c16_20280	-	-	-	-	-	-
Pp3c16_sORF664	Pp3c16_20850	cis-sORF	Stop codon excision	TRUE	Pp3c16_20850	3	90	2.9E-4	Gene3D	G3DSA:3.40.50.1820	-
Pp3c16_sORF730	Pp3c16_21480	trans-sORF	-	-	Pp3c25_13600,Pp3c11_24020,Pp3c10_25470,Pp3c16_20050,Pp3c14_10060,Pp3c18_9180,Pp3c4_11670,Pp3c11_24230,Pp3c10_20260,Pp3c18_12630,Pp3c1_21050,Pp3c14_3550,Pp3c1_30900,Pp3c11_6870,Pp3c7_1290,Pp3c18_5120,Pp3c10_11000,Pp3c3_7040,Pp3c19_18380,Pp3c13_1180,Pp3c18_9170,Pp3c12_23490,Pp3c5_15380,Pp3c21_18220	1	87	5.5E-12	Gene3D	G3DSA:1.10.510.10	-
-	-	-	-	-	-	2	76	3.16E-10	SUPERFAMILY	SSF56112	-
-	-	-	-	-	-	2	62	1.8E-6	Pfam	PF07714	Protein tyrosine ki-se
Pp3c16_sORF736	Pp3c16_21460	cis-sORF	Start codon excision,Stop codon excision	TRUE	Pp3c16_21460	1	55	1.1E-7	Gene3D	G3DSA:3.40.525.10	-
-	-	-	-	-	-	6	42	6.15E-9	SUPERFAMILY	SSF52087	-
-	-	-	-	-	-	5	42	3.8E-8	Pfam	PF00650	CRAL/TRIO domain
Pp3c16_sORF784	Pp3c16_21860	cis-sORF	Start codon excision,Stop codon excision	TRUE	Pp3c16_21860	-	-	-	-	-	-
Pp3c16_sORF958	Pp3c16_23780	cis-sORF	Stop codon excision	TRUE	Pp3c16_23780	-	-	-	-	-	-
Pp3c16_sORF1068	Pp3c16_25190	cis-sORF	Stop codon excision	TRUE	Pp3c16_25190	47	67	-	MobiDBLite	mobidb-lite	consensus disorder prediction
Pp3c16_sORF1109	Pp3c16_25660	cis-sORF	Start codon excision	TRUE	Pp3c16_25660	52	89	3.9E-16	Gene3D	G3DSA:2.70.40.10	-
-	-	-	-	-	-	4	51	6.7E-22	Gene3D	G3DSA:2.70.40.10	-
-	-	-	-	-	-	6	60	1.58742E-17	CDD	cd07557	trimeric_dUTPase
-	-	-	-	-	-	9	88	4.2E-29	Pfam	PF00692	dUTPase
-	-	-	-	-	-	8	89	3.4E-31	SUPERFAMILY	SSF51283	-
-	-	-	-	-	-	7	88	1.7E-33	TIGRFAM	TIGR00576	dut: dUTP diphosphatase
-	-	-	-	-	-	6	88	7.3E-39	PANTHER	PTHR11241:SF9	-
-	-	-	-	-	-	6	88	7.3E-39	PANTHER	PTHR11241	-
Pp3c16_sORF1165	Pp3c16_26100	trans-sORF	-	-	Pp3c6_13660,Pp3c6_13600,Pp3c5_14090,Pp3c5_14060	9	68	9.1E-20	PANTHER	PTHR14493	-
-	-	-	-	-	-	9	68	9.1E-20	PANTHER	PTHR14493:SF59	-
Pp3c16_sORF1167	ID=XLOC_012436|TCONS_00021068	trans-sORF	-	-	Pp3c5_29220,Pp3s76_20,Pp3c6_30010	1	33	5.0	ProSiteProfiles	PS51257	Prokaryotic membrane lipoprotein lipid attachment site profile.
Pp3c16_sORF1305	Pp3c16_3300	cis/trans-sORF	Stop codon excision	TRUE	Pp3c16_3300,Pp3c23_18810	-	-	-	-	-	-
Pp3c16_sORF1394	Pp3c16_270	trans-sORF	Stop codon excision	TRUE	Pp3c5_10130,Pp3c6_23000	1	23	-	MobiDBLite	mobidb-lite	consensus disorder prediction
Pp3c16_sORF1396	Pp3c16_4610	trans-sORF	-	-	Pp3c27_5070,Pp3c5_1290	1	53	-	MobiDBLite	mobidb-lite	consensus disorder prediction
Pp3c16_sORF1485	Pp3c16_5650	cis-sORF	Stop codon excision	TRUE	Pp3c16_5650	-	-	-	-	-	-
Pp3c16_sORF1548	Pp3c16_5700	cis/trans-sORF	Stop codon excision	TRUE	Pp3c16_5700,Pp3c27_2710	-	-	-	-	-	-
Pp3c16_sORF1710	Pp3c16_7200	cis/trans-sORF	Stop codon excision	TRUE	Pp3c16_7200,Pp3c25_30,Pp3c5_15680	11	74	4.4E-27	PANTHER	PTHR33737	-
-	-	-	-	-	-	11	74	4.4E-27	PANTHER	PTHR33737:SF5	-
Pp3c16_sORF1821	Pp3c16_7930	cis/trans-sORF	Stop codon excision	TRUE	Pp3c16_7930,Pp3c25_5260,Pp3c1_32750,Pp3c24_2610,Pp3c23_13310,Pp3c16_11920,Pp3c24_10130,Pp3c5_12990	24	82	1.8E-21	PANTHER	PTHR12064:SF50	-
-	-	-	-	-	-	24	82	1.8E-21	PANTHER	PTHR12064	-
Pp3c16_sORF1970	Pp3c16_8870	cis/trans-sORF	Stop codon excision	TRUE	Pp3c16_8870,Pp3c5_15690	16	47	-	MobiDBLite	mobidb-lite	consensus disorder prediction
Pp3c16_sORF1978	Pp3c16_9230	cis/trans-sORF	Start codon excision	TRUE	Pp3c16_9230,Pp3c5_16090,Pp3c6_10590	-	-	-	-	-	-
Pp3c16_sORF2129	Pp3c16_810	cis-sORF	Stop codon excision	TRUE	Pp3c16_810	-	-	-	-	-	-
Pp3c16_sORF2344	Pp3c16_980	cis/trans-sORF	Start codon excision,Stop codon excision	TRUE	Pp3c16_980,Pp3c27_3300,Pp3c17_21130	57	77	-	Coils	Coil	-
Pp3c16_sORF2442	Pp3c16_13150	trans-sORF	Stop codon excision	TRUE	Pp3c16_13170,Pp3c5_750	11	77	4.9E-16	PANTHER	PTHR11247:SF33	-
-	-	-	-	-	-	11	77	4.9E-16	PANTHER	PTHR11247	-
Pp3c16_sORF2652	Pp3c16_15390	trans-sORF	Stop codon excision	TRUE	Pp3c5_7620,Pp3c21_9810	1	57	2.9E-18	PANTHER	PTHR43272:SF21	-
-	-	-	-	-	-	1	57	2.9E-18	PANTHER	PTHR43272	-
Pp3c17_sORF109	Pp3c17_15230	cis/trans-sORF	Stop codon excision	TRUE	Pp3c17_15230,Pp3c14_19630	12	49	1.57E-7	SUPERFAMILY	SSF81383	-
-	-	-	-	-	-	9	50	1.9E-7	Gene3D	G3DSA:1.20.1280.50	-
-	-	-	-	-	-	22	50	1.1E-5	Pfam	PF12937	F-box-like
Pp3c17_sORF199	Pp3c17_15880	trans-sORF	Stop codon excision	TRUE	Pp3c14_20990,Pp3c1_30640	1	63	9.7E-16	PANTHER	PTHR30618:SF18	-
-	-	-	-	-	-	1	76	9.3E-12	Pfam	PF02133	Permease for cytosine/purines, uracil, thiamine, allantoin
-	-	-	-	-	-	1	63	9.7E-16	PANTHER	PTHR30618	-
Pp3c17_sORF322	Pp3c17_1520	trans-sORF	-	-	Pp3c6_3710,Pp3c24_4390	-	-	-	-	-	-
Pp3c17_sORF382	Pp3c17_17252	trans-sORF	-	-	Pp3c14_15490	-	-	-	-	-	-
Pp3c17_sORF448	Pp3c17_17600	trans-sORF	-	-	Pp3c14_15670	1	29	-	MobiDBLite	mobidb-lite	consensus disorder prediction
-	-	-	-	-	-	44	65	-	MobiDBLite	mobidb-lite	consensus disorder prediction
Pp3c17_sORF483	Pp3c17_17830	trans-sORF	-	-	Pp3c14_20570	-	-	-	-	-	-
Pp3c17_sORF538	Pp3c17_18370	cis/trans-sORF	Stop codon excision	TRUE	Pp3c17_18370,Pp3c14_20430	-	-	-	-	-	-
Pp3c17_sORF560	Pp3c17_18350	cis-sORF	Stop codon excision	TRUE	Pp3c17_18350	-	-	-	-	-	-
Pp3c17_sORF562	Pp3c17_18350	trans-sORF	Stop codon excision	TRUE	Pp3c4_14860,Pp3c3_14330,Pp3c10_1820,Pp3c7_14360,Pp3c1_18110,Pp3c1_13060,Pp3c2_24620,Pp3c3_28310,Pp3c26_9330,Pp3c11_15920,Pp3c7_14540,Pp3c5_4460	8	62	5.5E-11	Pfam	PF01055	Glycosyl hydrolases family 31
-	-	-	-	-	-	3	63	2.9E-21	PANTHER	PTHR22762:SF105	-
-	-	-	-	-	-	3	63	2.9E-21	PANTHER	PTHR22762	-
-	-	-	-	-	-	1	63	7.7E-16	Gene3D	G3DSA:3.20.20.80	-
Pp3c17_sORF563	Pp3c17_18350	trans-sORF	Truncation	TRUE	Pp3c4_14860,Pp3c3_14330,Pp3c1_13060,Pp3c2_24620,Pp3c10_1820,Pp3c7_14360,Pp3c7_14540,Pp3c3_28310,Pp3c26_9330,Pp3c1_18110,Pp3c11_15920	1	73	1.8E-6	Gene3D	G3DSA:3.20.20.80	-
Pp3c17_sORF620	Pp3c17_19170	cis/trans-sORF	Excision,Start codon excision,Stop codon excision	TRUE	Pp3c17_19170,Pp3c2_4740	-	-	-	-	-	-
Pp3c17_sORF636	Pp3c17_19250	cis-sORF	Stop codon excision	TRUE	Pp3c17_19250	-	-	-	-	-	-
Pp3c17_sORF777	Pp3c17_20230	cis-sORF	Start codon excision	TRUE	Pp3c17_20230	-	-	-	-	-	-
Pp3c17_sORF822	Pp3c17_20470	cis/trans-sORF	Stop codon excision	TRUE	Pp3c17_20470,Pp3c1_41070	1	41	2.5E-15	PANTHER	PTHR35502:SF4	-
-	-	-	-	-	-	1	41	2.5E-15	PANTHER	PTHR35502	-
Pp3c17_sORF891	Pp3c17_21350	cis-sORF	Stop codon excision	TRUE	Pp3c17_21350	-	-	-	-	-	-
Pp3c17_sORF1015	Pp3c17_22120	trans-sORF	Start codon excision	TRUE	Pp3c14_22910	5	49	1.5E-12	PANTHER	PTHR22814:SF246	-
-	-	-	-	-	-	5	49	1.5E-12	PANTHER	PTHR22814	-
Pp3c17_sORF1133	Pp3c17_23220	cis-sORF	Start codon excision	TRUE	Pp3c17_23220	1	33	-	MobiDBLite	mobidb-lite	consensus disorder prediction
Pp3c17_sORF1287	Pp3c17_2560	cis-sORF	Stop codon excision	TRUE	Pp3c17_2560	-	-	-	-	-	-
Pp3c17_sORF1389	Pp3c17_3610	trans-sORF	Stop codon excision	TRUE	Pp3c15_3710	37	64	1.4E-6	Pfam	PF02201	SWIB/MDM2 domain
-	-	-	-	-	-	25	64	2.9E-6	Gene3D	G3DSA:1.10.245.10	-
-	-	-	-	-	-	28	64	3.92E-6	SUPERFAMILY	SSF47592	-
Pp3c17_sORF1422	Pp3c17_4070	trans-sORF	-	-	Pp3c24_14510,Pp3c24_14480	14	88	-	MobiDBLite	mobidb-lite	consensus disorder prediction
Pp3c17_sORF1539	Pp3c17_5040	cis-sORF	Stop codon excision	TRUE	Pp3c17_5040	-	-	-	-	-	-
Pp3c17_sORF1616	Pp3c17_5820	trans-sORF	Stop codon excision	TRUE	Pp3c17_5790	-	-	-	-	-	-
Pp3c17_sORF1672	ID=XLOC_028325|TCONS_00048481	trans-sORF	-	-	Pp3c1_10400	-	-	-	-	-	-
Pp3c17_sORF1677	Pp3c17_6410	cis-sORF	Stop codon excision	TRUE	Pp3c17_6410	-	-	-	-	-	-
Pp3c17_sORF1940	Pp3c17_8980	trans-sORF	Stop codon excision,Truncation	FALSE	Pp3c21_8780	-	-	-	-	-	-
Pp3c17_sORF2017	Pp3c17_10030	trans-sORF	Stop codon excision	TRUE	Pp3c6_16700,Pp3c5_10200	-	-	-	-	-	-
Pp3c17_sORF2050	Pp3c17_710	trans-sORF	-	-	Pp3c17_680	-	-	-	-	-	-
Pp3c17_sORF2129	Pp3c17_10970	trans-sORF	-	-	Pp3c14_10860	-	-	-	-	-	-
Pp3c17_sORF2438	Pp3c17_13810	cis-sORF	Stop codon excision	TRUE	Pp3c17_13810	-	-	-	-	-	-
Pp3c18_sORF373	Pp3c18_17510	cis-sORF	Stop codon excision	TRUE	Pp3c18_17510	-	-	-	-	-	-
Pp3c18_sORF414	Pp3c18_18010	cis/trans-sORF	Stop codon excision	TRUE	Pp3c18_18010,Pp3c19_3120	-	-	-	-	-	-
Pp3c18_sORF486	Pp3c18_18840	cis-sORF	Stop codon excision	TRUE	Pp3c18_18840	-	-	-	-	-	-
Pp3c18_sORF642	Pp3c18_20150	trans-sORF	Stop codon excision	TRUE	Pp3c18_20160	-	-	-	-	-	-
Pp3c18_sORF673	Pp3c18_20310	cis-sORF	Stop codon excision	TRUE	Pp3c18_20310	-	-	-	-	-	-
Pp3c18_sORF796	Pp3c18_21560	trans-sORF	-	-	Pp3c1_17909	-	-	-	-	-	-
Pp3c18_sORF799	Pp3c18_21590	trans-sORF	-	-	Pp3c15_6750,Pp3c9_7400,Pp3c9_11130	-	-	-	-	-	-
Pp3c18_sORF808	Pp3c18_21640	trans-sORF	-	-	Pp3c23_14390	1	40	-	MobiDBLite	mobidb-lite	consensus disorder prediction
Pp3c18_sORF942	Pp3c18_1570	trans-sORF	-	-	Pp3c26_6160	1	21	-	MobiDBLite	mobidb-lite	consensus disorder prediction
Pp3c18_sORF1014	Pp3c18_2170	cis-sORF	Stop codon excision	TRUE	Pp3c18_2170	-	-	-	-	-	-
Pp3c18_sORF1319	Pp3c18_5710	trans-sORF	-	-	Pp3c18_4930	-	-	-	-	-	-
Pp3c18_sORF1334	Pp3c18_5860	trans-sORF	-	-	Pp3c22_17730	-	-	-	-	-	-
Pp3c18_sORF1516	Pp3c18_7980	cis-sORF	Start codon excision	TRUE	Pp3c18_7980	50	75	-	MobiDBLite	mobidb-lite	consensus disorder prediction
Pp3c18_sORF1751	Pp3c18_10490	cis-sORF	Stop codon excision	TRUE	Pp3c18_10490	-	-	-	-	-	-
Pp3c18_sORF1896	Pp3c18_11850	trans-sORF	-	-	Pp3c23_10310	6	63	5.9E-4	Gene3D	G3DSA:3.40.50.1820	-
Pp3c19_sORF92	Pp3c19_15990	cis-sORF	Stop codon excision	TRUE	Pp3c19_15990	-	-	-	-	-	-
Pp3c19_sORF219	Pp3c19_17220	trans-sORF	Start codon excision	TRUE	Pp3c19_17230,Pp3c2_22140	27	77	-	MobiDBLite	mobidb-lite	consensus disorder prediction
-	-	-	-	-	-	37	64	-	Coils	Coil	-
Pp3c19_sORF239	Pp3c19_17570	cis/trans-sORF	Stop codon excision	TRUE	Pp3c19_17570,Pp3c21_14540	-	-	-	-	-	-
Pp3c19_sORF420	Pp3c19_19330	cis/trans-sORF	Start codon excision	TRUE	Pp3c19_19330,Pp3c1_22470,Pp3c3_15510	1	56	6.2E-27	PANTHER	PTHR43452	-
-	-	-	-	-	-	1	56	6.2E-27	PANTHER	PTHR43452:SF5	-
-	-	-	-	-	-	2	55	4.84E-5	SUPERFAMILY	SSF52518	-
Pp3c19_sORF537	Pp3c19_20510	cis/trans-sORF	Stop codon excision	TRUE	Pp3c19_20510,Pp3c10_21740	1	23	-	MobiDBLite	mobidb-lite	consensus disorder prediction
-	-	-	-	-	-	28	96	8.93E-9	SUPERFAMILY	SSF51197	-
-	-	-	-	-	-	24	97	2.5E-9	Gene3D	G3DSA:2.60.120.330	-
Pp3c19_sORF564	Pp3c19_20720	cis-sORF	Start codon excision,Stop codon excision	TRUE	Pp3c19_20720	-	-	-	-	-	-
Pp3c19_sORF588	Pp3c19_20789	trans-sORF	-	-	Pp3c21_16010	-	-	-	-	-	-
Pp3c19_sORF609	Pp3c19_20930	trans-sORF	-	-	Pp3c22_2620	-	-	-	-	-	-
Pp3c19_sORF757	Pp3c19_22930	cis-sORF	Excision,Stop codon excision	TRUE	Pp3c19_22930	-	-	-	-	-	-
Pp3c19_sORF771	ID=XLOC_027095|TCONS_00046356	trans-sORF	-	-	Pp3s421_10,Pp3c11_10,Pp3c19_23110,Pp3c6_29980	-	-	-	-	-	-
Pp3c19_sORF780	Pp3c19_23130	trans-sORF	-	-	Pp3c5_29220,Pp3s76_20,Pp3c6_30010	-	-	-	-	-	-
Pp3c19_sORF797	Pp3c19_2940	cis/trans-sORF	Stop codon excision	TRUE	Pp3c19_2940,Pp3c22_8210,Pp3c22_8217,Pp3c21_2850,Pp3c18_20920,Pp3c10_13030,Pp3c3_23200,Pp3c4_20290,Pp3c4_16540,Pp3c13_23440,Pp3c3_14670,Pp3c12_10900,Pp3c2_310,Pp3c14_26270,Pp3c17_23560,Pp3c13_9170,Pp3c26_3290,Pp3c12_11150,Pp3c3_34900,Pp3c3_10940,Pp3c26_3820,Pp3c4_23130,Pp3c4_6870	57	82	2.3E-8	TIGRFAM	TIGR01557	myb_SHAQKYF: myb-like D--binding domain, SHAQKYF class
-	-	-	-	-	-	54	85	4.8E-11	Gene3D	G3DSA:1.10.10.60	-
-	-	-	-	-	-	57	81	6.27E-5	SUPERFAMILY	SSF46689	-
-	-	-	-	-	-	1	82	2.3E-27	PANTHER	PTHR31499	-
-	-	-	-	-	-	1	82	2.3E-27	PANTHER	PTHR31499:SF14	-
Pp3c19_sORF867	Pp3c19_3460	trans-sORF	Start codon excision	TRUE	Pp3c22_2470,Pp3c21_6460,Pp3c3_27720,Pp3c6_17670,Pp3c27_1960,Pp3c16_16680	1	49	4.7E-16	PANTHER	PTHR32227:SF159	-
-	-	-	-	-	-	1	53	6.8E-9	Gene3D	G3DSA:3.20.20.80	-
-	-	-	-	-	-	1	49	4.7E-16	PANTHER	PTHR32227	-
Pp3c19_sORF943	Pp3c19_3840	cis/trans-sORF	Stop codon excision	TRUE	Pp3c19_3840,Pp3c22_7690,Pp3c18_20200,Pp3c10_6670,Pp3c4_29460	16	49	2.0E-8	Pfam	PF01070	FMN-dependent dehydroge-se
-	-	-	-	-	-	4	50	1.5E-22	PANTHER	PTHR10578:SF89	-
-	-	-	-	-	-	5	62	3.4E-13	Gene3D	G3DSA:3.20.20.70	-
-	-	-	-	-	-	4	50	1.5E-22	PANTHER	PTHR10578	-
-	-	-	-	-	-	6	52	1.92E-9	SUPERFAMILY	SSF51395	-
Pp3c19_sORF965	Pp3c19_4330	cis-sORF	Stop codon excision	TRUE	Pp3c19_4330	-	-	-	-	-	-
Pp3c19_sORF973	Pp3c19_4630	cis/trans-sORF	Stop codon excision	TRUE	Pp3c19_4630,Pp3c18_9140	3	57	1.5E-22	PANTHER	PTHR31168:SF11	-
-	-	-	-	-	-	3	57	1.5E-22	PANTHER	PTHR31168	-
-	-	-	-	-	-	11	55	7.6E-13	Pfam	PF04654	Protein of unknown function, DUF599
Pp3c19_sORF1072	Pp3c19_4900	cis-sORF	Stop codon excision	TRUE	Pp3c19_4900	-	-	-	-	-	-
Pp3c19_sORF1073	Pp3c19_4900	cis/trans-sORF	Stop codon excision	TRUE	Pp3c19_4900,Pp3c18_19850,Pp3c22_3910,Pp3c21_1680,Pp3c18_19990,Pp3c6_10740,Pp3c5_20890,Pp3c16_8090	6	91	8.1E-32	PANTHER	PTHR31945	-
-	-	-	-	-	-	6	91	8.1E-32	PANTHER	PTHR31945:SF26	-
Pp3c19_sORF1085	Pp3c19_5170	cis-sORF	Stop codon excision	TRUE	Pp3c19_5170	-	-	-	-	-	-
Pp3c19_sORF1284	Pp3c19_1140	trans-sORF	-	-	Pp3c23_18430	-	-	-	-	-	-
Pp3c19_sORF1373	Pp3c19_8160	trans-sORF	-	-	Pp3c26_8800	-	-	-	-	-	-
Pp3c19_sORF1405	Pp3c19_1330	trans-sORF	-	-	Pp3c5_14060,Pp3c5_14090,Pp3c6_13660,Pp3c6_13600,Pp3c20_23770	1	40	3.5E-17	PANTHER	PTHR14493:SF57	-
-	-	-	-	-	-	1	40	3.5E-17	PANTHER	PTHR14493	-
Pp3c19_sORF1471	Pp3c19_8920	trans-sORF	-	-	Pp3c22_20660	2	22	-	Coils	Coil	-
Pp3c19_sORF1501	Pp3c19_9270	trans-sORF	-	-	Pp3c20_459	-	-	-	-	-	-
Pp3c19_sORF1590	Pp3c19_9960	cis-sORF	Stop codon excision	TRUE	Pp3c19_9960	-	-	-	-	-	-
Pp3c19_sORF1593	Pp3c19_9970	cis-sORF	Stop codon excision	TRUE	Pp3c19_9970	-	-	-	-	-	-
Pp3c19_sORF1704	Pp3c19_11600	cis-sORF	Stop codon excision	TRUE	Pp3c19_11600	-	-	-	-	-	-
Pp3c19_sORF1767	Pp3c19_12350	trans-sORF	-	-	Pp3c22_16110	-	-	-	-	-	-
Pp3c19_sORF1895	Pp3c19_13340	trans-sORF	-	-	Pp3c19_20280,Pp3c1_13910,Pp3c11_11040	1	64	2.9E-4	Gene3D	G3DSA:3.30.497.10	-
Pp3c19_sORF1901	Pp3c19_13350	cis-sORF	Start codon excision	TRUE	Pp3c19_13350	-	-	-	-	-	-
Pp3c20_sORF58	Pp3c20_1890	cis-sORF	Stop codon excision	TRUE	Pp3c20_1890	1	21	-	MobiDBLite	mobidb-lite	consensus disorder prediction
Pp3c20_sORF254	Pp3c20_16710	trans-sORF	-	-	Pp3c27_8610	-	-	-	-	-	-
Pp3c20_sORF387	Pp3c20_17750	cis/trans-sORF	Stop codon excision	TRUE	Pp3c20_17750,Pp3c24_4380	24	73	7.2E-9	Pfam	PF04724	Glycosyltransferase family 17
Pp3c20_sORF602	Pp3c20_20250	cis/trans-sORF	Start codon excision	TRUE	Pp3c20_20250,Pp3c10_23730	39	70	-	MobiDBLite	mobidb-lite	consensus disorder prediction
Pp3c20_sORF804	ID=XLOC_006977|TCONS_00011867	trans-sORF	-	-	Pp3c24_14230,Pp3c20_8210	-	-	-	-	-	-
Pp3c20_sORF936	Pp3c20_23370	cis-sORF	Stop codon excision	TRUE	Pp3c20_23370	-	-	-	-	-	-
Pp3c20_sORF993	Pp3c20_23750	trans-sORF	-	-	Pp3c19_23110,Pp3c6_29980,Pp3c11_10,Pp3s421_10	-	-	-	-	-	-
Pp3c20_sORF1096	Pp3c20_294	trans-sORF	-	-	Pp3c20_110,Pp3c26_30	-	-	-	-	-	-
Pp3c20_sORF1228	Pp3c20_5190	cis-sORF	Excision,Stop codon excision	TRUE	Pp3c20_5190	3	66	1.3E-9	Pfam	PF06963	Ferroportin1 (FPN1)
Pp3c20_sORF1231	Pp3c20_5230	trans-sORF	Stop codon excision	TRUE	Pp3c20_5490	-	-	-	-	-	-
Pp3c20_sORF1246	Pp3c20_5410	cis-sORF	Stop codon excision	TRUE	Pp3c20_5410	-	-	-	-	-	-
Pp3c20_sORF1322	Pp3c20_5870	trans-sORF	-	-	Pp3c23_14680,Pp3c24_15330,Pp3c3_35720,Pp3c8_3250,Pp3c1_42760,Pp3c17_17940,Pp3c14_25670,Pp3c20_18860,Pp3c3_32050	4	39	1.2E-17	PANTHER	PTHR10992:SF948	-
-	-	-	-	-	-	4	39	1.2E-17	PANTHER	PTHR10992	-
Pp3c20_sORF1414	Pp3c20_6810	trans-sORF	Stop codon excision	FALSE	Pp3c23_15540,Pp3c23_6860,Pp3c20_9770,Pp3c8_19190	1	35	1.6E-6	Pfam	PF01849	-C domain
Pp3c20_sORF1690	ID=XLOC_035031|TCONS_00059963	trans-sORF	-	-	Pp3c23_7750	-	-	-	-	-	-
Pp3c20_sORF1742	Pp3c20_9600	cis-sORF	Stop codon excision	TRUE	Pp3c20_9600	-	-	-	-	-	-
Pp3c20_sORF1755	Pp3c20_9940	trans-sORF	-	-	Pp3c18_13490,Pp3c7_6440	1	53	2.8E-14	PANTHER	PTHR11014:SF120	-
-	-	-	-	-	-	1	53	2.8E-14	PANTHER	PTHR11014	-
Pp3c20_sORF1766	Pp3c20_9930	cis/trans-sORF	Stop codon excision	TRUE	Pp3c20_9930,Pp3c24_19290,Pp3c8_22080,Pp3c3_20420,Pp3c4_19490,Pp3c12_10860	4	22	5.2E-12	PRINTS	PR00390	Phospholipase C sig-ture
-	-	-	-	-	-	30	50	5.2E-12	PRINTS	PR00390	Phospholipase C sig-ture
-	-	-	-	-	-	1	61	3.0E-21	Pfam	PF00388	Phosphatidylinositol-specific phospholipase C, X domain
-	-	-	-	-	-	1	60	3.14E-25	SUPERFAMILY	SSF51695	-
-	-	-	-	-	-	1	61	4.5E-29	PANTHER	PTHR10336	-
-	-	-	-	-	-	1	60	20.832	ProSiteProfiles	PS50007	Phosphatidylinositol-specific phospholipase X-box domain profile.
-	-	-	-	-	-	1	61	4.5E-29	PANTHER	PTHR10336:SF116	-
-	-	-	-	-	-	1	61	5.7E-4	SMART	SM00148	-
-	-	-	-	-	-	1	61	3.9E-22	Gene3D	G3DSA:3.20.20.190	-
Pp3c20_sORF1968	Pp3c20_11610	cis/trans-sORF	Stop codon excision	TRUE	Pp3c20_11610,Pp3c17_20120	1	28	-	MobiDBLite	mobidb-lite	consensus disorder prediction
Pp3c20_sORF2071	Pp3c20_12590	trans-sORF	Start codon excision	TRUE	Pp3c15_8980,Pp3c8_25510,Pp3c24_12980,Pp3c24_5410,Pp3c24_5540,Pp3c17_8990,Pp3c7_27360,Pp3c23_11820,Pp3c19_970,Pp3c12_880,Pp3c26_15490,Pp3c26_15510,Pp3c26_15540,Pp3c17_80,Pp3c20_23930,Pp3c2_38340,Pp3c3_180	7	66	5.2E-8	Pfam	PF00069	Protein ki-se domain
-	-	-	-	-	-	6	64	8.36E-10	SUPERFAMILY	SSF56112	-
-	-	-	-	-	-	1	96	10.733	ProSiteProfiles	PS50011	Protein ki-se domain profile.
-	-	-	-	-	-	5	96	2.3E-10	Gene3D	G3DSA:1.10.510.10	-
Pp3c20_sORF2100	Pp3c20_25	trans-sORF	-	-	Pp3c20_88	20	96	-	MobiDBLite	mobidb-lite	consensus disorder prediction
Pp3c20_sORF2143	Pp3c20_13310	cis/trans-sORF	Start codon excision	TRUE	Pp3c20_13310,Pp3c8_15630	13	82	4.3E-19	PANTHER	PTHR15430	-
-	-	-	-	-	-	13	82	4.3E-19	PANTHER	PTHR15430:SF4	-
Pp3c21_sORF2	Pp3c21_15770	trans-sORF	-	-	Pp3c18_5250	-	-	-	-	-	-
Pp3c21_sORF66	Pp3c21_980	trans-sORF	-	-	Pp3c17_21720,Pp3s203_40,Pp3c17_18970,Pp3c13_2610,Pp3c13_1180	1	39	7.3E-4	Gene3D	G3DSA:3.80.20.20	-
Pp3c21_sORF206	Pp3c21_17650	cis-sORF	Stop codon excision	TRUE	Pp3c21_17650	-	-	-	-	-	-
Pp3c21_sORF472	Pp3c21_19980	trans-sORF	-	-	Pp3c25_3928	-	-	-	-	-	-
Pp3c21_sORF803	Pp3c21_4250	trans-sORF	-	-	Pp3c21_2740,Pp3c21_2780,Pp3c21_2741	-	-	-	-	-	-
Pp3c21_sORF811	Pp3c21_4710	trans-sORF	-	-	Pp3c22_2440,Pp3c18_19210,Pp3c3_27710,Pp3c19_3524,Pp3c19_3520,Pp3c5_7300	1	47	5.9E-20	PANTHER	PTHR31355	-
-	-	-	-	-	-	1	47	5.9E-20	PANTHER	PTHR31355:SF12	-
Pp3c21_sORF814	Pp3c21_4710	trans-sORF	-	-	Pp3c18_19210,Pp3c22_2440	22	63	-	MobiDBLite	mobidb-lite	consensus disorder prediction
Pp3c21_sORF817	Pp3c21_4720	trans-sORF	Stop codon excision	TRUE	Pp3c18_19210	-	-	-	-	-	-
Pp3c21_sORF820	Pp3c21_4720	trans-sORF	Start codon excision	TRUE	Pp3c18_19210,Pp3c22_2440	3	44	1.0E-15	PANTHER	PTHR31355:SF12	-
-	-	-	-	-	-	3	44	1.0E-15	PANTHER	PTHR31355	-
Pp3c21_sORF1032	Pp3c21_7160	trans-sORF	Stop codon excision	TRUE	Pp3c18_15360,Pp3c18_14130,Pp3c9_2300,Pp3c15_2670	1	73	3.3E-17	PANTHER	PTHR22849	-
-	-	-	-	-	-	1	73	3.3E-17	PANTHER	PTHR22849:SF60	-
Pp3c21_sORF1115	Pp3c21_7550	trans-sORF	-	-	Pp3c21_4670	32	54	-	MobiDBLite	mobidb-lite	consensus disorder prediction
Pp3c21_sORF1190	Pp3c21_8100	cis-sORF	Excision,Stop codon excision	TRUE	Pp3c21_8100	-	-	-	-	-	-
Pp3c21_sORF1281	Pp3c21_8398	trans-sORF	-	-	Pp3c2_2526	-	-	-	-	-	-
Pp3c21_sORF1385	Pp3c21_9710	cis/trans-sORF	Stop codon excision	TRUE	Pp3c21_9710,Pp3c8_22620	5	95	4.4E-22	Gene3D	G3DSA:3.40.50.140	-
-	-	-	-	-	-	6	92	1.57E-14	SUPERFAMILY	SSF56712	-
-	-	-	-	-	-	6	95	4.9E-36	PANTHER	PTHR11390:SF28	-
-	-	-	-	-	-	6	95	4.9E-36	PANTHER	PTHR11390	-
Pp3c21_sORF1632	Pp3c21_11590	cis/trans-sORF	Excision,Start codon excision	TRUE	Pp3c21_11590,Pp3c21_11570,Pp3c21_11620	1	62	8.4E-17	PANTHER	PTHR33287:SF5	-
-	-	-	-	-	-	1	62	8.4E-17	PANTHER	PTHR33287	-
Pp3c21_sORF1648	Pp3c21_11420	cis/trans-sORF	Stop codon excision	TRUE	Pp3c21_11420,Pp3c18_12190	-	-	-	-	-	-
Pp3c21_sORF1818	Pp3c21_13310	cis-sORF	Stop codon excision	TRUE	Pp3c21_13310	-	-	-	-	-	-
Pp3c21_sORF1880	Pp3c21_14179	trans-sORF	-	-	Pp3c10_50	-	-	-	-	-	-
Pp3c21_sORF1882	Pp3c21_14179	trans-sORF	-	-	Pp3c10_50	-	-	-	-	-	-
Pp3c21_sORF2060	Pp3c21_900	cis-sORF	Stop codon excision	TRUE	Pp3c21_900	-	-	-	-	-	-
Pp3c22_sORF74	Pp3c22_16170	trans-sORF	Start codon excision	TRUE	Pp3c19_14510	-	-	-	-	-	-
Pp3c22_sORF79	Pp3c22_16110	cis-sORF	Start codon excision	TRUE	Pp3c22_16110	1	20	-	MobiDBLite	mobidb-lite	consensus disorder prediction
Pp3c22_sORF210	Pp3c22_17570	cis/trans-sORF	Stop codon excision	TRUE	Pp3c22_17570,Pp3c11_570	3	61	3.7E-21	PANTHER	PTHR24320:SF120	-
-	-	-	-	-	-	3	61	3.7E-21	PANTHER	PTHR24320	-
Pp3c22_sORF246	Pp3c22_17540	trans-sORF	Stop codon excision	TRUE	Pp3c2_30610,Pp3c2_32410,Pp3c13_9000,Pp3c10_21810,Pp3c21_7670,Pp3c21_7680,Pp3c24_13110,Pp3c19_13690,Pp3c14_11870,Pp3c26_14610,Pp3c1_18940,Pp3c1_18830,Pp3c26_2420	2	81	2.2E-14	SUPERFAMILY	SSF48557	-
-	-	-	-	-	-	1	82	5.8E-26	PANTHER	PTHR10362	-
-	-	-	-	-	-	1	50	8.8E-6	Gene3D	G3DSA:1.20.200.10	-
-	-	-	-	-	-	51	82	4.8E-9	Gene3D	G3DSA:1.10.274.20	-
-	-	-	-	-	-	1	82	5.8E-26	PANTHER	PTHR10362:SF22	-
Pp3c22_sORF333	Pp3c22_18570	cis-sORF	Stop codon excision	TRUE	Pp3c22_18570	-	-	-	-	-	-
Pp3c22_sORF427	Pp3c22_19412	cis/trans-sORF	Start codon excision	TRUE	Pp3c22_19410,Pp3c22_19412	-	-	-	-	-	-
Pp3c22_sORF704	Pp3c22_22010	trans-sORF	-	-	Pp3c7_22400,Pp3c1_3170,Pp3c11_4130,Pp3c2_29600	-	-	-	-	-	-
Pp3c22_sORF812	Pp3c22_1930	cis-sORF	Stop codon excision	TRUE	Pp3c22_1930	-	-	-	-	-	-
Pp3c22_sORF990	Pp3c22_3916	trans-sORF	-	-	Pp3c19_4890	-	-	-	-	-	-
Pp3c22_sORF1236	Pp3c22_6940	cis/trans-sORF	Stop codon excision	TRUE	Pp3c22_6940,Pp3c19_9120	41	73	-	MobiDBLite	mobidb-lite	consensus disorder prediction
Pp3c22_sORF1252	ID=XLOC_003174|TCONS_00005387	trans-sORF	-	-	Pp3c18_16020	-	-	-	-	-	-
Pp3c22_sORF1345	Pp3c22_7958	cis-sORF	Stop codon excision	TRUE	Pp3c22_7958	2	90	1.1E-9	Gene3D	G3DSA:3.10.120.10	-
-	-	-	-	-	-	4	41	6.67E-10	SUPERFAMILY	SSF55856	-
-	-	-	-	-	-	9	38	8.1E-6	Pfam	PF00173	Cytochrome b5-like Heme/Steroid binding domain
-	-	-	-	-	-	5	46	1.4E-15	PANTHER	PTHR21281	-
-	-	-	-	-	-	5	92	11.736	ProSiteProfiles	PS50255	Cytochrome b5 family, heme-binding domain profile.
Pp3c22_sORF1573	Pp3c22_9580	cis-sORF	Stop codon excision	TRUE	Pp3c22_9580	-	-	-	-	-	-
Pp3c22_sORF1867	Pp3c22_12960	cis/trans-sORF	Stop codon excision	TRUE	Pp3c13_13170,Pp3c22_12960,Pp3c15_12410,Pp3c9_5310,Pp3c9_5280,Pp3c4_22100	14	58	2.2E-4	Pfam	PF06309	Torsin
-	-	-	-	-	-	1	61	4.0E-37	PANTHER	PTHR32429:SF13	-
-	-	-	-	-	-	1	61	4.0E-37	PANTHER	PTHR32429	-
Pp3c22_sORF1882	Pp3c22_13180	cis-sORF	Stop codon excision	TRUE	Pp3c22_13180	1	41	8.3E-4	Gene3D	G3DSA:3.40.850.10	-
Pp3c22_sORF1891	Pp3c22_13060	trans-sORF	-	-	Pp3c19_18560	26	46	-	MobiDBLite	mobidb-lite	consensus disorder prediction
Pp3c22_sORF2145	Pp3c22_15050	trans-sORF	-	-	Pp3c24_18670	43	76	-	MobiDBLite	mobidb-lite	consensus disorder prediction
Pp3c23_sORF1	Pp3c23_14820	cis-sORF	Stop codon excision	TRUE	Pp3c23_14820	-	-	-	-	-	-
Pp3c23_sORF31	ID=XLOC_007285|TCONS_00012371	trans-sORF	-	-	Pp3c11_4360,Pp3c18_10040,Pp3c5_21720,Pp3c5_21722,Pp3c2_4520,Pp3c1_36530,Pp3c12_13910,Pp3c3_35680,Pp3c19_18770,Pp3c12_23260,Pp3c1_39640,Pp3c14_17710,Pp3c2_5260	2	55	1.0E-19	PANTHER	PTHR10795	-
-	-	-	-	-	-	1	41	1.6E-9	Pfam	PF00082	Subtilase family
-	-	-	-	-	-	1	57	8.7E-17	Gene3D	G3DSA:3.40.50.200	-
-	-	-	-	-	-	2	55	1.0E-19	PANTHER	PTHR10795:SF477	-
-	-	-	-	-	-	4	41	6.55E-13	SUPERFAMILY	SSF52743	-
Pp3c23_sORF402	Pp3c23_18740	trans-sORF	Start codon excision	TRUE	Pp3c8_23990	-	-	-	-	-	-
Pp3c23_sORF494	Pp3c23_19830	trans-sORF	-	-	Pp3c24_19560,Pp3c6_21650,Pp3c15_2730	-	-	-	-	-	-
Pp3c23_sORF619	Pp3c23_2190	cis/trans-sORF	Stop codon excision	TRUE	Pp3c23_2190,Pp3c23_960	-	-	-	-	-	-
Pp3c23_sORF782	Pp3c23_22700	cis-sORF	Stop codon excision	TRUE	Pp3c23_22700	-	-	-	-	-	-
Pp3c23_sORF955	Pp3c23_4180	cis-sORF	Stop codon excision	TRUE	Pp3c23_4180	-	-	-	-	-	-
Pp3c23_sORF1258	Pp3c23_7780	cis-sORF	Stop codon excision	TRUE	Pp3c23_7780	-	-	-	-	-	-
Pp3c23_sORF1311	Pp3c23_8140	trans-sORF	-	-	Pp3c20_21990	1	20	6.9E-7	Pfam	PF01184	GPR1/FUN34/yaaH family
Pp3c23_sORF1319	Pp3c23_8220	trans-sORF	Truncation	TRUE	Pp3c5_26860,Pp3c16_22430,Pp3c25_13260,Pp3c8_5770,Pp3c6_3470,Pp3c20_18830	1	39	-	MobiDBLite	mobidb-lite	consensus disorder prediction
-	-	-	-	-	-	1	61	3.9E-27	PANTHER	PTHR11721:SF8	-
-	-	-	-	-	-	1	61	3.9E-27	PANTHER	PTHR11721	-
-	-	-	-	-	-	6	49	1.1E-22	Gene3D	G3DSA:4.10.990.10	-
-	-	-	-	-	-	6	50	1.7E-8	SUPERFAMILY	SSF52080	-
Pp3c23_sORF1407	Pp3c23_9160	trans-sORF	Stop codon excision	TRUE	Pp3c23_9170,Pp3c24_4180,Pp3c20_8770,Pp3c8_22100	36	80	2.1E-12	Pfam	PF04193	PQ loop repeat
-	-	-	-	-	-	16	81	3.1E-22	PANTHER	PTHR16201:SF50	-
-	-	-	-	-	-	16	81	3.1E-22	PANTHER	PTHR16201	-
-	-	-	-	-	-	49	80	7.2E-6	SMART	SM00679	-
Pp3c23_sORF1668	Pp3c23_11270	cis-sORF	Start codon excision	TRUE	Pp3c23_11270	-	-	-	-	-	-
Pp3c23_sORF1677	Pp3c23_11430	cis-sORF	Stop codon excision	TRUE	Pp3c23_11430	-	-	-	-	-	-
Pp3c23_sORF1723	Pp3c23_11520	trans-sORF	-	-	Pp3c23_16220,Pp3c7_23280	-	-	-	-	-	-
Pp3c23_sORF1755	Pp3c23_11820	cis/trans-sORF	Truncation	TRUE	Pp3c20_23930,Pp3c17_80,Pp3c26_15540,Pp3c26_15510,Pp3c26_15490,Pp3c23_11820,Pp3c7_27360,Pp3c7_27140,Pp3c19_970,Pp3c17_8980,Pp3c24_12980,Pp3c24_5410	-	-	-	-	-	-
Pp3c23_sORF1848	Pp3c23_12970	cis-sORF	Excision,Stop codon excision	TRUE	Pp3c23_12970	-	-	-	-	-	-
Pp3c23_sORF1968	Pp3c23_13990	cis/trans-sORF	Stop codon excision	TRUE	Pp3c23_13990,Pp3c24_1830	-	-	-	-	-	-
Pp3c24_sORF50	Pp3c24_15800	cis-sORF	Start codon excision,Stop codon excision	TRUE	Pp3c24_15800	-	-	-	-	-	-
Pp3c24_sORF451	Pp3c24_19580	cis-sORF	Stop codon excision	TRUE	Pp3c24_19580	1	23	-	MobiDBLite	mobidb-lite	consensus disorder prediction
Pp3c24_sORF454	Pp3c24_19580	cis-sORF	Stop codon excision	TRUE	Pp3c24_19580	-	-	-	-	-	-
Pp3c24_sORF488	Pp3c24_19970	trans-sORF	-	-	Pp3c12_2550	-	-	-	-	-	-
Pp3c24_sORF750	Pp3c24_250	cis/trans-sORF	Start codon excision	TRUE	Pp3c24_250,Pp3c23_6670	1	87	-	MobiDBLite	mobidb-lite	consensus disorder prediction
-	-	-	-	-	-	61	86	2.4E-13	Pfam	PF07557	Shugoshin C terminus
Pp3c24_sORF840	Pp3c24_4490	cis-sORF	Stop codon excision	TRUE	Pp3c24_4490	-	-	-	-	-	-
Pp3c24_sORF939	Pp3c24_4780	trans-sORF	-	-	Pp3c8_9570,Pp3c20_16650	-	-	-	-	-	-
Pp3c24_sORF954	Pp3c24_4880	trans-sORF	-	-	Pp3c5_20800	-	-	-	-	-	-
Pp3c24_sORF997	Pp3c24_5210	trans-sORF	Stop codon excision	TRUE	Pp3c8_8380	-	-	-	-	-	-
Pp3c24_sORF1045	Pp3c24_710	cis/trans-sORF	Start codon excision,Stop codon excision	TRUE	Pp3c24_710,Pp3c10_21040	-	-	-	-	-	-
Pp3c24_sORF1361	Pp3c24_8830	cis/trans-sORF	Stop codon excision	TRUE	Pp3c24_8830,Pp3c8_12340,Pp3c8_12344,Pp3c20_10590	-	-	-	-	-	-
Pp3c24_sORF1463	Pp3c24_9990	cis-sORF	Stop codon excision	TRUE	Pp3c24_9990	-	-	-	-	-	-
Pp3c24_sORF1497	Pp3c24_1050	cis/trans-sORF	Stop codon excision	TRUE	Pp3c24_1050,Pp3c10_24000,Pp3c23_13750,Pp3c20_21690,Pp3c15_6160	1	38	8.9E-16	PANTHER	PTHR33565	-
-	-	-	-	-	-	1	38	8.9E-16	PANTHER	PTHR33565:SF5	-
-	-	-	-	-	-	7	27	1.8E-7	Pfam	PF05564	Dormancy/auxin associated protein
Pp3c24_sORF1833	Pp3c24_13140	cis-sORF	Stop codon excision	TRUE	Pp3c24_13140	-	-	-	-	-	-
Pp3c24_sORF1978	Pp3c24_14480	trans-sORF	-	-	Pp3c15_25630	-	-	-	-	-	-
Pp3c24_sORF1985	Pp3c24_14620	trans-sORF	-	-	Pp3c8_23170	-	-	-	-	-	-
Pp3c25_sORF103	ID=XLOC_004061|TCONS_00006903	trans-sORF	-	-	Pp3c5_28440	-	-	-	-	-	-
Pp3c25_sORF158	Pp3c25_15450	trans-sORF	-	-	Pp3s124_100,Pp3c22_19580,Pp3c11_470,Pp3c21_9750,Pp3c11_6580,Pp3c7_22790,Pp3c26_6560,Pp3c23_6470,Pp3c2_24000,Pp3c15_21450,Pp3c27_5460,Pp3c17_14010,Pp3c3_26120,Pp3c1_1880,Pp3c2_30400,Pp3c27_4400,Pp3c27_4440,Pp3c22_19010,Pp3c7_17090,Pp3c21_19760,Pp3c17_21950,Pp3c18_21260,Pp3c5_14800,Pp3c2_37410,Pp3c4_30340,Pp3c6_19010,Pp3c8_21260,Pp3c24_17830,Pp3c1_39440,Pp3c12_8440,Pp3c3_3050	1	63	3.8E-19	PANTHER	PTHR24298	-
-	-	-	-	-	-	1	69	1.3E-16	Gene3D	G3DSA:1.10.630.10	-
-	-	-	-	-	-	1	63	3.8E-19	PANTHER	PTHR24298:SF196	-
-	-	-	-	-	-	1	65	6.16E-17	SUPERFAMILY	SSF48264	-
-	-	-	-	-	-	3	12	-	ProSitePatterns	PS00086	Cytochrome P450 cysteine heme-iron ligand sig-ture.
-	-	-	-	-	-	1	55	3.8E-10	Pfam	PF00067	Cytochrome P450
Pp3c25_sORF159	Pp3c25_15450	trans-sORF	Start codon excision	TRUE	Pp3c11_470	-	-	-	-	-	-
Pp3c25_sORF197	ID=XLOC_014702|TCONS_00024987	trans-sORF	-	-	Pp3c14_970	-	-	-	-	-	-
Pp3c25_sORF406	Pp3c25_330	cis-sORF	Stop codon excision	TRUE	Pp3c25_330	-	-	-	-	-	-
Pp3c25_sORF439	Pp3c25_4320	cis-sORF	Stop codon excision	TRUE	Pp3c25_4320	-	-	-	-	-	-
Pp3c25_sORF500	Pp3c25_4690	cis-sORF	Excision,Stop codon excision	TRUE	Pp3c25_4690	-	-	-	-	-	-
Pp3c25_sORF533	Pp3c25_4920	cis-sORF	Stop codon excision	TRUE	Pp3c25_4920	-	-	-	-	-	-
Pp3c25_sORF712	Pp3c25_5990	trans-sORF	-	-	Pp3c6_16870,Pp3c6_16850,Pp3c16_14660,Pp3c16_14590,Pp3c16_14640,Pp3c16_14730,Pp3c7_7300,Pp3c7_7280,Pp3c21_8110	-	-	-	-	-	-
Pp3c25_sORF713	Pp3c25_5990	cis/trans-sORF	Start codon excision	TRUE	Pp3c25_5990,Pp3c16_14660,Pp3c16_14590,Pp3c16_14640,Pp3c16_14730	-	-	-	-	-	-
Pp3c25_sORF795	Pp3c25_6670	trans-sORF	Stop codon excision	TRUE	Pp3c5_24670	-	-	-	-	-	-
Pp3c25_sORF805	Pp3c25_6520	cis/trans-sORF	Stop codon excision	TRUE	Pp3c25_6520,Pp3c6_7790,Pp3c16_18860,Pp3c10_8120,Pp3c1_34410	-	-	-	-	-	-
Pp3c25_sORF917	Pp3c25_560	cis-sORF	Stop codon excision	TRUE	Pp3c25_560	-	-	-	-	-	-
Pp3c25_sORF939	Pp3c25_7770	cis/trans-sORF	Stop codon excision	TRUE	Pp3c25_7770,Pp3c16_2310,Pp3c6_17900,Pp3c22_20080	1	71	2.3E-19	PANTHER	PTHR31172:SF7	-
-	-	-	-	-	-	27	71	1.5E-17	Pfam	PF16711	Actin-binding domain of plant-specific actin-binding protein
-	-	-	-	-	-	1	71	2.3E-19	PANTHER	PTHR31172	-
Pp3c25_sORF971	Pp3c25_630	cis/trans-sORF	Excision,Stop codon excision	TRUE	Pp3c25_630,Pp3c5_21200,Pp3c25_1200	4	45	1.3E-6	Pfam	PF06963	Ferroportin1 (FPN1)
Pp3c25_sORF1036	Pp3c25_760	cis/trans-sORF	Start codon excision,Stop codon excision	TRUE	Pp3c25_760,Pp3c5_12660,Pp3c16_6660,Pp3c3_24830,Pp3c10_18650,Pp3c3_35240,Pp3c10_20120,Pp3c19_8330,Pp3c16_19430,Pp3c12_24000,Pp3c18_13190,Pp3c25_3840,Pp3c1_22810,Pp3c1_6010,Pp3c10_19460,Pp3c8_2010,Pp3c5_12750,Pp3c5_12820,Pp3c5_12770,Pp3c5_23400,Pp3c3_30560,Pp3c4_10640,Pp3c3_35217,Pp3c3_32350,Pp3c25_15080,Pp3c3_35040,Pp3c8_1680,Pp3c12_23790,Pp3c8_1440,Pp3c17_6440,Pp3c4_22420,Pp3c21_22110,Pp3c3_36450…	1	82	2.7E-19	Gene3D	G3DSA:2.160.20.10	-
-	-	-	-	-	-	2	82	2.5E-33	PANTHER	PTHR31321:SF51	-
-	-	-	-	-	-	2	76	1.8E-11	Pfam	PF01095	Pectinesterase
-	-	-	-	-	-	2	82	2.5E-33	PANTHER	PTHR31321	-
-	-	-	-	-	-	2	79	1.02E-14	SUPERFAMILY	SSF51126	-
Pp3c25_sORF1294	Pp3c25_11760	trans-sORF	Excision	FALSE	Pp3c10_18909	-	-	-	-	-	-
Pp3c25_sORF1341	Pp3c25_12400	trans-sORF	-	-	Pp3c17_21540,Pp3c14_16840,Pp3c22_12040,Pp3c1_41620,Pp3c1_16110,Pp3c19_18410	8	64	5.78E-11	SUPERFAMILY	SSF52058	-
-	-	-	-	-	-	2	68	1.5E-11	Gene3D	G3DSA:3.80.10.10	-
-	-	-	-	-	-	43	63	0.22	Pfam	PF00560	Leucine Rich Repeat
-	-	-	-	-	-	18	40	0.0048	Pfam	PF00560	Leucine Rich Repeat
Pp3c26_sORF30	Pp3c26_1920	trans-sORF	Excision	FALSE	Pp3c26_1970	36	68	-	MobiDBLite	mobidb-lite	consensus disorder prediction
Pp3c26_sORF207	Pp3c26_4000	cis/trans-sORF	Stop codon excision	TRUE	Pp3c26_4000,Pp3c4_25740,Pp3c12_1870	-	-	-	-	-	-
Pp3c26_sORF233	Pp3c26_4170	cis/trans-sORF	Stop codon excision	TRUE	Pp3c26_4170,Pp3c4_15740	1	27	-	MobiDBLite	mobidb-lite	consensus disorder prediction
Pp3c26_sORF411	Pp3c26_380	cis-sORF	Start codon excision	TRUE	Pp3c26_380	1	46	-	MobiDBLite	mobidb-lite	consensus disorder prediction
Pp3c26_sORF822	Pp3c26_10620	cis-sORF	Stop codon excision	TRUE	Pp3c26_10620	53	84	-	MobiDBLite	mobidb-lite	consensus disorder prediction
Pp3c26_sORF885	Pp3c26_10970	cis/trans-sORF	Start codon excision	TRUE	Pp3c26_10970,Pp3c4_24240	41	64	-	MobiDBLite	mobidb-lite	consensus disorder prediction
-	-	-	-	-	-	5	51	4.2E-12	PANTHER	PTHR34459	-
Pp3c26_sORF922	Pp3c26_11360	cis-sORF	Start codon excision	TRUE	Pp3c26_11360	15	56	2.02E-6	SUPERFAMILY	SSF46934	-
-	-	-	-	-	-	6	56	4.2E-5	Gene3D	G3DSA:1.10.8.10	-
Pp3c26_sORF950	Pp3c26_11480	trans-sORF	-	-	Pp3c4_30530	-	-	-	-	-	-
Pp3c26_sORF1039	ID=XLOC_029876|TCONS_00051165	trans-sORF	Stop codon excision	TRUE	Pp3c4_29750	1	22	-	MobiDBLite	mobidb-lite	consensus disorder prediction
-	-	-	-	-	-	43	78	-	MobiDBLite	mobidb-lite	consensus disorder prediction
Pp3c26_sORF1092	Pp3c26_12890	cis/trans-sORF	Start codon excision,Stop codon excision	TRUE	Pp3c26_12890,Pp3c2_37290,Pp3c3_10220,Pp3c13_11270	-	-	-	-	-	-
Pp3c26_sORF1136	Pp3c26_13310	cis-sORF	Start codon excision,Stop codon excision	TRUE	Pp3c26_13310	1	71	4.1E-4	Gene3D	G3DSA:3.40.50.10480	-
Pp3c26_sORF1245	Pp3c26_14030	cis-sORF	Stop codon excision	TRUE	Pp3c26_14030	-	-	-	-	-	-
Pp3c26_sORF1280	Pp3c26_1960	cis/trans-sORF	Start codon excision	TRUE	Pp3c26_1960,Pp3c4_22170,Pp3c13_6960	4	92	4.0E-36	PANTHER	PTHR35320	-
-	-	-	-	-	-	4	92	4.0E-36	PANTHER	PTHR35320:SF2	-
Pp3c26_sORF1338	Pp3c26_14650	trans-sORF	-	-	Pp3c2_32230,Pp3c1_5970,Pp3c11_1650,Pp3c5_25660	-	-	-	-	-	-
Pp3c26_sORF1405	Pp3c26_15390	cis-sORF	Excision,Stop codon excision	TRUE	Pp3c26_15390	-	-	-	-	-	-
Pp3c27_sORF254	Pp3c27_3440	trans-sORF	Start codon excision	TRUE	Pp3c27_3460	-	-	-	-	-	-
Pp3c27_sORF267	Pp3c27_3630	cis-sORF	Stop codon excision	TRUE	Pp3c27_3630	23	52	-	MobiDBLite	mobidb-lite	consensus disorder prediction
Pp3c27_sORF391	Pp3c27_4590	cis-sORF	Stop codon excision	TRUE	Pp3c27_4590	-	-	-	-	-	-
Pp3c27_sORF457	Pp3c27_4900	cis-sORF	Stop codon excision	TRUE	Pp3c27_4900	16	50	-	MobiDBLite	mobidb-lite	consensus disorder prediction
Pp3c27_sORF522	Pp3c27_5460	cis-sORF	Stop codon excision	TRUE	Pp3c27_5460	-	-	-	-	-	-
Pp3c27_sORF527	Pp3c27_5490	cis-sORF	Stop codon excision	TRUE	Pp3c27_5490	-	-	-	-	-	-
Pp3c27_sORF577	Pp3c27_6080	cis-sORF	Stop codon excision	TRUE	Pp3c27_6080	1	48	5.2E-21	PANTHER	PTHR36051	-
-	-	-	-	-	-	1	48	5.2E-21	PANTHER	PTHR36051:SF2	-
-	-	-	-	-	-	1	34	5.0	ProSiteProfiles	PS51257	Prokaryotic membrane lipoprotein lipid attachment site profile.
Pp3c27_sORF813	Pp3c27_7830	trans-sORF	-	-	Pp3c16_20280	-	-	-	-	-	-
Pp3c27_sORF883	Pp3c27_8610	trans-sORF	-	-	Pp3c20_16710,Pp3c23_2940	26	51	-	MobiDBLite	mobidb-lite	consensus disorder prediction
Pp3c27_sORF958	Pp3c27_1630	cis/trans-sORF	Stop codon excision	TRUE	Pp3c27_1630,Pp3c6_17640,Pp3c16_16350,Pp3c5_13560	18	55	9.7E-11	Pfam	PF06058	Dcp1-like decapping family
-	-	-	-	-	-	20	55	7.74E-9	SUPERFAMILY	SSF50729	-
-	-	-	-	-	-	1	55	1.0E-20	PANTHER	PTHR16290	-
-	-	-	-	-	-	11	63	2.5E-11	Gene3D	G3DSA:2.30.29.30	-
-	-	-	-	-	-	1	55	1.0E-20	PANTHER	PTHR16290:SF14	-
