# Supplementary material for: Distinct types of short open reading frames are translated in plant cells
Source: HighWire-hosted journal article supplement (doi:10.1101/gr.253302.119), 2019-08-06
Supplement: Supplemental_Table_S6.xlsx.xlsx [file Supplemental_Table_S6.xlsx.xlsx]

## Sheet: Table S6
Supplemental Table S6. The results of measurements of moss plants diameteres and numbers of leafy shoots in different genotypes
PSEP1KO - the diameter of moss plants with overexpression of PSEP1
PSEP1OE - the diameter of moss plants with knockout of PSEP1
PSEP3KO - the diameter of moss plants with knockout of PSEP3
PSEP3OE - the diameter of moss plants with overexpression of the PSEP3
PSEP25KO - the diameter of moss plants with knockout of PSEP25
PSEP25OE - the diameter of moss plants with overexpression of PSEP25
PSEP18OE - the diameter of moss plants with overexpression of PSEP18
PSEP18KO - the diameter of moss plants with knockout of PSEP18
PSEP25 OE gametophores - the number of leafy shoots in wild type and two PSEP25 OE lines
PSEP25 KO gametophores - the number of leafy shoots in wild type and three psep25 KO lines

## Sheet: PSEP1KO
Genotype	diameter, mm
wt	28.3333
wt	28.1117
wt	22.3859
wt	25.5628
wt	23.8266
wt	34.6132
KO-1	15.3575
KO-1	15.9099
KO-1	14.3631
KO-1	16.9779
KO-1	14.5472
KO-1	14.2158
KO-2	20.8843
KO-2	25.7722
KO-2	24.1799
KO-2	23.1061
KO-2	19.9586
KO-2	22.5136

## Sheet: PSEP1OE
Genotype	diameter, mm
wt	17.7253
wt	19.3174
wt	20.9095
wt	19.9542
wt	21.4755
wt	19.3174
OE-1	24.9849
OE-1	24.9249
OE-1	25.9288
OE-1	23.8461
OE-1	23.6889
OE-1	25.212
OE-2	25.6017
OE-2	24.3381
OE-2	24.6676
OE-2	22.7779
OE-2	22.9582
OE-2	25.6302
OE-3	24.6333
OE-3	24.563
OE-3	23.7343
OE-3	21.359
OE-3	24.2806
OE-3	23.3164

## Sheet: PSEP3KO
Genotype	diameter, mm
wt	31.2209
wt	31.6622
wt	30.318
wt	34.1638
wt	35.3538
wt	29.5063
KO-1	16.7221
KO-1	11.8323
KO-1	12.2295
KO-1	13.2647
KO-1	16.7562
KO-1	14.8298
KO-2	16.4708
KO-2	14.2194
KO-2	18.6092
KO-2	17.5509
KO-2	19.9343
KO-2	15.7924

## Sheet: PSEP3OE
Genotype	diameter, mm
wt	13.7306
wt	12.8097
wt	11.7631
wt	12.6841
wt	12.4748
wt	11.0515
OE-1	5.55721
OE-1	6.02031
OE-1	8.37791
OE-1	7.70431
OE-1	5.26251
OE-1	6.35711
OE-2	4.59936
OE-2	4.34548
OE-2	3.19547
OE-2	3.33714
OE-2	3.86683
OE-2	5.10778

## Sheet: PSEP25KO
Genotype	diameter, mm
wt	21.1185
wt	14.5664
wt	21.0201
wt	21.9061
wt	21.4395
wt	21.4237
KO-1	16.2476
KO-1	19.2427
KO-1	18.8114
KO-1	15.2937
KO-1	17.4732
KO-1	16.1023
KO-2	15.3856
KO-2	13.5068
KO-2	14.0209
KO-2	12.5841
KO-2	15.3524
KO-2	15.8374
KO-3	14.065
KO-3	16.4973
KO-3	15.8587
KO-3	16.186
KO-3	16.262
KO-3	14.6985

## Sheet: PSEP25OE
Genotypes25	diameter, mm
wt	13.6337
wt	13.8861
wt	12.7079
wt	14.2649
wt	13.7599
wt	14.2649
OE-1	11.8275
OE-1	11.9525
OE-1	11.2861
OE-1	11.2445
OE-1	11.7442
OE-1	11.4111
OE-2	11.2434
OE-2	11.8052
OE-2	13.591
OE-2	12.756
OE-2	13.1772
OE-2	12.078

## Sheet: PSEP18OE
Genotype18	diameter, mm
wt	21.3962
wt	22.2377
wt	21.4681
wt	19.5593
wt	21.9196
wt	22.7919
wt	20.8359
wt	21.366
wt	20.2854
wt	20.9582
wt	20.0714
wt	21.1009
OE-1	18.3632
OE-1	21.2283
OE-1	18.1287
OE-1	17.7209
OE-1	17.6801
OE-1	19.2503
OE-2	16.8967
OE-2	18.1021
OE-2	17.9907
OE-2	16.5421
OE-2	18.4263
OE-2	15.985

## Sheet: PSEP18KO
Genotype18	diameter, mm
wt	19.24
wt	15.23
wt	17.63
wt	17.77
wt	18.7
wt	17.67
KO-1	15.81
KO-1	15.11
KO-1	13.81
KO-1	14.1
KO-1	15.81
KO-1	14.59
KO-2	17.65
KO-2	16.39
KO-2	16.89
KO-2	16.03
KO-2	17.89
KO-2	15.74

## Sheet: PSEP25 OE gametophores
Genotype25	Number of gametophores
wt	19
wt	36
wt	25
wt	19
wt	15
wt	18
OE-1	60
OE-1	87
OE-1	48
OE-1	55
OE-1	52
OE-1	43
OE-2	44
OE-2	50
OE-2	43
OE-2	55
OE-2	54
OE-2	55

[truncated: 1 more sheets: PSEP25 KO gametophores]
