# Supplementary material for: Distinct types of short open reading frames are translated in plant cells
Source: HighWire-hosted journal article supplement (doi:10.1101/gr.253302.119), 2019-08-06
Supplement: Supplemental_Table_S7.docx.docx [file Supplemental_Table_S7.docx.docx]

**Supplemental Table S7.** List of primers used in construct production for moss transformation and RT-PCR

| **Primer** | **Sequence** | |
| --- | --- | --- |
| ***PSEPs coding sequence amplification*** | | |
| PEP4f | TAGTTGGAATAGGTTCATGGTCCAGCCTTTACTTGCAAG | |
| PEP4r | AGTATGGAGTTGGGTTCTCATTTCCGGTGATCTCGTTTA | |
| pep3FXho | AGTCCTCGAGATGGTGCACCAAGATAACAG | |
| pep3RNhe | AGTCGCTAGCTCAGTTGGGGTAGCCGTTGT | |
| ep25FXho | AGTCCTCGAGATGGTGCAATCCAAGCAAGG | |
| pep25RNhe | AGTCGCTAGCCTACTTGGATTCTTCCTTAGG | |
| pep18FXho | agtcctcgagatgcaagctttcacggacac | |
| pep18RNhe | agtcgctagctcaggaggatggacgccagc | |
| ***generating of sgRNA expression cassette*** | | |
| 1f | GAGCTCGAATTCGTCCATTGAAGCAGACGTGTTGCGACAG | |
| 2r | ATCTACACCCATCGTCGCTAACCTGTCGCAACACGTCTGC | |
| 3f | TAGCGACGATGGGTGTAGATGTGATGTGATGTGATGGTGT | |
| 4r | GACGCCGCCGTGGAAGAACCACACCATCACATCACATCAC | |
| 5f | GGTTCTTCCACGGCGGCGTCCTTGCGGTGGCGGAGAAGG | |
| 6r | TGCCGCTCCTTCGGGATATCCCCTTCTCCGCCACCGCAAG | |
| 7f | GATATCCCGAAGGAGCGGCAGCGGGAGAGCACAAGCAGAAAG | |
| 8r | GGACCCACTCACTCACTGCACCCTTTCTGCTTGTGCTCTC | |
| 9f | TGCAGTGAGTGAGTGGGTCCAGCTGGGTGGCTGGCCGAGT | |
| 10r | CTCGAAACCCGGTCGCGTCCACTCGGCCAGCCACCCAGCT | |
| 11f | GACGCGACCGGGTTTCGAGGGGGCGGGGGAGAAAAGGGATGGAG | |
| 12r | CATTCCATGTGGGTTATATCCCTCGCTCCATCCCTTTTCTCC | |
| 13f | GGATATAACCCACATGGAATGGAGGTGGGTGTGAAGGCGGGT | |
| 14r | GTAAGTCCTCCACCTTCCTATATACCCGCCTTCACACCCACCT | |
| 15f | TAGGAAGGTGGAGGACTTACAACCCATGGGTCTTCGAGAAG | |
| 16r | TTTCTAGCTCTAAAACAGGTCTTCTCGAAGACCCATGGGT | |
| 17f | CCTGTTTTAGAGCTAGAAATAGCAAGTTAAAATAAGGCTAG | |
| 18r | TTTCAAGTTGATAACGGACTAGCCTTATTTTAACTTGC | |
| 19f | TCCGTTATCAACTTGAAAAAGTGGCACCGAGTC | |
| 20r | GACGAGCTCAAAAAAAGCACCGACTCGGTGCCACT | |
| bbF | GAGCTCGAATTCGTCCATTG | |
| bbR | GACGAGCTCAAAAAAAGCAC | |
| ***generating 20-mer guide sequence*** | |
| 3GTop | CCATGTGGTCCAGCCTTTACTTGCA |
| 3GBottom | AAACTGCAAGTAAAGGCTGGACCAC |
| pep3_1_Top | CCATGCACCAAGATAACAGCGGCTC |
| pep3_1_Bottom | AAACGAGCCGCTGTTATCTTGGTGC |
| pep25_2_Top | CCATGATGTCAGCTCCGCTGTTCTC |
| pep25_2_Bottom | AAACGAGAACAGCGGAGCTGACATC |
| pep18_1_Top | CCATGCAAGCTTTCACGGACACGCA |
| pep18_1_Bottom | AAACTGCGTGTCCGTGAAAGCTTGC |
| ***identifications clones with overexpression and knockout of PSEP1*** | |
| p5 | GGTGGAGCACGACACTCTG |
| p4r | GTTTAGGTTCAGTGGAGCGACTC |
| HygF | AGCTGCGCCGATGGTTTCTACAA |
| HygR | GCGCGTCTGCTGCTCCATACAA |
| seqF | CCAGGGTTTGAAGGTAGTCAAC |
| seqR | CAGTGGAGCGACTCGTCGAG |
| ***identifications clones with overexpression and knockout of PSEP3*** | |
| seqF3 | CGTATTCTTACTCGGCGGCA |
| seqR3 | TCCACAGGAGATGAGTCCGA |
| pnF3 | GATAGCTTGGGCTGCAGGT |
| pnR3 | ACGGACGAAAGCTGGGAGG |
| ***identifications clones with overexpression and knockout PSEP25*** | |
| seqF25 | AAAGAGGGATTGCGACGGAG |
| seqR25 | ATTACTCACTGGGGCGACCT |
| pnF25 | GATAGCTTGGGCTGCAGGT |
| pnR25 | ACGGACGAAAGCTGGGAGG |
| ***identifications clones with overexpression and knockout PSEP18*** | |
| seqF18 | TCTCGGCACAAACTCACAG |
| seqR18 | CACAGAACAGCAAGGTGG |
| pnF18 | GATAGCTTGGGCTGCAGGT |
| pnR18 | ACGGACGAAAGCTGGGAGG |
| ***RT-PCR*** | |
| p47F | CTGGGAGACAGCTTACGTGTT |
| p47R | TGAGGCGTTCGGCAAAGTAT |
| p28F | GGAGTGTGGCAGAGTGACAA |
| p28R | CTCAGACACGCTACCGATCC |
| p6F | ATCGGCATCATCTTGTGGCA |
| p6R | GACTGTGAAGCTGAGAGGCA |
| p11F | GCTCGGAGGAATCCTTGGAC |
| p11R | TCTGCCACCCGAATTAGCTT |
| p3F | CAGAGGCACTGAAACGGAGT |
| p3R | CTTCTGGTTGTGTGCATCTGT |
| p25F | TCCCTCTCTGACCGTAGCTT |
| p25R | CTTTAGGGTCATAAAAGTTGGC |
| p10F | GAGGACGAGTAAGGGTGCAG |
| p10R | TTTAACGGGCCATCGAGGTG |
| p31F | ATCTCACAGCACCAGCCAC |
| p31R | CACGAGAGGGCAACCAGAAT |
| p38F | TTGCGTTCGAGTCCACTACC |
| p38R | ATGACGAGTAGCTCCCACCT |
| p43F | GCGGGAGCTTAATTTGCAGG |
| p43R | AAGGGCACACGATCTGAAGG |
| p01F | TCTGAGCTCTCGGGAAGTCA |
| p01R | TGTATTGGAGCACTGGTCGG |
| p50F | TGGGGAGAGAGGTCACATGA |
| p50R | TTGATGGCCATTGCTGCTTT |
| p74F | CGCTTACCTTTGCGCATTGA |
| p74R | GGTTGCAGGGGTAATGGACA |
